# Supplementary material for: An expanded library of orthogonal split inteins enables modular multi-peptide assemblies
Source: PubMed Central journal article supplement (PMC7090010; doi:10.1038/s41467-020-15272-2), 2020-03-23
Supplement: 41467_2020_15272_MOESM1_ESM.pdf [file 41467_2020_15272_MOESM1_ESM.pdf]

## Supplementary Information

### An expanded library of orthogonal split inteins enables modular multi-peptide assemblies

Pinto *et al.*

#### Supplementary Figures

|                                                                                                                                        |    |
|----------------------------------------------------------------------------------------------------------------------------------------|----|
| Supplementary Figure 1   Phylogram of the inteins retrieved from InBase .....                                                          | 3  |
| Supplementary Figure 2   Split mCherry fluorescence assessment.....                                                                    | 4  |
| Supplementary Figure 3   Effect of the insertion of the junction sequence amino acid residues into mCherry ...                         | 5  |
| Supplementary Figure 4   <i>In vitro</i> analysis of mCherry insertion variants .....                                                  | 6  |
| Supplementary Figure 5   Effect of linker addition in NpuSsp and TerThyX <i>cis</i> -splicing activity .....                           | 7  |
| Supplementary Figure 6   Structural similarity of the inteins characterized .....                                                      | 8  |
| Supplementary Figure 7   Western blot analysis of <i>trans</i> -splicing of inteins split at different sites .....                     | 9  |
| Supplementary Figure 8   Effect of linker addition in NpuSsp and TerThyX <i>trans</i> -splicing activity.....                          | 10 |
| Supplementary Figure 9   Highly orthogonal split inteins. ....                                                                         | 11 |
| Supplementary Figure 10   Expression and solubility analysis of<br>split mCherry-split intein chimeric proteins .....                  | 12 |
| Supplementary Figure 11   Analysis of split mCherry-split intein chimeric proteins extracted<br>under mild denaturing conditions ..... | 13 |
| Supplementary Figure 12   Analysis of <i>in vitro trans</i> -splicing conditions .....                                                 | 14 |
| Supplementary Figure 13   Time course analysis of the <i>in vitro trans</i> -splicing of 24 split intein pairs .....                   | 15 |
| Supplementary Figure 14   End-point analysis of <i>in vitro trans</i> -splicing of 24 split intein pairs.....                          | 16 |
| Supplementary Figure 15   Time course analysis of the <i>in vitro trans</i> -splicing of the 12 most active inteins ....               | 17 |
| Supplementary Figure 16   End-point analysis of <i>in vitro trans</i> -splicing of the 12 most active inteins.....                     | 18 |
| Supplementary Figure 17   Split mCherry-split intein-based logic AND gates .....                                                       | 19 |
| Supplementary Figure 18   Split mCherry-split intein-based AND gates exhibiting C-terminal leakiness .....                             | 20 |
| Supplementary Figure 19   Characterization of split extracytoplasmic function (ECF) sigma factors.....                                 | 21 |
| Supplementary Figure 20   Effect of linker mutation on ECFs activity .....                                                             | 22 |
| Supplementary Figure 21   Orthogonality analysis of the mutated ECF sigma factors.....                                                 | 23 |
| Supplementary Figure 22   ECF16mut x SspGyrB AND gate characterization .....                                                           | 24 |
| Supplementary Figure 23   ECF17mut x NrdJ-1 AND gate characterization .....                                                            | 25 |
| Supplementary Figure 24   ECF20mut x M86 AND gate characterization .....                                                               | 26 |
| Supplementary Figure 25   ECF-based AND gates depend on inteins' splicing activity .....                                               | 27 |
| Supplementary Figure 26   3-input/3-output integrated circuit characterization .....                                                   | 28 |
| Supplementary Figure 27   Full-length SasG-based proteins expression analysis.....                                                     | 29 |
| Supplementary Figure 28   SasG3 assembly units <i>trans</i> -splicing and cross-reactivity assessment .....                            | 30 |
| Supplementary Figure 29   <i>In vitro</i> production of up to SasG5 <sup>30E20</sup> by recursive solid-phase assembly .....           | 31 |

## Supplementary Tables

|                                                                                                                  |    |
|------------------------------------------------------------------------------------------------------------------|----|
| Supplementary Table 1   List of viral and viral-like inteins retrieved from InBase.....                          | 32 |
| Supplementary Table 2   Characteristics of the inteins analyzed in this study .....                              | 36 |
| Supplementary Table 3   Mini-intein protein sequences and synthesized DNA sequences .....                        | 38 |
| Supplementary Table 4   Sequences for the N- and C-termini of the split inteins.....                             | 42 |
| Supplementary Table 5   List of primers used in this study.....                                                  | 45 |
| Supplementary Table 6   Regulatory parts and reporters used in this study .....                                  | 50 |
| Supplementary Table 7   List of the plasmids used in this study.....                                             | 52 |
| Supplementary Table 8   List and structure of the plasmids constructed in this study.....                        | 53 |
| Supplementary Table 9   Theoretical molecular weights of proteins<br>analyzed by SDS-PAGE and Western blots..... | 58 |

## Supplementary Note

|                                                                                     |    |
|-------------------------------------------------------------------------------------|----|
| Supplementary Note 1   Methods for constructing the plasmids used in this work..... | 60 |
|-------------------------------------------------------------------------------------|----|

## Supplementary Data (Provided as individual supplementary files) .....63

Supplementary Data 1 | *In vivo* orthogonality data

Supplementary Data 2 | *In vitro* orthogonality data

Supplementary Data 3 | *In vitro* splicing conditions screening data

Supplementary Data 4 | Sequences of the plasmids constructed in this work

Source Data | Source Data file

## References.....64

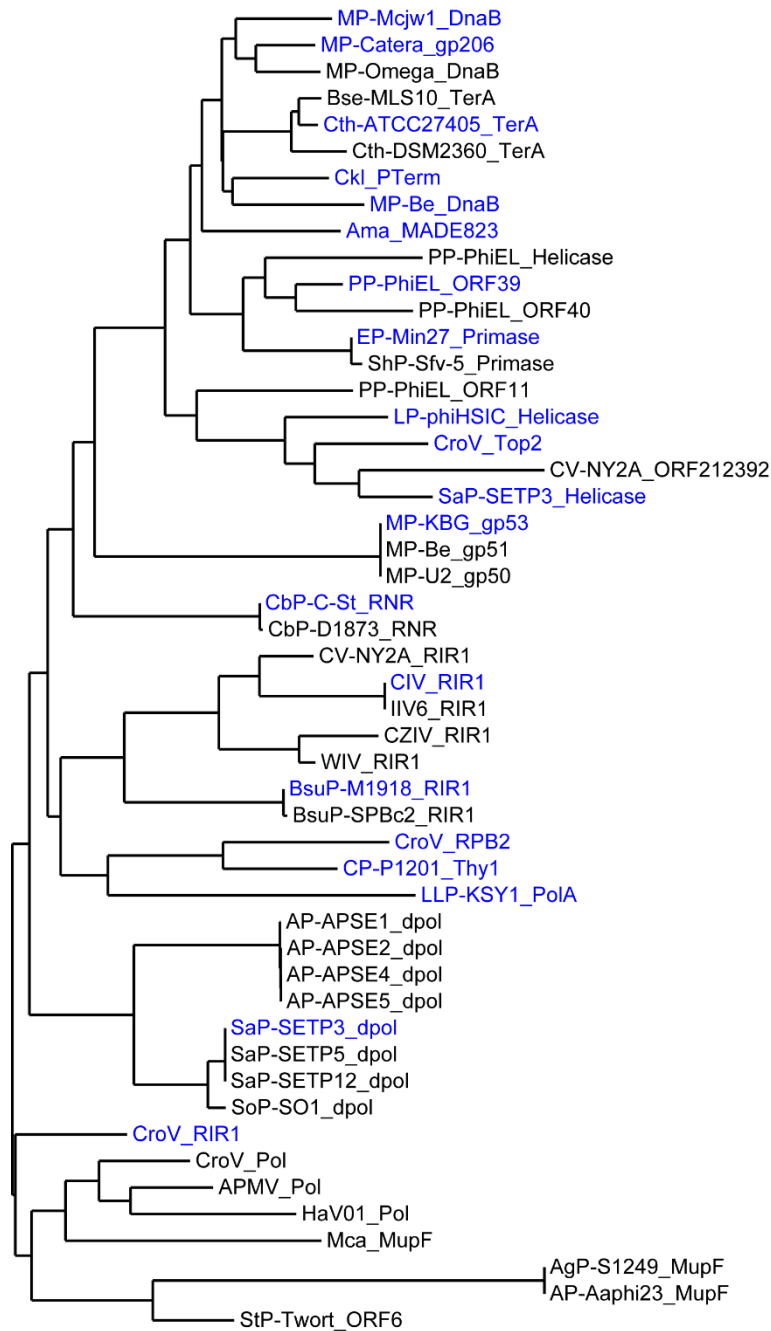

**Supplementary Figure 1 | Phylogram of the inteins retrieved from InBase.** The phylogenetic tree was constructed based on the structural alignment of the protein sequences of the inteins without endonuclease domains (mini-inteins). The alignment was performed using PROMALS3D, the alignment to tree format conversion was performed using BioNJ and the phylogenetic tree was constructed using TreeDyn 198.3 (both available at the <http://www.phylogeny.fr/index.cgi>). The inteins selected for further characterization are highlighted in blue.

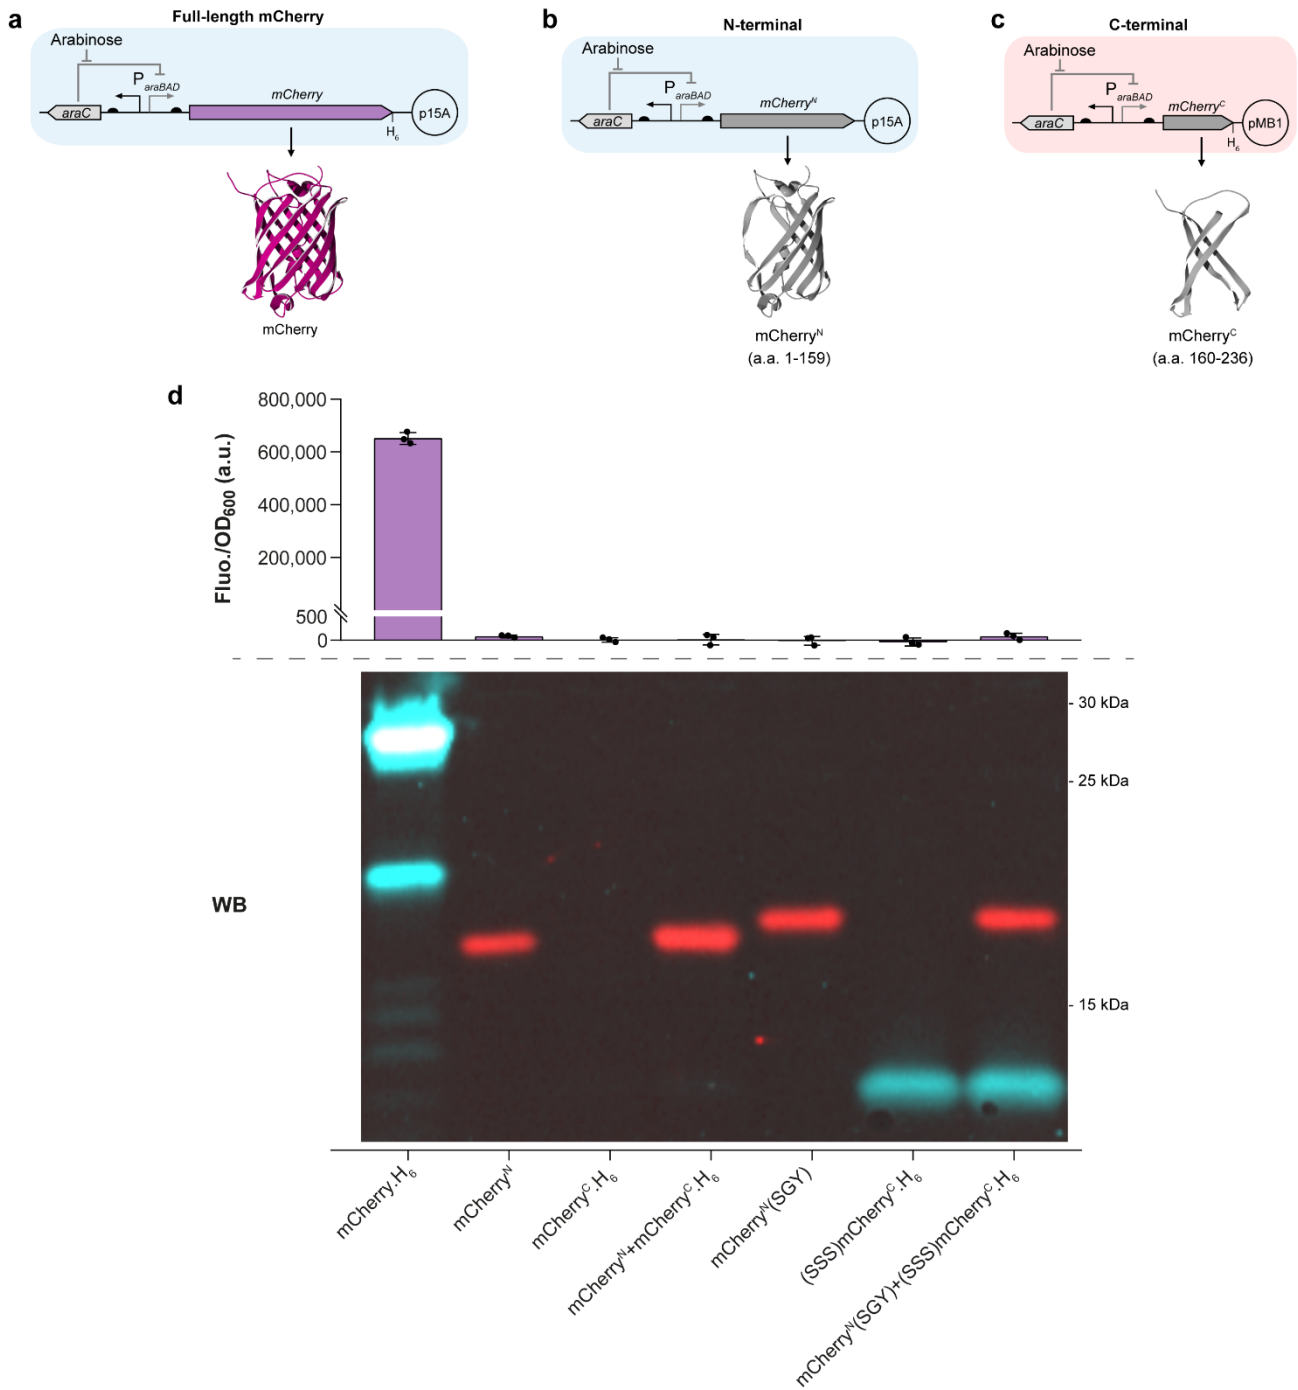

**Supplementary Figure 2 | Split mCherry fluorescence assessment.** **a-c**, Genetic circuits for the arabinose-induced expression of full-length mCherry (**a**), mCherry N-terminal (**b**) or mCherry C-terminal (**c**). Split mCherry is expressed from plasmids with different origins of replication. Promoters are represented by straight angle arrows and RBS by black semi-circles. mCherry is shown in purple and split mCherry halves are shown in gray; H<sub>6</sub> - hexahistidine tag. **d**, Background subtracted fluorescence (Fluo., top) and Western blot analysis (bottom) of *E. coli* cells harboring the genetic circuits for the expression of full-length mCherry (mCherry.H<sub>6</sub>), mCherry N-terminal (mCherry<sup>N</sup>), mCherry C-terminal (mCherry<sup>C</sup>.H<sub>6</sub>), mCherry N-terminal with extra SGY residues at the C-terminus (mCherry<sup>N</sup>(SGY)), mCherry C-terminal with extra SSS residues at the N-terminus ((SSS)mCherry<sup>C</sup>.H<sub>6</sub>) or combinations of the correlated halves. Fluorescence was measured 6 h after induction and normalized to the cell density (OD<sub>600</sub>). Bars represent the mean of three biological replicates ( $n = 3$ ) and error bars correspond to s.d. Samples from the three biological replicates were mixed and used for Western blot analysis. The red signal corresponds to the antibody recognizing the N-terminal of mCherry and the turquoise signal corresponds to the antibody recognizing the hexahistidine-tag (H<sub>6</sub>) at the C-terminus. The overlap of both signals (white) corresponds to full-length mCherry. Molecular weights corresponding to the protein standards are shown. Source data are provided as a Source Data file.

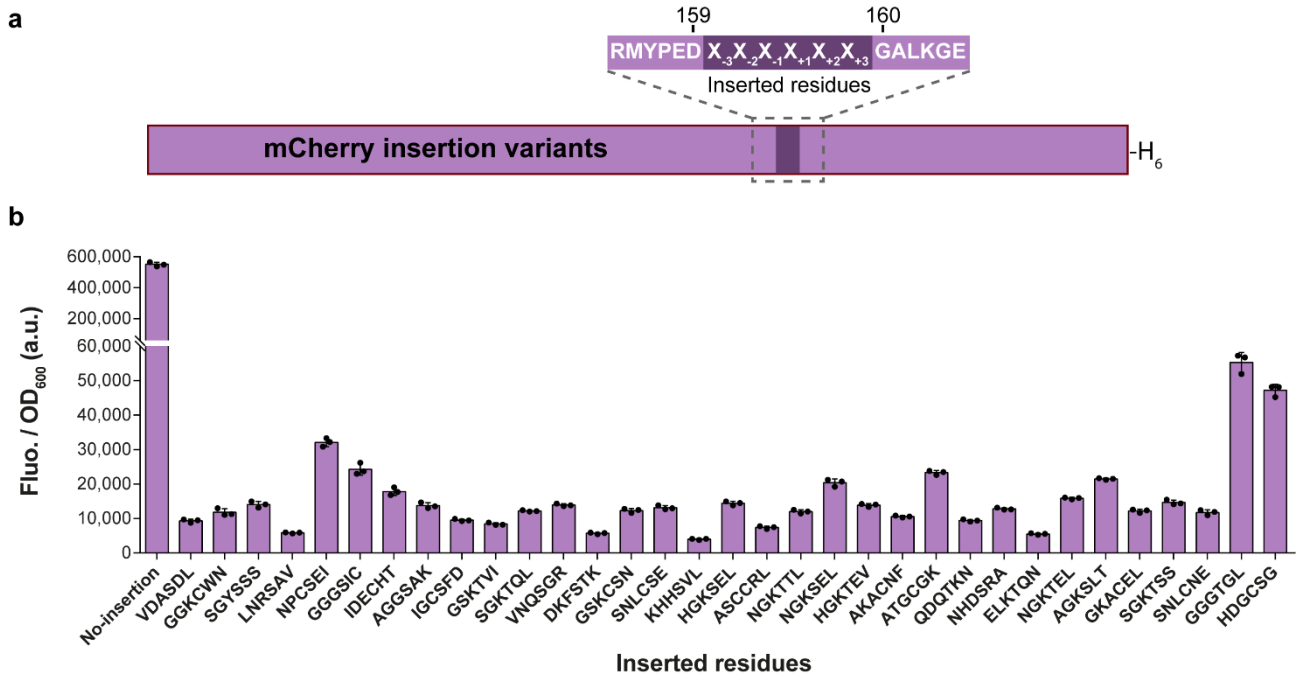

**Supplementary Figure 3 | Effect of the insertion of the junction sequence amino acid residues into mCherry.** (a) Schematics of the mCherry variants produced, showing the insertion of the junction sequence residues ( $X_{-3}$ ,  $X_{-2}$ ,  $X_{-1}$ ,  $X_{+1}$ ,  $X_{+2}$  and  $X_{+3}$ ) between mCherry residues 159 and 160. (b) Background subtracted fluorescence (Fluo.) of *E. coli* cells expressing the native mCherry (no-insertion) or variants with the corresponding inserted amino acid residues. Fluorescence was measured 7 h after induction (5 h of growth followed by 2 h incubation after chloramphenicol addition) and normalized to the cell density ( $OD_{600}$ ). Bars represent the mean of three biological replicates ( $n = 3$ ) and error bars correspond to s.d. Source data are provided as a Source Data file.

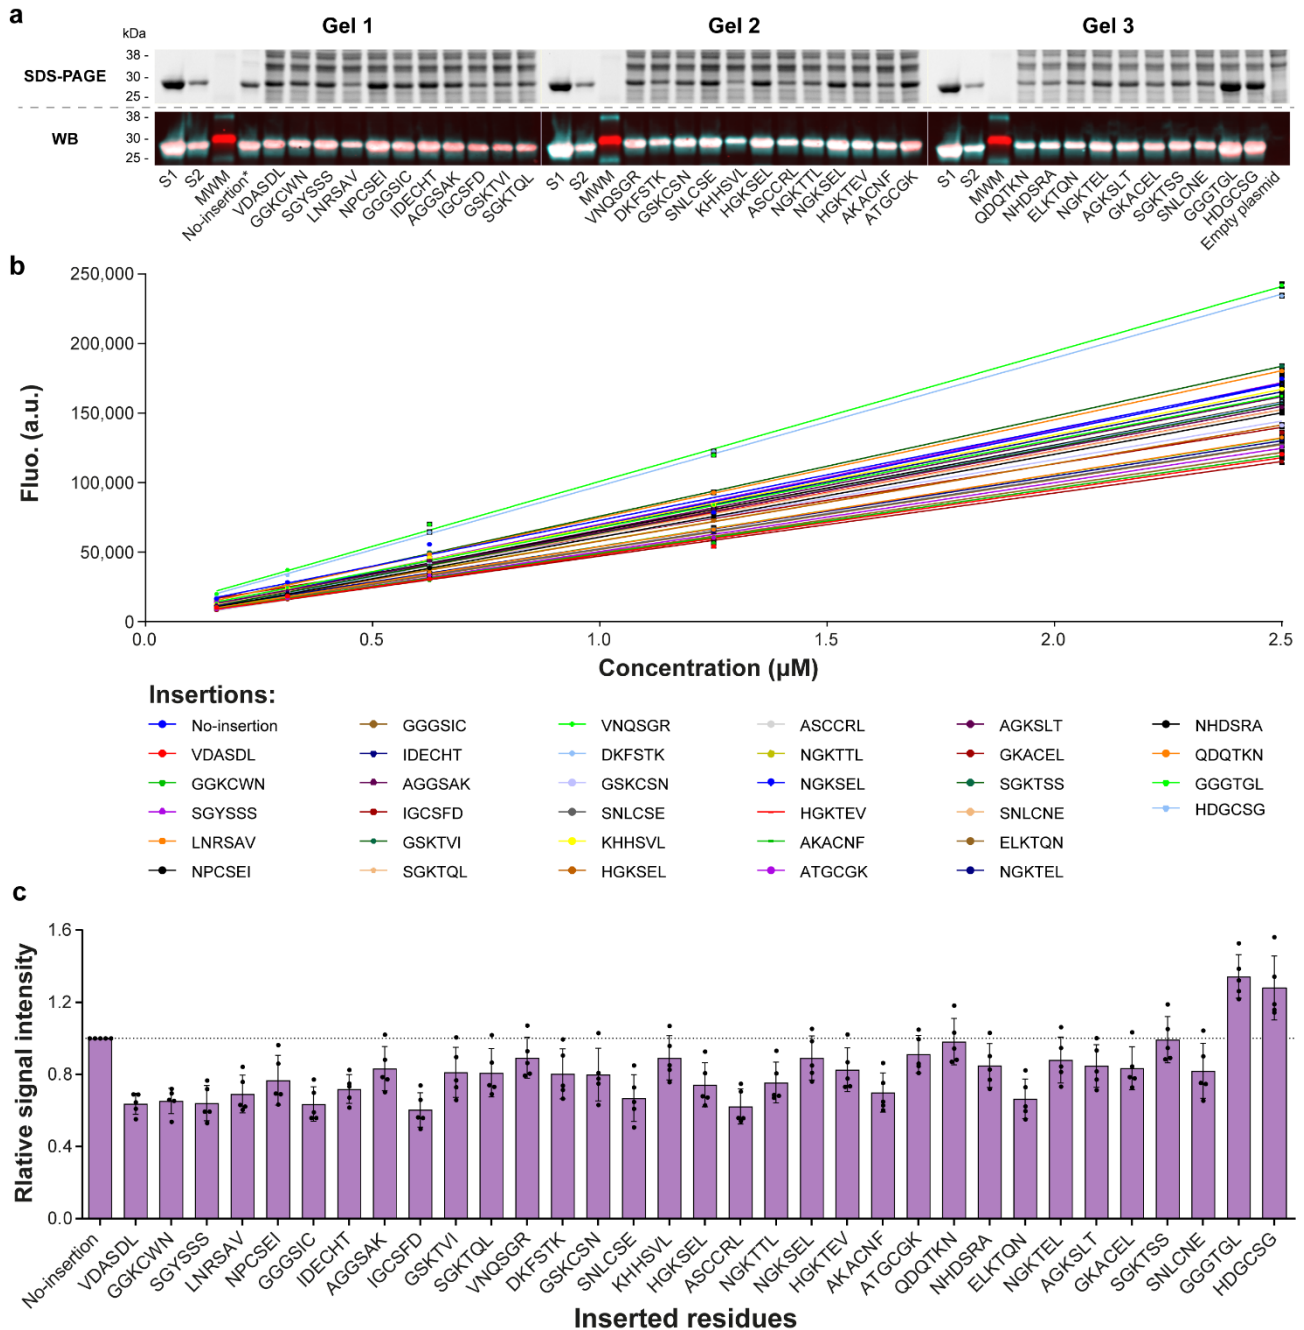

**Supplementary Figure 4 | *In vitro* analysis of mCherry insertion variants.** **a**, SDS-PAGE (top) and Western blot (bottom) analyses of lysates of *E. coli* cells expressing the native mCherry (no-insertion) or variants with the corresponding inserted amino acid residues between positions 159 and 160. Cells transformed with the corresponding empty plasmid were included as a control to validate the antibodies. Stain-free SDS-PAGE image was acquired prior to protein transfer. The red signal in the Western blots corresponds to the antibody recognizing the N-terminal of mCherry and the turquoise signal corresponds to the antibody recognizing the hexahistidine-tag ( $H_6$ ) at the C-terminus. The overlap of both signals (white) corresponds to native mCherry or variants. \* - the no-insertion sample was diluted 10-fold before loading the gel; S1 and S2 – standards of 5 pmol and 2.5 pmol of purified mCherry, respectively; MWM – molecular weight marker. **b**, Blank subtracted fluorescence (Fluo.) of 2-fold dilution series of cell lysates normalized the same concentration. Symbols represent the mean of three independent repeats ( $n = 3$ ), error bars correspond to s.d. and the solid lines represent linear regressions (all  $R^2$  values are above 0.988). **c**, Relative fluorescence intensities of mCherry insertion variants. For each dilution in **b**, Fluo. values were normalized to the no-insertion control and averaged. Bars represent the mean of the calculated relative signal intensities ( $n = 5$ ) and error bars correspond to s.d. Source data are provided as a Source Data file.

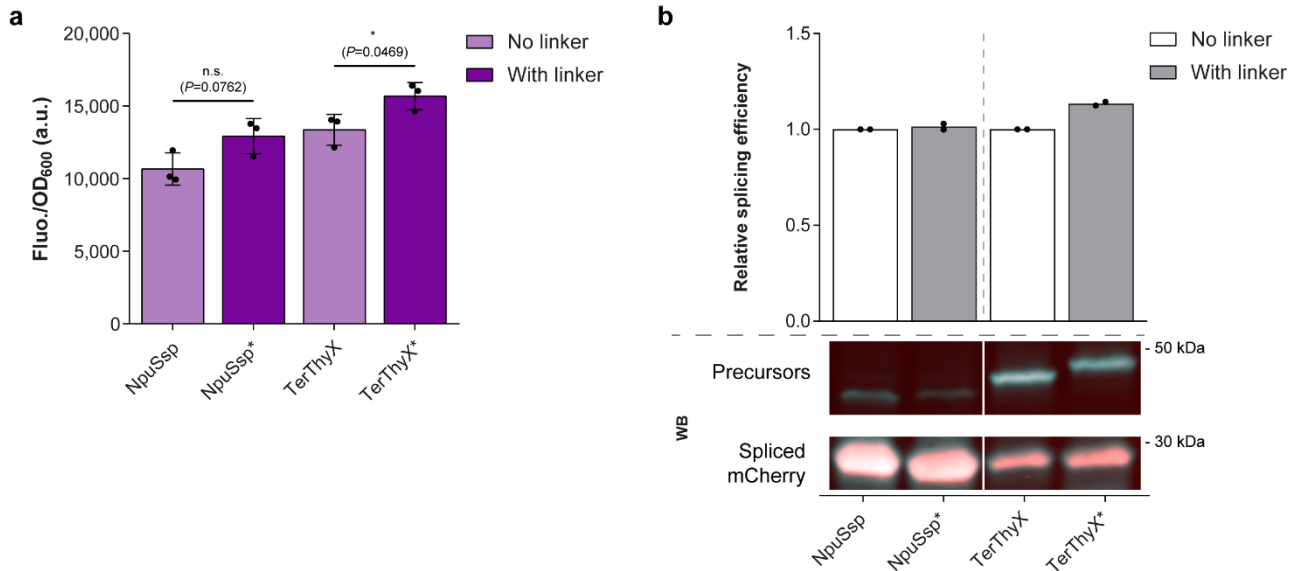

**Supplementary Figure 5 | Effect of linker addition in NpuSsp and TerThyX cis-splicing activity. a,** Background subtracted fluorescence (Fluo.) of *E. coli* cells expressing the mCherry-intein fusion proteins with (\*) or without a flexible linker inserted at the canonical endonuclease insertion site. Fluorescence was measured 7 h after induction (5 h of growth followed by 2 h incubation after chloramphenicol addition) and normalized to the cell density (OD<sub>600</sub>). Bars represent the mean of three biological replicates ( $n = 3$ ) and error bars correspond to s.d. **b,** The relative splicing efficiency (top) as calculated from Western blot analysis (bottom). For each sample in **a**, the three biological replicates were mixed and analyzed by Western blot. The red signal corresponds to the antibody recognizing the N-terminal of mCherry and the turquoise signal corresponds to the antibody recognizing the hexahistidine-tag (H<sub>6</sub>) at the C-terminus. The overlap of both signals (white) corresponds to the precursor proteins or to the spliced proteins. The relative splicing efficiency (Eff) was calculated for each antibody signal by dividing the signal intensity (SI) corresponding to the spliced products (Spl) by the sum of the signal from the precursors (Pre) and spliced products ( $\text{Eff} = \text{SI}_{\text{Spl}} / (\text{SI}_{\text{Spl}} + \text{SI}_{\text{Pre}})$ ). Bars represent the mean of the calculated relative efficiencies ( $n = 2$ ). Statistical differences in **a**, were determined for each intein, between the two groups (with linker/no linker) by means of two-tailed Student's *t* tests (\* $P=0.0469$ ; n.s. non-significant,  $P=0.0762$ ). Source data and detailed statistical analyses are provided as a Source Data file.

**a**

```
Conservation:      5      5 7          5          5
M86                1  CISGDSLISLA-----STG-----KRVPIKDLLGE-----KDFEIIWAINEQTMKLES AKVSRVFC TG 52
NpuSsp             1  CLSYETEILITV-----EYG-----SLPIGKIVEK-----RIECTVYSVDNNG-NIYTPQVVAQWHD RG 51
gp41-1            1  CLDLKTVQVTPQ-----G-----MKEISNIQ-----VGDLVLSNTGY-----NEVLNVFPKS 42
gp41-8            1  CLSLDTMVTVTG-----K-----AIEIRDVK-----VGDLVLESEC-----PVQVTEVLPII 42
NrdJ-1            1  CLVGSSEIITR-----NYG-----KTTIKKVEVVEIF-----DNDKN-----IQVLAINTHTDNI EWAFIKAAQLTR 53
IMPDH-1          1  CFVPGTLVNTEN-----G-----LKKIEEIK-----VGDKVFSHTGK-----LQEVVDTLIFD 45
SspDnaX           1  CLTGDGQVLTNR-----G-----LMSIDNPFQI-----KGREVLVSNETLQQWYKVKVLRWLD RG 49
SspGyrB          1  CFSGDTLVALT D-----G-----RSVSFEQLV-----EEEEKQGRQNFICYTIRHDGSGI VGEKIINARKTKT 55
TerThyX          1  CLSNTKVRFRYSSSSQEAKEYEETIEKLANLWHYGSKNQYTSKDAKCMQENI-----SSRNIFTLDTQTNI VSSKITNRYING 80
TvoVMA           1  CVSGTEPVVYLD-----G-----KTIKIKDLYSSEKKEKEDN--IVEAGSGEEI IHLKDPDIQIYSYVDG--TIVRSRSLRYLKGK 70
PhoRadA          1  CFARDTEVYVE-----NDT-----VPHMESIEEMYSKYASM--NGELPFDNGYAVPLDNV FVYVTLDIASGEIKKTRASYIYREK 72
Ama-Ter          1  NIAHSTPVLTA-----NRG-----WVTHGDLV-----PGDQVFPSPGK-----PVDVLALSDEA 44
Cth-Ter          1  QLALDTPIPTPD-----G-----WTFMGIK-----AGDKVIDEKGR-----PCNVVAISEID 43
LLP-Pol          1  CFSGDEIILTPY-----G-----WVKFEDYD-----ESMCAQYDEVTKGISFTYPNETIHLK 48
LP-Hel           1  CHAYGHDIMSD-----G-----TKKQVQDIA-----VGDKVMGPDGN-----PRKVIRLVKG- 43
MP-B-DnaB        1  PLALNTEVPTPS-----G-----WTVVGDLS-----VG DYVLSGDDG-----PHRQRET PVL 43
MP-M-DnaB        1  ALDVETPILTGN-----G-----WKKMGDIQ-----VGDYVHAADGT-----LARVSYVSE RH 43
SaP-dpol         1  CLHRHTQVLT DG-----G-----FKDIMAVT-----STDKVWSGKWK-----VNTKGAHLMG 42
NrdA-2           1  CLTGDAKIDVLI-----DNIP I-----SQISLEEVV-----NLFNEGKEIYVLSYNDITK EVEYKEISDAGLIS 59
Mja-KIbA         1  ALAYDEPIYLS-----DGN-----IINIGEFVDKFKKPKYKNSIKKEDNGFGWIDIGNENIYIKSF NKLSLIEDKRILRVRRK 74
Consensus aa:    t.h.s.p.o.l.h.....s.....p.p.h.....s.bi.h.s.....h.h.....
Consensus ss:    eee eeehhh eeeee eeeeeeeeee
```

```
Conservation:      5      6      5 5 9
M86              53  --KKLVYTLK-TRLG--RTIKATANHRFLTIDG-----WKRLDE-----LSL-----KEHIA 94
NpuSsp           52  --EQEVFVYC-LEDG--SLIRATKDHKFMVTVDGQ-----MLPIDE-----IFE-----REL DL 94
gp41-1           43  --KKKSYKIT-LEDG--KEIICSEEHLPFTQTGE-----MNIISGG-----LKE-----GMCLY 85
gp41-8           43  --KQVPEIIV-LKSG--KKIRVSANHKFPPTKDGL-----KINSGG-----LKV-----GD FLR 85
NrdJ-1           56  PNAELVELE-IDTLHGVTIRCTPDHPVVTYKNRG-----VYRADE-----LTD-----DDELV 102
IMPDH-1          44  RDEEIIISI-----NGIDCTKNHEFVYIDKENANRVNEDNIHLFARWVHADE-----LDM-----KKHLL 97
SspDnaX          50  --EKQTLISIK--TKN--STVRC TANHLIRTEQG-----WTRAE N-----ITP-----GMKIL 90
SspGyrB          56  --NAKVIVT-LDNG--ESIIC TPDHKFMLRDG S-----YKCAMD-----LTL-----DDSLM 98
TerThyX          81  --EKETTYTIK-TVSG--KEIRATLEHQFMTNQG-----WKRLKD-----FNN-----STQIC 122
TvoVMA           71  --SSYLVRIR-IIGG--RSVSVTPVHKLFVLTTEKGI-----EEVMASN-----LKV-----GDMIA 116
PhoRadA          73  --VEKLEI EK-LSSG--YSLKVT PSHPVLLFRDGL-----QWVPAAE-----VKP-----GDVVV 117
Ama-Ter          45  --VDDYVVT-FTNG--EKIRCHANHEWTVYSRADKQ-----EKT VETKW-----FLENTNRGT PRSLTAGNR FQ 103
Cth-Ter          44  DTEQAYKIN-FRDG--TSIVAGERHLWKVQVTNNGR-----REKLLT TGE-----MYQKQFK-----TKSKENRAL 101
LLP-Pol          49  --DQDILWVY-EDTN--TSIHATGNHDILIQKPN-----GDI AKEPFSLNQLLQKGD-----KHIRP I 99
LP-Hel           44  --QDEMFRVT-PTKG--ESFVVNGGHILSLYQTPRRAGQ-----TPGYTEISVNE-----YIR-----SSSTF 96
MP-B-DnaB        44  EGLATYVVR-FDDG--TEITASASHGWTQRLTGHD-----SYETVTVTTEE-----LAQTVTN-----SKGRKRHR 103
MP-M-DnaB        44  --WRDCFSVQ-FADG--AELVASDHLWAVNDR LKG-----ERV IDTAE-----LYRTQTY-----GARGDRRYT 98
SaP-dpol         43  --WKPVINVD-----GVLMTEDHKILTHS-----WVQAKQ-----LVS-----NKYMDRALEIGMDAWLSCAS YQNDKAK 101
NrdA-2           60  ESAEVLIEDDETG--QKIVCTPDHKVYVTLNRG-----VYSAKD-----LKE-----DDELV 104
Mja-KIbA         75  YSGKLKIKIT-TKNR--REITLTHDPVVISK TGEV-----LEINAE M-----VKV-----GDYIY 121
Consensus aa:    ...hhpl..hps...ppl.h.s.H.h.h.p.....h.p.....h.....p.hh.....
Consensus ss:    eeeee e eeee eeee eeehhh eee
```

```
Conservation:      65 5 5 5 69
M86              95  -----LPRK---LE-----SSSLQLAPEIEKLPQSDIYWDPVIVSITETG-VEEVFDL-TVPG-LRNF-VAN--D--IIVHN 154
NpuSsp           95  -----MRVD--NLPN-----MVKVIGRRSLG-VQRI FDI-GLRQ-DHNF-LLA--NGATAAN 147
gp41-1           86  -----VKE-----LKKILKIEELD-ERELIDI-EVSG-NHLF-YAN--D--ILTHN 125
gp41-8           86  -----SRAK-----MCEIFENEIDWDEIASIEYVGV-VEETIDI-NVTN-DRLF-FAN--G--LLTHN 134
NrdJ-1           103  -----VAI-----MEAKTYIGKIKSRKIVS-NEDTYDI-QTS--THNF-FAN--D--ILVHN 145
IMPDH-1          98  -----IELE-----MKFKLKEITSIETKH YKGVHDL-TVNQ-DHSY-NVR--G-TVVHN 141
SspDnaX          91  -----SPA-----PQWHTNFEEVESVTKGQ-VEKVYDL-EVED-NHNF-VAN--G--LLVHN 134
SspGyrB          99  -----PLHR--KISTEDSGHA-----MEAVL-----NYNHRIVNI EA VSETIDVYDI-EVPH-THNFALAS--G--VFNHN 157
TerThyX          123  -----EVQL--A-----GVFVIEIESIEKFG-KEIT YDL-EVEHPEHNF-IAN--G--LVVHN 175
TvoVMA           117  -----AVAE--SESEARDCGMSEECV-----MEAEVYTSLEATFDRVKS IAYEKGD FVYD L-SVPEYGRNF-IGGEG L-LVLHN 186
PhoRadA          118  -----GVRE--EVLRR-----RIISKGELEFHEVSSVRIIDYNNWYD L-VIPE-THNF-IAPN-G--LVLHN 172
Ama-Ter          104  -----FOVP--KTNALE-----ERRVSIKVEYL PNGEKHC I-QVDSPDGLY-LVG--KKLVATHN 164
Cth-Ter          102  -----FRIP--IADAFI-----SHFHYIKSIEKTG-CTKMRCI-QVDSPSRLY-LAG--KSMIPTHN 161
LLP-Pol          100  -----NAGY--VDSAEVDTLMQRLV-----SFPGKAFPTGPSPY-KGDVYCV-NVPT--HNI VIRHN-DKVS I QGN 158
LP-Hel           97  -----KHSKLRQRFDP-----RVDVTGPKVEPIG-VGDY YGF-TV DG-DHLY-LDG--D-FVRHN 156
MP-B-DnaB        104  -----IPVV--GME-----SQHRWVESVTPVE-SVPVKCI-GIDTEDHLP-QVRSR--ILTHN 160
MP-M-DnaB        99  -----VTVP--EALD-----ARTNTITSVTPVP-TVETVCI-QIDHPSHVF-LAG--KSLTPTHN 156
SaP-dpol         102  DNYSSNVIVERC--LG-----NLNGKLT YCE-----PVYDLIDVEDGNRFL-IAS-DSGFLVATHN 162
NrdA-2           105  -----FS-----GLKIKRES-KEPVFDI-TVKD-NSNF-FAN--N--ILVHN 149
Mja-KIbA         122  -----IPKN--NT-----INLDEVIKVETVDYNGHIYDL-TVED-NHTY-IAGKNEG-FAVSN 178
Consensus aa:    .....pl..hp.....hshl.pl.p.s+.@.hsh.....hhhHN
Consensus ss:    ee eeeeeee eeee ee e ee
```

**b**

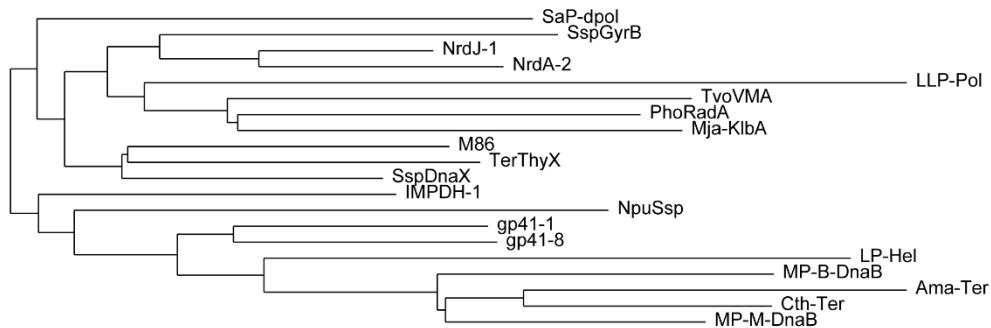

**Supplementary Figure 6 | Structural similarity of the inteins characterized.** **a**, Structural alignment of the multiple sequences of inteins without the endonuclease domains (mini-inteins), performed using PROMALS3D (see <http://prodata.swmed.edu/promals3d/promals3d.php> for output style). **b**, Phylogram of the inteins based on the alignment shown in **a**. The alignment to tree format conversion was performed using BioNJ and the phylogenetic tree was constructed using TreeDyn 198.3 (both available at the <http://www.phylogeny.fr/index.cgi>).



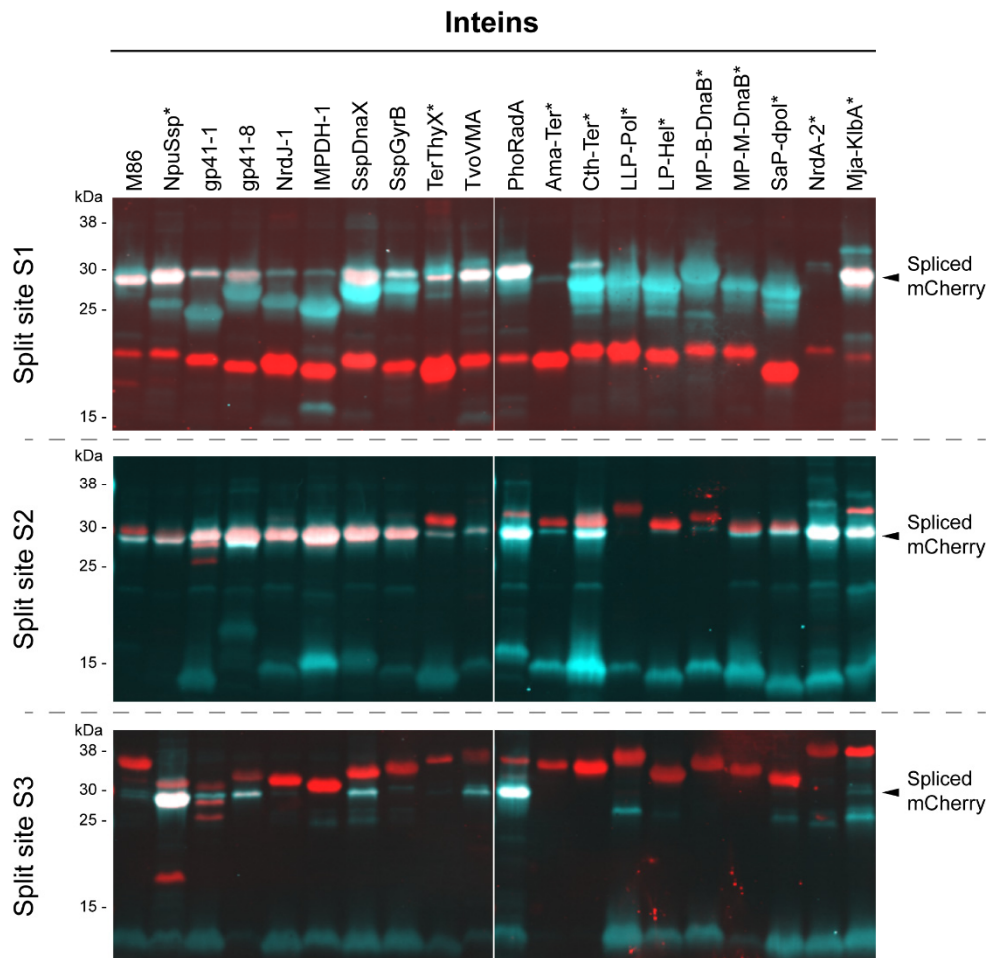

**Supplementary Figure 7 | Western blot analysis of *trans*-splicing of inteins split at different sites.** Samples from the three biological replicates of *E. coli* cells expressing chimeric mCherry halves fused to counterpart inteins split at the three different sites (S1, S2 and S3, shown in **Fig. 2b**) were mixed together and analyzed. The red signal corresponds to the antibody recognizing the N-terminal of mCherry and the turquoise signal corresponds to the antibody recognizing the hexahistidine-tag (H<sub>6</sub>) at the C-terminus. The overlap of both signals (white) corresponds to the spliced mCherry. Source data are provided as a Source Data file.

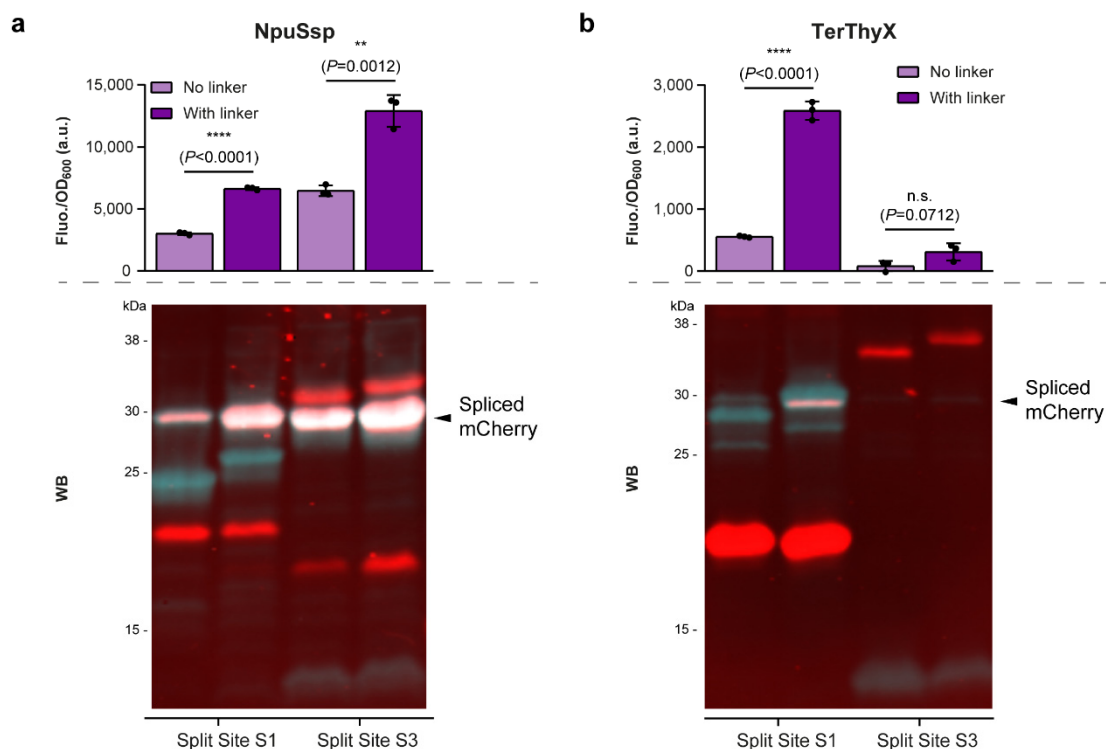

**Supplementary Figure 8 | Effect of linker addition in NpuSsp and TerThyX trans-splicing activity. a-b,** Background subtracted fluorescence (Fluo. top) and Western blot analysis (bottom) of *E. coli* cells expressing split mCherry proteins fused to NpuSsp (a) or TerThyX (b) split at the atypical sites S1 and S3, with or without a flexible linker inserted at the canonical endonuclease insertion site of the inteins. Fluorescence was measured 7 h after induction (5 h of growth followed by 2 h incubation after chloramphenicol addition) and normalized to the cell density (OD<sub>600</sub>). Bars in a and b represent the mean of three biological replicates ( $n = 3$ ) and error bars correspond to s.d. For each sample, the three biological replicates were mixed and analyzed by Western blot. The red signal in Western blots corresponds to the antibody recognizing the N-terminal of mCherry and the turquoise signal corresponds to the antibody recognizing the hexahistidine-tag (H<sub>6</sub>) at the C-terminus. The overlap of both signals (white) corresponds to the spliced mCherry. Statistical differences were determined for each intein, between the two groups (with linker/no linker) by means of two-tailed Student's *t* tests (\*\* $P=0.0012$ ; \*\*\*\* $P\leq 0.0001$ ; n.s. non-significant,  $P=0.0712$ ). Source data and detailed statistical analyses are provided as a Source Data file.

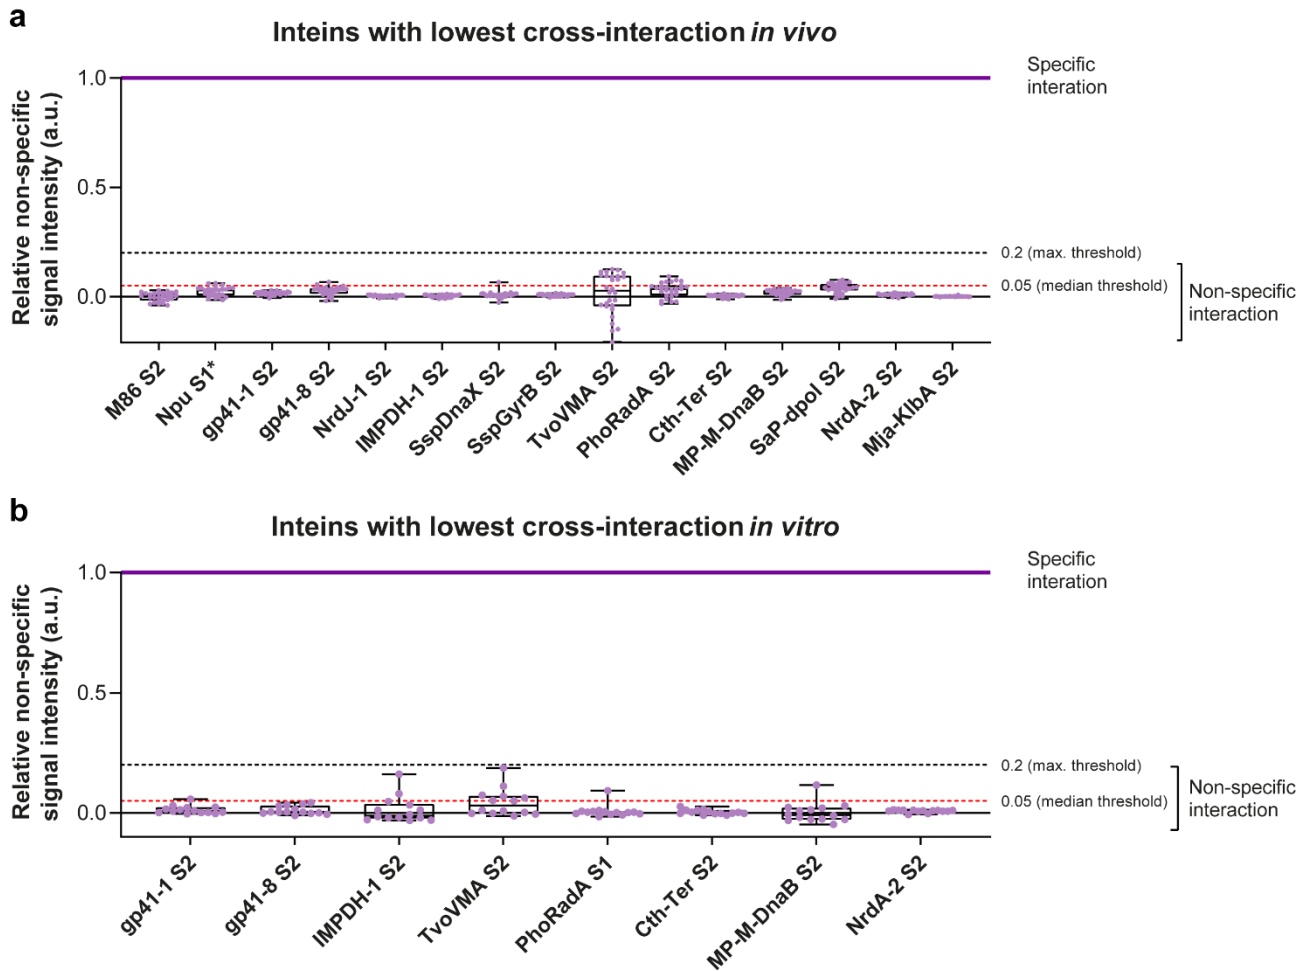

**Supplementary Figure 9 | Highly orthogonal split inteins.** Relative non-specific signal intensities for the split inteins exhibiting the lowest mutual cross-interaction *in vivo* (a) and *in vitro* (b). The relative fluorescence values of non-specific intein halves combinations were calculated for each intein using the specific fluorescence as reference. The average Fluo./OD<sub>600</sub> (a) or Fluo. (b) values from Supplementary Data 1 and 2 were respectively used for calculations. For *in vivo* conditions  $n = 28$  non-specific interactions and for *in vitro* conditions  $n = 14$  non-specific interactions. Two thresholds were set to define the low degree of mutual cross-interaction: 0.05 (dashed red line) as the maximum for the median value and 0.2 (dashed black line) as the maximum for any individual value. The purple line corresponds to the specific interaction value of 1.0. For box-and-whisker plots, the center, boxes and whiskers represent the median, interquartile range, and the maximum to minimum range, respectively. Source data are provided as a Source Data file.



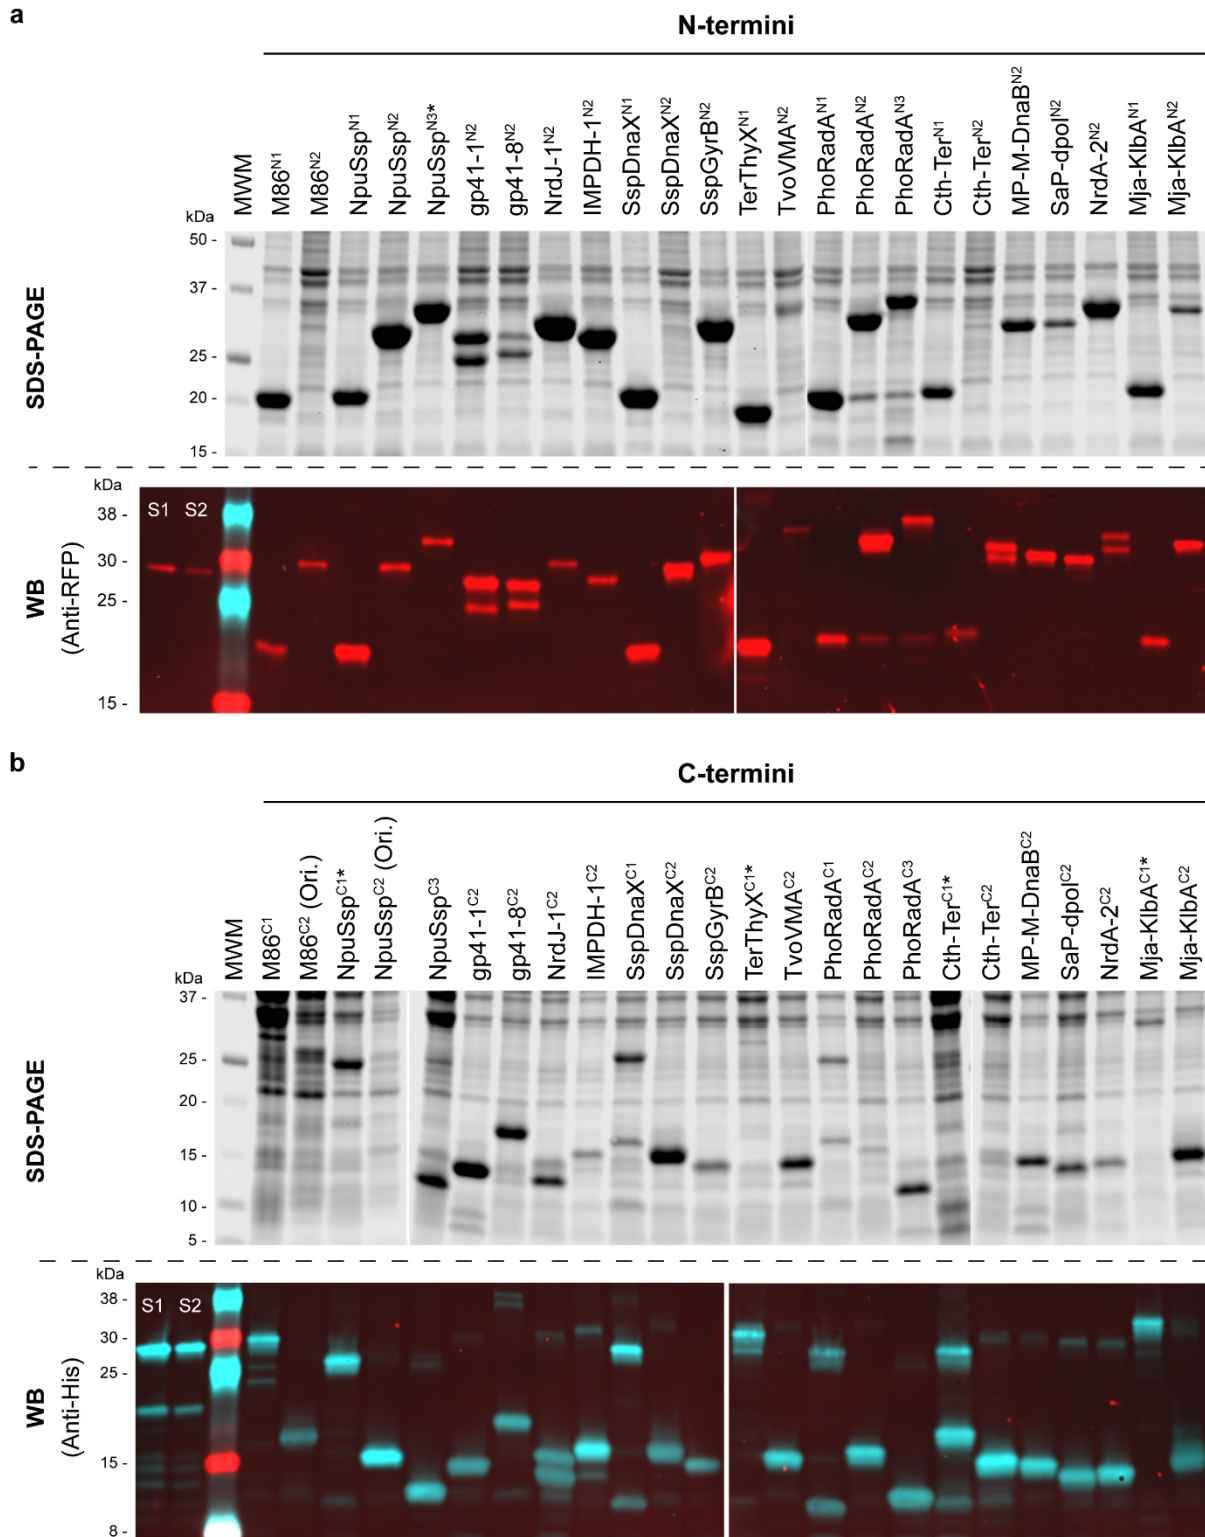

**Supplementary Figure 11 | Analysis of split mCherry-split intein chimeric proteins extracted under mild denaturing conditions.** a-b, SDS-PAGE (top) and Western blot (bottom) analyses of cell lysates of *E. coli* TOP10 or Origami cells expressing N-terminal (a) or C-terminal (b) mCherry chimeric proteins fused to inteins split at sites S1 (N1 and C1), S2 (N2 and C2) and S3 (N3 and C3), prepared under mild denaturing conditions. In the Western blots, the red signal corresponds to the antibody recognizing the N-terminus of mCherry (a) and the turquoise signal corresponds to the antibody recognizing the hexahistidine-tag (H<sub>6</sub>) at the C-terminus (b). S1 and S2 – standards of 2.5 pmol and 1.25 pmol of purified mCherry, respectively; MWM - molecular weight marker. Ori. - *E. coli* Origami; \* - Inteins with a flexible linker at the canonical split site. The proteins' theoretical molecular weights can be found in **Supplementary Table 9**. Protein gel images and blots are representative of at least two independent experiments with similar results. Source data are provided as a Source Data file.

| M86 S1     |     |     |     |     |     |     |
|------------|-----|-----|-----|-----|-----|-----|
| pH         | 8   |     |     | 9   |     |     |
| NaCl (mM)  | 100 | 300 | 500 | 100 | 300 | 500 |
| 4 °C       | 5   | 5   | 9   | 2   | 0   | -2  |
| 21 °C (RT) | 70  | 90  | 79  | 72  | 100 | 88  |
| 30 °C      | 31  | 55  | 52  | 27  | 54  | 48  |
| 37 °C      | 5   | 26  | 32  | 4   | 21  | 22  |
| 42 °C      | 1   | 2   | 4   | -2  | -1  | 4   |

| M86 S2     |     |     |     |     |     |     |
|------------|-----|-----|-----|-----|-----|-----|
| pH         | 8   |     |     | 9   |     |     |
| NaCl (mM)  | 100 | 300 | 500 | 100 | 300 | 500 |
| 4 °C       | 17  | 26  | 0   | 15  | -16 | -3  |
| 21 °C (RT) | 26  | 26  | 31  | 25  | 49  | 50  |
| 30 °C      | 61  | 74  | 84  | 48  | 96  | 100 |
| 37 °C      | -18 | -18 | -17 | -7  | 16  | 11  |
| 42 °C      | -25 | -17 | -22 | -24 | -22 | -32 |

| NpuSsp S1* |     |     |     |     |     |     |
|------------|-----|-----|-----|-----|-----|-----|
| pH         | 8   |     |     | 9   |     |     |
| NaCl (mM)  | 100 | 300 | 500 | 100 | 300 | 500 |
| 4 °C       | 1   | 1   | 0   | 1   | -1  | -1  |
| 21 °C (RT) | 77  | 56  | 42  | 70  | 30  | 21  |
| 30 °C      | 100 | 73  | 59  | 78  | 35  | 23  |
| 37 °C      | 100 | 86  | 78  | 56  | 34  | 25  |
| 42 °C      | 16  | 23  | 14  | 10  | 2   | 7   |

| NpuSsp S2  |     |     |     |     |     |     |
|------------|-----|-----|-----|-----|-----|-----|
| pH         | 8   |     |     | 9   |     |     |
| NaCl (mM)  | 100 | 300 | 500 | 100 | 300 | 500 |
| 4 °C       | 8   | 12  | 6   | 8   | 3   | -1  |
| 21 °C (RT) | 71  | 82  | 74  | 74  | 75  | 64  |
| 30 °C      | 91  | 85  | 84  | 75  | 64  | 61  |
| 37 °C      | 80  | 82  | 100 | 73  | 62  | 50  |
| 42 °C      | 27  | 24  | 20  | 29  | 17  | 8   |

| NpuSsp S3* |     |     |     |     |     |     |
|------------|-----|-----|-----|-----|-----|-----|
| pH         | 8   |     |     | 9   |     |     |
| NaCl (mM)  | 100 | 300 | 500 | 100 | 300 | 500 |
| 4 °C       | 3   | -1  | 6   | -2  | -7  | -10 |
| 21 °C (RT) | 61  | 36  | 35  | 100 | 36  | 33  |
| 30 °C      | 37  | 20  | 16  | 62  | 22  | 14  |
| 37 °C      | 9   | 2   | -3  | 5   | -3  | 3   |
| 42 °C      | -6  | -1  | -8  | -10 | -5  | -13 |

| gp41-1 S2  |     |     |     |     |     |     |
|------------|-----|-----|-----|-----|-----|-----|
| pH         | 8   |     |     | 9   |     |     |
| NaCl (mM)  | 100 | 300 | 500 | 100 | 300 | 500 |
| 4 °C       | 7   | 5   | 6   | 11  | 7   | 5   |
| 21 °C (RT) | 83  | 79  | 75  | 100 | 83  | 74  |
| 30 °C      | 91  | 80  | 75  | 100 | 86  | 77  |
| 37 °C      | 85  | 79  | 72  | 91  | 81  | 65  |
| 42 °C      | 26  | 31  | 22  | 44  | 24  | 25  |

| gp41-8 S2  |     |     |     |     |     |     |
|------------|-----|-----|-----|-----|-----|-----|
| pH         | 8   |     |     | 9   |     |     |
| NaCl (mM)  | 100 | 300 | 500 | 100 | 300 | 500 |
| 4 °C       | 9   | 7   | 4   | 10  | 4   | 1   |
| 21 °C (RT) | 78  | 70  | 60  | 87  | 74  | 60  |
| 30 °C      | 87  | 80  | 71  | 100 | 85  | 68  |
| 37 °C      | 82  | 72  | 60  | 95  | 74  | 56  |
| 42 °C      | 29  | 26  | 18  | 41  | 23  | 18  |

| NrdJ-1 S2  |     |     |     |     |     |     |
|------------|-----|-----|-----|-----|-----|-----|
| pH         | 8   |     |     | 9   |     |     |
| NaCl (mM)  | 100 | 300 | 500 | 100 | 300 | 500 |
| 4 °C       | 14  | 12  | 16  | 13  | 6   | 6   |
| 21 °C (RT) | 100 | 82  | 84  | 90  | 64  | 67  |
| 30 °C      | 67  | 59  | 59  | 70  | 58  | 54  |
| 37 °C      | 52  | 46  | 42  | 55  | 51  | 46  |
| 42 °C      | 12  | 23  | 15  | 30  | 18  | 16  |

| IMPDH-1 S2 |     |     |     |     |     |     |
|------------|-----|-----|-----|-----|-----|-----|
| pH         | 8   |     |     | 9   |     |     |
| NaCl (mM)  | 100 | 300 | 500 | 100 | 300 | 500 |
| 4 °C       | 10  | 10  | 11  | 14  | 11  | 8   |
| 21 °C (RT) | 71  | 75  | 75  | 100 | 96  | 94  |
| 30 °C      | 75  | 71  | 64  | 93  | 86  | 79  |
| 37 °C      | 70  | 66  | 61  | 80  | 77  | 64  |
| 42 °C      | 17  | 27  | 17  | 37  | 18  | 25  |

| SspDnaX S1 |     |     |     |     |     |     |
|------------|-----|-----|-----|-----|-----|-----|
| pH         | 8   |     |     | 9   |     |     |
| NaCl (mM)  | 100 | 300 | 500 | 100 | 300 | 500 |
| 4 °C       | 1   | 2   | 3   | 2   | -1  | -1  |
| 21 °C (RT) | 75  | 27  | 21  | 100 | 24  | 19  |
| 30 °C      | 50  | 24  | 15  | 64  | 21  | 14  |
| 37 °C      | 25  | 13  | 9   | 22  | 7   | 7   |
| 42 °C      | 2   | 2   | 1   | 6   | -3  | 0   |

| SspDnaX S2 |     |     |     |     |     |     |
|------------|-----|-----|-----|-----|-----|-----|
| pH         | 8   |     |     | 9   |     |     |
| NaCl (mM)  | 100 | 300 | 500 | 100 | 300 | 500 |
| 4 °C       | 7   | 10  | 9   | 13  | -10 | -6  |
| 21 °C (RT) | 89  | 95  | 93  | 98  | 100 | 94  |
| 30 °C      | 87  | 90  | 85  | 87  | 90  | 87  |
| 37 °C      | 75  | 82  | 79  | 75  | 74  | 66  |
| 42 °C      | 13  | 17  | 13  | 33  | 9   | 9   |

| SspGyrB S2 |     |     |     |     |     |     |
|------------|-----|-----|-----|-----|-----|-----|
| pH         | 8   |     |     | 9   |     |     |
| NaCl (mM)  | 100 | 300 | 500 | 100 | 300 | 500 |
| 4 °C       | 8   | 5   | 5   | 10  | 6   | 4   |
| 21 °C (RT) | 72  | 70  | 66  | 84  | 77  | 73  |
| 30 °C      | 90  | 81  | 72  | 92  | 87  | 76  |
| 37 °C      | 92  | 86  | 77  | 100 | 97  | 74  |
| 42 °C      | 34  | 35  | 25  | 58  | 31  | 29  |

| TerThyX S1* |     |     |     |     |     |     |
|-------------|-----|-----|-----|-----|-----|-----|
| pH          | 8   |     |     | 9   |     |     |
| NaCl (mM)   | 100 | 300 | 500 | 100 | 300 | 500 |
| 4 °C        | 7   | -1  | -25 | -6  | -5  | -25 |
| 21 °C (RT)  | 94  | 65  | 68  | 100 | 86  | 74  |
| 30 °C       | 45  | 37  | 36  | 63  | 41  | 37  |
| 37 °C       | 16  | 17  | 4   | 33  | 25  | 14  |
| 42 °C       | 5   | 1   | 0   | -2  | 3   | -6  |

| TvoVMA S2  |     |     |     |     |     |     |
|------------|-----|-----|-----|-----|-----|-----|
| pH         | 8   |     |     | 9   |     |     |
| NaCl (mM)  | 100 | 300 | 500 | 100 | 300 | 500 |
| 4 °C       | -1  | 3   | -25 | 0   | -5  | -10 |
| 21 °C (RT) | 61  | 61  | 49  | 69  | 56  | 58  |
| 30 °C      | 93  | 75  | 72  | 96  | 77  | 64  |
| 37 °C      | 83  | 76  | 66  | 100 | 71  | 65  |
| 42 °C      | 13  | 17  | 9   | 26  | 16  | 16  |

| PhoRadA S1 |     |     |     |     |     |     |
|------------|-----|-----|-----|-----|-----|-----|
| pH         | 8   |     |     | 9   |     |     |
| NaCl (mM)  | 100 | 300 | 500 | 100 | 300 | 500 |
| 4 °C       | 2   | 0   | -4  | 0   | -1  | -1  |
| 21 °C (RT) | 50  | 27  | 19  | 34  | 15  | 9   |
| 30 °C      | 86  | 30  | 26  | 47  | 18  | 10  |
| 37 °C      | 100 | 51  | 27  | 52  | 18  | 12  |
| 42 °C      | 27  | 9   | 8   | 16  | 3   | 1   |

| PhoRadA S2 |     |     |     |     |     |     |
|------------|-----|-----|-----|-----|-----|-----|
| pH         | 8   |     |     | 9   |     |     |
| NaCl (mM)  | 100 | 300 | 500 | 100 | 300 | 500 |
| 4 °C       | -1  | 1   | 0   | 2   | 0   | 0   |
| 21 °C (RT) | 67  | 64  | 51  | 80  | 69  | 58  |
| 30 °C      | 98  | 78  | 69  | 100 | 88  | 70  |
| 37 °C      | 83  | 82  | 71  | 98  | 85  | 70  |
| 42 °C      | 30  | 23  | 20  | 40  | 22  | 19  |

| PhoRadA S3 |     |     |     |     |     |     |
|------------|-----|-----|-----|-----|-----|-----|
| pH         | 8   |     |     | 9   |     |     |
| NaCl (mM)  | 100 | 300 | 500 | 100 | 300 | 500 |
| 4 °C       | 0   | 1   | 0   | 2   | 1   | 1   |
| 21 °C (RT) | 84  | 47  | 43  | 65  | 26  | 21  |
| 30 °C      | 100 | 51  | 52  | 72  | 27  | 21  |
| 37 °C      | 68  | 35  | 27  | 47  | 14  | 11  |
| 42 °C      | 15  | 6   | 5   | 9   | 4   | 2   |

| Cth-Ter S1* |     |     |     |     |     |     |
|-------------|-----|-----|-----|-----|-----|-----|
| pH          | 8   |     |     | 9   |     |     |
| NaCl (mM)   | 100 | 300 | 500 | 100 | 300 | 500 |
| 4 °C        | 7   | 2   | -6  | -5  | 5   | -9  |
| 21 °C (RT)  | 100 | 76  | 75  | 94  | 41  | 39  |
| 30 °C       | 30  | 21  | 21  | 29  | 6   | 4   |
| 37 °C       | -10 | -12 | -23 | -6  | -21 | -3  |
| 42 °C       | -2  | 1   | -18 | -8  | -7  | 3   |

| Cth-Ter S2 |     |     |     |     |     |     |
|------------|-----|-----|-----|-----|-----|-----|
| pH         | 8   |     |     | 9   |     |     |
| NaCl (mM)  | 100 | 300 | 500 | 100 | 300 | 500 |
| 4 °C       | 3   | 2   | 2   | 5   | 2   | 0   |
| 21 °C (RT) | 85  | 85  | 67  | 100 | 94  | 64  |
| 30 °C      | 41  | 82  | 70  | 54  | 86  | 69  |
| 37 °C      | 5   | 22  | 29  | 6   | 26  | 29  |
| 42 °C      | 0   | 0   | 0   | 1   | 0   | 1   |

| MP-M-DnaB S2 |     |     |     |     |     |     |
|--------------|-----|-----|-----|-----|-----|-----|
| pH           | 8   |     |     | 9   |     |     |
| NaCl (mM)    | 100 | 300 | 500 | 100 | 300 | 500 |
| 4 °C         | 3   | 2   | 2   | 4   | 0   | -1  |
| 21 °C (RT)   | 73  | 54  | 46  | 100 | 65  | 50  |
| 30 °C        | 82  | 48  | 43  | 96  | 49  | 34  |
| 37 °C        | 9   | 2   | 1   | 10  | -2  | -1  |
| 42 °C        | 0   | -1  | -2  | 1   | 2   | 1   |

| SaP-dpol S2 |     |     |     |     |     |     |
|-------------|-----|-----|-----|-----|-----|-----|
| pH          | 8   |     |     | 9   |     |     |
| NaCl (mM)   | 100 | 300 | 500 | 100 | 300 | 500 |
| 4 °C        | 4   | 4   | 3   | 3   | 0   | -1  |
| 21 °C (RT)  | 84  | 100 | 97  | 72  | 73  | 80  |
| 30 °C       | 43  | 42  | 70  | 19  | 19  | 23  |
| 37 °C       | 2   | 6   | 10  | 1   | 3   | 1   |
| 42 °C       | -1  | -1  | -1  | 1   | 1   | 0   |

| NrdA-2 S2  |     |     |     |     |     |     |
|------------|-----|-----|-----|-----|-----|-----|
| pH         | 8   |     |     | 9   |     |     |
| NaCl (mM)  | 100 | 300 | 500 | 100 | 300 | 500 |
| 4 °C       | 9   | 6   | 5   | 9   | 7   | 4   |
| 21 °C (RT) | 75  | 74  | 69  | 100 | 90  | 86  |
| 30 °C      | 76  | 58  | 61  | 87  | 70  | 61  |
| 37 °C      | 57  | 46  | 37  | 58  | 32  | 26  |
| 42 °C      | 14  | 9   | 8   | 11  | 4   | 4   |

| Mja-KIbA S1* |     |     |     |     |     |     |
|--------------|-----|-----|-----|-----|-----|-----|
| pH           | 8   |     |     | 9   |     |     |
| NaCl (mM)    | 100 | 300 | 500 | 100 | 300 | 500 |
| 4 °C         | 3   | 9   | 10  | 7   | 3   | -1  |
| 21 °C (RT)   | 51  | 86  | 94  | 46  | 85  | 92  |
| 30 °C        | 63  | 99  | 100 | 40  | 98  | 94  |
| 37 °C        | 36  | 86  | 84  | 16  | 61  | 68  |
| 42 °C        | 9   | 23  | 30  | 7   | 13  | 19  |

| Mja-KIbA S2 |     |     |     |     |     |     |
|-------------|-----|-----|-----|-----|-----|-----|
| pH          | 8   |     |     | 9   |     |     |
| NaCl (mM)   | 100 | 300 | 500 | 100 | 300 | 500 |
| 4 °C        | -12 | -18 | -22 | -10 | -14 | -29 |
| 21 °C (RT)  | 87  | 67  | 70  | 100 | 54  | 60  |
| 30 °C       | 70  | 56  | 42  | 57  | 31  | 37  |
| 37 °C       | 63  | 81  | 67  | 73  | 57  | 49  |
| 42 °C       | 32  | 40  | 48  | 49  | 40  | 39  |

**Supplementary Figure 12 | Analysis of *in vitro* trans-splicing conditions.** Cell extracts of *E. coli* cells expressing matching N- or C-terminal mCherry chimeric proteins fused to inteins split at different sites (S1, S2 and S3) were mixed together and the effect of pH (8 or 9) and salt (100, 300 or 500 mM NaCl) on splicing was evaluated after 13 h incubation at 4 °C, room temperature (RT, 21 °C), 30 °C, 37 °C or 42 °C. Color gradient represents relative fluorescence intensities normalized to the maximum signal within each split intein matrix and is represented as percentage. Data represents mean values of two independent replicates (*n* = 2) and the normalized fluorescence values can be found in **Supplementary Data 3**. \* - Inteins with a flexible linker at the canonical endonuclease insertion site.

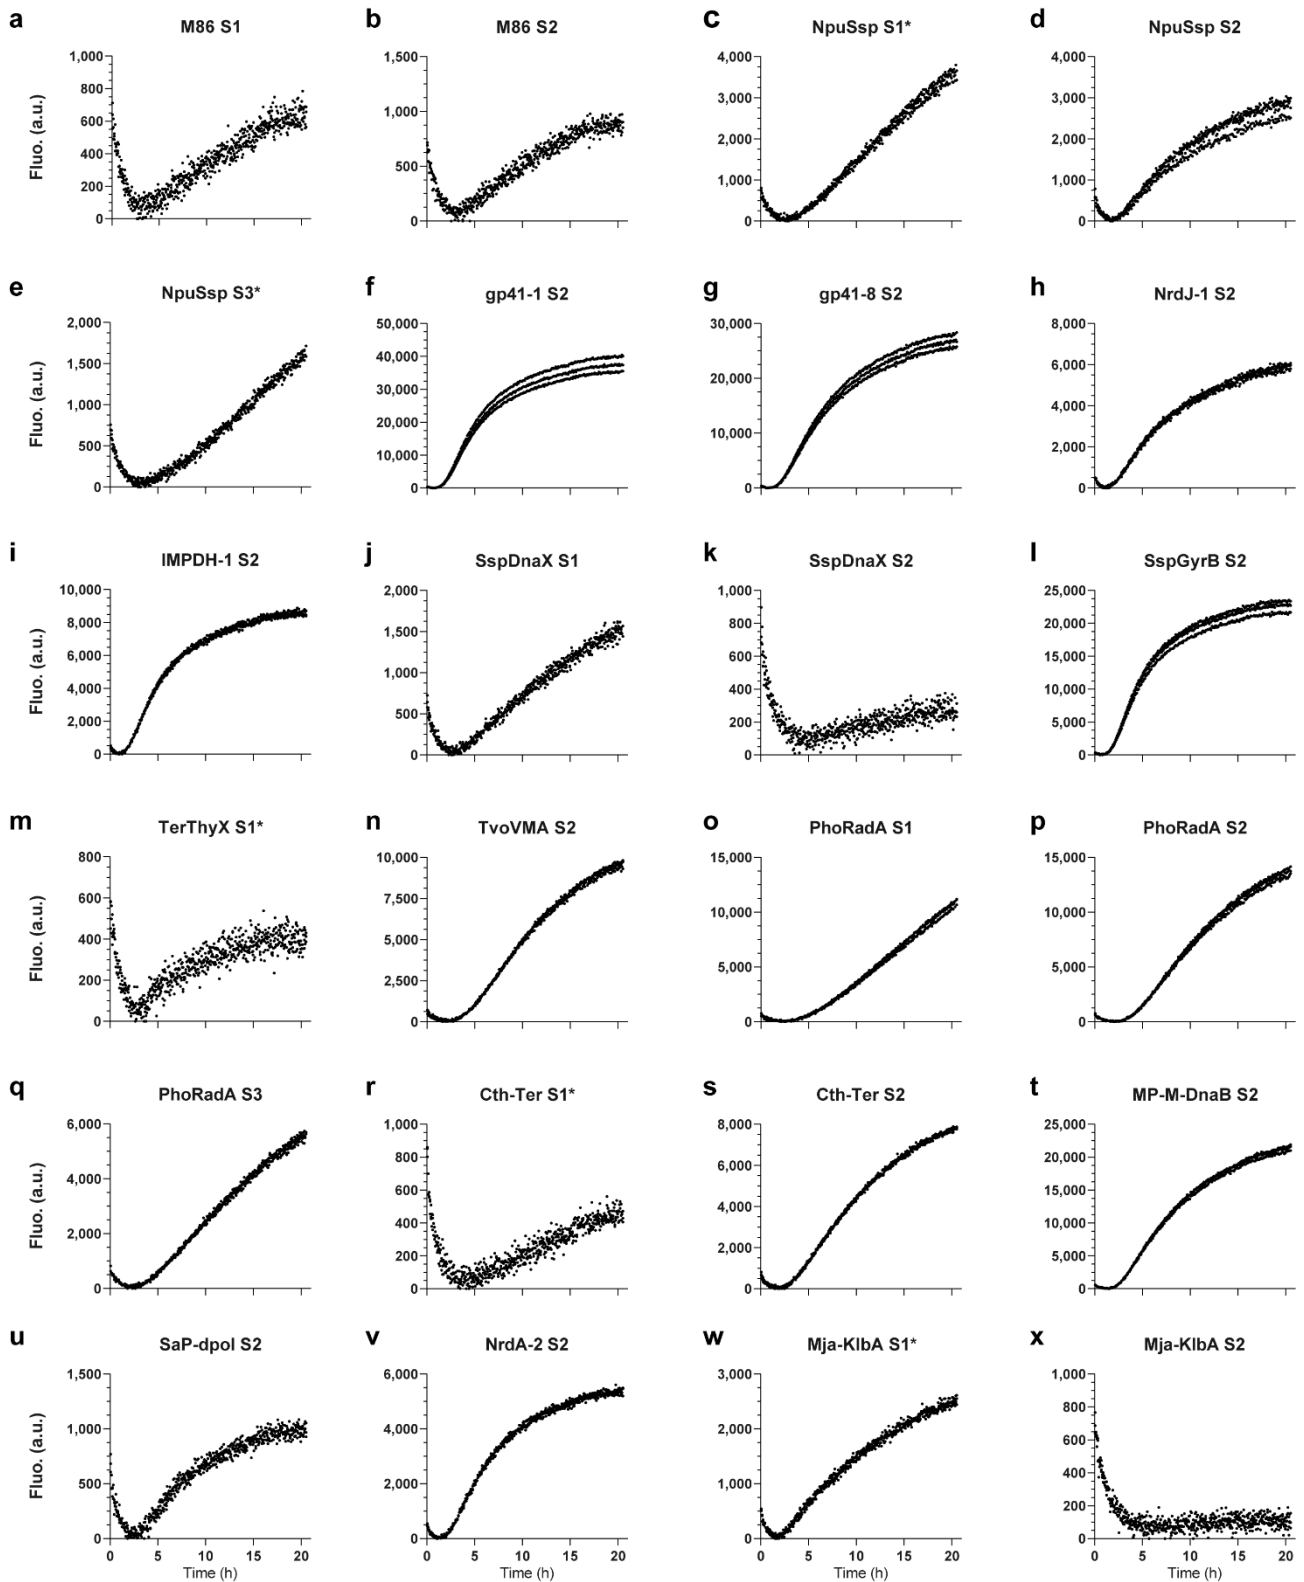

**Supplementary Figure 13 | Time course analysis of the *in vitro* trans-splicing of 24 split intein pairs.** Cell extracts of *E. coli* cells expressing matching N- or C-terminal mCherry chimeric proteins fused to inteins split at different sites (S1, S2 and S3) were mixed together in the same reaction buffer (100 mM Tris-HCL pH 9.0, 100 mM NaCl, 2 mM DTT) and incubated in a plate reader at room temperature for 20 h 30 min. Fluorescence (Fluo.) was measured every 5 min 24 s and data from three independent replicates are shown. Data was normalized by subtracting the lowest value measured for each well. \* - Inteins with a flexible linker at the canonical split site. Source data are provided as a Source Data file.

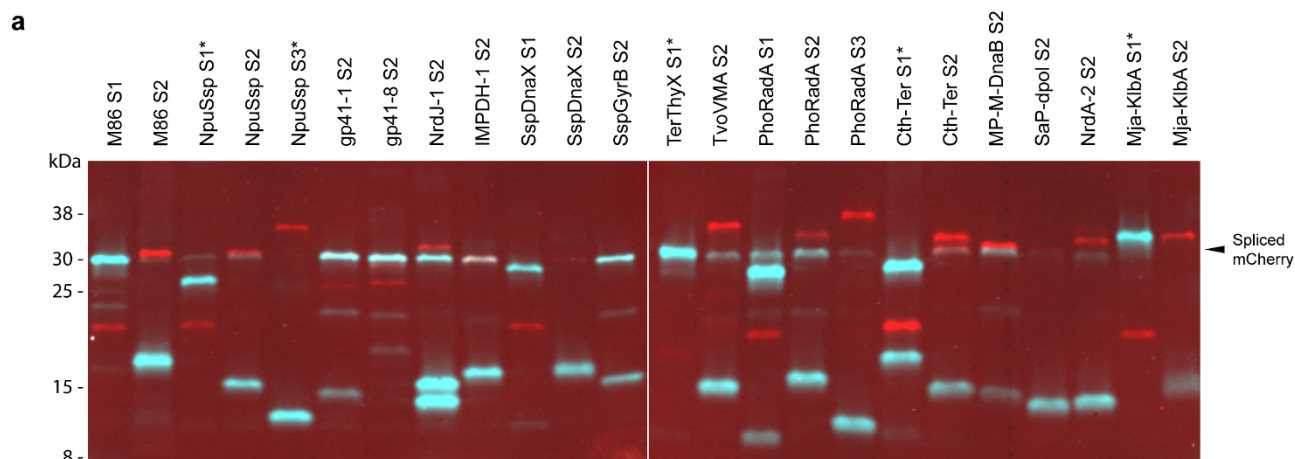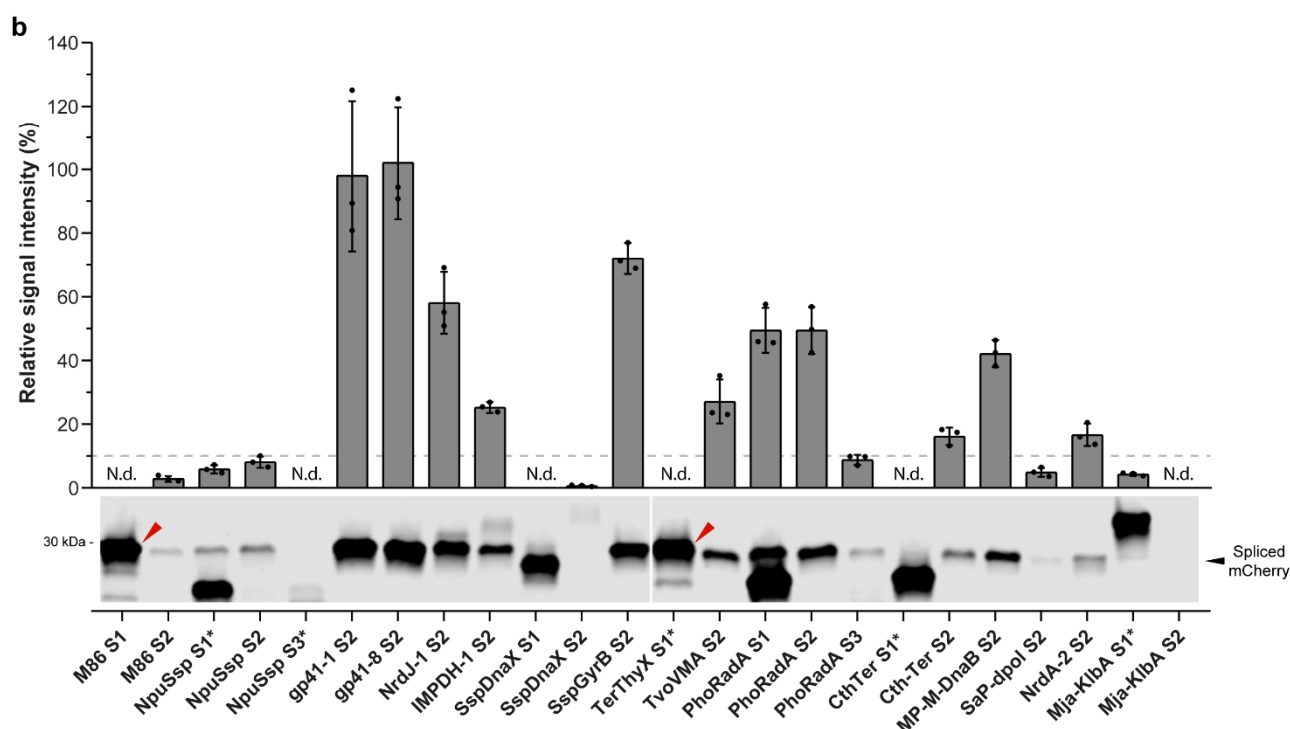

**Supplementary Figure 14 | End-point analysis of *in vitro* trans-splicing of 24 split intein pairs. a**, Western blot analysis of samples from **Supplementary Figure 13**, collected after 20 h 30 min of incubation. The red signal corresponds to the antibody recognizing the N-terminal of mCherry and the turquoise signal corresponds to the antibody recognizing the hexahistidine-tag (H<sub>6</sub>) at the C-terminus. The overlap of both signals (white) corresponds to the spliced mCherry. **b**, Relative spliced mCherry signal intensities (top) as detected by Western blot (bottom). The signal intensities of bands detected with the anti-H<sub>6</sub> antibody were quantified and normalized to the highest signal for each replicate series. Bars represent the mean of the calculated relative signal intensities of the three independent replicates ( $n = 3$ ) and error bars correspond to s.d. The gray dashed line shows a relative signal intensity of 10%. Red arrowheads indicate bands at the same position as the spliced product but that correspond only to the C-terminal chimeric protein since no signal from the N-terminal of mCherry could be detected. Source data are provided as a Source Data file.



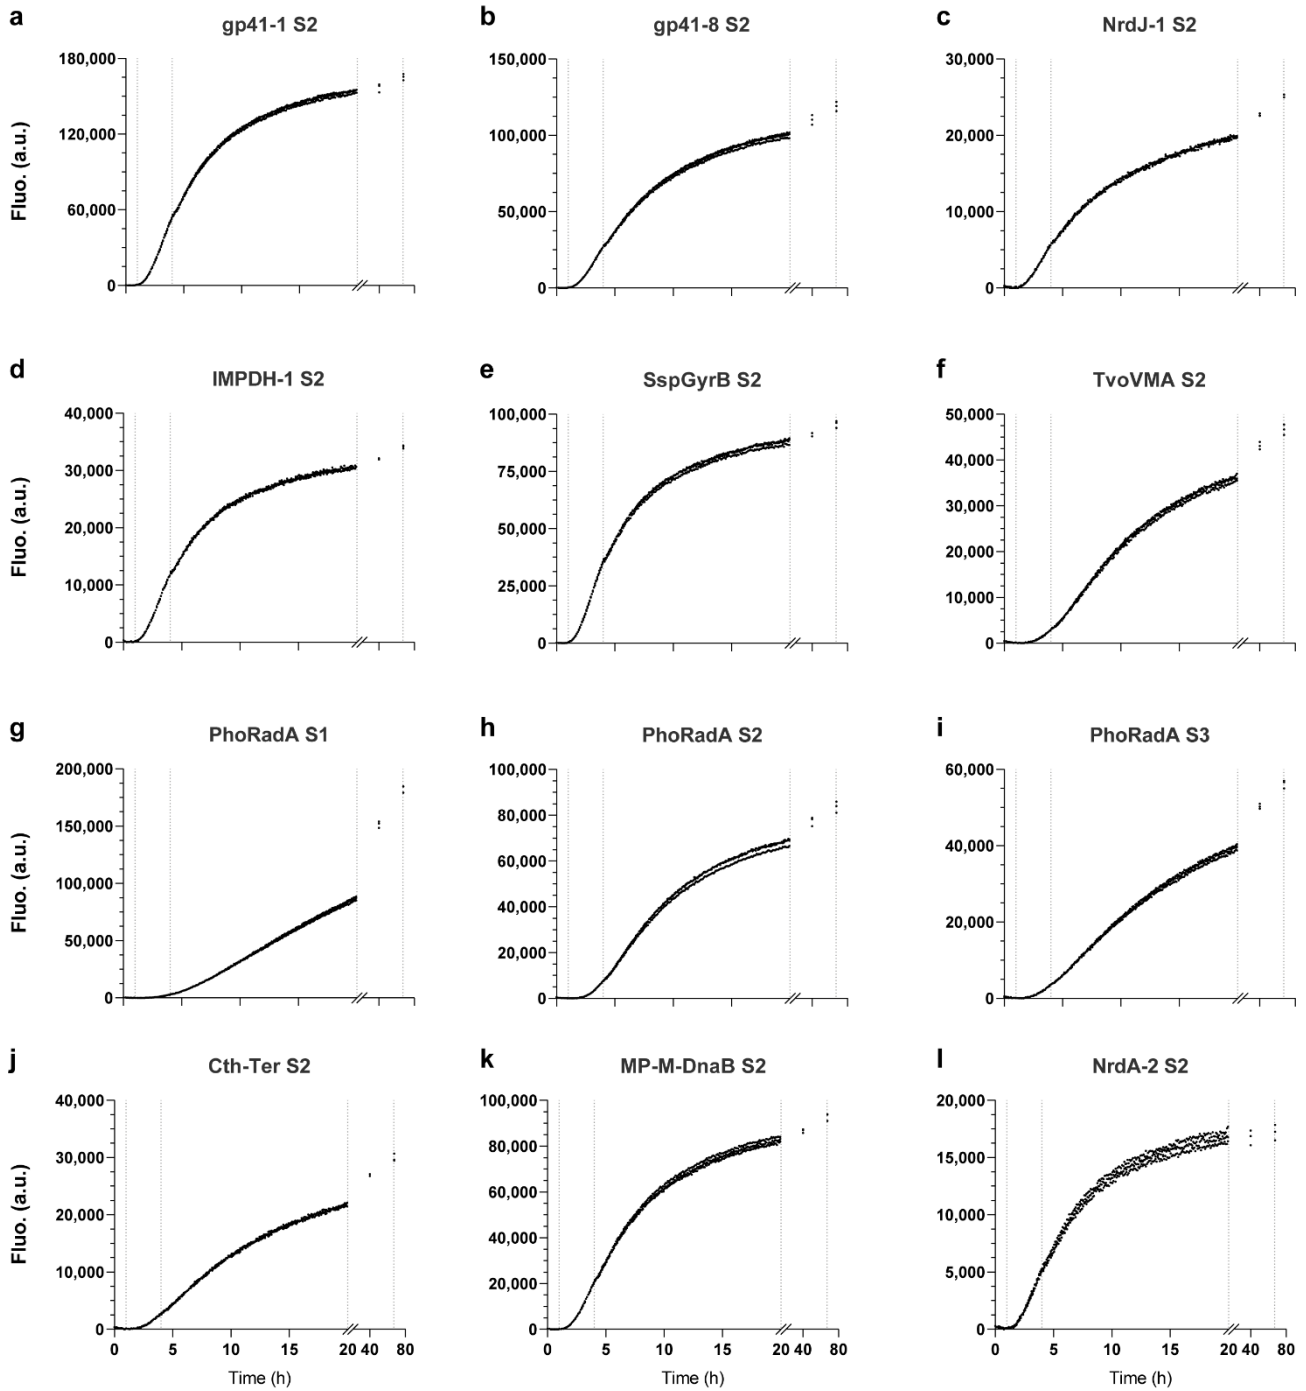

**Supplementary Figure 15 | Time course analysis of the *in vitro* trans-splicing of the 12 most active inteins.** Cell extracts of *E. coli* cells expressing matching N- or C-terminal mCherry chimeric proteins fused to inteins split at site S2 were mixed together in the same reaction buffer (100 mM Tris-HCL pH 9.0, 100 mM NaCl, 2 mM DTT) and incubated in a plate reader at room temperature for 67 h. Fluorescence (Fluo.) was measured every 5 min 24 s and data from three independent replicates are shown. Data was normalized by subtracting the lowest value measured for each well. Samples for Western blot analysis were collected after 1, 4, 20 and 67 h of incubation (dashed lines). Source data are provided as a Source Data file.



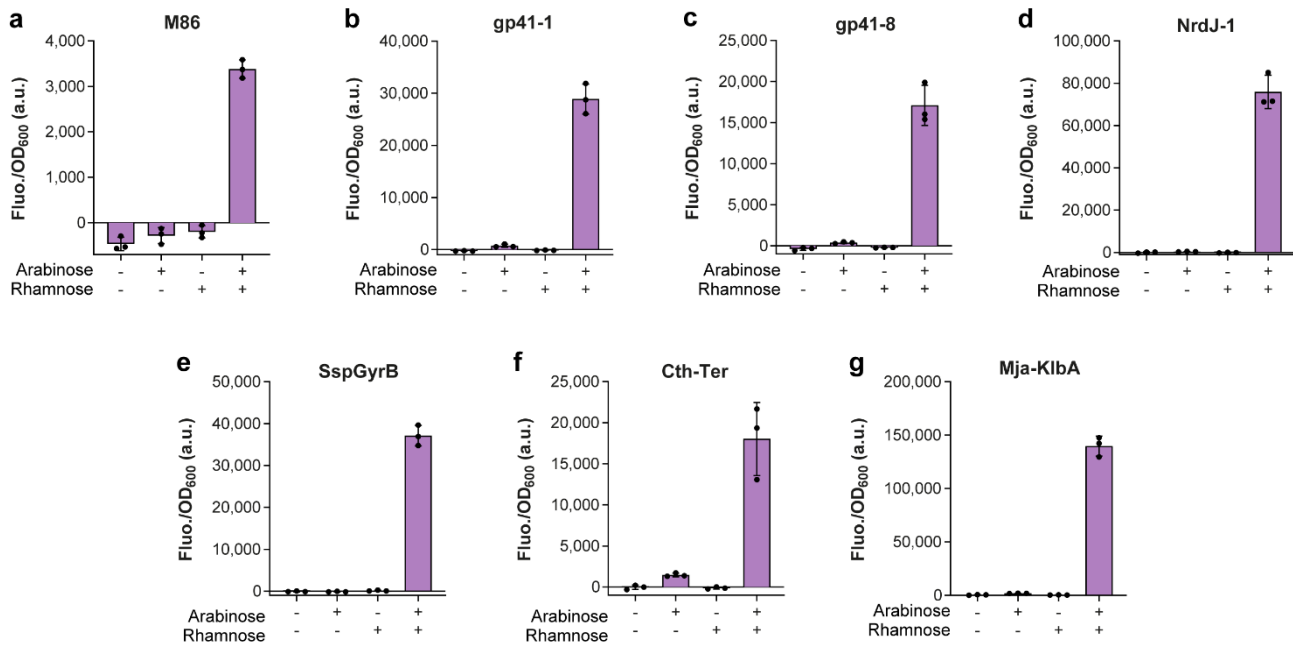

**Supplementary Figure 17 | Split mCherry-split intein-based logic AND gates.** a-g, Background subtracted fluorescence (Fluo.) of *E. coli* cells harboring the genetic circuits for split mCherry-split intein chimeric proteins, in the absence (-) or presence (+) of inducers (same cultures as in Fig. 4). Fluorescence was measured after overnight growth and it was normalized to the cell density (OD<sub>600</sub>). Bars represent the mean of three biological replicates ( $n = 3$ ) and error bars correspond to s.d. Source data are provided as a Source Data file.

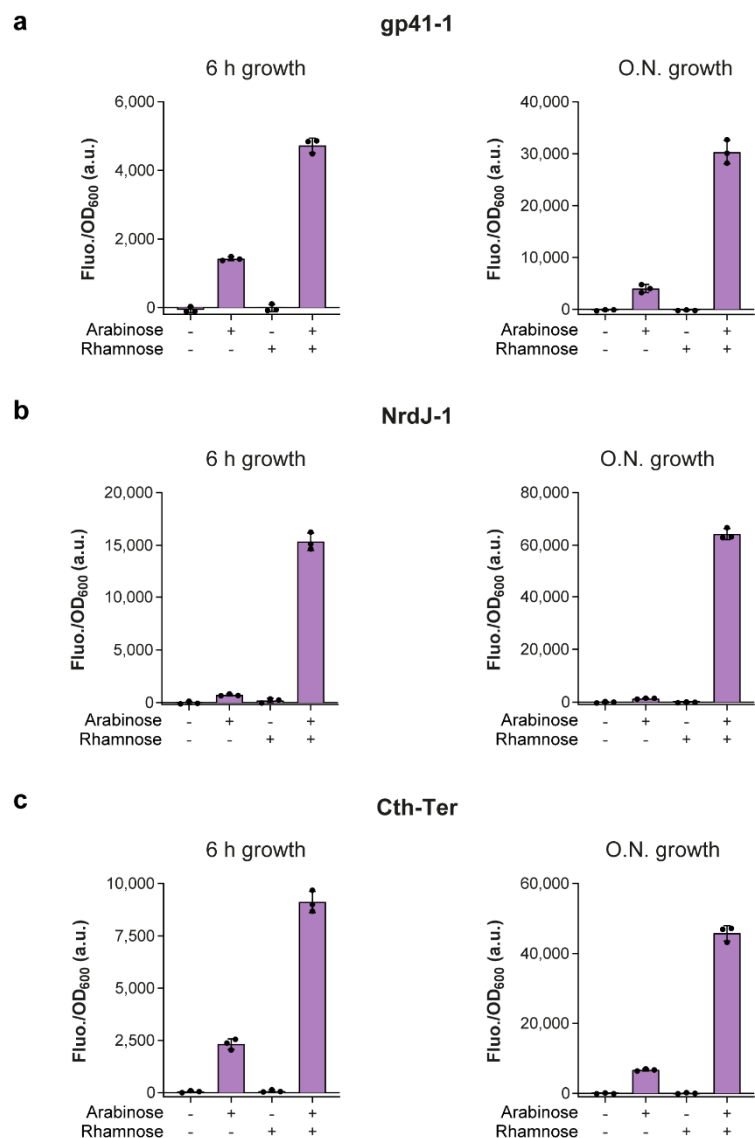

**Supplementary Figure 18 | Split mCherry-split intein-based logic AND gates exhibiting C-terminal leakiness. a-c,** Background subtracted fluorescence (Fluo.) of *E. coli* cells harboring the genetic circuits for split mCherry-split intein chimeric proteins, in the absence (-) or presence (+) of inducers. All C-terminal halves are controlled by a strong RBS (B0030). Fluorescence was measured 6h after inoculation (left) or after overnight growth (right) and it was normalized to the cell density (OD<sub>600</sub>). Bars represent the mean of three biological replicates ( $n = 3$ ) and error bars correspond to s.d. Source data are provided as a Source Data file.



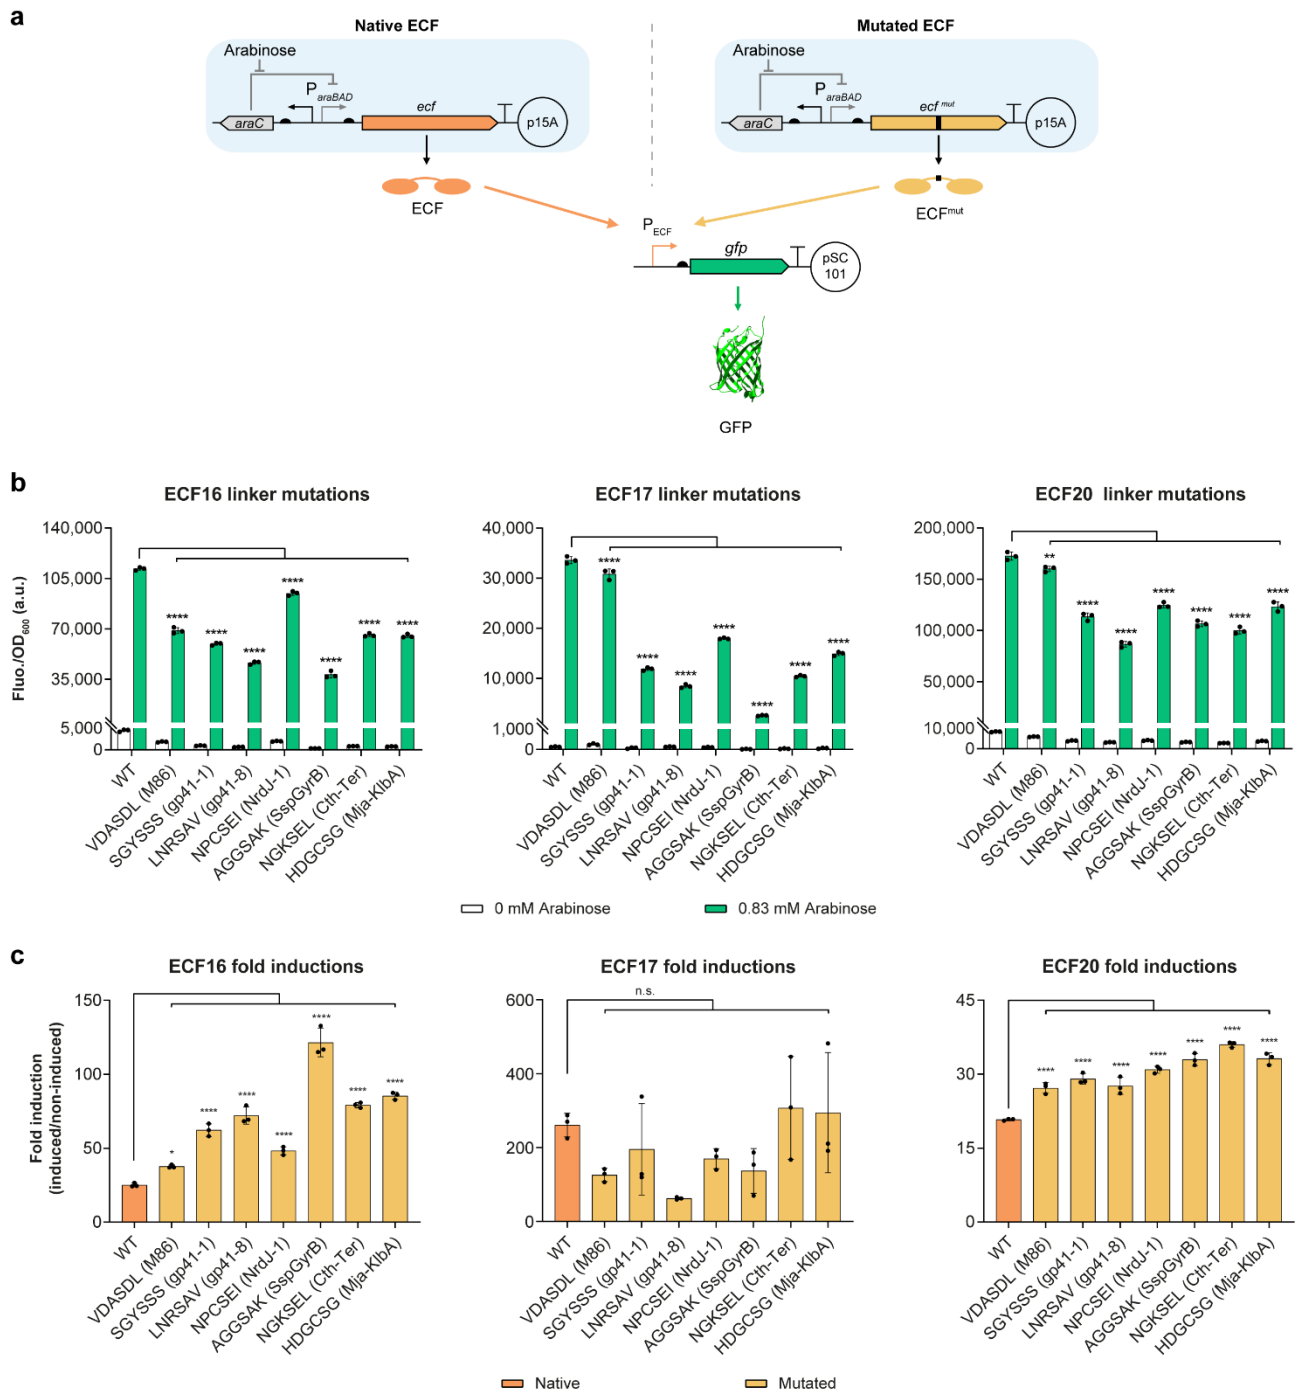

**Supplementary Figure 20 | Effect of linker mutation on ECFs activity.** **a**, Genetic circuits for the arabinose-induced expression of native ECFs (WT) or ECFs with the linker region mutated to inteins' preferred junction sequences (ECF<sup>mut</sup>), in the presence of their respective reporter plasmid (ECF cognate promoters upstream the GFP reporter encoding gene). **b**, Background subtracted fluorescence (Fluo.) of *E. coli* cells harboring the genetic circuits described in **a**, in the absence or presence of 0.83 mM arabinose, normalized to the cell density (OD<sub>600</sub>). Bars represent the mean of three biological replicates ( $n = 3$ ) and error bars correspond to s.d. **c**, Fold induction (induced/non-induced) calculated for each native or mutated ECF. Bars represent the mean of the fold induction calculated for the three biological replicates ( $n = 3$ ) and error bars correspond to s.d. Statistical differences were determined for each ECF (ECF<sup>mut</sup> vs ECF) by means of two-tailed Student's *t* tests ( $*P=0.0217$ ;  $**P= 0.0016$ ;  $****P\leq 0.0001$ ; n.s. non-significant). Non-significant *P* values are 0.3494 for VDASDL (M86), 0.9104 for SGYSSS (gp41-1), 0.0825 for LNRSVA (gp41-8), 0.7168 for NPCSEI (NrdJ-1), 0.4299 for AGGSAK (SspGyrB), 0.9821 for NGKSEL (Cth-Ter), 0.9971 for HDGCSG (Mja-KlbA). Source data and detailed statistical analyses are provided as a Source Data file.

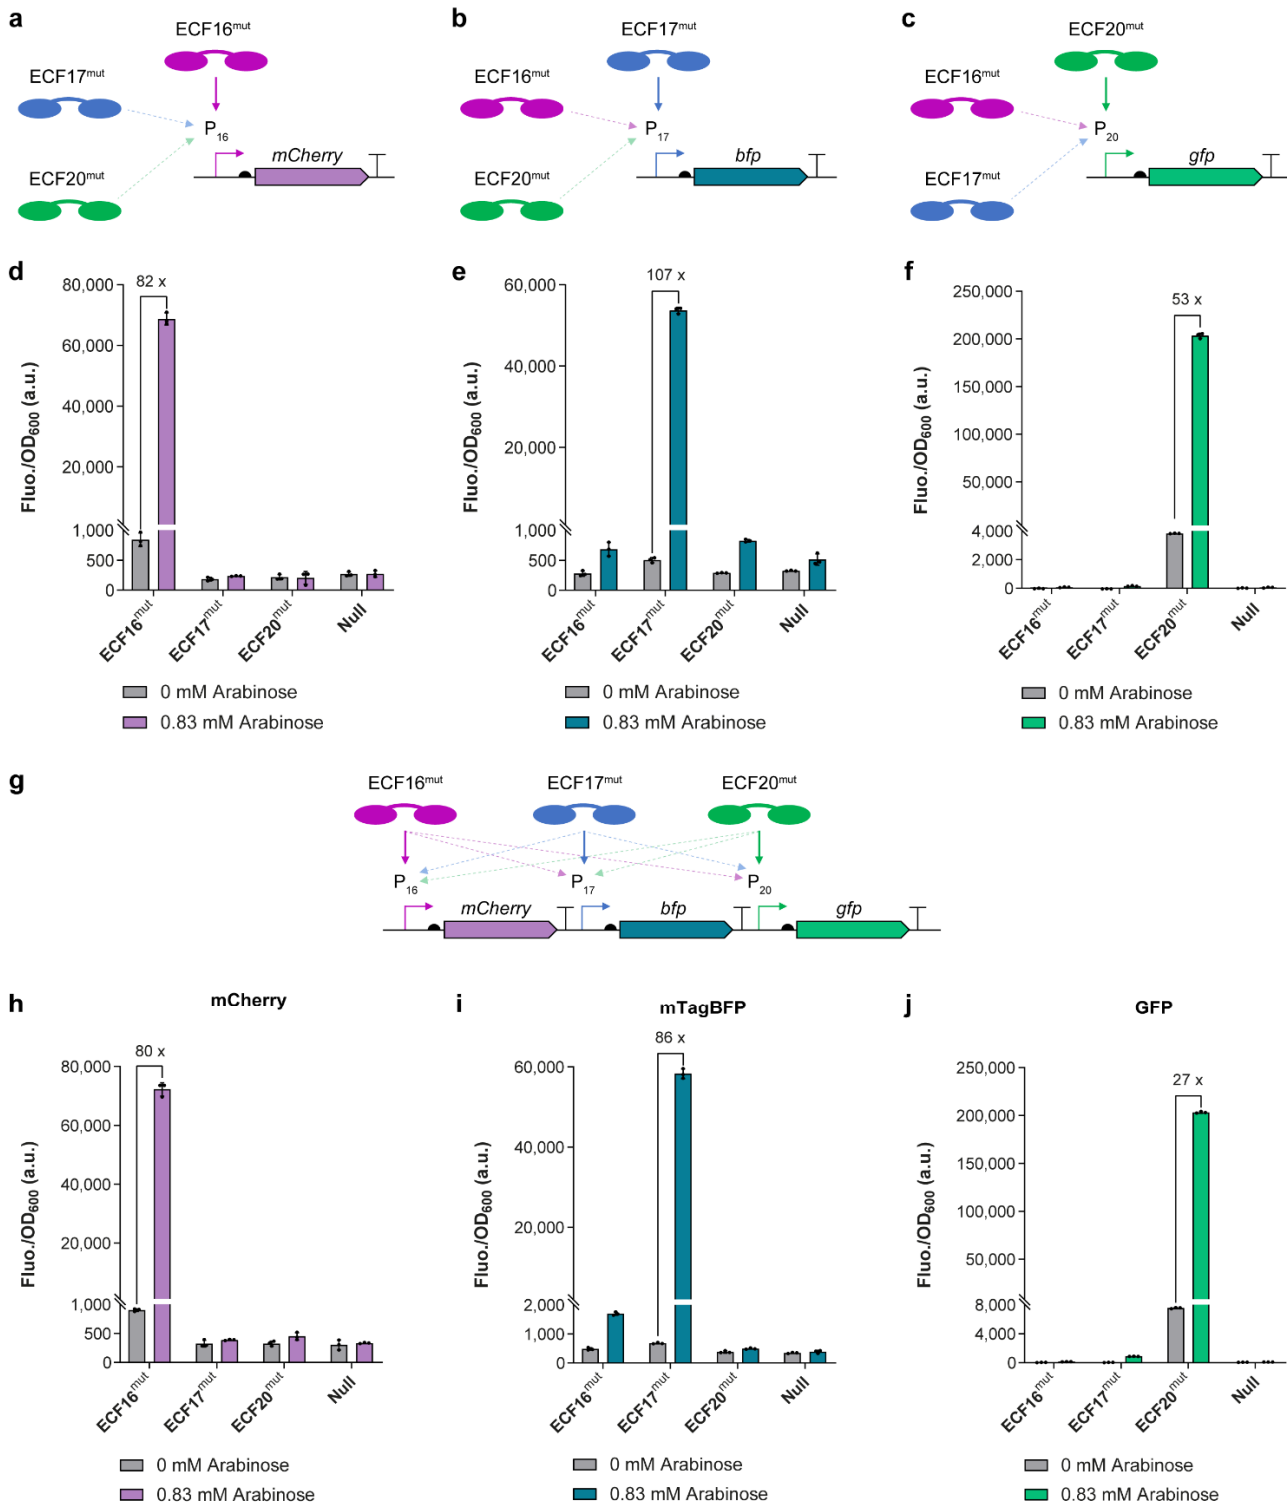

**Supplementary Figure 21 | Orthogonality analysis of the mutated ECF sigma factors.** **a-c**, Schematics of ECF<sup>mut</sup> cognate promoter activation (solid arrows) and cross-reactivity by non-cognate ECFs (dashed arrows) for reporter plasmids containing P<sub>16</sub>-*mCherry* (**a**), P<sub>17</sub>-*bfp* (**b**) or P<sub>20</sub>-*gfp* (**c**). **d-f**, Background subtracted fluorescence (Fluo.) of *E. coli* cells harboring the reporter plasmids containing P<sub>16</sub>-*mCherry* (**d**), P<sub>17</sub>-*bfp* (**e**) or P<sub>20</sub>-*gfp* (**f**) and the plasmids for the arabinose-induced expression of the different mutated ECF sigma factors (ECF<sup>mut</sup>). **g**, Schematics of ECF<sup>mut</sup> cognate promoter activation (solid arrows) and cross-reactivity by non-cognate ECFs (dashed arrows) for a reporter plasmids containing the three reporter genes, each under the control of an ECF cognate promoter. **h-j**, Background subtracted red (**h**), blue (**i**) and green (**j**) fluorescence (Fluo.) of *E. coli* cells harboring the 3-reporter plasmid and one of the plasmid for the arabinose-induced expression of an ECF<sup>mut</sup>. In all the cases, *E. coli* cells containing only the respective reporter plasmids (null) were included as controls. Cells in **d-f** and **h-j** were grown in the absence or presence of 0.83 mM arabinose and fluorescence was measured for each reporter 6 h after inoculation and it was normalized to the cell density (OD<sub>600</sub>). Bars represent the mean of three biological replicates ( $n = 3$ ) and error bars correspond to s.d. Source data are provided as a Source Data file.

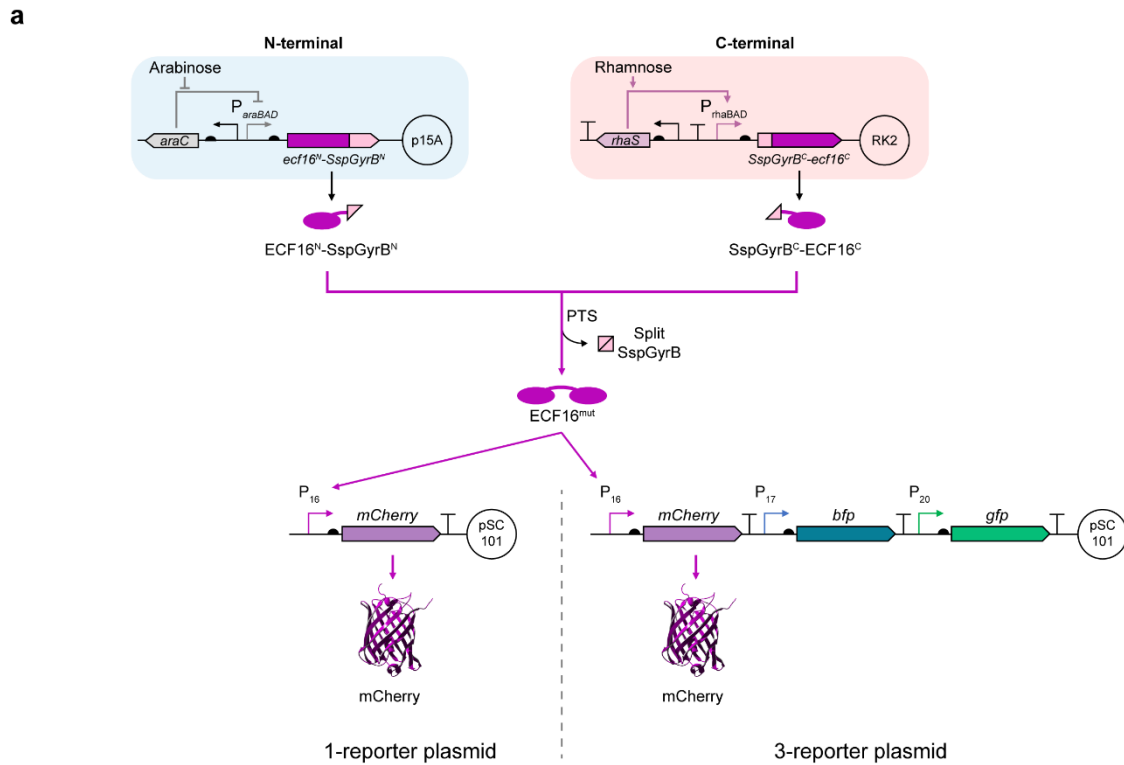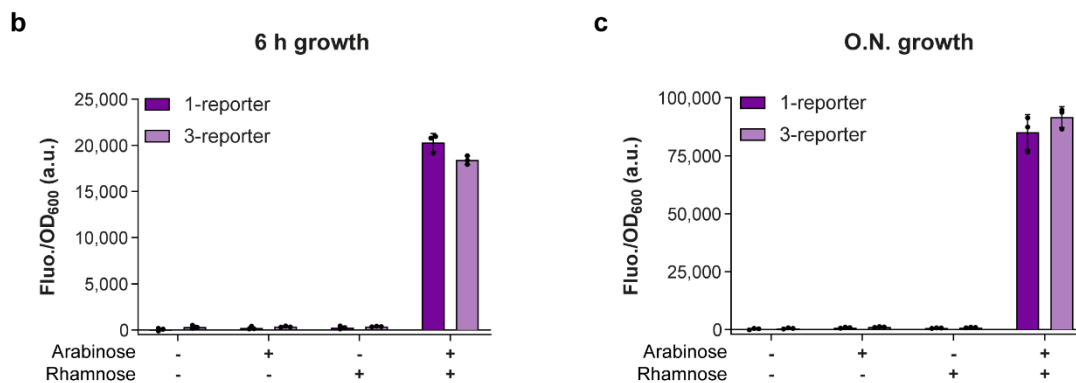

**Supplementary Figure 22 | ECF16<sup>mut</sup> x SspGyrB AND gate characterization.** **a**, Genetic circuits for the arabinose- and rhamnose-induced expression of split ECF16<sup>mut</sup>-split SspGyrB intein N- and C-terminal halves, respectively, from two different plasmids (top). Schematics of protein trans-splicing with subsequent cognate promoter activation (P<sub>16</sub>) and mCherry expression after *trans*-splicing, in a 1- or 3-reporter plasmid situation (bottom). Split ECF16<sup>mut</sup> halves are shown in dark pink and SspGyrB halves in light pink. **b-c**, Background subtracted fluorescence (Fluo.) of *E. coli* cells harboring the three genetic circuits for the expression of chimeric split ECF16<sup>mut</sup> x SspGyrB halves and expression of the mCherry reporter from P<sub>16</sub>. mCherry fluorescence was measured 6 h after inoculation (**b**) or after overnight growth (**c**) and it was normalized to the cell density (OD<sub>600</sub>). Bars represent the mean of three biological replicates ( $n = 3$ ) and error bars correspond to s.d. Source data are provided as a Source Data file.



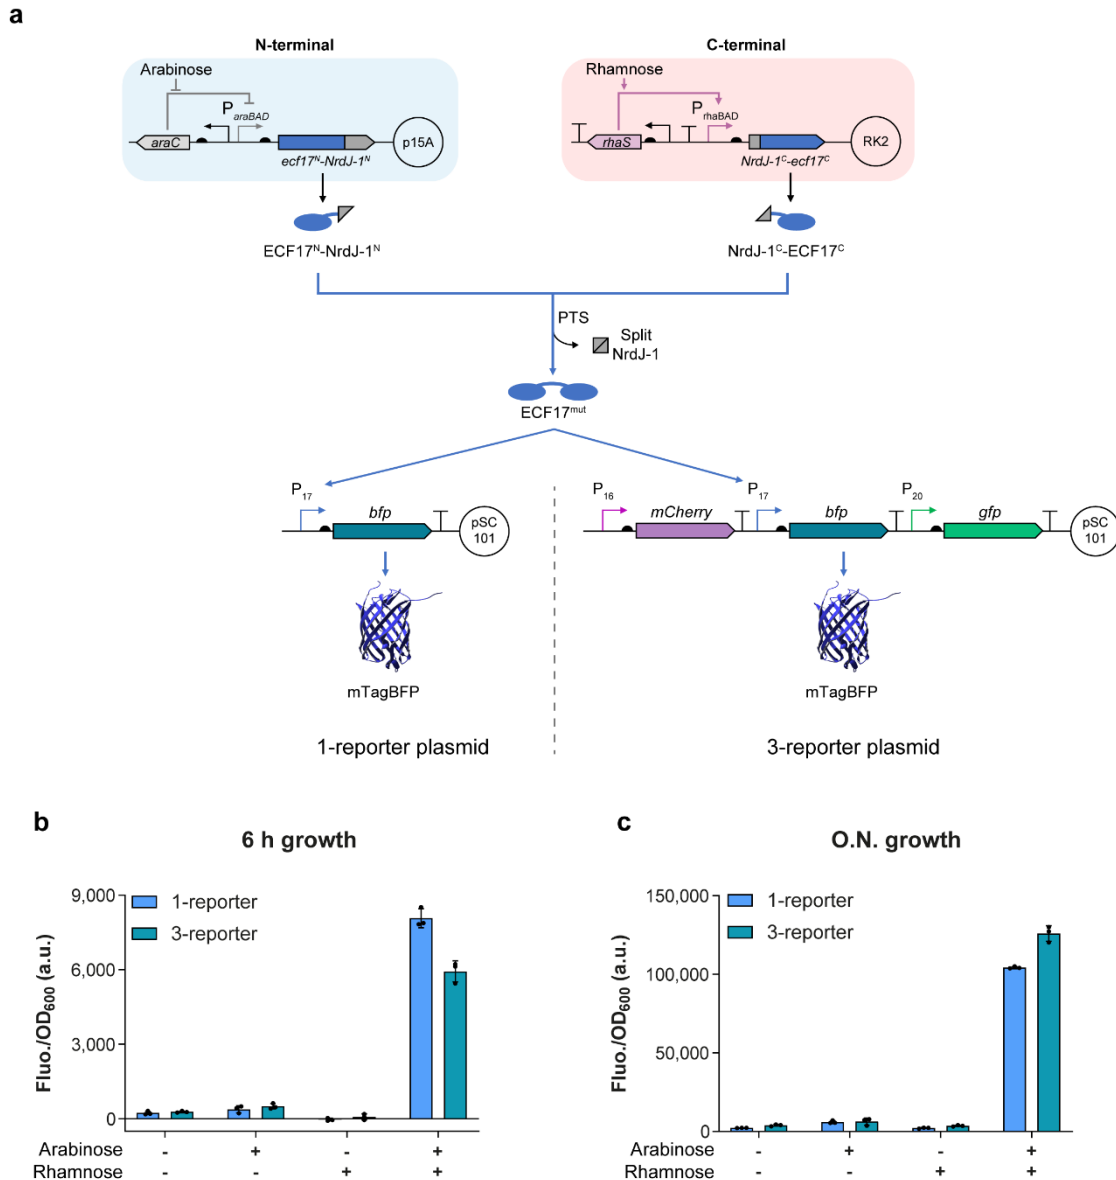

**Supplementary Figure 23 | ECF17<sup>mut</sup> x NrdJ-1 AND gate characterization.** **a**, Genetic circuits for the arabinose- and rhamnose-induced expression of split ECF17<sup>mut</sup>-split NrdJ-1 intein N- and C-terminal halves, respectively, from two different plasmids (top). Schematics of protein trans-splicing with subsequent cognate promoter activation (P<sub>17</sub>) and mTagBFP expression after *trans*-splicing, in a 1- or 3-reporter plasmid situation (bottom). Split ECF17<sup>mut</sup> halves are shown in dark blue and NrdJ-1 halves in gray. **b-c**, Background subtracted fluorescence (Fluo.) of *E. coli* cells harboring the three genetic circuits for the expression of chimeric split ECF17<sup>mut</sup> x NrdJ-1 halves and expression of the mTagBFP reporter from P<sub>17</sub>. mTagBFP fluorescence was measured 6 h after inoculation (**b**) or after overnight growth (**c**) and it was normalized to the cell density (OD<sub>600</sub>). Bars represent the mean of three biological replicates ( $n = 3$ ) and error bars correspond to s.d. Source data are provided as a Source Data file.

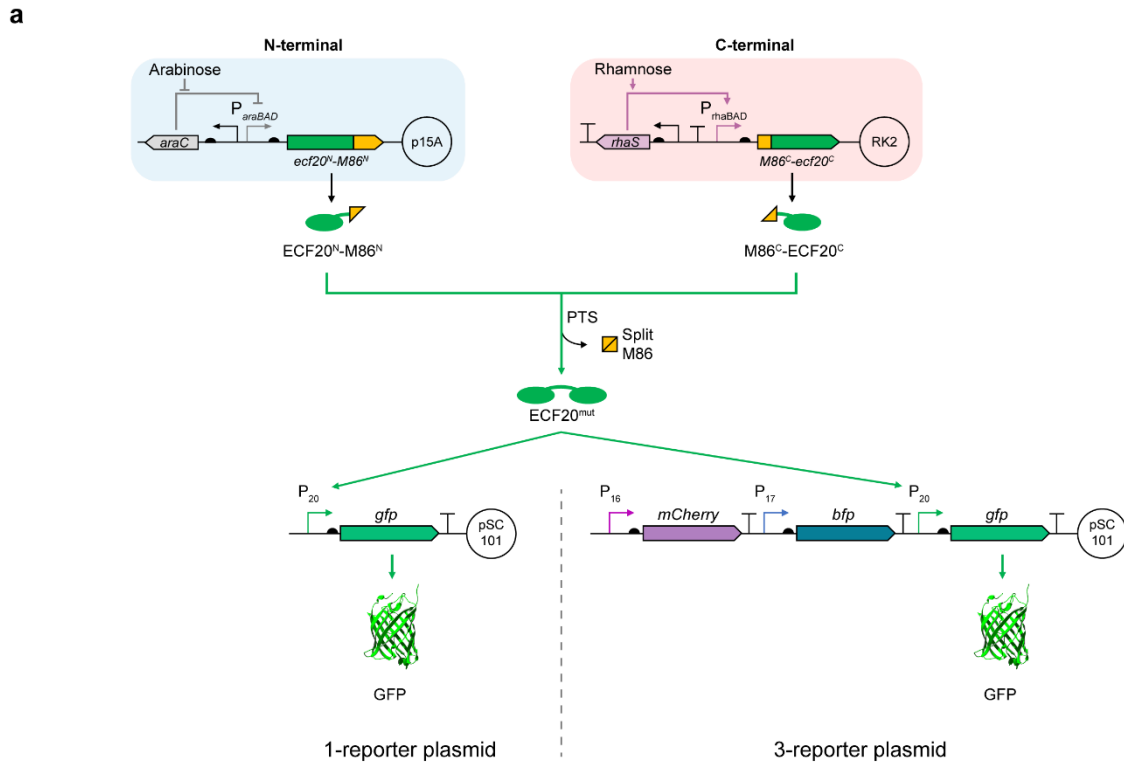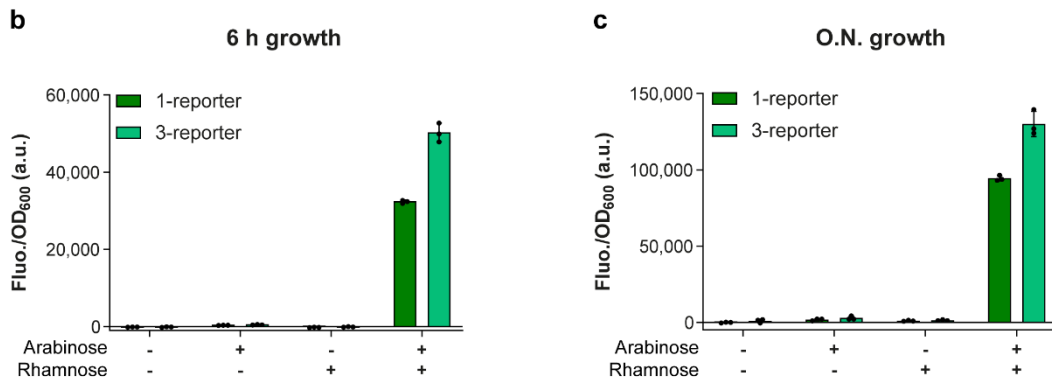

**Supplementary Figure 24 | ECF20<sup>mut</sup> x M86 AND gate characterization.** **a**, Genetic circuits for the arabinose- and rhamnose-induced expression of split ECF20<sup>mut</sup>-split M86 intein N- and C-terminal halves, respectively, from two different plasmids (top). Schematics of protein trans-splicing with subsequent cognate promoter activation (P<sub>20</sub>) and GFP expression after *trans*-splicing, in a 1- or 3-reporter plasmid situation (bottom). Split ECF20<sup>mut</sup> halves are shown in green and M86 halves in yellow. **b-c**, Background subtracted fluorescence (Fluo.) of *E. coli* cells harboring the three genetic circuits for the expression of chimeric split ECF20<sup>mut</sup> x M86 halves and expression of the GFP reporter from P<sub>20</sub>. GFP fluorescence was measured 6 h after inoculation (**b**) or after overnight growth (**c**) and it was normalized to the cell density (OD<sub>600</sub>). Bars represent the mean of three biological replicates ( $n = 3$ ) and error bars correspond to s.d. Source data are provided as a Source Data file.

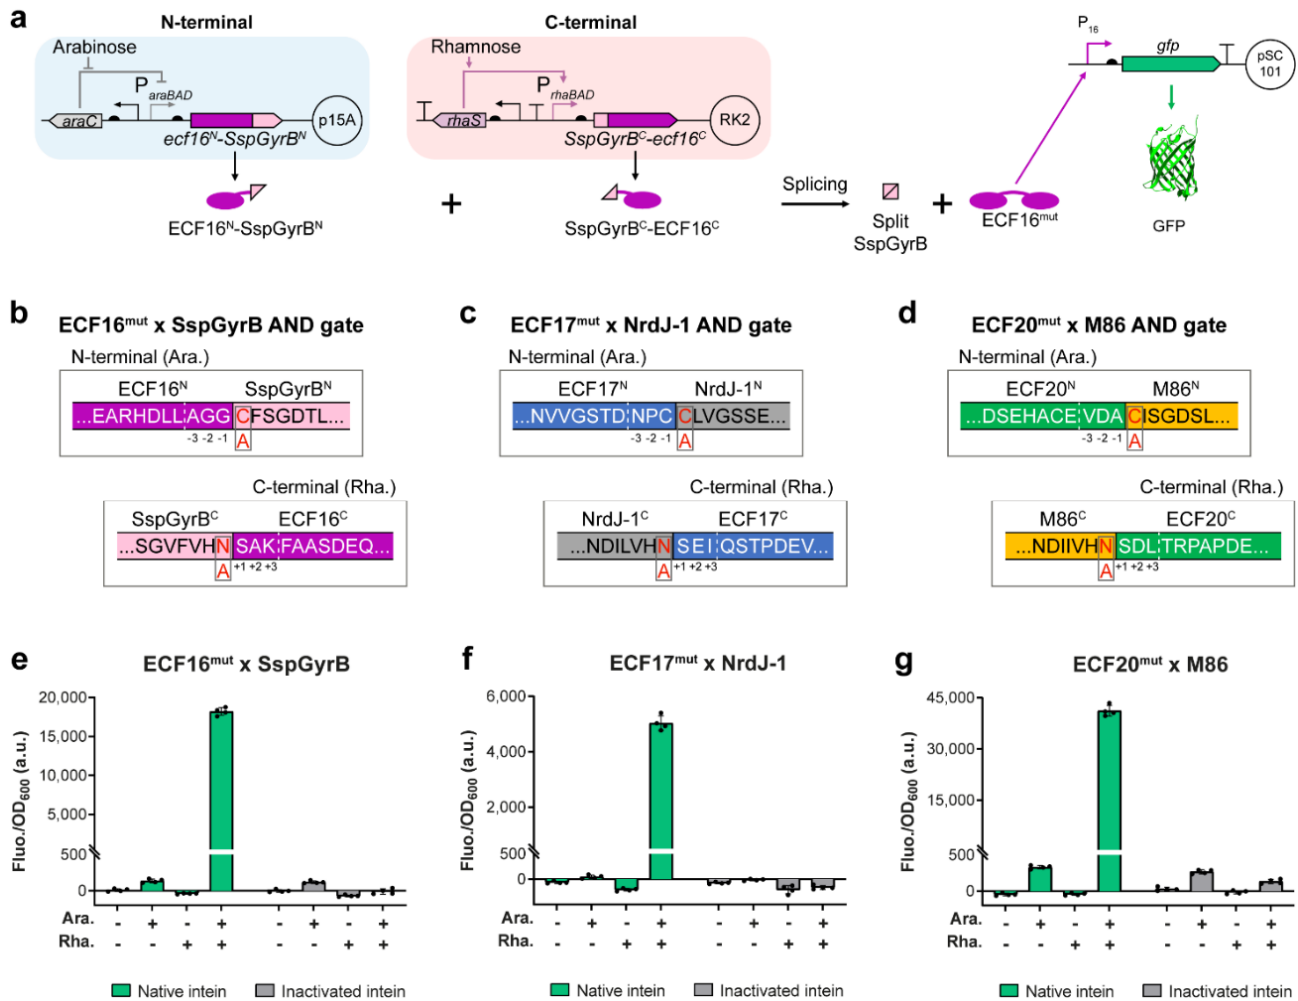

**Supplementary Figure 25 | ECF-based AND gates depend on inteins' splicing activity.** **a**, Genetic circuits for the arabinose- and rhamnose-induced expression of split ECF<sup>mut</sup>-split intein N- and C-terminal chimeric proteins, respectively, from two different plasmids (top, left), and schematics of protein *trans*-splicing (bottom), exemplified using ECF16<sup>mut</sup> and the SspGyrB intein. Split ECF16<sup>mut</sup> halves are shown in dark pink and SspGyrB halves in light pink. After splicing, the reconstituted ECF16<sup>mut</sup> can activate its cognate promoter (P<sub>16</sub>) and the fluorescent reporter (GFP) is expressed (right). **b-d**, Sequence details of split ECF x split intein chimeric proteins, showing the junction regions for ECF16<sup>mut</sup> x SspGyrB (**b**), ECF17<sup>mut</sup> x NrdJ-1 (**c**) and ECF20<sup>mut</sup> x M86 (**d**) AND gates. The junction sequence amino acid residues (-3, -2, -1 and +1, +2, +3) are separated by a dashed line and the inteins' catalytic residues (at both N- and C- termini) are in red. Inactivated inteins were produced by mutating both catalytic residues to alanine (A). **e-g**, Background subtracted fluorescence (Fluo.) of *E. coli* cells harboring the genetic circuits for the expression of the native (green) or inactivated (gray) intein split ECF-based AND gates: ECF16<sup>mut</sup> x SspGyrB (**e**), ECF17<sup>mut</sup> x NrdJ-1 (**f**) and ECF20<sup>mut</sup> x M86 (**g**). Cells were cultivated in the absence or presence of arabinose (Ara., 0.83 mM) and rhamnose (Rha., 15.3 mM) as annotated under the graphs. GFP fluorescence was measured 6 h after inoculation and it was normalized to the cell density (OD<sub>600</sub>). Bars represent the mean of four biological replicates ( $n = 4$ ) and error bars correspond to s.d. Source data are provided as a Source Data file.

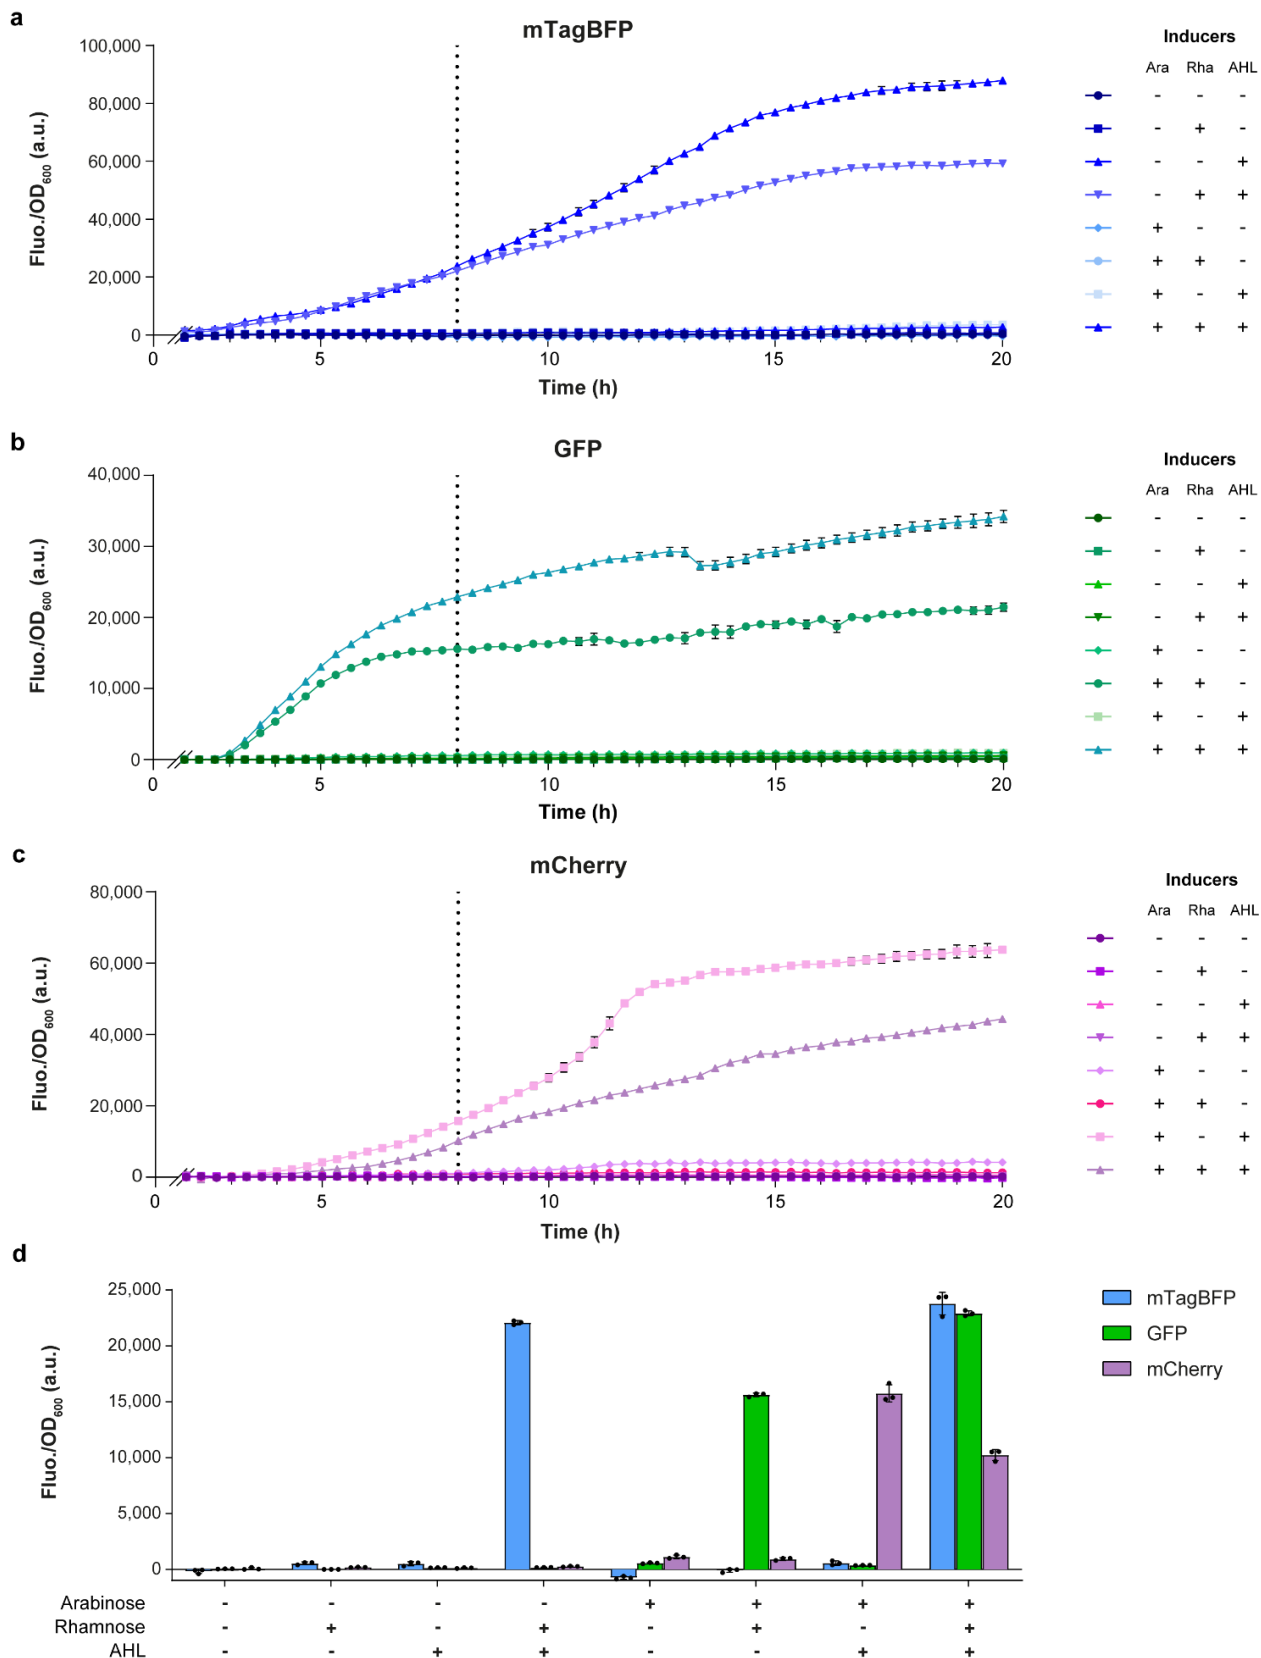

**Supplementary Figure 26 | 3-input/3-output integrated circuit characterization.** **a-c**, Time course analysis of mTagBFP (**a**), GFP (**b**) and mCherry (**c**) fluorescence (Fluo.) in *E. coli* cells carrying the integrated logic circuit and exposed to the eight possible input combinations (-, absence of input; +, presence of input). Measurements were taken every 20 min and data represents mean values of background subtracted fluorescence, normalized to the cell density (OD<sub>600</sub>). Data in **a-c** denotes the mean of three biological replicates ( $n = 3$ ) and error bars correspond to s.d. The dotted vertical lines represent the time-point analyzed in **d** (8 h after inoculation). **d**, Background subtracted Fluo./OD<sub>600</sub> of mTagBFP, GFP and mCherry, measured 8 h after inoculation for each combination of inputs. Bars represent the mean of three biological replicates ( $n = 3$ ) and error bars correspond to s.d. Source data are provided as a Source Data file.

**a** - *E. coli* BL21

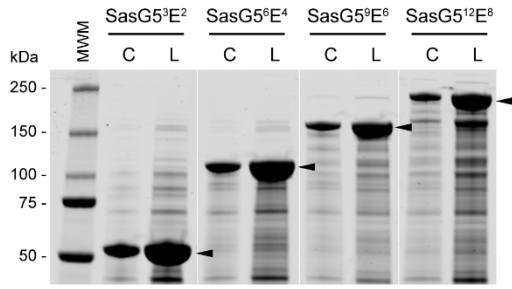

**b** - *E. coli* Origami

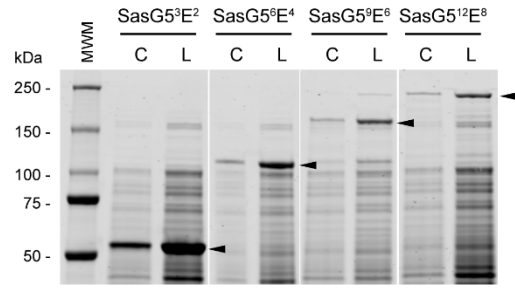

**Supplementary Figure 27 | Full-length SasG-based proteins expression analysis. a-b**, SDS-PAGE analysis of BL21 (**a**) or Origami (**b**) *E. coli* cells expressing the full-length SasG-based proteins including final junction sequences. Whole cells (C) or clear lysates (L) were analyzed. Arrowheads indicate the recombinant proteins. MWM - Molecular weight marker. The proteins' theoretical molecular weights can be found in **Supplementary Table 9**. Protein gel images are representative of two independent experiments with similar results. Source data are provided as a Source Data file.

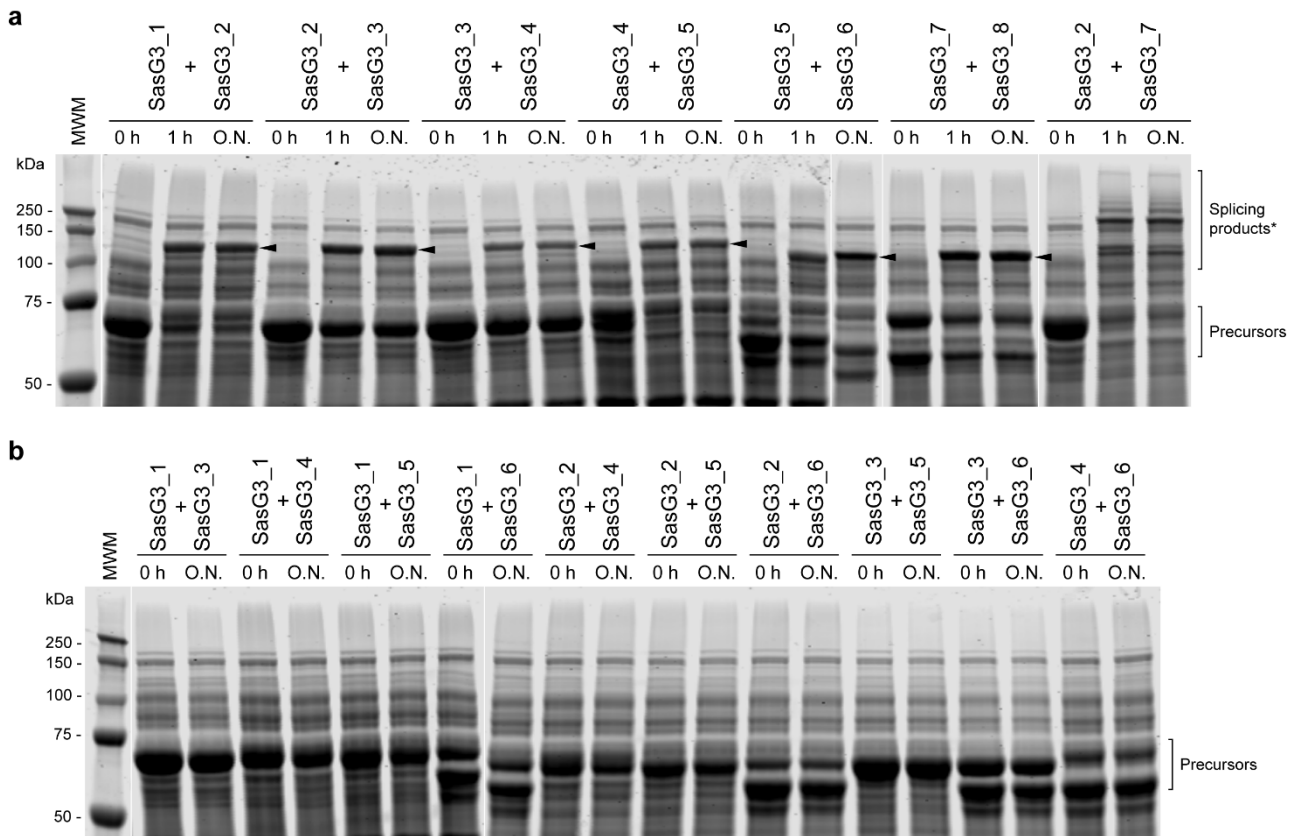

**Supplementary Figure 28 | SasG3 assembly units *trans*-splicing and cross-reactivity assessment. a**, SDS-PAGE analysis of *trans*-splicing reactions between corresponding SasG assembly units containing split inteins. For each pair, non-reacted (0h), reactions incubated for 1 h and reactions incubated overnight (O.N.) were analyzed. Expected splicing products are indicated by arrowheads. Assembly units SasG3\_2 and SasG3\_7 react indefinitely originating multiple splicing products (\*). **b**, SDS-PAGE analysis of cross-reactivity between SasG assembly units containing unrelated split inteins. For each pair, non-reacted (0h) or reactions incubated overnight (O.N.) were analyzed. MWM - Molecular weight marker. Protein gel images are representative of three independent experiments with similar results. Source data are provided as a Source Data file.

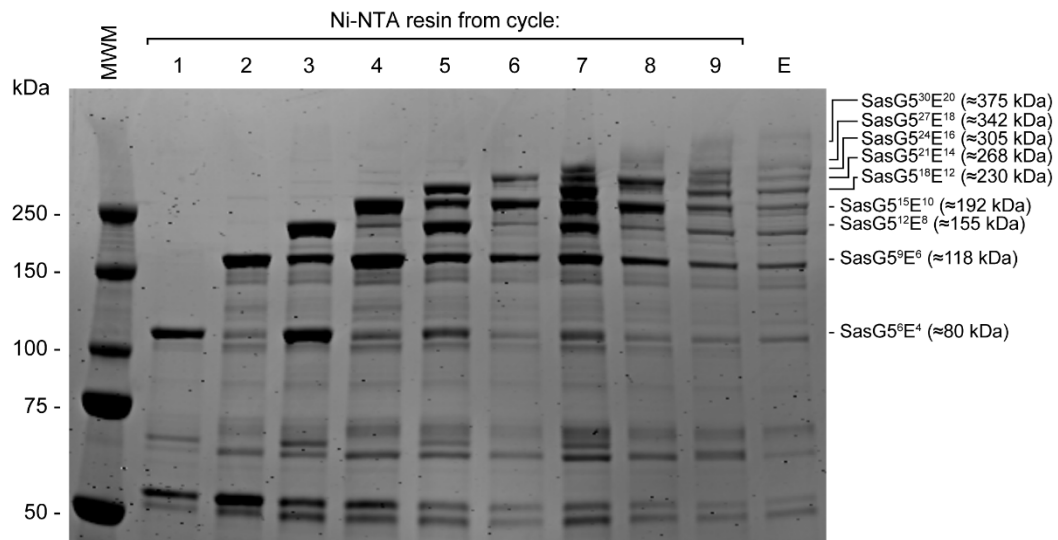

**Supplementary Figure 29 | *In vitro* production of up to SasG5<sup>30</sup>E<sup>20</sup> by recursive solid-phase assembly.** SDS-PAGE analysis of the Ni-NTA resin after each cycle of recursive solid-phase assembly (1-9) and final protein elution (E). The full-length final protein and other side products resulting from incomplete splicing reactions are indicated. MWM - Molecular weight marker. The protein gel image is representative of three independent experiments with similar results. Source data are provided as a Source Data file.

**Supplementary Table 1 | List of viral and viral-like inteins retrieved from InBase**

| <b>Intein</b>      | <b>Extein</b>                                                     | <b>Organism</b>                                                                                      | <b>Protein sequence</b>                                                                                                                                                                                                                                                                                                                                                                                                                                                                                                                                                                                                                                                                                                                                                                             |
|--------------------|-------------------------------------------------------------------|------------------------------------------------------------------------------------------------------|-----------------------------------------------------------------------------------------------------------------------------------------------------------------------------------------------------------------------------------------------------------------------------------------------------------------------------------------------------------------------------------------------------------------------------------------------------------------------------------------------------------------------------------------------------------------------------------------------------------------------------------------------------------------------------------------------------------------------------------------------------------------------------------------------------|
| APMV Pol           | DNA polymerase B (alpha or family B)                              | <i>Acanthamoeba polyphaga</i> Mimivirus                                                              | SVTGDTP I ITRHQNGDIN I T T I E E L G S K W K P Y E I F K A H E K N S N R K F K Q Q S Q Y P T D S E V W T A K G W A K I K R V I R H K T V V K K I Y R V L T H T G C I D V T E D H S L L D P N Q N I I K P I N C Q I G T E L L H G F P E S N N V Y D N I S E Q E A Y V W G F F M G D G S C G S Y Q T K N G I K Y S W A L N N Q D L D V L N K C K K Y L E E T E N I Q F K I L D T M K S S S V Y K L V P I R K I K Y M V N K Y R K I F Y D N K K Y K L V P K E I L N S T R D I K N S F L E G Y A A D G S R K E T E N M G C R R C D I K G K I S A Q C L F Y L L K S L G Y N V S I N I R S D K N Q I Y R L T F S N K K Q R K N P I A I K K I Q L M N E T S N D H D G D Y V Y D L E T E S G S F H A G V G E M I V K N                                                                                      |
| CV-NY2A RIR1       | Ribonucleoside-diphosphate reductase, alpha subunit               | <i>Chlorella virus NY2A</i> infects <i>Chlorella</i> NC64A, which infects <i>Paramecium bursaria</i> | CVAGDTK I L T S S G Y H P I K D M E G K Q V R V W N G Y E F S E T I V H K T G V N Q K L I M V S L D D G T E L R C T P Y H K F Y I E T G S R P A D K S R V M E V R A G D L E K G D R I I R F E L P T I T V G E T T M S D K E A Y T K G F F S A D G C V I K S Y G E D E Y R I S V K R E D K I E A L T K Y V D V I K S H T N R F R T H F Y P D Y V Q N K F E V P I N S M V N E K I S W L A G F M D G D G C V I R Y K D I E N M Q A V S I N K S F L Q D I R L M Q T I G I H S T I N K F M P N R V M K M P D G R G G T D M Y N G A E S W R L Q I D S E G V R K L F A L G F T P R R L K M N G S R K R H H K T N K F T R V V S V T D H G D V E D T Y C F N E P K R H M G V F N G V I T G Q                                                                                                                 |
| CV-NY2A ORF2123 92 | ORF212392                                                         | <i>Chlorella virus NY2A</i> infects <i>Chlorella</i> NC64A, which infects <i>Paramecium bursaria</i> | CLHPETD V I T F S G T V I K A K D L R P G M Q L M G L D S T P R R V L D I G R G R E M M Y E I V P I K G E P W K C N E T H V L S L I Y N E H G S I Q K T K S N T Y F V K F H E Y T S D G R G V F K Y P T V K T L K E A Q D I V A R L N P N H I V D I P L N E Y L N L P K H V K N S L K L F R S G P I T F P N K P E P K F H P Y I L G A W L G D G K S S T A E I T I D V K E K P L L N H V S N L L R P L G M I A S K R T G A S S L K R T D H Y R I Q Y P D N N S R K G S N P F M D A L K S Y D L I S N K H I P D D I K C G S L N V R L Q I L A G L L D T D G Y L G G N C F E I T Q K N R L S E D I A F V A R S L G Y A A Y L K M V K K S C T Y K G E K K C G T Y Y K V S I S G E G L E K I P T I L E R K C A K P R Q Q V K D A R R T G F T V R K L S V G D Y V G P V L D K D H R Y L L G D F T V T H N |
| CroV RIR1          | Ribonucleoside-diphosphate reductase, alpha subunit               | <i>Cafeteria roenbergensis virus BV-PW1</i>                                                          | CFTPDTP I F T N D G F V S I E N I K P H M K V M T S D G T F R N V N K I F K N N V N K N I L K I N T H S L E E I K C T K E H D I L I Y Q N I N N E S N Y E Q I T H Y I E T N K Y T P N F V K A S E L K V G D F M V I P K I Q I N K Q T T Y S E D D Y Y L L G L I L G K G T I V L N K D Y H L M E C M L T L D T N S I S Y Q F V K N Y L T T K N I C F S E I N N N S I E W N L P E N F I I Q Y D D L Y I N D I K Y F S D K P I T G E T N K L L K I G L I D S N G M I D R E I T V K A S N K N M A Y S I R V I L M I L G I P S S G H F T D N Y I I K I P K T N M I S N I L N I E P D N T F N Y I E L E T C I L T K I E N I D M C E Y S G V Y D L N I E E N H N Y L T S S G I V H N                                                                                                                       |
| CroV Pol           | DNA polymerase (alpha or family B)                                | <i>Cafeteria roenbergensis virus BV-PW1</i>                                                          | SVIGDTP L L L L K N K F T N E I L I N K I K D L S S N W S N Y H N G K E S C E I D T Y Q T W T E T G W T D I K R V I R H K L E S N K K L L K I Q T H N G E V I V T D E H S L L N K N G K T I N A K N V K V G D N I L H S F P S Y I N N I D N T N S I N Y H N K F Y N K K M C N E L A Y I L G C F M K Y G L C D S S K K C F T I N N K D I N L I E S L K K M C E N I F D E F K W K I S S S S H L S D N I Y K L V P Q N E I K L D F I K Y F T N K M Y N N G E K K V P Q C I L N S S K E Y I K I F L I G L Y P E Y K L E N N Q Q F I Y T C K N N E F S L G I Y Y L I K K L G Y H V K L N S N D S S D S S I Y T F E I S H K L E N N N N V I T K I T E W E H K E T Y V Y D L T T E N H H F H A G V G S I I V H N                                                                                           |
| CroV RPB2          | DNA-directed RNA polymerase beta (II) subunit 2                   | <i>Cafeteria roenbergensis virus BV-PW1</i>                                                          | CQKYD T L V L T H L G W I K L G E I D I T I H K V A T L D K H D N I I Y V Y P T S K F E F D Y D G D F Y E H K N N S I D I E C T I N H K L Y C K Y N L S S S F L I P A D K V Y G N K V I M K N M E N E V I W T D P S K E Q I H N Y K G K V Y C I E V P D S H I Y Y M K T S S I T P P V W I G N                                                                                                                                                                                                                                                                                                                                                                                                                                                                                                       |
| CroV Top2          | DNA Topoisomerase IIA                                             | <i>Cafeteria roenbergensis virus BV-PW1</i>                                                          | C I S S D T N V L I W N S K I S K K A K D I Q I G D I L V G D D G N K R N V I D V S F G K G Q M Y K I I Q S K G E N Y S V N N H T L T L M P L H K V I S N S N K L L L W W D N V Y K I I K S K P I D V Q E N K I S D D E I L L N S V Y H D R T K H Y R K V R K E S Q I Y T L A E I D Q L N L S D E I K K E I I D L C N T I P D E N V F D I N I Q D Y M N L D K T T Q T Y I L G V S G K C I N Y P Y K S V N I D P Y L L G L W I G E D C S H N S K I Y L N N R V L N M Y K L S K G I P D D Y L N N K Y I R E S V L A G I I D K K G S V R N G T K I I I E Q K L S N K E L I N D I I Y L A Q S L G F V C S T A N I N K T I T T T G V T H S D N I K T I Y I T G N L A S I P V L R E K N K I N P T N F N I L D S P G Y I T V E K D G I G D Y S I T V D T T T N Q R F L I N D F T V T H N                   |
| CZIV RIR1          | Ribonucleoside-diphosphate reductase, alpha subunit, RNR, class I | <i>Costelytra zealandica</i> iridescent virus                                                        | CVVGETL V L T Q N G Q F P I K Y L V N Q Y V K V W N G E E W S V V V K T G F N Q E L V R V D F N N G T S I I C T P Y H N F L S L E D D S T I K N L K R I C A Q D L P C N F K V L Y F Y Q N L D F V T V K V T K I T H L S Q R A D T Y C F S E P L N N A G V F N G I L T G Q                                                                                                                                                                                                                                                                                                                                                                                                                                                                                                                           |
| HaV01 Pol          | DNA polymerase B (alpha or family B)                              | <i>Heterosigma akashiwo</i> virus 01                                                                 | SVTKETPLMLR T M E T C G N H K H E V I S I E N V F T D N M R S I D M Y S I I G E K E H V M L S R N E E I W T G E N W S R I I R V I R H K T Q K K I Y G V L T E N G Y V E V T E D H S L I S S D Y E L L K P K N C I V K E T Q L L Q S F P D I V E N S T I E N N M I D I P K G Q P C R L T Y F G Q V S A M I I Y T Y L R K R N Y S I T L N C V N S N K F Y I S F M E R P R F K N T K N I I K K I F F I R N T D N E E Y V D V E T E D G I F H A G I G E I I V K N                                                                                                                                                                                                                                                                                                                                       |
| CIV RIR1           | Ribonucleoside-diphosphate reductase, alpha subunit               | <i>Chilo iridescent virus</i>                                                                        | CVAPETM I L T E D G Q F P I K D L E G K I I K V W N G E F S S V T V V K T G T E K E L L E V E L S N G C T L S C T P E H K F I I V K S Y T E A K K Q T D D N A I A N A E R V D A Q D L K P R M K L I K F D L P T L F G N S E H D I K Y P Y T H G F F C G D G T Y T K Y G K P Q L S L Y G D K K E L L Y L D V R T M T G L E D A S G R L N T W L P L D L A P K F D V P I N S S L E C R M E W L A G Y L D A D G C V F R N G T N E S I Q V S C I H L D F L K R I Q L L I G M G V T S K I T K L H D E K I T T M P D G K G G Q K P Y S C K P I W R L F I S S S G L Y H L S E Q G F E T R R L K W E P R Q P Q R N A E R F V E V L K V N K T G R V D D T Y C F T E P I N H A G V F N G I L T G Q                                                                                                             |
| IIV6 RIR1          | Ribonucleoside-diphosphate reductase, alpha subunit               | Invertebrate iridescent virus 6                                                                      | CVAPETM I L T E D G Q F P I K D L E G K I I K V W N G E F S S V T V V K T G T E K E L L E V E L S N G C T L S C T P E H K F I I V K S Y T E A K K Q T D D N A I A N A E R V D A Q D L K P R M K L I K F D L P T L F G N S E H D I K Y P Y T H G F F C G D G T Y T K Y G K P Q L S L Y G D K K E L L Y L D V R T M T G L E D A S G R L N T W L P L D L A P K F D V P I N S S L E C R M E W L A G Y L D A D G C V F R N G T N E S I Q V S C I H L D F L K R I Q L L I G M G V T S K I T K L H D E K I T T M P D G K G G Q K P Y S C K P I W R L F I S S S G L Y H L S E Q G F E T R R L K W E P R Q P Q R N A E R F V E V L K V N K T G R V D D T Y C F T E P I N H A G V F N G I L T G Q                                                                                                             |
| WIV RIR1           | Ribonucleoside-diphosphate reductase, alpha subunit, RNR, class I | <i>Wiseana iridescent virus</i>                                                                      | CVVGETL I L T E N G E Y P I K S L V D R E V S V W N G D E W S D V T V V Q T G T D Q E L L R I D F S N G I F I V C T E Y H R F L V L D R S R P I K D L K R Y A K D L P L N F Q V M Y T H S D L S T T L I K V T K V S K L Q R R A N T Y C F T E Q L N N A G V F N G I L T S N                                                                                                                                                                                                                                                                                                                                                                                                                                                                                                                         |
| CP-P1201 Thy1      | Putative thymidylate synthase                                     | <i>Corynebacterium phage</i> P1201                                                                   | CYSSDTEVLTSEGWKRWEVSMNDSFATLSASGQVEYQY PSEVIQEEYQGMVRAKAGVDDLVT PNHKMLACITTTTRAGRRKENFSLIPADQLIGVSHAYKKDGDWRASGSGAGEDFAWLVGFFAGD GSIQKQWDNQIEFHMSKARKMSALSKAIQALGWKMSARYEKQREDTGHFSIFLPEDKVEFFRFS YDEDSQKRIPOEFIMSLNKEESLALLQGMIDSDGVSVTNESGTGRVFDSTSKSLRDAFSQVALHA GFAANEVEGSTVIAGTEVEINGMKTTLARDCKRVLSERNLRLPEIGKKDSGAKSTYSGWEKYSG TVYCATVPNHLLYVRRNGKPVWWSGN                                                                                                                                                                                                                                                                                                                                                                                                                                     |



|                 |                                                                    |                                                                                                                |                                                                                                                                                                                                                                                                                                                                                                                                                |
|-----------------|--------------------------------------------------------------------|----------------------------------------------------------------------------------------------------------------|----------------------------------------------------------------------------------------------------------------------------------------------------------------------------------------------------------------------------------------------------------------------------------------------------------------------------------------------------------------------------------------------------------------|
| AP-APSE1 dpol   | DNA polymerase A (Pol I or family A)                               | <i>Acyrtosiphon pisum</i> secondary endosymbiot phase 1                                                        | CLAKGTLVLTITGWMPIEIVSQDAYVWDGIEWVVRTDGSVFNGNQEVIQAYGVGMTADHQVLTTEK GWKSASQSKRYNRSSCRCLPDGYKLPFRFRKEINLESTLHLWTRNNHSSNRITKTKKTRYNCLLR MPKGTNNIMQKPKARNVKTFRFCMEQHVSMYSFPFQSMVKLWWSGNNGLOTLAKKFFQFLGR HGQDIPTRLIFRSHQQQCRLLPQKLPGLYVASTSSKYSTSTIRANSRPHNEYTGISSPNRDCSK HALLSPGKKGKSSSTTS GAPKHAIEVYDLINCGPRNRFVIATPDGGLIVHN                                                                                      |
| AP-APSE2 dpol   | DNA polymerase A (Pol I or family A)                               | Bacteriophage APSE-2, isolate=T5A                                                                              | CLAKGTLVLTITGWMPIEIVSQDAYVWDGIEWVVRTDGSVFNGNQEVIQAYGVGMTADHQVLTTEK GWKSASQSKRYNRSSCRCLPDGYELPRFRFRKEINLESTLHLWTRNNHSSNRITKTKKTRYSCLLR MPKGTNNIMQKPKARNVKTFRFCMEQHVSMYSFPFQSMVKLWWSGNNGLOTLAKKFFQFLGR HGQDIPTRLIFRSHQQQCRLLPQKLPGLYVASTSSKYSTSTIRANSRPHNEYTGISSPNRDCSK HALLSPGKKGKSSSTTS GAPKHAIEVYDLINCGPRNRFVIATPDGGLIVHN                                                                                     |
| AP-APSE4 dpol   | DNA polymerase A (Pol I or family A)                               | Bacteriophage of <i>Candidatus Hamiltonella defensa</i> strain 5ATac, endosymbiot of <i>Acyrtosiphon pisum</i> | CLAKGTLVLTITGWMPIEIVSQDAYVWDGIEWVVRTDGSVFNGNQEVIQAYGVGMTADHQVLTTEK GWKSASQSKRYNRSSCRCLPDGYELPRFRFRKEINLESTLHLWTRNNHSSNRITKTKKTRYSCLLR MPKGTNNIMQKPKARNVKTFRFCMEQHVSMYSFPFQSMVKLWWSGNNGLOTLAKKFFQFLGR HGQDIPTRLIFRSHQQQCRLLPQKLPGLYVASTSSKYPTSTIRANSRPHNEYTGISSPNRDCSK HALLSPGKKGKSSSTTS GAPKHAIEVYDLINCGPRNRFVIATPDGGLIVHN                                                                                     |
| AP-APSE5 dpol   | DNA polymerase A (Pol I or family A)                               | Bacteriophage APSE-5                                                                                           | CLAKGTLVLTITGWMPIEIVSQDAYVWDGIEWVVRTDGSVFNGNQEVIQAYGVGMTADHQVLTTEK GWKSASQSKRYNRSSCRCLPDGYELPRFRFRKEINLESTLHLWTRNNHSSNRITKTKKTRYSCLLR MPKGTNNIMQKPKARNVKTFRFCMEQHVSMYSFPFQSMVKLWWSGNNGLOTLAKKFFQFLGR HGQDIPTRLIFRSHQQQCRLLPQKLPGLYVASTSSKYPTSTIRANSRPHNEYTGISSPNRDCSK HALLSPGKKGKSSSTTS GAPKHAIEVYDLINCGPRNRFVIATPDGGLIVHN                                                                                     |
| AP-Aaphi23 MupF | Putative minor head protein, P32, traN-related protein             | Bacteriophage Aaphi23, <i>Haemophilus</i> phage Aaphi23                                                        | CFPGQSELKGLPRPEKLYRRWYSGKLTLELVTDNQTVLLATPNHPILTSNGIKSIDSVNVDYLA CEIKQTFDVTKLNKGLNIPTIEIQVFNLSLLNGVRTSISSSKSGKFGHDFSDSEIEIISIDSFLLI DVLNLFKLEPELGTNADMVICKALFSTDSHFDDLKACASGTSGSSFMRSFNLLCSLLVAHLT PLELFCGLGANIGIIGKQIPANNISRDVEMFSNHIFACAALIHGKDFINWQRDRIMSLVAPNF GHRYTDSFETLSKRLLVTTNNSANFNGAQSLGIEFRRVNVKVVQTASCHINLQTVSGYYNINS VFVSN                                                                       |
| AgP-S1249 MupF  | Putative minor head protein                                        | <i>Aggregatibacter</i> phage S1249                                                                             | CFPGQSELKGLPRPEKLYRRWYSGKLTLELVTDNQTVLLATPNHPILTSNGIKSIDSVNVDYLA CEIKQTFDVTKLNKGLNIPTIEIQVFNLSLLNGVRTSISSSKSGKFGHDFSDSEIEIISIDSFLLI DVLNLFKLEPELGTNADMVICKALFSTDSHFDDLKACASGTSGSSFMRSFNLLCSLLVAHLT PLELFCGLGANIGIIGKQIPANNISRDVEMFSNHIFACAALIHGKDFINWQRDRIMSLVAPNF GHRYTDSFETLSKRLLVTTNNSANFNGAQSLGIEFRRVNVKVVQTASCHINLQTVSGYYNINS VFVSN                                                                       |
| AmaMADE823      | Hypothetical, Phage-related terminase                              | Phage uncharacterized protein [ <i>Alteromonas macleodii</i> 'Deep ecotype']                                   | NIAHSTPVLITANRQVTHGDLVPGDQVVFHPSGKPVLDVLSDEAVDDYVVTFTNGEKIRCHANH EWTVYSRADKQEKVETKWFLENTNRGTPRSITAGNRQFQVQPKTNALEFDSADLPMHPVYVLA WLGDGTNNSGCIITHDKKQPVIDKITRCGYEVSSWTVHKQTVYTRFSGPPFNVAAGRMFKELK ELNVLNNKHIEVFLRASLKDRLLELAGLIDTDGHTDKNSRMRFITADKPLANGVLDLCTTLGF KPIEBEIQFKLSTSCIQGTPKYFVVGFPNPTMVI PVALSRRKRI TRFPTERRVSIEKVEYLPNGEK GHCIQVDSFDGLYLVGKLVATHN                                                  |
| Bse-MLS10 TerA  | Phage terminase-like protein, large subunit-like protein           | <i>Bacillus selenitireducens</i> MLS10 (Probably prophage gene)                                                | QLALDTPITPDGSTMVELQVGDQVIEDEKGNPCNVVARSEIDDTEQAYRITFRDQGSIVAGER HLWQVQVMNNGQREKLLTGTGELYKQKQVKTKNRAIFRIPVDAFSLPERSLPVDPYLPFGYWG NGCATKPEITVRRDDVEAVQREVPYPLNHNHYPQEGNSDILVYHALKPLVLSHFHKDKRI PAAFTR ASKAQRLRLLOGLMDSGCVSTTEKQSYVITLPELAKVDQVGLSGLIKNTLGETPSTRNGVP TGETCYLVRFTAQDLNVSALDRKLNRSRERNPTTRSHFHYIAAIEKAEPTMRCIQVDSPSRL YLAGRSMVPTHN                                                                  |
| BsuP-M1918 RIR1 | Ribonucleoside-diphosphate reductase, alpha subunit                | <i>B. subtilis</i> M1918 (prophage)                                                                            | CVTGETLLLTENGYEKAADLYKKQNNLKVVIDNRTKDFAVDSKGTITVDAIPMQLTKKDAEIKFK VTKKQGYEIRATEWHKFFVYKRDGEIQKQLNQLKTDGKLLVQSAEAGYKGIHEPDLAYIMGIIA GDGTITEKTAKIYLYDNKKVLEQKVTDAVHRIHQKHKVDRAKHNLSLPTFNMANPEKQDLYL MNSTVLFDI LKFKGMNKERTRVPEFIFQANKETQAAAYLSGLFQTDGCVNANHKAKALTIELTS IHYESLQDVQKLLNMGVYTTIYSNNKRSQELLPDGKGGSKLYNVKPTHKISIQDRNSRELFMS IVELKDYDVYKFNLLTETLQPKSRKPKHDFTAIEIISIEDGVEDVYDTTQEDYHSLIFNGIVTG N         |
| BsuP-SPBc2 RIR1 | Ribonucleoside-diphosphate reductase, alpha subunit                | <i>B. subtilis</i> strain 168 Sp beta c2 prophage                                                              | CVTGETLLLTENGYEKAADLYKKQNDLKVVIDNRTKDFAVDSKGTITVDAIPMQLTKKDAEIKFK VTKKQGYEIRATEWHKFFVYKRDGEIQKQLNQLKTDGKLLVQSAEAGYKGIHEPDLAYIMGIIA GDGTITEKTAKIYLYDNKKVLEQKVTDAVHRIHQKHKVDRAKHNLSLPTFNMANPEKQDLYL MNSTVLFDI LKFKGMNKERTRVPEFIFQANKETQAAAYLSGLFQTDGCVNANHKAKALTIELTS IHYESLQDVQKLLNMGVYTTIYSNNKRSQELLPDGKGGSKLYNVKPTHKISIQDRNSRELFMS IVEKDYDVYKFNLLTETLQPKSRKPKHDFTAIEIISIEDGVEDVYDTTQEDYHSLIFNGIVTG N          |
| CbP-C-St RNR    | Ribonucleotide reductase, Anaerobic, RNR, class III                | <i>Clostridium botulinum</i> phage C-St                                                                        | CFDGGQKTLTKSSHGYNVLSFKDLYDTKYKDKERNFKVFNHNGNWVEGKPIRLLRNDDKMKYIT TVNNKEILVTEDEHINVTDKGDYTTQLTENDYIAFNTRPTNAIPEKDEKLTVEQGVLIIGAYLGD GSKQRNEHKIQLSINEEKYNI LRPLIEKALKQWNIQAQYRLYTPHNNTYPTAITSDDLNIIEH VVKGDYSYNKRLNLEILHQSIERKGVLDGIYFTDGGNSNRIYTTSDSLKEDLEILHLSLGMVSI INTTDRDTEKVIIRGEEFNRRNQKGLYKVINNTMFFKIKTIQYYSNDEYVYCFEMKNIEEPYF TLPNGIITHN                                                                |
| CbP-D1873 RNR   | Ribonucleotide reductase, Anaerobic, large subunit, RNR, class III | <i>Clostridium botulinum</i> phage D                                                                           | CFDGGQKTLTKSSHGYNVLSFKDLYDTKYKDKERNFKVFNHNGNWVEGKPIRLLRNDDKMKYIT TVNNKEILVTEDEHINVTDKGDYTTQLTENDYIAFNTRPTNAIPEKDEKLTVEQGVLIIGAYLGD GSKQRNEHKIQLSINEEKYNI LRPLIEKALKQWNIQAQYRLYTPHNNTYPTAITSDDLNIIEH VVKGDYSYNKRLNLEILHQSIERKGVLDGIYFTDGGNSNRIYTTSDSLKEDLEILHLSLGMVSI INTTDRDTEKVIIRGEEFNRRNQKGLYKVINNTMFFKIKTIQYYSNDEYVYCFEMKNIEEPYF TLPNGIITHN                                                                |
| CklPTerm        | Phage terminase, large subunit                                     | <i>Clostridium kluveri</i> DSM 555                                                                             | ALDLTDPIDTPTGWKTRMREICGDYVFGVDGKPTKVIKTSIDIMVNHECYKVTEDGEFIADTE HIWVTTKSRKTLKYKPLKGRQLLRPDYRENGYFDVTTGEMAKNFKHFRRDGGKIEYKRVPMAGAVEYEEKDLILDPIYLGWVIGNGASASARITASVNDTEIEHVQKIGVSVNRYERKPNVLT VTLREPLLDKYCHRGLKIKVYDSRGCKACAREIDYAHRHNLPRPEYKILTIEKELRKLGLVNL NKHIPETYLASLEQRVYELLGLMDTDGYCSKAGQCFVQKNKIIDIDGFSNLLSSLGKIKHSIRK KQAKCNEKSTVHVSFLFYVDKEHSCFKLRKHKRLKDKLSDRMKNKSVINIEKYKVPVKCIADV EDEKLLYLAGNHTATHN |

|                     |                                             |                                                                   |                                                                                                                                                                                                                                                                                                                                                                 |
|---------------------|---------------------------------------------|-------------------------------------------------------------------|-----------------------------------------------------------------------------------------------------------------------------------------------------------------------------------------------------------------------------------------------------------------------------------------------------------------------------------------------------------------|
| Cth-ATCC27405 TerA  | Phage terminase-like protein, large subunit | <i>Clostridium thermocellum</i> ATCC27405 (Probable prophage)     | QLALDTPIPTPDGWTMGEIKAGDKVIEKGRPCNVVAISEIDDEQAYKINFRDGTISIVAGERHLWVKVQVTNNGRREKLLTGMGYQKQFKTKSKENRALFRIPADAFILPENKLPIDPYLFGYWINGNNAVKPEITVMRDDVDEVIKNIPIYKLNHRYKQEGNSDILVYKELKSLIVKNFREKRIPIEYLRASAQQRRKRLQLGLDSDGCVSTAKSQAIYVITLFEFLAKDQDLWLSLGIKNTLKTAPRSARVGETGICEICYLIKFTAFNDLEVSGLDRKLRGRERNIKTRSHFHYIKSIEKTGKTKMRCIQVDSPSRLYLAKSMIPHTN                     |
| Cth-DSM2360 TerA    | Terminase                                   | <i>Clostridium thermocellum</i> DSM 2360 (Probably prophage gene) | QLALDTPIPTPDGWKRMGELKQGDVVFDENGSPCHVLALSEIDDEQAYRLTFDGGSSI IAGARHLWVKVQIINNKRKERLLQTTQMYEAFSAYRKRHKDAPFRSIYRIPVAGALKLPDAKLPVDPYLYGYWLGNGCATRPEITIRTCVAVGLKRIPIYEVSSLWKNVGDVSVVRII PVLKSVLLKSHSHKHIPSEYLRASENQRWELLQGLMDSGDCIGKLAQSIYVSTEKQLALDRELLWLSLGIKNSMTESPQRCGKPTGKTLTYIRFTSFADLPTSLGRLKLRKREKTSSTPSTRSNYHYIHSIEFVKERIPMRCIQVSSPSRQYLAGTSMVPTHN           |
| EP-Min27 Primase    | DNA primase, Helicase                       | Enterobacteria phage Min27                                        | ACPLNEPILLADGTWTHGDVKIGDQVASVDGNPSTVTGIFPQGVDRVYRVTFEDGRYVDCAGDHLWEVTSRGTGKEKRRVIDT FELKRLSETKRHKNGVRIPEITGDFGDHSEPLAWVIGSLLDGDGSLNSGSKVFSNVEPYMIERMKAELPDYNSFGDGKDWL ISTARQANPLMETLRGYGLMGCTAKNKFIPRVFFSANKSTRIGMLCGLLETDGVEKDGTLVFSASSEELRNLQVLSLGGSCRTRVK TGVYTYKDKRHKMGDSYEARIRLREIREAIRSPRLNGLRLTAHRFEGCGVFRVNEKIGNAEC LCIMVDHPRHLYVTRGYVATHN              |
| LLP-KSY1 PolA       | DNA polymerase family A, gp96               | <i>Lactococcus</i> phage KSY1                                     | CFSGDTEILTPYGVKVFEDYDESMCAQYDEVTKGISFTYPNETIHLKQDIWVYEDTNTSIHATGNHDLIQKPNNGDIKAEKFSNLQLLQKGDHFRFINAGYVDSAEVDTLMQRVLTAFPTRIYQTRRDKLHFAIKKPRYVSYLELDDLEVIYHLQREYHSGQDFYYSYIEVDDSFLLDHIREFLNDNLSKYESI PKLGMFFLEAFKDFGHLTSKNGIVVKDIHRSTLDVYVQGVGIRHGKVRINGSYTAAYNLAKGVFSFPFGKAPFTGPSYKGDVYCVNVPHTNIVIRHNDKVS IQGN                                                   |
| LP-phiHSIC Helicase | Helicase                                    | <i>Listonella pelagia</i> phage phiHSIC                           | CHAYGHDIMSDGTKKQVQDI AVGDVKVMGPDGNPRKVI RLKVGQDEMFRVPTPKGESFVNVGGHILSLYQTPRRAGQTPGYTEISVNEYIRSSSTFKHRSKLQRFGDLPGKNLPIPPYILGLLDGDGCITGVGQMSFTSQDHAAITEIERYLMSIGASNRLHFDSREAVGVCFRDYHRLEDHDLTELGLYGRNSGDKFIPSEYLTSSNEDALEMIAGLLD TDGSLCPHGVYDIYSKRELSSEGLVYLCRRVGLAAYI SECKSCQNGFKGTYRYRVCVSGDLSKVPCRVSHKCCI FDRKQKRVVDVTGFKVEPIGVGDYFGFTVDGDHLYLDGDFVRHNN        |
| MP-Be DnaB          | DnaB helicase, gp10                         | Mycobacteriophage Bethlehem                                       | PLALNTEVPTPSGWTTVGDLSVGDYVLSGSDGQPHRVQRETPVLEGLATYVVRFDGTEITASAS HGWTTQRLLTGHDGSYETVTVTEELAQVTVTNSKGRKRHRIPVVGVELPNQELPLDPWFLGLWLDGATSDSTVSYFDYRLRDEYATLLKPLVQEFQTVVWVNDPVPVGTNVGTFRIKNNDRTOQDDKSIRSLR KAGVGLGNKHI PAAYMQAGTDQRFELLRGLDSDGGIDSVGRAYFVNANRNLVYQFQELVVLGFRCTVREHGGDGLARAEFNPNAVRSNLA YKFERQRPYSSRNRSQHRWVESVTPVESVVPVKCIGIDTEDHLFQVRSRRI LTHN     |
| MP-Be gp51          | gp51                                        | Mycobacteriophage Bethlehem                                       | CSWTNARAVTRRGFVHVDLTDDEVMVSDDQGRTIWQQIDEVVRFPFSGTLYSLGGREINATI TANHRVVLNREKTKWVEHTPTSLPGNKMVYTAGEGSNEDYPLTDTEIRLAVWGLTDSHRSPDGRWTFYQSGEKAEQVRKLLADAGIEYRERARNRGI TEIDGKVLKAPPKTQYEFSLGKVEQLDDLD RGRSELPTWTLSLSQRQARLFLEEYRFTDGTDTT SAGDSYVLVYCKDRMREQLQMLAANGL RASTTEYRPGHWRLNISNRALSGLYKNTVEEVAYEVEVWCLRVPNGRFFIEDGGKIHLLTGN                                   |
| MP-KBG gp53         | gp53                                        | Mycobacteriophage phage KBG                                       | CSWTNARAVTRRGFVHVDLTDDEVMVSDDQGRTIWQQIDEVVRFPFSGTLYSLGGREINATI TANHRVVLNREKTKWVEHTPTSLPGNKMVYTAGEGSNEDYPLTDTEIRLAVWGLTDSHRSPDGRWTFYQSGEKAEQVRKLLADAGIEYRERARNRGI TEIDGKVLKAPPKTQYEFSLGKVEQLDDLD RGRSELPTWTLSLSQRQARLFLEEYRFTDGTDTT SAGDSYVLVYCKDRMREQLQMLAANGL RASTTEYRPGHWRLNISNRALSGLYKNTVEEVAYEVEVWCLRVPNGRFFIEDGGKIHLLTGN                                   |
| MP-Catera gp206     | gp206                                       | Mycobacteriophage Catera                                          | SLACSTPIILTTNGWSTMGALQDGEVYAPDGGPTKVIKAHPINLNRPCFKVRFDRDQGEVVTDAEHLWQVNDNRNNGRDRVMTTQE IADAPWGGGRYRFRVPTVPLQTPADLPVDPWLLGAWLGDGDA SMVSI CSQSQDLDYLSRVVGLGSHRVNRYGSRASVYVHGMRAVFSAGLGLLKNKHIPDRYLTASVQRRQLLAGLMDSDGTVSDRQVTISMKNERLMRQVLQVLSLGYRAGFGSRMARLNRCDCGLVYVVRFTGWGESPFDMPRKRDGWEQATKTSVQNLRLNAI VAVEPVEVTPVRCITVAHESSLYVAGEFVPTHN                       |
| MP-Mcjw1 DnaB       | DnaB helicase                               | Mycobacteriophage CJW1                                            | ALDVETPIILTNNGWKKMGDIQVGDYVHAADGTLARVSYSERHWRDCFSVQFADGAELVSDHHLWAVNDRDLKGERVIDTAELYRTQTYGARGDRRYTVVPEALDRDEAPLPDPIYILGAWLGDGDA TRAEFTSDDPEIFAIAEAGYPLSYDYASGNARTRGAKGLVAVLRKMGVLAGAKHVQDYLIGSR AQRLALLQGLMDTDGSVITGPNTPRVEFCNTNRDLAEALFLARSLGWKATLKESRARLNGKDCGPRFRVSWTAYSDMSPFRLQKSEKLAAPARATRARTNTITSVTPVPTVETVICI IDHPHSHVFLAGKSLPTHN                       |
| MP-Omega DnaB       | DnaB helicase                               | Mycobacteriophage Omega                                           | ALAI DTPILSERGWTMGDLVDGDRVYGPDGGQLTNVIAHPRIYRERPCYRLTFDDGGQTI VADEHDLWTVYDAVKREHRTLTVRELVDGGVFTTRRNAGRADSN IYRYRVVPTPELAGVEADLPVDPYLLGYWLDGDTNAGRFTVGEEDLEAFKLTLES LGYEYSDSVDPRGTGAHTICAYGFIQGLREAGVVG NKHIPETYLTASMEQRRALLAGIMSDGGVTGHQISVTMKNEALMRQVLMRLARS LGYKSFSTSHLSMLNGEHKARVYRVK FANRQELNPFRLPRKAAKVL PPLGRVTRAQYNAIVSIEPVESVPTRCITVDNDSRLYVVGHG FVPTHN |
| MP-U2 gp50          | gp50                                        | Mycobacteriophage U2                                              | CSWTNARAVTRRGFVHVDLTDDEVMVSDDQGRTIWQQIDEVVRFPFSGTLYSLGGREINATI TANHRVVLNREKTKWVEHTPTSLPGNKMVYTAGEGSNEDYPLTDTEIRLAVWGLTDSHRSPDGRWTFYQSGEKAEQVRKLLADAGIEYRERARNRGI TEIDGKVLKAPPKTQYEFSLGKVEQLDDLD RGRSELPTWTLSLSQRQARLFLEEYRFTDGTDTT SAGDSYVLVYCKDRMREQLQMLAANGL RASTTEYRPGHWRLNISNRALSGLYKNTVEEVAYEVEVWCLRVPNGRFFIEDGGKIHLLTGN                                   |
| Mca MupF            | Prophage MuMc02, F protein                  | <i>Methylococcus capsulatus</i> Bath, prophage MuMc02             | CFPAETPVRAAARLGLKTYAGKVVELQTRLGHRLTLTANHPVLTVRGWIAACQLQKGDQLIGDASGVNPRLAGVNDQPPARAEDLFQTLAAQGFRI VPMAPHDFHGDAGLRKPEIHIAGPDVHLMDEVQAAPGQFVGGQQLRRADACAIMDADRDPGPPARMI LADAVAPQNPADVAEAGAE LAADGAFGDQPVAVQGGHAFEMGVAVAGALPGGALASNGGVLFDGSPFDALGFRAPPQGDVAGTEQPAQGVTAASGLVRQLEANAGLIALDEIVQIRQFDWAGHVVDFETETGLIMAGGVIVHN                                           |
| PP-PhiEL Helicase   | Helicase, PhiEL_ORF166                      | <i>Pseudomonas aeruginosa</i> phage phiEL                         | AMPLSTRVKVPNGWALGDLKVKDIDVVTGGDTACVESIYPQGITEVYRYFYFEDGRTADSHPHYLWKTTVNGVDEILTTLEVLHKKARKEDVYFPLVGEINGCNPHCDTSSSEVAARELVNTDVVIGDNVLELPYRDRFNIVTSVIEHVGC LISESVLSAYHENRIGMENFRRLMWSIGGTATEPVLVNGLYKVDFKHRDVGKMMTGLIGDNPRIQGMVNF SQYEDLQLKLAWEKVEVNETC IALDNDEKLYVVDDYIVTHN                                                                                       |

|                    |                                                  |                                           |                                                                                                                                                                                                                                                                                                                                                                                                                                      |
|--------------------|--------------------------------------------------|-------------------------------------------|--------------------------------------------------------------------------------------------------------------------------------------------------------------------------------------------------------------------------------------------------------------------------------------------------------------------------------------------------------------------------------------------------------------------------------------|
| PP-PhiEL ORF11     | PhiEL_ORF11, putative ATP-dependent DNA helicase | <i>Pseudomonas aeruginosa</i> phage phiEL | QQRNSAKVRIVPKDITLKTITPQDTWKRIEHLRVGDQVLDRSGKPCQVIGIHPQGKRRLYRVITS DGRATDVGTEHLWTLKDYSNCLNLRALWNDYSTVDVINLKKKVKLQPLPAPVPGSEQDLPID PYVLGLIYCGQDQDKVVIIPTRTDAVKQYVVDHLPRGVTVIQGVANSCLERFDNQPYLFNREHG LFDQYLEAPLNARRDLQAFLDVRGKVGGRKVFIALNRVLGGQLAYLARSLGGTGKVTKNGVEI TLPEEVPFFKREENVFVFNRLIERVTFVGGDDCTCIEVDNSEQLYLTDDFIVTHN                                                                                                            |
| PP-PhiEL ORF39     | PhiEL_ORF39                                      | <i>Pseudomonas aeruginosa</i> phage phiEL | AGVLSKIKIPGGWKTMGNIIRVGVDEVVTPDGGTAKVLAVHPQGVTKVVRVHFKDGRYTDVSPDH LWKVRHHWCNDKAMAKLTREVEERVWRVITNDELKDYIGLSTKVYVQLIEPERNADKPKFIH PYVLGVLGDCISQKAVDITKPYQQLFDKVSLLPEHLECVWRPNRKGDEGPKTFGIRFKDRR SEQHINWHIRDGLKELGLYGMRSWGVKVIPEEYLHGSQKQRLLELLQGLLDTDGTVDKHKSVSFSS SSKLLSLGVQYLVRSLGGMARLQERTPHYTHNGEKREGRTDYRVYIRYPRPEELFLDHLKREERA VSHQHTETLRLQVTHIEERPDEETQCITIDHPDHLIITDDFIVTHN                                                   |
| PP-PhiEL ORF40     | PhiEL_ORF40                                      | <i>Pseudomonas aeruginosa</i> phage phiEL | MQPLYAKIKVPGGWKTMREMTVGTVEVIAADGTVTQVTGVYPHGKQPIYRHLHFEDGRYTDAGLDH LWKVFTEETQAWTVVNTRSVQTLTLLAKEPDGVFIPLCEPEDGPEKPFVTDQLEGSRQORLEHLRR LMDEKGYVRDDGSLFSFSEDEVESSTVQYLVRSLGGIARKVPSSTGLYRRRQYRVYIKHPRPEEL FTLTNKGGYLTSSKSGNQLKLRVNRNIEFIGEHEAQCSVAHPDRLYITDDFIVTHN                                                                                                                                                                     |
| SaP-SETP5 dpol     | DNA polymerase A (Pol I or family A)             | <i>Salmonella</i> phage SETP5             | CLHRHTQVLTDDGGFKDIMAVTSTDKVWSGEKWVNTKGAHLMGWKPVINVDGVLMTEDHKILTHS WKQAKQLVSNKYMMDRALIEGMDAWLSCASYQNDKADNYSSNVIIVERCLGGSIMTMSGRVKPL NATAAPLQKQKNIVNSISATKTQCRMMRTERDYSTGCPRRSREQQAPGIRVITKMGQEAASRYST SGGLIKGLFLDMFKLWKAGMTRTSKWIESTQVTTNLETFGLSAVLKTAGTDGKYLFSFNESMMQ PLPALLNLNGKLTycePVYDLIDVEDGNRFLIASDSGFLVAHN                                                                                                                    |
| SaP-SETP12 dpol    | DNA polymerase A (Pol I or family A)             | <i>Salmonella</i> phage SETP12            | CLHRHTQVLTDDGGFKDIMAVTSTDKVWSGEKWVNTKGAHLMGWKPVINVDGVLMTEDHKILTHS WKQAKQLVSNKYMMDRALIEGMDAWLSCASYQNDKADNYSSNVIIVERCLGGSIMTMSGRVKPL NATAAPLQKQKNIVNSISATKTQCRMMRTERDYSTGCPRRSREQQAPGIRVITKMGQEAASRYST SGGLIKGLFLDMFKLWKAGMTRTSKWIESTQVTTNLETFGLSAVLKTAGTDGKYLFSFNESMMQ PLPALLNLNGKLTycePVYDLIDVEDGNRFLIASDSGFLVAHN                                                                                                                    |
| SaP-SETP3 dpol     | DNA polymerase A (Pol I or family A)             | <i>Salmonella</i> phage SETP3             | CLHRHTQVLTDDGGFKDIMAVTSTDKVWSGEKWVNTKGAHLMGWKPVINVDGVLMTEDHKILTHS WKQAKQLVSNKYMMDRALIEGMDAWLSCASYQNDKADNYSSNVIIVERCLGGSIMTMSGRVKPL NATAAPLQKQKNIVNSISATKTQCRMMRTERDYSTGCPRRSREQQAPGIRVITKMGQEAASRYST SGGLIKGLFLDMFKLWKAGMTRTSKWIESTQVTTNLETFGLSAVLKTAGTDGKYLFSFNESMMQ PLPALLNLNGKLTycePVYDLIDVEDGNRFLIASDSGFLVAHN                                                                                                                    |
| SaP-SETP3 Helicase | ORF4, DEAD-like helicases superfamily            | <i>Salmonella</i> phage SETP3             | CLKRGTEVIMFDGTTKKVEDVIVGDVLMGPDSTPRNVLSLGRGEMMYEVKPKRGESYTVNESH ILSLRTTGTGIAKGSWPDNTVFDISVRDWLKLPKYVTGPNGLKGVWVDFPRKEQDEALLPPY LMGLWLDGDTSSSGAITSGENEKEIRAYLESYAARNGMQIRKEGLTWSISHGNTGHKKHGFTHA LKSAQVNLNKHIPHNYKCGDRRQRLLELLAGLLDSGYCDLSKAGFDWISVSRERLADDFCYLCRS LGFAAYKKKTCKRCANTDVWGDYFRVSVSGDFSEVFFVRGRHQNLPKRNINKNVLVNGVIESITP VGVDDYFGFTIDGDSRFLLDGFTVTHN                                                                      |
| ShP-Sfv-5 Primase  | DNA primase, Helicase                            | <i>Shigella flexneri</i> 5 str. 8401      | ACPLNEPILLADGTWTTTHGNVKIGDQVASVDGNPSTVTGIFPQGVDRVYRVTFEDGRYVDCAGD HLWEVTSRGTGKEKRRVIDTFGLKRLSETKRHKNGVRIPEITGDFGDHSEPLAWVIGSLLGDG SLSNGSVKFSNVEPYMIERMKAELPDYNSFGDGKDWLISSTARQVNPMLTIRGYGLMGCTAKN KFI PRVFFSANKSTRIGMLCGLLETDGYVEKDGTLVFSASSEELRNGVQVLVNSLGGSCRTRVK TGVITYYKDDKQHGMDSYEARIRLRTREIREAIRSPRLNGLRTAHRFEFGCGVFRNVEKIGNAEC LICIMVDHPRHLYVTRGYVATHN                                                                        |
| SoP-SO1 dpol       | DNA polymerase A (Pol I or family A)             | <i>Sodalis</i> phage SO-1                 | CLHRHTQVLTNGGFKDIMAVTSTDKVWNGEKWVSTQGAHLMGWKPVIVDGVLMTEDEHKILTHS WKEARQLVSDRCTMARALARGMDAWLSCANYQNRGTDNCPNVIAERCQDASGMMTSEGVKHP NATSAQLKRQSGIVNSIFATMTQCQTMRTERGCTGCRQYHERQTPAPKGIKTTAVVGLPYVT NGREIKGRFFSTFKRWTAGIIPTSKWTGSIQTATMSLETFLSAVSRKTAVTGAACPSFSESTMK PLPALLNLNGKLTycePVYDLIDVEDGNRFLIASKSGFLVAHN                                                                                                                          |
| StP-Twort ORF6     | TwortORF006                                      | <i>Staphylococcus</i> phage Twort         | CISMDSMILTTEGYKSLQEIFETQGVKVDNKEKVIELKYPLINRYGDVEYTSHTFKNGEKPTKR IKTNGIELVNTYNHPLLVREGFNLIWKKSEDI EVGDILVSRVGDHQFGNNNTVNEEEAYALG CMVADSYLGSYSRLSFSNDKKEILDVSKFWNTFSNKEVYDYTYKESGITIHLHDTNKTKEFH DKYKIEYGVAKDKKIPKIMESPENIQALFVSGYLECESSISEKNLEVTASAKDLLKDLQLILS NIGIVSTNKEKVVKKYKHNYRILVNRKELIKLLPLRFETQQRKNQKENFLSNNTKIKSSYG NTIEGSRYLLKKYRDSLNI DKKEFSKYLSDTITIDRLREVISLYPDGDKERELELFENVVNNNI YYQKVEQVLEGEIIPTFDVCMPKTHSFIANTIVNHN |

**Supplementary Table 2 | Characteristics of the inteins analyzed in this study**

| <b>Intein</b>                              | <b>Name used<sup>a</sup></b> | <b>Organism</b>                                                                   | <b>Extein</b>                                                                   | <b>Junction sequence<sup>b</sup></b> | <b>Intein type</b>              | <b>Evidence<sup>c</sup></b> | <b>Source</b> |
|--------------------------------------------|------------------------------|-----------------------------------------------------------------------------------|---------------------------------------------------------------------------------|--------------------------------------|---------------------------------|-----------------------------|---------------|
| <i>SspDnaB</i> <sup>Δ275</sup><br>M86      | M86                          | <i>Synechocystis</i> sp.<br>PCC 6803                                              | Replicative DNA<br>helicase (DnaB)                                              | VDA/SDL                              | Artificially<br>mini            | E                           | 1             |
| <i>Npu<sup>N</sup>/Ssp<sup>C</sup>DnaE</i> | NpuSsp                       | <i>Nostoc punctiforme</i><br>PCC73102 and<br><i>Synechocystis</i> sp.<br>PCC 6803 | DNA polymerase<br>III alpha subunit<br>DnaE                                     | GGK/CWN                              | Chimeric,<br>Naturally<br>split | E                           | 2,3           |
| gp41-1                                     | gp41-1                       | GOS metagenomic<br>dataset                                                        | gp41 DNA<br>helicase                                                            | SGY/SSS                              | Naturally<br>split              | E                           | 4-6           |
| gp41-8                                     | gp41-8                       | GOS metagenomic<br>dataset                                                        | gp41 DNA<br>helicase                                                            | LNR/SAV                              | Naturally<br>split              | E                           | 4-6           |
| NrdJ-1                                     | NrdJ-1                       | GOS metagenomic<br>dataset                                                        | ribonucleotide<br>reductase (RNR)<br>class II                                   | NPC/SEI                              | Naturally<br>split              | E                           | 4-6           |
| IMPDH-1                                    | IMPDH-1                      | GOS metagenomic<br>dataset                                                        | Inosine-5'-<br>monophosphate<br>dehydrogenase<br>(IMPDH)                        | GGG/SIC                              | Naturally<br>split              | E                           | 4-6           |
| <i>SspDnaX</i> <sup>Δ297</sup>             | SspDnaX                      | <i>Synechocystis</i> sp.<br>PCC 6803                                              | DNA polymerase<br>III alpha subunit<br>DnaX                                     | IDE/CHT                              | Artificially<br>mini            | E                           | 7             |
| <i>SspGyrB</i> <sup>Δ279</sup>             | SspGyrB                      | <i>Synechocystis</i> sp.<br>PCC 6803                                              | DNA gyrase<br>subunit B (GyrB)                                                  | AGG/SAK                              | Artificially<br>mini            | E                           | 7             |
| <i>TerThyX</i> <sup>Δ134</sup>             | TerThyX                      | <i>Trichodesmium</i><br><i>erythraeum</i> IMS101                                  | Thymidylate<br>synthase X                                                       | IGC/SFD                              | Artificially<br>mini            | E                           | 7             |
| <i>TvoVMA</i>                              | TvoVMA                       | <i>Thermoplasma</i><br><i>volcanium</i> GSS1                                      | Vacuolar ATPase<br>(H <sup>+</sup> -transporting<br>ATP synthase),<br>subunit A | GSK/TVI                              | Naturally<br>mini               | E                           | 8             |
| <i>PhoRadA</i>                             | PhoRadA                      | <i>Pyrococcus</i><br><i>horikoshii</i>                                            | RadA DNA repair<br>protein                                                      | SGK/TQL                              | Naturally<br>mini               | E                           | 8             |
| CroV RIR1                                  | Cro-RIR1                     | <i>Cafeteria</i><br><i>roenbergensis</i> virus<br>BV-PW1                          | Ribonucleoside-<br>diphosphate<br>reductase, alpha<br>subunit                   | VNQ/SGR                              | Bifunctional                    | T                           | 9             |
| CroV RPB2                                  | Cro-RPB2                     | <i>Cafeteria</i><br><i>roenbergensis</i> virus<br>BV-PW1                          | DNA-directed<br>RNA polymerase<br>beta (II) subunit 2                           | DKF/STK                              | Naturally<br>mini               | T                           | 9             |
| CroV Top2                                  | Cro-Top2                     | <i>Cafeteria</i><br><i>roenbergensis</i> virus<br>BV-PW1                          | DNA<br>Topoisomerase<br>IIA                                                     | GSK/CSN                              | Bifunctional                    | T                           | 9             |
| CIV RIR1                                   | CIV-RIR1                     | <i>Chilo iridescent</i> virus                                                     | Ribonucleoside-<br>diphosphate<br>reductase, alpha<br>subunit                   | SNL/CSE                              | Bifunctional                    | E                           | 9,10          |
| CP-P1201 Thy1                              | CP-Thy1                      | <i>Corynebacterium</i><br>phage P1201                                             | Putative<br>thymidylate<br>synthase                                             | KHH/SVL                              | Bifunctional                    | T                           | 9             |
| Ama MADE823                                | Ama-Ter                      | <i>Alteromonas</i><br><i>macleodii</i> 'Deep<br>ecotype'                          | Hypothetical,<br>Phage-related<br>terminase                                     | HGK/SEL                              | Bifunctional                    | T                           | 9             |
| BsuP-M1918<br>RIR1                         | BsuP-RIR1                    | <i>Bacillus subtilis</i><br>M1918 (prophage)                                      | Ribonucleoside-<br>diphosphate<br>reductase, alpha<br>subunit                   | SNL/CSE                              | Bifunctional                    | T                           | 9             |
| CbP-C-St RNR                               | Cbp-RNR                      | <i>Clostridium</i><br><i>botulinum</i> phage C-<br>St                             | Ribonucleotide<br>reductase,<br>Anaerobic, RNR,<br>class III                    | ASC/CRL                              | Bifunctional                    | T                           | 9             |
| Ckl PTerm                                  | Ckl-Ter                      | <i>Clostridium kluuyveri</i><br>DSM 555                                           | Phage terminase,<br>large subunit                                               | NGK/TTL                              | Bifunctional                    | T                           | 9             |

|                     |                  |                                           |                                                     |         |                                  |   |       |
|---------------------|------------------|-------------------------------------------|-----------------------------------------------------|---------|----------------------------------|---|-------|
| Cth-ATCC27405 TerA  | Cth-Ter          | <i>Clostridium thermocellum</i> ATCC27405 | Phage terminase-like protein, large subunit         | NGK/SEL | Bifunctional                     | E | 9,11  |
| EP-Min27 Primase    | EP-Pri           | Enterobacteria phage Min27                | DNA primase, Helicase                               | HGK/TEV | Bifunctional                     | T | 9     |
| LLP-KSY1 PolA       | LLP-Pol          | <i>Lactococcus</i> phage KSY1             | DNA polymerase family A, gp96                       | AKA/CNF | Naturally mini                   | T | 9     |
| LP-phiHSIC Helicase | LP-Hel           | <i>Listonella pelagia</i> phage phiHSIC   | Helicase                                            | ATG/CGK | Naturally mini                   | T | 9     |
| MP-Be DnaB          | MP-B-DnaB        | Mycobacteriophage Bethlehem               | DnaB helicase, gp10                                 | QDQ/TKN | Bifunctional                     | E | 9,12  |
| MP-KBG gp53         | MP-K-gp53        | <i>Mycobacterium</i> phage KBG            | gp53                                                | NHD/SRA | Naturally mini                   | T | 9     |
| MP-Catera gp206     | MP-C-gp206       | Mycobacteriophage Catera                  | gp206                                               | ELK/TQN | Bifunctional                     | E | 9,13  |
| MP-McJw1 DnaB       | MP-M-DnaB        | Mycobacteriophage CJW1                    | DnaB helicase                                       | NGK/TEL | Bifunctional                     | T | 9     |
| PP-PhiEL ORF39      | PP-Phi           | <i>Pseudomonas aeruginosa</i> phage phiEL | PhiEL_ORF39                                         | AGK/SLT | Bifunctional                     | T | 9     |
| SaP-SETP3 dpol      | SaP-dpol         | <i>Salmonella</i> phage SETP3             | DNA polymerase A (Pol I or family A)                | GKA/CEL | Naturally mini                   | T | 9     |
| SaP-SETP3 Helicase  | SaP-Hel          | <i>Salmonella</i> phage SETP3             | ORF4, DEAD-like helicases superfamily               | SGK/TSS | Bifunctional                     | T | 9     |
| NrdA-2              | NrdA-2           | GOS metagenomic dataset                   | ribonucleotide reductase (RNR) class I              | SNL/CNE | Naturally split                  | T | 4,5   |
| <i>Pfu</i> RIR1-1   | <i>Pfu</i> -RIR1 | <i>Pyrococcus furiosus</i>                | Ribonucleoside-diphosphate reductase, alpha subunit | GGG/TGL | Bifunctional, artificially split | E | 14,15 |
| <i>Mja</i> KIbA     | <i>Mja</i> -KIbA | <i>Methanococcus jannaschii</i>           | KIbA, kilB operon ORF A                             | HDG/CSG | Naturally mini                   | E | 16,17 |

<sup>a</sup> As used in this study

<sup>b</sup> Extein's amino acid residues flanking the intein insertion site (-3, -2, -1 / +1, +2, +3)

<sup>c</sup> Experimental (E)/Theoretical (T)

**Supplementary Table 3 | Mini-intein protein sequences and synthesized DNA sequences**

| <b>Intein</b>  | <b>Protein sequence<sup>a</sup></b>                                                                                                                                                                        | <b>Synthesized DNA sequence<sup>b</sup></b>                                                                                                                                                                                                                                                                                                                                                                                                                                                                                                                                                        |
|----------------|------------------------------------------------------------------------------------------------------------------------------------------------------------------------------------------------------------|----------------------------------------------------------------------------------------------------------------------------------------------------------------------------------------------------------------------------------------------------------------------------------------------------------------------------------------------------------------------------------------------------------------------------------------------------------------------------------------------------------------------------------------------------------------------------------------------------|
| <b>M86</b>     | CISGDSLISLASTGKRVPIKDLLGEKDFEIWAIN<br>EQTMKLESAKVSRVFTGKLLVYTLKTRLGRTIK<br>ATANHRFLTIDGWRKRLDELSLKEHIALPRKLESS<br>SLQLAPEIEKLPQSDIYWDFIVSITETGVVEVFD<br>LTVPGLRNFVANDIIVHN                                 | TGCATCTCGGGAGATAGTTTGTACAGCTTGGCGAGCACAGGGAAAAGAGTTCCATTATAAGGATT<br>TGTTAGCGCAAAAAGATTTTGAATATGGGCAATTAATGAACAGACGATGAAGCTGGAATCAGC<br>TAAAGTTAGTCGTGTATTTTGTACCGGCAAAAAGCTAGTCTATACTCTAAAACTCCGACTAGT<br>AGAACTATCAAGGCAACAGCAAATCATAGATTTTAACTATTGATGGTTGGAAAAGATTAGATG<br>AGCTATCTTTAAAAGAGCATATTGCTCTACCCGTAACCTAGAAAAGCTCCTCTTTACAATTGGC<br>ACCAGAAAATGAAAAGTTGCTCAGAGTGATTTTACTGGGACCCATCGTTTCTATTACGGAG<br>ACTGGAGTCGAAGAGGTTTGTATTGACTGTGCCAGGACTACGTAACCTTTGTCCCAATGACA<br>TCATTGTACATAAC                                                                                                |
| <b>NpuSsp</b>  | CLSYETEILTVEYGSPLIGKIVEKRIECTVYSVD<br>NNGNIYTPVAQWHDREGEVFEYCLEDDGLIRA<br>TKDHFMTVDGQMLPIDEIFERELDLMRVDLNP<br>MVKVIGRRSLGVQRIFDIGLRQDHNFLLANGAIA<br>AN                                                     | TGCTGAGCTATGAAACCGAAATCTGACCGTGAATATGGCAGCCTGCCGATTGGCAAAATTG<br>TGGAAAACGCATTGAATGCACCGTGTATAGCGTGGATAACAACGGCAACATTTATACCCAGCC<br>GGTGGCGCAGTGGCATGTCCGGCGAACAGGAAGTGTGTAATATTGCTGGAAGATGGCAGC<br>CTGATTCCGGCGACCAAGATCATAAATTTATGACCGTGGATGGCCAGATGCTGCCGATTGATG<br>AAATTTTGAACGCAACTGGATCTGATGCCGCTGGATAACCTGCCGAACATGGTGAAGTGTAT<br>TGCCCGCCGAGCCTGGCGCTGACGGCATTGTTGATATTGGCTGCGCCAGGATCATAACTTT<br>CTGCTGGCGAACGGCGCATTTGCGCGCAAC                                                                                                                                                           |
| <b>gp41-1</b>  | CLDLKTQVQTPQGMKEISNIQVGDVLSNTGYNE<br>VLNVFPKSKKSKYKIFLEDGKEIICSEEHLPFTQ<br>TGMNISGGKKEGMCLYVKEMMLKKILKIEELDE<br>RELIDIEVSGNHLFYANDILTHN                                                                    | TGCTGGATCTGAAAACCCAGGTTGACACACCGCAGGGTATGAAAGAAATTTCAAATATTGAGG<br>TGGGTGATCTGGTCTGAGCAATACCGGTTATAATGAAGTGTGTAATGTTTCCGAAAAGCAA<br>AAAAAAAAGCTATAAATACCCCTGGAAGATGGCAAGAAATCATTGTAAGCAAGAACACCTG<br>TTTCCGACCCAGACCGGTGAAATGAATATTAGCGGTGGTCTGAAAGAAGGATGTCGCTGTATG<br>TTAAAGAAATCTGAAATAAATCCTGAAAATCGAGAACTCGAAGAACTGAAAGTGAATGTA<br>TATTGAAGTGTAGCGGTAAACACCTGTTCTATGCCAATGATATTCTGACCCATAAT                                                                                                                                                                                                   |
| <b>gp41-8</b>  | CLSLDTMVTNGKAIERDVKVGDWLESECGPVQ<br>VTEVLPRIKQPVFIEVLKSGKKIRVSNHKKFPFK<br>DGLKTI NSGLKVDGDFLRSRAKMCIEFENEIDWDE<br>IASIEYVGVETIDINVNTDRLFFANGILTHN                                                          | TGCTGAGCCTGGATACCATGGTGTGTTACCAATGGTAAAGCCATTGAAATTCGTGATGTGAAAG<br>TTGGTGTATGGCTGGAAGCGAATGTGGTCCGGTTCAGGTTACCGAAGTTCCTGCCGATTATCAA<br>ACAGCCGGTTTTGAATTTGTAATTTGCTGAAAACGGCAAAAATCCTGTTAGCCGCAATCATAAA<br>TTCCGACCAAGATGGCTGAAAACCATTAATAGCGGTCTGAAAGTGGCGGATTTTCTGCGTA<br>GCCGTGCAAAAATGTGTGAAATCTTGAACAGGATGACTGGGATGAAATGCCAGCATGTA<br>ATATGTTGGTGTGGAAGAAACCATCGATATAACGTGACCAATGATCGTCTGTTTTTGGCAAT<br>GGTATTCTGACCCATAAT                                                                                                                                                                   |
| <b>NrdJ-1</b>  | CLVGSSEIITRNYGKTTI KEVVEIFDNDKNIQVL<br>AFNTHTDNIEWAPIKAAQLTRPNAELVEIDTL<br>HGVTIRCPDPHFVYTKNRGYVRADELTDDELV<br>VAIMEAKTYIGLKSARKIVSNEDTYDIQTSTHNF<br>FANDILVHN                                             | TGCTGGTGGTAGCAGCGAAATCATTACCCGTAATTTATGGTAAAACCCACCATCAAAGAAGTGG<br>TCGAGATCTTCGATAACGACAAAAAATTAGGTTGCTGGCTTTAATACCCATACCCGATAATAT<br>TGAATGGCCAGGATTAAGCAGCACAGCTGACCCGTCGCAATGCAAGTGGTGAATGAAATGGAA<br>ATTGATACCTGTGATGGTGTGAAAACCATTCGTTGTAACCCGATCCTGTGTATACCAAAA<br>ATCGTGGTATGTTGCTGCAAGTGAATGACCGATGATGATGAACTGGTGTGCAATTTATGGA<br>AGCCAAAACCTATATCGGCAACTGAAAAGCCGTAATTTGTGAGCAACGAGGATACCTATGAT<br>ATTCAGCACAGCCACCAATAACTTTTCGCCAATGATATTCTGGTGCATAAT                                                                                                                                   |
| <b>IMPDH-1</b> | CFVPGTLVNTENGLKIEIKVGDVFSHTGKIQ<br>EVDVTLIFDRDEEIIISINGIDCTKNHEFVVIDKE<br>NANRVNEDNIHLFARVWHAEEELDMKKHLLLELEM<br>KFKLKEITSIETKHYKGVHDLTVNQDHSYNVRG<br>TVVHN                                                | TGTTTTGTTCCGGGTACACTGGTGAATACCGAAAATGGTCTGAAAAAATCGAAGAAATCAAAG<br>TGGGCGACAAAGTGTTTAGCCATACCCGTAACCTGCAAGAAGTGTGATACCTGATCTTTGA<br>TCGTGATGAAGATATTATGATCAACCGTATCGACTGACCAAAAACCATGAGTTTTATGTTG<br>ATCGACAAAGAAAATGCCAATCGCTGAAACGAGATACATTAACCTGTTGCAAGTGGGTTT<br>ATGCCAAGAACTGGATATGAAAAACATCTGCTGATCGAGCTGAAATGAAATCAAACCTGAA<br>AGAGATCACCAGCATGAAAACCAACTATAAAGGCAAGTTCATGATCTGACCGTGAATCAG<br>GATCATAGCTATAACGTTCTGTCACCGTGTTCATAAT                                                                                                                                                        |
| <b>SspDnaX</b> | CLTGDSQVLRNGLMSIDNPQIKGREVLSYNETL<br>QQWEYKVLRLDRGEKQTLISKTKNSTVRCTAN<br>HLIRTEQGWTRAENITPGMKILSPAPQWHNTFEE<br>VESVTKGQVEKVDLEVEDNHNFFVANGLLVHN                                                            | TGCTTAAACGGGGACTCACAAGTTTGAACCCGCAATGGCTTAATGTCCATTGACAATCCCCAAA<br>TAAAAGGGCGAGAAGTTCGAGCTACAACGAACTCTACAGCAATGGGAATATAAAAAAGTTTT<br>AAGATGGCTTGACAGAGGCGAAAAGCAAACTTGTCTATTAAGCAAAAAATTTACAGTACCG<br>GTACCGGTAACCATTTAATCAGAAGTGAACAAGGATGGCAGAGCGGAAAACCATCACTCCCG<br>TATGAAGATACATATCCCTGCGCCGCAATGGCATACAAAATTCAGGGAAGTTGAGTCCGTCAC<br>TAAGGGTCAAGTGGAAAAGTTTATGACCTGGAGGTGGAAGATAATCACAAATTTGTTGCCAAT<br>GGCTTACTAGTCCATAAC                                                                                                                                                                  |
| <b>SspGyrB</b> | CFSGDTLVALTDGRSVSFEQLVEEEKQKQNFY<br>TIRHDGSI GVEKI INARKTKTNAKVIKVTLDNGE<br>SIICTPDHKFMLRDGYSKAMDLDLDDSLMPLHR<br>KISTTEDSGHAMEAVLNYNHRIVNIEAVSETIDV<br>YDIEVPHTHNFALASGVFVHN                               | TGTTTTCTGGAGATACATTAGTCGCTTTAAGTGTGGTGGTACGCTTACCTTTGAGCAATTTG<br>TTGAAGAAGAAAACAAAGGAAAACAAAATTTGTTATACCATCCGCCATGATGGTCTATAGG<br>GGTTGAAAAAATCATCAATGCCGCAAAAACAAAATAATGCGAAGGTAATCAAGGTTACGTTG<br>GACAAATGGTGGTCTATTTATGACCCCGGATCATAAATTCATGTTGCGGGATGGGAGCTACA<br>AATGTGCGATGGATTTAATCTCGATGATTCGTTAATGCGCTTACACCGAAAAATTCGACTAC<br>GGAAGATCTGGTATCGGATGGAAGCAGTATTAATTAACATCACAGAATTGTAATATTTGAA<br>GCTGTGTGAGAAAATTCGATGTTTATGATATTGAGGTTCCCCACACCCAAATTTGCTTTGG<br>CAAGCGGAGTGTGTTGTCATAAC                                                                                                 |
| <b>TerThyX</b> | CLSGNTKVRFRYSSSSQEAKEYEETIEKLANLWH<br>YKSKNQYTSKDAKCMQENISSRNIFTLDTQTNQI<br>VSSKITNIYINGEKETYTIKTVSGKEIRATLEHQ<br>FWTNQWKRLLKDFNNSQLCEVQLAGVFVEIESI<br>EKFGKEITYDLEVEHPEHNFIANGLLVHN                       | TGTTTGTGGGCAATACAAAAGTTAGATTTAGGTATTCGCTTTCATCCCAAGAAGCGAAATATT<br>ATGAGGAAACAATGAAAAATTAGCTAATTTATGGCATTACGGGAGCAAAAATCAATATACTTC<br>TAAAGATGCAAAAATGATGCAAGAAAATATATCTAGCCGTAATTTTACTCTGGATACCCCAA<br>ACTAACCAAAATGTTCTAGCAAAATACCAACATATATTAATGGTGAAGAAGAACTTACA<br>CAATAAAAATGTTTCTGGTAAGGAAATAAGAGCTACCCTAGAACACCCAGTTTGGACTAACCA<br>AGGGTGGAAACGATAAAAGATTTAATAACAGCATCAATTTATGAAATGCAATTTAGCGGGT<br>GTTTTGTAGAGATAGATACTATTGAAAATTTGGCAAGAATTAATCTATGATCTTGAAGTCCG<br>AACACCCAGACATAATTTATAGCCAATGGTTAGTTGTTCAATAAT                                                                         |
| <b>TvoVMA</b>  | CVSGETPVYLADGKTIKIDLYSSERKKEDNIVE<br>AGSGEBEIIHLKDPIDQIYSVDGTVRSRSLLYK<br>GKSSYLVRITIGRRSVSVPVHKLFLVLEKIE<br>EVMASNLKVGDMIAA VAESESEARDGCMSEECVM<br>EAEVYTSLEATFDRVKSIAIYKGFDFVYDLSVPE<br>YGRNFIDGEGLLVLHN | TGCGTATCAGGTGAAACACCGTTTACCTTGGCGATGGCAAGACAATAAAAAATAAGGATCTAT<br>ACAGTTCTGAGAGAAAAAGAGATAACATTTGTTAGGCTGGTTCGGGAGAGAGATATAACA<br>TCTAAAAGATCCCAATCAATATATTTCTTATGTGGACGGGACCATAGTCAGGAGCAGATCAAGA<br>CTCTATACAAGGGCAAGAGCTCTATCTTGTGAGGATAGAAACTATTGGCGGAAGATCCGTA<br>GCGTTACACCGATTCAAACTCTTTGCTCTACGGAAGAGGTTATCGAAGAGGTTATGGCCTC<br>CAACCTAAAGTATGGCAGCATGATGCTGCTGTAGCAGAAAAGCGAATCTGAAGCAAGAGACTGC<br>GGAATGAGCGAGGAAATGGCTGATGGAAGCAGAAGTTTATACGTCACCTTGAAGCAGCATCGATA<br>GAGTAAAGTCTATAGCGTACGAGAAGGTTGATTTGATGTATACGATCTTCCGTACCCAGAATA<br>CGGCAGGAACCTTATAGCGGAGAGGACTTCTCGTACTTCAACAAC |

|           |                                                                                                                                                                                              |                                                                                                                                                                                                                                                                                                                                                                                                                                                                                                                                                                                                                                    |
|-----------|----------------------------------------------------------------------------------------------------------------------------------------------------------------------------------------------|------------------------------------------------------------------------------------------------------------------------------------------------------------------------------------------------------------------------------------------------------------------------------------------------------------------------------------------------------------------------------------------------------------------------------------------------------------------------------------------------------------------------------------------------------------------------------------------------------------------------------------|
| PhoRadA   | CFARDTEVYENDTVPHMESIEEMYSKYASMNGE<br>LPFDNGYAVPLDNVVFYTLDIASGEIKKTRASYI<br>YREKVEKLEIKLSSGYSKLVTPSHVLLFRDGL<br>QWVPAEAVKPGDVVVGVREEVLRRIISKGELEF<br>HEVSSVRIIDYNNWVYDLVIPETHNFIAPNGLVL<br>HN | TGCTTTGCTAGGGATACCGAAGTTTATTATGAAAACGATACGGTACCACACATGGAATCAATTG<br>AGGAGATGTATAGTAAATACGCCCTCGATGAATGGGGAATTACCATTCCGATATGGTTACGCAGT<br>TCCATTAGATAAATGCTTTGTGTACACGTTGGACATCGTAGTGGTAAATTAAGAAAACCGAGG<br>GCTTCATACATCTATCGCGAGAAGGTTGAGAACTCATAGAGATAAACTATCCAGTGGTACT<br>CCCTTAAGGTTACTCCCTCTCACCAGTTCCTCTTTAGAGATGGCTGCAATGGTCCCGC<br>TGCTGAAGTTAAACCTGGAGATGTTGTTGTTGGTGTAGGGAAGAGTACTGAGAAAGAAATA<br>ATATCCAAGGGAACCTGAATTCATGAGGTTCCCTCGTAAGGATAAATAGATAAATAAAT<br>GGGTCTACGACCTTGTAAATCCGGAAACCCACAACCTCATAGCTCCAATGGACTGTTCTCCA<br>TAAT                                                                                  |
| Cro-RIR1  | CFTPDPIFTNDGDFVSIENIKPHMKVMTSDGTFR<br>NVNKIFKNNVKNILKINTHSLLEEIKCTKEHDI<br>LIYQINNESNYEQITHYIETNKYTPNFVKASEL<br>KVGDFMVIKIQIGSAGSAAGSGCILTKIENIDM<br>CEYSGVYDLNIEENHNYLTSSGIVHN              | GCCTCCTCCGAGCGGATGTACCCCGAGGACGTGAATCAGTGCTTTACGCCCGACACCAATTT<br>TTACGAACGATGGCTTTGTATCGATTGAAAACATAAAGCCTCATATGAAGGTTATGACCTCTGA<br>CGGTACGTTCCGCAATGTTAATAAAATTTTAAAAACAACGCTCAATAAGAAATATTCTAAAGATC<br>AATACGACTCACCTCATAGAGAAATCAAATGTACAAAAGAGCATGATATTTAATCTATCAGA<br>ATATTAATAATGATCTAAGTACGAAACAAATACACATTTATTAATGAAACGAAATAATATCTCC<br>TAACTTTGTAAGAGCATCCGAGTTAAAGGTTAGGTGATTTTACATGGTAAATCCCGAAAATCCGAT<br>GGTCCGCGGGGAGCGCGCGGTAGCGGATGATACGACGAGATGCAAAACATTTGATATGT<br>GTGAGTACTCCGCTATGTCTATGATTTGAACATCGAAGAAAACCAAAATTTTAACTCCCTC<br>GGTATTGTTTATAACCCGGGAGGGCGCCCTGAAGGGCGAGATCAAGCAGAGG                        |
| Cro-RPB2  | CQKYDVLVTLHGLWIKLGEIDITIHKVATLDKHD<br>NIYYVPTSKFEFDYDGFYEHKNSIDIECTIN<br>HKLYCKYLNSSFTLIPADKQVYKVKIMKMNENE<br>VIWTDPSAGSAAGSGSKEQIHNYKGVYICIEVP<br>DSHIYMKTSSTPPVWIGN                        | GCCTCCTCCGAGCGGATGTACCCCGAGGACGATAAATCTGCCAGAAATATGATACACTGGTAC<br>TTACTCACCTGGGATGGATCAAACCTGGCGAAATCGATATAACTATTCAAAAGTGTCTAGCTT<br>GGACAAGCAGATAAATCATCTACGTTTATCTACGTTAAATTTGAATTTGACTATGACGGG<br>GACTTTTACGAGCATAAAAATAATAGCATCGATATGAATGCAAAATTAATCATAAATATACT<br>GCAAAATACAACCTGAGCTCATCTTACCCTGATTCAGCAGATAAAGTGTATGGTAAACAAAGT<br>GATTATGAAAATAATGAAAATGAAGTGTCTGGACGGATCCGGGTTCTGCTGACAGCGCGACCC<br>GGTCCGGGAGTAAAGAACAAAATTCACAACATAAAGGCAAAAGTGTATTTGATAGAAAGTCCAG<br>ATTCCCATATTTATATATGAAAGACAGCTCTATCACTCCACCAGTTTGGATAGGCAATTCAC<br>CAAAGGGCCCTGAAGGGCGAGATCAAGCAGAGG                                              |
| Cro-Top2  | CISSDTNVLIWNSKISKAKDIQIGDILVDDGN<br>KRNVIDVSPGKQMYKI IQSKGENYSVNNHTLT<br>LMMPLHKVINSNNKLLWWDNVYKIIKSKPID<br>VQENKISDDEILLNSVYHDRGSAGSAAGSGLDSP<br>GYITVEKDGIDYVSIIVDVTNNQRFINDFTVT<br>HN     | GCCTCCTCCGAGCGGATGTACCCCGAGGACGGCAGTAAAGTGTATATCCTCCGATACCAACGTC<br>TGATATGGAACAGTAAATCTCTAAAAAGCCAAAGACATTAATCGGTGATATCTGGTAGG<br>TGACGATGGTAAACAGCGCAATGTTATCGATGTAGCTTTGAAAAGGACAGATGTACAAAATC<br>ATTCAGTCCAAAGGTAATAATAGCGTTAAATACCAACCACTACTCTACGCTGATGATGCCAC<br>TGACAAAAGTAAATAGCAATAGTAAACAATAAGCTGAAATTAATCTGGTGGGATAATGTGTATAA<br>AATTTAATCCAAACCGATTGATGTGCAAGAAAACAAAATAGCGATGATGAAATCTCCTG<br>AACAGTGTCTATCATGACCGCGCTCAGCCGGTAGTCCCGCTGGTCCGGGCTGGATTCGCCAG<br>GGTATATCAGCGTTGAGAAAGATGGTATTGGCGATTATGTGAGTATTACAGTGATACAGCAGC<br>GAATCAACGATTTCTGATTAACGATTTTACGGTACGCATAATGCTCAAACGGCCCTGAAG<br>GGCGAGATCAAGCAGAGG |
| CIV-RIR1  | CVAPETMILTEGQFPKIDLEGIKVVWNGNEFS<br>SVTVVKTGTEKELLELELSNGCTLSCTPEHKFII<br>VKSYTEAKKQKTDNNAIANAERVDQDLKPRMKL<br>IKFDLPTLFGNSGAGSAAGSGRFVVELKVNKTG<br>RVDDTYCFTEPINHAGVFNGILTGQ                | GCCTCCTCCGAGCGGATGTACCCCGAGGACTCGAATCTCTGCGTTGACCCGAAACCATGATCT<br>TGACCGAAGACGCTCAGTTCCGATTAAGACCTGGAGGGGAAGATAAATAGGTTTGAAGTGG<br>CAACGAATTTAGCTCTGTCACAGTTGTAAGACTGGCAGTGAAGAAAGAGCTGCTGGAGGTGGAG<br>TTGAGTAATGGTGTACATTAAGCTGACTCCGGAACATAAATTTATCATTGTAAAAGTTTACA<br>CCGAAGCAAAAACAAAACCGATGATACCGCATGCAATGCGCAATGCTGATGACCGCGCA<br>GGATTTGAAACCTAGAATGAAGCTAATCAAAATTCGATCTGCCAGCTGTTTGGTAATAGCGGG<br>AGTGGCGGGAGCGCAGCAGTTCGGGACGTTTGTGTTGAGTCTGAAAGGTGAATAAACCGGGT<br>GAGTCGACGATAGCTATTGCTTTACGGAAACCGATTAACTCATGCGGGGGTGTAAACGGGATCCT<br>GACCGGTCAATGCTCAGAGGGCCCTGAAGGGCGAGATCAAGCAGAGG                                 |
| CP-Thy1   | CYSSDTEVLTESEGWRWEEVSMNDSFATLSASGQ<br>VEYQYQSEVIQEEYQGDVRAKAKGVDLLVTPNH<br>KMLACITTTTRAGRRKENFSLIPADQLIGVSHAYK<br>KDGDRWAGSAGSAAGSGASKTYSYWEKYSQVY<br>CATVPHNTLYVRRNRKGPVWSGN                | GCCTCCTCCGAGCGGATGTACCCCGAGGACAGCATCACTGTTATAGTTCGACACTGAGGTCC<br>TGACAAGCGAAGGCTGAAAACGTTGGGAAAGTAAAGTATGAACGATTCCTTCCGCTACTTTAAG<br>CGCATCCGGCAGGTAGAGTACCAGTACCCTAGCGAGGTCATTCAGGAAGAATATCAGGGGGAC<br>ATGGTAAGAGCTAAAGCCAAAGGCGTAGACCTTCTGGTTACTCCAAACCAAAAATGTTGGCCT<br>GTATTACAACCCCGCGCAGGACGTCGAAAAGAAAATTTTTCGCTGATACCGCGGATCAAT<br>GATTGGCGTGAGCCATGCGTATAAAAAGGACGGGACTGGCGGGCTGGTCTGCTCGGTTCCGCC<br>GCTGGAAGCGGAGGAGCTTCAAAGACCGATTACGCTTGGGAGAATAATCAGGAACGTTGATT<br>GCGCGAGGTTACCGAATCATACCTGTATGTACGTAGGAATGTTAAGCCAGTATGGTCCGGTAA<br>CTCAGTCTTGGCCCTGAAGGGCGAGATCAAGCAGAGG                                          |
| Ama-Ter   | NIHASTPVLTAANRQWVTHGDLVPGDQVPHPSGKP<br>VDVLAALSDAADDVYVFTNNGEKIRCHANHEWTV<br>YSRADQEKETVETKWFLENTRGTPRSLTAGNRF<br>QFQVPKTNALEGSAGSAGSGERRVSIKVEYVLP<br>NGEKGHCIQVDSPDGLYLVLGKLVATHN          | GCCTCCTCCGAGCGGATGTACCCCGAGGACCATGGTAAAAATATGACATAGCACCCCTGTGCT<br>TGACTCGAACCCTGGTGGGTGACACATGGGATCTAGTTCCTGGAGATCAGGTTTTCATCC<br>GAGCGGCAAAACCGTGGAGCTGCTGGCGCTTCCGGATGAGGCTGTAGATGACTACGCTGTAAT<br>TTTACGAATGGGAAAAAATCAGATGCCATGCTAATCATGAAATGACAGTTTATCCCGCGCGG<br>ATAAACAGGAAAAGACGGTTCGAAACAAAATGGTTCTTGTAGAAATACGAAACCGGAACTCCAG<br>CTCCTTAACCGGGAAATCGTTTTCAGTTTCCAAAGCAAAACGCCCTGGAAGGATCC<br>GCGGGTCTGCGCGCGGTTCTGCGGAGCGCGCGTTCATAGAAAAGTAGAATACTTTCCTTA<br>ACGGGGAAGAAGCCATTGCTAATTCAGGTGGATAGCCAGACCGTCTGTATTTAGTAGGGAAGA<br>ACTTGTGCCACCACAACCCGAGCTGGCCCTGAAGGGCGAGATCAAGCAGAGG                                    |
| BsuP-RIR1 | CVTGETLLLTEGYEKAADLYKKQNNLKVVIDNR<br>TKDFAVDSKGTIIVDAIPMQLTKKDAEIKVVKTK<br>QGYEIRATEWHKFYVVRDGEIQKQLNQLKTGDK<br>LLVQSAEGAGSAGSAGSGDFTAEIISIEEDGVE<br>DVYDTEQEDYHSLIFNGIVTGN                  | GCCTCCTCCGAGCGGATGTACCCCGAGGACAGCAATCTGTGTGACGGGTGAAACCCCTCCTTC<br>TGACCGAAGACGCTATGAAAAGCTGCTGATCTCTATAAGAAGCAGAAATTTAAAAGTGTG<br>CATCGATAATAGGACAAAAGACTTCGCGGTAGATAGTAAAGGACCCTATTGTAGATGCTATT<br>CCAAATGCAATTTAGCAAAAAGATGCCAAATTTTAAAAGTAAAACATAAGCAGGGATGAGAA<br>TTCCGGCTACGGAATGGCATAAGTTTATGTTAAACCGCAGCGTGGATTTGAGAAATTAACCT<br>GAATCAGTCAAGAACAGGATGATAAGCTTCTGGTCCAGATGCGGAGCGCTGCCAGCGAGGT<br>TCCGCGCTGGCTCAGGTGATTTTACGGCGGAGATTATCTCTATTGAAGAAGATGGAGTGGAG<br>ACGTATATGATACAACCTCAAGAGGATTATCATTGCTGATTTTAAAGGCAATGTAACCTGTA<br>TTGACAGTGAAGGGCCCTGAAGGGCGAGATCAAGCAGAGG                                             |
| Cbp-RNR   | CFDQKQKTLTKSHGVNYSFKDLYDTKYKDKER<br>RNFKVFHNGNWVEGKPIRLLRNDKMYKITTVNN<br>KEILVTEHDHINVDKGDYTTQLTENDYIAFNTR<br>PTNAIGSAGSAGSGTMMFKIKTIQYIISNDEYV<br>YCFEMKNIEEYPTLNGIITHN                     | GCCTCCTCCGAGCGGATGTACCCCGAGGACGCTAGCTGTGCTTCGACGGTTCAGCAAAAGCAC<br>TCACAAAATCATCTGAGGTTAACTACCTATCCTTCAAGGATCTACGATACCAAGTATAA<br>AGATAAAGAACCGGCTAATTTTAAAGTTTTTCAAAATGGAATTTGGTCCGAGGAAAGCCTATA<br>AGACTGCTGAGAAATGATAAAAATGTACAAAATACGACTGTGAATAATAAAGAAATCTTAG<br>TTACGGAAGATCATATCAATGTAAACCGGATAAAGGAGATAAATACACCACACAAATTAACCGAAA<br>TGATTAATAGCTTCAATACTAGACCACAAATGCCATCGGCTCGCGGGGTGGCTGCCGCG<br>TCAGGTACCATGTTTTTAAAGTCAAAAACATAACAACAGTATATTTCAATAGTAAATACGTT<br>ATTGTTTTGAAATGAAAACATCGAGGAAACCGTACTTTACCTTACCAATGGTATAAATACGCA<br>CAATTTGCTGCTCGCCCTGAAGGGCGAGATCAAGCAGAGG                                           |

|            |                                                                                                                                                                                                                     |                                                                                                                                                                                                                                                                                                                                                                                                                                                                                                                                                                                                                                                                                                                  |
|------------|---------------------------------------------------------------------------------------------------------------------------------------------------------------------------------------------------------------------|------------------------------------------------------------------------------------------------------------------------------------------------------------------------------------------------------------------------------------------------------------------------------------------------------------------------------------------------------------------------------------------------------------------------------------------------------------------------------------------------------------------------------------------------------------------------------------------------------------------------------------------------------------------------------------------------------------------|
| Ckl-Ter    | ALDLDTPIDPTGWTMRDIECGDYVFGVDGKPT<br>KVIIGTSDIMVNHECYKVT FEDGEFI IADTEHIWT<br>VTTKSRKTLKYKPLKGRQLLRDPDYRESNGYFDV<br>TTGEMAKNFKFRKDGKIEYKYRVPMAGAVEGS<br><b>AGSAGSGS</b> KNKNSVINIEKYKSVPVKCI AVEDEK<br>LYLAGKNHTATHN | <a href="#">GCCTCCTCCGAGCGGATGTACCCCGAGGAC</a> <a href="#">AATGGGAAA</a> GCCTGTGATCTTGACACGCCATAG<br>ACACGCCACCGGGTGGAAAACCATGCGTGACATTGAGTGTGGAGACATGTTTTGGAGTTGA<br>TGTTAAACCAACGAAAGTCATTGGAACCTCGGATATAATGTTAATCATGAATGTTACAAAGTT<br>ACCTTTGAAGATGGAGATTATCATCGCAGATACCGAGATATTTGGACTGTGACACAAAAT<br>CGTCACGAAAACCTTGAATATAAGCCTCTTAAAGGGCGGCAACTTCTGCGTCCAGATTATCG<br>TGAATCAAATGGATATTTTGTATGTAACGACCGGTGAAATGGCCAAAGAAATTTCAAGCATTTTTCCG<br>AAAGACGGAAAAGGATACCGATATAAATACAGAGTACCGATGGCCGGCGAGTTGAGGGTACGG<br>CAGTTCAGCAGCAGGATCAGTAAAAACAATCAGTAATTAACATAGAAAAATACAAATCCGT<br>TCCTGTAAAGTGTATCGCTGGGAAGACAAAAAAATTTGATCCTGGCAGGCAAAAAACACACT<br>GCCACTCACAACTACCTCC <b>GGCCCTGAAGGGCGAGATCAAGCAGAGG</b> |
| Cth-Ter    | QLALDTPIPTDGWTTMGEIKAGDKVIDEKGRPC<br>NVVAISEIDDEQAYKINFRDGTIVAGERHLWK<br>VQVTNNGRREKLLTTGEMYSKQFKTKSKENRALF<br>RIPIDAFI <b>GSAGSAGSGS</b> SHFYIKSIEKTGKT<br>KMRCIQVDSFSRLYLAKGSMIPHTN                               | <a href="#">GCCTCCTCCGAGCGGATGTACCCCGAGGAC</a> <a href="#">AATGGGAAAGC</a> AGCTTGGCTTGATACACCTATCC<br>CTACTCCAGATGGTTGGACAACAATGGGAGAGATCAAAGCCGGGACAAGGTAATCGATGAAAA<br>AGGTCCGCCCTGCAATGTGGTAGCGATCAGCGAAATCGATGATACCGAAACAGGCTTACAAGATT<br>AATTCCTGTAGGTAGTAAGTATAGTCCGTGGAGAACGCCACTGTGGAAAGTCCAGTTACTA<br>ATAATGGCCGGCAGAAAAGTTGCTGACCCTGGTGAATGTACCAAAAAACAGTTTAAACTAA<br>GTCTAAAGAAAACCGTCCCTGTTTGTATACCGATCGCCGACCGCTTATTGAAAGTGGCGGA<br>TCCGCGCCGGAAGCGGATCTCACTCCACTACATAAAGTCTATTGAAATCCGGAACCA<br>AGATGCGGTGTATACAGTGGATAGTCTTCCCTGCTGTATCTCGCCGCAAAATCTATGATACC<br>AACGCACAATTCGGAGTTA <b>GGCCCTGAAGGGCGAGATCAAGCAGAGG</b>                                                                          |
| EP-Pri     | ACPLNEPILLADGTWTTTHGDKVIGDQVASVDGNP<br>STVTGIFPQGVDRDVRVTFEDGRYVDCAGDHLWE<br>VTSRGTKEKRRVIDTFELKRLSETKRHKNGVR<br>IPEITGD <b>GSAGSAGSGS</b> GGCVFVRNVEKIGNAEC<br>LCIMVDHPRHLYVTRGYVATHN                              | <a href="#">GCCTCCTCCGAGCGGATGTACCCCGAGGAC</a> <a href="#">CACGGTAAAGC</a> GTGTCCTTAAATGAACCTATCC<br>TCCTGGCAGATGGACATGGACTACCCATGGTGTGCAAAAACCGGGACCAAGTTGCGAGTGT<br>CGATGGCAACCTTCCACAGTACCGGCATATTTCCGCAAGGCGTCCGTGATGTTTTATCCGCTG<br>ACGTTTGAAGATGGTAGATATGTCGATGTGTCAGGTGATCATCTATGGGAAGTACCTCGAGAG<br>GGTTTACGAAAGCGGAGAAAGCCGCTTATAGACACGTTGCAATAAAAAGGCTGTCCGGAGC<br>CAAGCGTCATAAGAACCGGTGTCGATCCAGAAATCACCAGGATGGTTCGGCGCAGTGCAC<br>GCGGTTCCGGAGGCTGCGGTGTTTTGTTAGAAATGTCGAAAAAATAGGAAACGCAGAAATGTT<br>TATGATATTGCTGTGACCCACCCAGGCATCTTACGTGACGCGCGGATATGTGGCCACCATAA<br>TACCAGGTT <b>GGCCCTGAAGGGCGAGATCAAGCAGAGG</b>                                                                                  |
| LLP-Pol    | CFSGDTEILTPYGVWKFEDYDESMCAQYDEVTVG<br>KISFTYPNETIHLKQDIWVYEDTNTSIHATGNH<br>DILIQPNQDIAKEKFSNLQLLQKDKHREFINAG<br>YVDSAEVDTLMQRL <b>VGSAGSAGSGS</b> FPKAFP<br>TGPSYKGDVYCVNVPHTNIVIRHNDKVISIQGN                       | <a href="#">GCCTCCTCCGAGCGGATGTACCCCGAGGAC</a> <a href="#">GCCAAGGCAT</a> GCTTTTCAGGAGATACCGAAATCT<br>TGACGCCATACGTTGGGTGAAGTTTGAAGATTACGACGAAAGCATGATGTGTCTCAATACGA<br>TGAGGTTACCGGCAAAATAGTTTACCTATCCGAAATGAAACAATACACCTGAAGGATCAGGAC<br>ATCTGGGTGTATGAGGATACAAATACCTCCATTCATGCGACCGGTAACCGATATACTGATTC<br>AGAAACCAACCGGAGATATGCTAAGGAAAAGTTTCTAACTTAACTGTTACAGAAAGGCGA<br>TAAACATAGATTCAATGCGGGATACGTTGATCCGCGCAGAGGATAGACACTCTCATGTCAG<br>CGTGTGTTGGAGCCGGCAGCGCGGACGGTCCGGATCTTCCCTGGGAAGGCATTCCTCA<br>CAGGCCGAGTTATAAAGGGACGCTGATTCGCTCAACGTCCTCCACTATAATATTGTAATTCG<br>TCACAACGATAAGGTGAGCATACAGGCAACT <b>GCAATTTGGCCCTGAAGGGCGAGATCAAG</b><br><b>CAGAGG</b>                                              |
| LP-Hel     | CHAYGHDIMSDGTTKQVQDIAVGDVMDGPDGNP<br>RKVIRLVKQDEMFRVPTPKGESFVNVNGHILSL<br>YQTPRRAGQTPGYTEISVNEYIRSSSTFKHRSKL<br>QRFGFD <b>GSAGSAGSGS</b> QRVDTGFKVEPIGVGDY<br>GFTVDDHLYLDGDFVRHNN                                   | <a href="#">GCCTCCTCCGAGCGGATGTACCCCGAGGAC</a> <a href="#">GCCACTGGGT</a> GCCATGCTTACGGACATGATATAA<br>TGATGTCGATGTTACTAAGAAACAGGTTCCAGGATATTGCAAGTAGGCGACAAGGTTATGGGTCC<br>TGATGGTAATCCTAGAAAAGTCATCCGGCTGGTGAAGGCTCAAGATGAGATGTTTCGTGTACT<br>CCGACGAAAGCGAATCCCTTGTGTTAAACCGTGTGCATCTGTCGCTGTATCAACGGCCAC<br>GGCGCCCGGACAGACTCCGGGATACACCGAGATCTCCGTCATGAATATATAAGGTTCTAGTTC<br>CACTTTTAAAGCAGCTTCAAAATACAGCGCTTTGGCTGATGGGTGTCGGGCGAGTCCCGCT<br>GGGAGTGTCCGCTGACGTTAACGGGGTTAAAGTTGAGCCATTGGCTGGGGGATTTACTATG<br>GCTTTACCGTCGACGGTGTACTTGTACCTTGTATGGGATTTCTGTCAGACATATAATTTGGG<br><b>GAAGGGCCCTGAAGGGCGAGATCAAGCAGAGG</b>                                                                                     |
| MP-B-DnaB  | PLALNTEVPTPSGWTTVGDLSVGDYVLDGQPH<br>RVQRETPVLEGLATYVVRFDGTEITASASHGWT<br>TQRLTGHGDSYETVTVTEELAQTVTNSKGRKRH<br>RIPVVGME <b>GSAGSAGSGS</b> QHRWVESVTPVESVP<br>VKCIGIDTEDHFLQVRSRILTHN                                 | <a href="#">GCCTCCTCCGAGCGGATGTACCCCGAGGAC</a> <a href="#">CAGGATCAGCCAT</a> TGGCACTAAATACTGAGGTTCC<br>CCACCCGAGTGGATGGACAACCGTTGGTGTCTGAGCGTCGGGGATTTATGTTCTCGGCAGTGA<br>CGCCAGCCCCATTCGGGTTCCAGAGGAGACTCCGGTCCCTGAAGGGCTTCTCAGCTATGTTGTA<br>AGGTTTGAAGGACGGGACAGAAATACAGCGAGTGTAGCCACCGCTGGACACCTCAACGTCGTA<br>CGGGCCATGGCATTCTACGAAACCGTAACTGTAACCACCGAAGAGCTGGCTCAGACTGTTAC<br>AAATTTCCAGGGACGTAACCGTGTATCGCATCCCTGTAAGGGTATGGAAAGGTTCCGCGAGGAA<br>GCTGCTGGTGTAGTGGCTCCAGCATCGGTGGGTTGAATCAGTAACACCCGTTGAGAGGCTCCGG<br>TTAAATGCATTTGATTTGATACCGAAGATCATCTTTCCAGGTGAGTCGCGAGCCGAATCTTAAC<br>ACACAACACCAAAAT <b>GGCCCTGAAGGGCGAGATCAAGCAGAGG</b>                                                               |
| MP-K-gp53  | CSWTNARAVTRRGVHVDDLLTTDEVMVSVDQGR<br>TIWQDIDEVVRFPFSGTLYSLGGREINATITANH<br>RVVGLNREKTKWEHTPTSLPGNMWVYTAGEGS<br><b>GSAGSAGSGS</b> LYKNTVEEVAYEVEVWCLRVPNGR<br>FFIEDGGKIHLTGN                                         | <a href="#">GCCTCCTCCGAGCGGATGTACCCCGAGGAC</a> <a href="#">AACCATGATT</a> GCTCATGGACAAACGCACGGGCTG<br>TTACCAGAAGGGGTTTGTACACGTTGACGATCTTACAACGGATGATGAGGTTATGCTGTGTA<br>TGATCAGGGCGCTACGATTTGGCAGCAAAATAGACGAAAGTGGTACGCTTCCATTTAGCCGAAC<br>TTATATTACTGGTGGCGAGAGAAATTAACGCCACAATAACTGCCAATCACCGCTGGTCCGAG<br>TTAATCGGAAAAAATAAATGGTGGAAACATACCAACGTCACTGCCGGCAATAAGATGTG<br>GGTGTACACAGCTGGGGAAGGGAGTGGAAAGCCCGCTCGCGCCGGTTCAGGCTTATAACAAG<br>AAATCTGTGGGAAGATTGATACAGAAAGCGAAGTTGGTCCCTGAGAGTCCCTAACGGTCTGTT<br>TTTTCATTAAGACCGTGGCAAGATTACCTTAACCGAAAT <b>TACGGGCGGCCCTGAAGGG</b><br><b>CGAGATCAAGCAGAGG</b>                                                                                                  |
| MP-C-gp206 | SLACSTPIILTTNGWSTMALQDGEVYAPDQPT<br>KVIKAHPINLNRPCFKVFRFDGQEVVTDAEHLWQ<br>VNDNRNNGRDRVMTTQBIADAPWNGRFRVFPVT<br>EPLQ <b>GSAGSAGSGS</b> LRNLNAIVAVEPVETVPRCI<br>TVAHESLSLYVAGEGFVPTHN                                 | <a href="#">GCCTCCTCCGAGCGGATGTACCCCGAGGAC</a> <a href="#">GAGCTGAAG</a> AGCCTAGCATGTTCCACACCTATTT<br>TGACGACAAACCGGCTGGTCCACTATGGGGCTTTGCGAGATGGTACGAAGTCTACCGCCAGA<br>CGGACAGCAACAAAAGTTATAAAGGCCACCCGATCAACCTGAATAGACTGCTCTTAAAGTG<br>CGGTTCTGTCAGCCTCAGGAAGTGGTTACCGATGCGGACGACCTTTGGCAGGTTAAACGATCGCA<br>ATAATGGTGGCCGATCGTGTGTTAGAACACTCAGGAGATCGCAGATCTCCCTTGGGGAGGCGG<br>ATATCGATTCCGTTTCCGGTGTACTGAGCCATTACAGGGGCTCGCGGCTCGGCTGCTGGCTCG<br>GGACTCGGTTTAAACGCCATTTGTTGACGATGAAACCGGTGGAAACCGTCCCGGTCGGTGCATCA<br>CCGTTGCTCATGAATCATCTTTATATGTTGACGTTGAAGATTGTTGACCGACTATAACACACA<br><b>AAATGGCCCTGAAGGGCGAGATCAAGCAGAGG</b>                                                                              |
| MP-M-DnaB  | ALDVEPTIILTNGWKKMGDIQVGDYVHAADGTLA<br>RVSYVSRHWRDQFSVQFADGAEVLVADHHLWAV<br>NDRKLGKERVLDIAELYRTQTYGARGDRRYTVTV<br>EALD <b>GSAGSAGSGS</b> GARTNTITTSVTPVPTVETVCI<br>QIDHPSHVFLAGKSLPTHTN                              | <a href="#">GCCTCCTCCGAGCGGATGTACCCCGAGGAC</a> <a href="#">AACGGGAAA</a> GCCTGTGATGTTGAAACACCAATCC<br>TCACTGGCAACGTTGGAAAAAGATGGGCGACATACAGTCCGGGACTACGTGACCGCCGCTGA<br>TGGCACACTCGCCCGCGTGAAGTATGCTCCGAACGTCCTGGCGTATTGTTTTAGTGTGACG<br>TTTCCGATGGGGCAGAAATGGTTCATACAGACCATCACTTGTGGGCGGTTAACGATCGTCTCA<br>AAGGGAGCGGCTTATTGACACAGCCGAACTGTACCACCCAAACGTCAGGGGCCCGCGGCGA<br>TCGTCGTTACACTGTTACCGTGCAGAAAGCTTTGGATGGCAGTCCGGGTCAGCGGACGAGCAGT<br>GGGGCGCAACGAAATCAATACCTCTGTGACCGCTGTCCTACCGTAGAGACGATGATGATAC<br>AGATTGATCATCCGTGCAATGTTCTGCTGGTAAAAGTCTGACCCCAACTCACACACAGA<br><b>ATTGGCCCTGAAGGGCGAGATCAAGCAGAGG</b>                                                                                          |



|          |                                                                                                                                                                                                                         |                                                                                                                                                                                                                                                                                                                                                                                                                                                                                                                                                                                                                                                                                                        |
|----------|-------------------------------------------------------------------------------------------------------------------------------------------------------------------------------------------------------------------------|--------------------------------------------------------------------------------------------------------------------------------------------------------------------------------------------------------------------------------------------------------------------------------------------------------------------------------------------------------------------------------------------------------------------------------------------------------------------------------------------------------------------------------------------------------------------------------------------------------------------------------------------------------------------------------------------------------|
| PP-Phi   | <p>AGVLSKIKIPGGWKTGMNIRVGEVVTDPGGTA<br/>KVLAVHPQGVTKVVRVHFVFDGRYTDVSPDHLWKV<br/>RRHHWCNDKAMAKLTREEVEERVVRIITNELKD<br/>YIGLSKVYVQLIEPER<b>GSAGSAAGSG</b>TLRLQVT<br/>HIEERPDEETQCITIDHPDHLIITDDFIVTHN</p>                 | <p><u>GCCTCCTCCGAGCGGATGTACCCCGAGGAC</u>GCAGGCAAGGCAGGAGTGCCTGTCGCGAAAAATAA<br/>AAATCCCTGGGGGGTGGAAAACGATGGCAATATCCCGCTTGGCGATGAAGTAGTACACCCGGA<br/>CGCGGCACAGCGAAGGTGTAGCCGCTTATCCGCAAGGCGTAACCAAAGTTGTCGCTGTGCAT<br/>TTCAAAGATGGCCGCTATACCTGATGCTCCTCCCGATCACCTCGGAAAGTGAGGCGTCAATCCT<br/>GGTGAATGATAAAGCGATGGCGAACTGACTCGGGAAGAGGTTGAGGAGCGTGTGTGGAGAGT<br/>GATAACTACGAATGAGCTGAAAGATTATATGGACTTTCCACAAAAGTTTATGTTCAACTGATA<br/>GAGCCGGAACGTGGCTCGGCGGGCTCAGCGCGGGCTCAGGTACACTCCGCTTCAAGTTACAC<br/>ATATTGAGGAGCTCCAGACGAAGAGACACAGTGCATTACCATCGACCATCCGGATCATTTTGT<br/>TATTACTGATGATTCATCGTTACGCACAACCTCCCTTACT<u>GGCGCCCTGAAGGGCGAGATCAAG</u><br/><u>CAGAGG</u></p>                                |
| SaP-dpol | <p>CLHRHTQVLTGGFKDIMAVTSTDKVWSGEKWN<br/>TKGAHLMGWKPVINVDGLMTEDEHKILTHSWKQA<br/>KQLVSNKYMMDRALIEGMDAWLSCASYQNDKAKD<br/>NYSSNVIVERCLG<b>GSAGSAAGSG</b>NLNGKLTyceP<br/>VYDLIDVEDGNRFLIASDSGFLVAHN</p>                      | <p><u>GCCTCCTCCGAGCGGATGTACCCCGAGGAC</u>GGAAAGCCCTGCCTGCATCGACACACTCAGGTTT<br/>TTACTGATGGCGGATTTAAAGATATCATGGCCGTTACCAGTACTGATAAAGTCTGGAGCGGCGA<br/>AAAATGGGTTAAACTAAGGGGGCACATCTGATGGGGTGGAAACCGGTTATTAATGTCGATGGT<br/>GTTCCTATGACCGAAGATCACAAAATTTCTACCCACAGCTGGAAACAGGCAAGCAGCTGGTTT<br/>CTAACAAAATATATGATGGATCGTGCTCTCGAAAATAGGCATGGATGCATGGCTCTCTGTGCGAG<br/>TTATCAAAATGATAAAGCCAAGGACAAATACAGTAGTAACGTTATTTGGAACGGTGCCTGGCG<br/>GGCAGTGGCGGGTCTGCTGGCGGGCTCAGGCAATCTGAACGGCAAACTGAGCTACTGTGAACAG<br/>TTTATGATCTAATAGATGTGGAGGACGTAACCGATTCTAATTTGCGTGCAGATCCCGTTTTTT<br/>AGTGGCTCATAACTCGCAACTG<u>GGCGCCCTGAAGGGCGAGATCAAGCAGAGG</u></p>                                                         |
| SaP-Hel  | <p>CLKRGTVEIMFDGTTKKVEDVIVGDVLMGPDSTP<br/>RNVLSLGRGEMMYEYKPRKGESYTVNESHILSL<br/>RTTGTIAGKSWPDNTVFDISVRDWLKLPKYVTGP<br/>NGYLKGRVFPVDFP<b>GSAGSAAGSG</b>VLNVGIESI<br/>TPVGVDDYFGETIDGDSRFLLDGFTVTHN</p>                   | <p><u>GCCTCCTCCGAGCGGATGTACCCCGAGGAC</u>AGCGGCAAGTGCCTGAAACCGGAAACCGAAGTAA<br/>TCATGTTTGTGATGACTACTAAGAAAGTAGAAGACGTGATGTTGGAGATGTGCTTATGGGCC<br/>AGACTTACCCCGAGAAACGTCCTGTCCTGGGGCGAGGGCGTGAATGATGATGAAGTTAAA<br/>CCGGGAAAGGGGAGAGTTATACAGTTAATGAAAGTCATATCCTGTCCCTGCGAACGACCACTG<br/>GAATCGCTAAAGTTCTCGCCGGATAATACAGTCTTCGACATCAGTGTGCGTATTGGCTGAA<br/>ACTGCGGAAATATGTAACCTGGTCTAACGGTTATCTGAAGGGTGGCGCGTGCCTGTAGACTTC<br/>CCTCGGGGTCTCGCCGTTCTGCGCGTGGCTCCGGAGTTTAAATGTGGGGATTGAATCCATTA<br/>CGCCAGTCCGAGTGGATGATTTTTCGGCTTTACCATCGATGGCGATTCTCGGTTCTTATTGGG<br/>TGATTTTACAGTTACCATAACACAGGTTCT<u>GGCGCCCTGAAGGGCGAGATCAAGCAGAGG</u></p>                                                            |
| NrdA-2   | <p>CLTGDAKIDVLIDNIPISQISLEEVNLFNEGKE<br/>IYVLSYNIIDTKEVEYKEISDAGLISESAEVLII<br/>DEETGQKIVCTPDHKVYTLNRGYVSAKDLKEDDE<br/>LVF<b>GSAGSAAGSG</b>GLKIKRESKEPVFDITVKD<br/>NSNFFANNILVHN</p>                                    | <p><u>GCCTCCTCCGAGCGGATGTACCCCGAGGAC</u>TCAAACCTTTGTCTCACGGCGATGCTAAAATCG<br/>ACGTACTTATCGATAATATTCCTATCTCCAGATATCCCTGGAGGAAGTTGTTAACTGTTTAA<br/>TGAAGCAAGAGATATATGTTTGTCTTATAATTTGATACCAAGGAGGTTGAATATAAGAA<br/>ATTTCTGACGCAGGTCATCAGTGAATCTGCCGAAGTGCCTGGAAATCATGACGAAGAACTG<br/>GGCAGAAAATGTTTGTACCCCTGATCATAAAGTGTATACCTGACCCGGGGTACGTTTCTGC<br/>TAAGGATCTCAAAGAAGACGATGAGCTGGTGTATTGAGGGATCAGCCGGCAGCGAGTGGCTCG<br/>GGCGGTTAAAAATATAAACCTGATCAAAAGAAACAGTGTATTGACATTAATGATCAAGATA<br/>ATAGCAATTTTTTTCGAATAATATCTTGGTGCATAACTGCAATGAG<u>GGCGCCCTGAAGGGCGA</u><br/><u>GATCAAGCAGAGG</u></p>                                                                                                         |
| Pfu-RIR1 | <p>CIDGKAKIIFENEGEEHLTMEEMYERYKHLGEF<br/>YDEEYNRWIDVSNVPIYVKSFDPEKRVVKGKV<br/>NVIWKYELGKDVTKYEIITNKGTKILTSPPHPPF<br/>VLTPDFKIVEKRADELKEGDIL<b>GSAGSAAGSGL</b><br/>HLEGLEVVRRHITTTNEPRTFYDLTVENYQNYLA<br/>GENGMIFVHN</p> | <p><u>GCCTCCTCCGAGCGGATGTACCCCGAGGAC</u>GGGGCGGCTGCATTGATGGTAAAGCGAAAATCA<br/>TCTTCGAAAACGAGGTTGAAGAACCTGACCCTATGGAAGAAATGTACGAACTTATAAGCA<br/>CCTGGGAGAAATTTACGATGAGGAATATAATAGTGGGGAATCGACGATATCCAAATGTGCCATT<br/>TATGTAAGAGATTTCGATCCGAAATCAAAGCGAGTTGTCAAAGGTAAGGTTAATGTAATTTGGA<br/>AATATGAACCTTGGTAAAGACGTTACGAAAATACGAGATTATTACTAACAAAGGTACAAAATCT<br/>TACTTCGCGGTGGCATCCTTTTTTGTCTTACCCCGAGCTCAAATTTGTAAGAAAACCGCGG<br/>GATGAATATAAGAGGGCGATATCTCATCGGATCAGCGGGATCCGCTGCTGGATCTGGCCCTC<br/>ACTTGATCGAAGCTTGGAGGTGGTATAGCATATCACCCACCACCAAGCAGCCGAGAATTTTA<br/>TGATTTGACCGTTGAGAATATCAGAAATATCTGGCGGGTGAATGGGATGATCTTCGTTTCAT<br/>AATACAGGCTTA<u>GGCGCCCTGAAGGGCGAGATCAAGCAGAGG</u></p>         |
| Mja-KIbA | <p>ALAYDEPIYLSGNIINIGEFVDFKFFKYYKNSIK<br/>KEDNFGWIDIGNENIYIKSFNLSLIIEDKRIL<br/>RVWRKKYSGKLIKITTKNRREITLTHDPVYISK<br/>TGEVLEINAEMVKVDYIYIPKNN<b>GSAGSAAGS</b><br/>GINLDEVIKVETVDYNGHIYDLTVEDNHTYIAGK<br/>NEGFAVSN</p>    | <p><u>GCCTCCTCCGAGCGGATGTACCCCGAGGAC</u>CACGATGGAGCGCTGGCCTATGACGAACCCATCT<br/>ATCTGTCGGATGGCAACATATAAATATTGGTGAATTTGTTGATAAATTTTTCAAAGGTACAA<br/>AAACTCTATCAAAAAGGAAGATAACGGTTTTGGATGGATTGACATTGGCAATGAAAACATTTAC<br/>ATTAAGTCGTTCAATAAGCTTAGTCTTATCATCGAAGATAAGCGCATCTCGCGGTTTTGGCGAA<br/>AAAAACTACTCAGGTAATTAATTAAGATCACCCAAAAATCGCCGCGAGATTACACTAACACA<br/>CGACCCCTGTTTTATATCTCAAAAACCGGTGAGGTGCTGGAAATTAATGCCGAAATGGTTAAA<br/>GTCGGTGATTACATTTACATCCGAAAAATAACACGGGATCAGCCGGTTCAGCGGCGGTTTCGG<br/>GAATTAACCTGGATGAAGTAATCAAAGTTGAAACAGTGGACTATAATGGCCACATTTATGATTT<br/>AACCGTCGAGGATAATCACACCTACATCGCAGGTAAGAACGAGGGCTTCGCTGTTTCAAAT<u>TC</u><br/><u>TCGGGTGGCGCCCTGAAGGGCGAGATCAAGCAGAGG</u></p> |

<sup>a</sup> The flexible linker sequence is in bold.

<sup>b</sup> Sequences homologous to mCherry are in pink and sequences encoding the junctions sequence residues are underlined.

**Supplementary Table 4 | Sequences for the N- and C-termini of the split inteins**

| Intein  | Split site | Terminal | Sequence <sup>a</sup>                                                                                                                                |
|---------|------------|----------|------------------------------------------------------------------------------------------------------------------------------------------------------|
| M86     | S1         | N1       | CISGDSLISLAST                                                                                                                                        |
|         |            | C1       | GKRVPIKDLLGEKDFEIWAIN EQTMKLES AKVSRVFC TGGKLVYTLKTRLGRTIKATANHRFLTIDGWKRLDELSLKEHIALPRKLESSSLQLAPEIEKLPQSDIYWDPIV SITETGV EEFVFDLTV PGLRNFVANDIIVHN |
|         | S2         | N2       | CISGDSLISLASTGKRVPIKDLLGEKDFEIWAIN EQTMKLES AKVSRVFC TGGKLVYTLKTRLGRTIKATANHRFLTIDGWKRLDELSLKEHIALPRKLE                                              |
|         |            | C2       | SSSLQLAPEIEKLPQSDIYWDPIV SITETGV EEFVFDLTV PGLRNFVANDIIVHN                                                                                           |
|         | S3         | N3       | CISGDSLISLASTGKRVPIKDLLGEKDFEIWAIN EQTMKLES AKVSRVFC TGGKLVYTLKTRLGRTIKATANHRFLTIDGWKRLDELSLKEHIALPRKLESSSLQLAPEIEKLPQSDIYWDPIV SITETGV EEFVFDLTVPG  |
|         |            | C3       | LRNFVANDIIVHN                                                                                                                                        |
| NpuSsp  | S1*        | N1       | CLSYETEILTVEY                                                                                                                                        |
|         |            | C1       | GSLPIGKIVEKRIE CTVYSVDNNGNIYTPVAQWHD RGEQEVFEYCLE DGS LIRATKDKHKFMTVDGQMLPIDEIFERELDLMRVDNLPNGSAGSAAGSGVKVIGRRSLGVQRIFDIGLRQDHNFLLANGAIAAN           |
|         | S2         | N2       | CLSYETEILTVEYGS LPIGKIVEKRIE CTVYSVDNNGNIYTPVAQWHD RGEQEVFEYCLE DGS LIRATKDKHKFMTVDGQMLPIDEIFERELDLMRVDNLPN                                          |
|         |            | C2       | MVKVIGRRSLGVQRIFDIGLRQDHNFLLANGAIAAN                                                                                                                 |
|         | S3*        | N3       | CLSYETEILTVEYGS LPIGKIVEKRIE CTVYSVDNNGNIYTPVAQWHD RGEQEVFEYCLE DGS LIRATKDKHKFMTVDGQMLPIDEIFERELDLMRVDNLPNGSAGSAAGSGVKVIGRRSLGVQRIFDIGLRQ           |
|         |            | C3       | DHNFLLANGAIAAN                                                                                                                                       |
| gp41-1  | S1         | N1       | CLDLKTQVQTPQ                                                                                                                                         |
|         |            | C1       | GMKEISNIQVGD LVLNNTGYNEVLNVFPKSKKSKYKITLEDGKEIICSEEHLPFTQTGEMNISGGLKEGMCLYVKEMMLKKILKIEELDERELIDIEVSGNHLFYANDILTHN                                   |
|         | S2         | N2       | CLDLKTQVQTPQGMKEISNIQVGD LVLNNTGYNEVLNVFPKSKKSKYKITLEDGKEIICSEEHLPFTQTGEMNISGGLKEGMCLYVKE                                                            |
|         |            | C2       | LKKILKIEELDERELIDIEVSGNHLFYANDILTHN                                                                                                                  |
|         | S3         | N3       | CLDLKTQVQTPQGMKEISNIQVGD LVLNNTGYNEVLNVFPKSKKSKYKITLEDGKEIICSEEHLPFTQTGEMNISGGLKEGMCLYVKEMMLKKILKIEELDERELIDIEVSG                                    |
|         |            | C3       | NHLFYANDILTHN                                                                                                                                        |
| gp41-8  | S1         | N1       | CLS LDTMVVTN                                                                                                                                         |
|         |            | C1       | GKAIEIRDVKVGDWLESECGPVQVTEVLP I IKQPVFEI VLKSGKKIRVSANHKFP TKDGLKTINSGLKVGDFLRSRAKCEIFENEIDWDEIASIEYVGVEETIDINVTNDRLFFANGILTHN                       |
|         | S2         | N2       | CLS LDTMVVTNGKAIEIRDVKVGDWLESECGPVQVTEVLP I IKQPVFEI VLKSGKKIRVSANHKFP TKDGLKTINSGLKVGDFLRSRAK                                                       |
|         |            | C2       | MCEIFENEIDWDEIASIEYVGVEETIDINVTNDRLFFANGILTHN                                                                                                        |
|         | S3         | N3       | CLS LDTMVVTNGKAIEIRDVKVGDWLESECGPVQVTEVLP I IKQPVFEI VLKSGKKIRVSANHKFP TKDGLKTINSGLKVGDFLRSRAKCEIFENEIDWDEIASIEYVGVEETIDINVTN                        |
|         |            | C3       | DRLFFANGILTHN                                                                                                                                        |
| NrdJ-1  | S1         | N1       | CLVGSSEIITRNY                                                                                                                                        |
|         |            | C1       | GKTTIKEVVEIFDNDKNIQV LAFNHTDNIEWAPIKAAQLTRPNAELVELEIDTLHGVTIRCTPDHPVYTKNRYVRADELTDDELVAIMEAKTYIGKLSRKIVSNEDTYDIQTSTHNFANDILVHN                       |
|         | S2         | N2       | CLVGSSEIITRNYGKTTIKEVVEIFDNDKNIQV LAFNHTDNIEWAPIKAAQLTRPNAELVELEIDTLHGVTIRCTPDHPVYTKNRYVRADELTDDELVAI                                                |
|         |            | C2       | MEAKTYIGKLSRKIVSNEDTYDIQTSTHNFANDILVHN                                                                                                               |
|         | S3         | N3       | CLVGSSEIITRNYGKTTIKEVVEIFDNDKNIQV LAFNHTDNIEWAPIKAAQLTRPNAELVELEIDTLHGVTIRCTPDHPVYTKNRYVRADELTDDELVAIMEAKTYIGKLSRKIVSNEDTYDIQTS                      |
|         |            | C3       | THNFANDILVHN                                                                                                                                         |
| IMPDH-1 | S1         | N1       | CFVPGTLVNTEN                                                                                                                                         |
|         |            | C1       | GLKKIEEIKVGDVFSHTGKLQEVVDTLIFDRDEEII SINGIDCTKNHEFYVIDKENANRVNEDNIHLFARWVHAEELD MKKHLLIELEMKFKLKEITSIETKHYKGVHDLTVNQDHSYNVRGTVVHN                    |
|         | S2         | N2       | CFVPGTLVNTENGLKKIEEIKVGDVFSHTGKLQEVVDTLIFDRDEEII SINGIDCTKNHEFYVIDKENANRVNEDNIHLFARWVHAEELDMKKHLLIELE                                                |
|         |            | C2       | MKFKLKEITSIETKHYKGVHDLTVNQDHSYNVRGTVVHN                                                                                                              |
|         | S3         | N3       | CFVPGTLVNTENGLKKIEEIKVGDVFSHTGKLQEVVDTLIFDRDEEII SINGIDCTKNHEFYVIDKENANRVNEDNIHLFARWVHAEELDMKKHLLIELEMKFKLKEITSIETKHYKGVHDLTVNQ                      |
|         |            | C3       | DHSYNVRGTVVHN                                                                                                                                        |
| SspDnaX | S1         | N1       | CLTGDSQVLTRN                                                                                                                                         |
|         |            | C1       | GLMSIDNPQIKGREVLSYNETLQOQWEYKVKVLRWLD RGEKQTL SIKTKNSTVRCTANHLIRTEQGWT RAENITPGMKILS PAPQWHTNFEEVESVTKGQVEKVYDLEVEDNHN FVANGLLVHN                    |
|         | S2         | N2       | CLTGDSQVLTRNGLMSIDNPQIKGREVLSYNETLQOQWEYKVKVLRWLD RGEKQTL SIKTKNSTVRCTANHLIRTEQGWT RAENITPGMKILSPA                                                   |
|         |            | C2       | PQWHTNFEEVESVTKGQVEKVYDLEVEDNHN FVANGLLVHN                                                                                                           |
|         | S3         | N3       | CLTGDSQVLTRNGLMSIDNPQIKGREVLSYNETLQOQWEYKVKVLRWLD RGEKQTL SIKTKNSTVRCTANHLIRTEQGWT RAENITPGMKILSPA PQWHTNFEEVESVTKGQVEKVYDLEVED                      |
|         |            | C3       | NHN FVANGLLVHN                                                                                                                                       |

|         |     |    |                                                                                                                                                                                    |
|---------|-----|----|------------------------------------------------------------------------------------------------------------------------------------------------------------------------------------|
| SspGyrB | S1  | N1 | CFSGDTLVALTD                                                                                                                                                                       |
|         |     | C1 | GRSVSFEQLVEEEKQKQNFYCTIRHDGSIGVEKIINARKTKTNAKVIKVTLDNGESIICTPDHKFMLRDGSYKCAMDLTDDSLMPLHRKISTTEDSGHAMEAVLNYNHRIVNIEAVSETIDVYDIEVPHTHNFALASGVFVHN                                    |
|         | S2  | N2 | CFSGDTLVALTDGRSVSFEQLVEEEKQKQNFYCTIRHDGSIGVEKIINARKTKTNAKVIKVTLDNGESIICTPDHKFMLRDGSYKCAMDLTDDSLMPLHRKISTTEDSGHA                                                                    |
|         |     | C2 | MEAVLNYNHRIVNIEAVSETIDVYDIEVPHTHNFALASGVFVHN                                                                                                                                       |
|         | S3  | N3 | CFSGDTLVALTDGRSVSFEQLVEEEKQKQNFYCTIRHDGSIGVEKIINARKTKTNAKVIKVTLDNGESIICTPDHKFMLRDGSYKCAMDLTDDSLMPLHRKISTTEDSGHAMEAVLNYNHRIVNIEAVSETIDVYDIEVPH                                      |
|         |     | C3 | THNFALASGVFVHN                                                                                                                                                                     |
| TerThyX | S1* | N1 | CLSGNTKVRFRYS                                                                                                                                                                      |
|         |     | C1 | SSSQEAKYYEETIEKLANLWHYGSKNQYTSKDAKMQENISSRNIFTLDTQTNQIVSSKITNIYINGEKETYTIKTVSGKEIRATLEHQFWTNQGWKRLKDFNNSTQLCEVQLAGSAGSAAGSGGVFVEIESIEKFGKEITYDLEVEHPEHNFIANGLVHN                   |
|         | S2  | N2 | CLSGNTKVRFRYSSSQEAKYYEETIEKLANLWHYGSKNQYTSKDAKMQENISSRNIFTLDTQTNQIVSSKITNIYINGEKETYTIKTVSGKEIRATLEHQFWTNQGWKRLKDFNNSTQLCEVQLA                                                      |
|         |     | C2 | GVFVEIESIEKFGKEITYDLEVEHPEHNFIANGLVHN                                                                                                                                              |
|         | S3* | N3 | CLSGNTKVRFRYSSSQEAKYYEETIEKLANLWHYGSKNQYTSKDAKMQENISSRNIFTLDTQTNQIVSSKITNIYINGEKETYTIKTVSGKEIRATLEHQFWTNQGWKRLKDFNNSTQLCEVQLAGSAGSAAGSGGVFVEIESIEKFGKEITYDLEVEH                    |
|         |     | C3 | PEHNFIANGLVHN                                                                                                                                                                      |
| TvoVMA  | S1  | N1 | CVSGETPVYLAD                                                                                                                                                                       |
|         |     | C1 | GKTIKIDLYSSERKKEDNIVEAGSGEEIIHLKDP IQIYSYVDGTIVRSRRLLYK GKSSYLVR IETIGGRSVSVTPVHKLFVLT EKGIEEVMASNLKVGDMIAAAVAESESEARDCGMSEECVMEAEVYTSLEATFDRVKS IAYEKGDFDVYDLSVPEYGRNFIGGEGLLVLHN |
|         | S2  | N2 | CVSGETPVYLADGKTIKIDLYSSERKKEDNIVEAGSGEEIIHLKDP IQIYSYVDGTIVRSRRLLYK GKSSYLVR IETIGGRSVSVTPVHKLFVLT EKGIEEVMASNLKVGDMIAAAVAESESEARDCGMSEECV                                         |
|         |     | C2 | MEAEVYTSLEATFDRVKS IAYEKGDFDVYDLSVPEYGRNFIGGEGLLVLHN                                                                                                                               |
|         | S3  | N3 | CVSGETPVYLADGKTIKIDLYSSERKKEDNIVEAGSGEEIIHLKDP IQIYSYVDGTIVRSRRLLYK GKSSYLVR IETIGGRSVSVTPVHKLFVLT EKGIEEVMASNLKVGDMIAAAVAESESEARDCGMSEECVMEAEVYTSLEATFDRVKS IAYEKGDFDVYDLSVPE     |
|         |     | C3 | YGRNFIGGEGLLVLHN                                                                                                                                                                   |
| PhoRadA | S1  | N1 | CFARDTEVYYEND                                                                                                                                                                      |
|         |     | C1 | TVPHMESIEEMYSKYASMNGLPFDNGYAVPLDNV FVYTLDIASGEIKKTRASYIYREKVEKLEIEIKLSSGYS LKVT PSHPVLLFRDGLQWVPAAEVKPGDVVGVREEVLRRI ISKGELEFHEVSVR I IDYNNWVYDLVI PETHNFIAPNGLVLHN                |
|         | S2  | N2 | CFARDTEVYYENDTVPHMESIEEMYSKYASMNGLPFDNGYAVPLDNV FVYTLDIASGEIKKTRASYIYREKVEKLEIEIKLSSGYS LKVT PSHPVLLFRDGLQWVPAAEVKPGDVVGVREEVLR                                                    |
|         |     | C2 | RIISKGELEFHEVSVR I IDYNNWVYDLVI PETHNFIAPNGLVLHN                                                                                                                                   |
|         | S3  | N3 | CFARDTEVYYENDTVPHMESIEEMYSKYASMNGLPFDNGYAVPLDNV FVYTLDIASGEIKKTRASYIYREKVEKLEIEIKLSSGYS LKVT PSHPVLLFRDGLQWVPAAEVKPGDVVGVREEVLRRI ISKGELEFHEVSVR I IDYNNWVYDLVIPE                  |
|         |     | C3 | THNFIAPNGLVLHN                                                                                                                                                                     |
| Ama-Ter | S1* | N1 | NIAHSTPVL TANR                                                                                                                                                                     |
|         |     | C1 | GWVTHGDLVPGDQVFHPSGK PVDVLALSDEAVDDYVVTFTNGEKIRCHANHEWTVYSRADKQEKTVETKWFLENTNRGTPRSLTAGNRFQVQPKTNALEGSAGSAAGSGERRVSI EKVEYLPNGEKGHCIQVDS PDGLYL VGK KLVATHN                        |
|         | S2  | N2 | NIAHSTPVL TANR GWVTHGDLVPGDQVFHPSGK PVDVLALSDEAVDDYVVTFTNGEKIRCHANHEWTVYSRADKQEKTVETKWFLENTNRGTPRSLTAGNRFQVQPKTNALE                                                                |
|         |     | C2 | ERRVSI EKVEYLPNGEKGHCIQVDS PDGLYL VGK KLVATHN                                                                                                                                      |
|         | S3* | N3 | NIAHSTPVL TANR GWVTHGDLVPGDQVFHPSGK PVDVLALSDEAVDDYVVTFTNGEKIRCHANHEWTVYSRADKQEKTVETKWFLENTNRGTPRSLTAGNRFQVQPKTNALEGSAGSAAGSGERRVSI EKVEYLPNGEKGHCIQVD                             |
|         |     | C3 | SPDGLYL VGK KLVATHN                                                                                                                                                                |
| Cth-Ter | S1* | N1 | QLALDTP IPTPD                                                                                                                                                                      |
|         |     | C1 | GWTTMGEIKAGDKVIDEKGRPCNVVAISEIDDT E QAYKINFRDGT SIVAGERHLWKVQVTNNGREKLLTTGEM YQKQFKTKSKENRALFR IPIADAF IGSAGSAAGSGSHFHYIKSIEKTGKTKMRCIQVDS PSRLYL AGKSM IPTHN                      |
|         | S2  | N2 | QLALDTP IPTPDGWTTMGEIKAGDKVIDEKGRPCNVVAISEIDDT E QAYKINFRDGT SIVAGERHLWKVQVTNNGREKLLTTGEM YQKQFKTKSKENRALFR IPIADAF I                                                              |
|         |     | C2 | SHFHYIKSIEKTGKTKMRCIQVDS PSRLYL AGKSM IPTHN                                                                                                                                        |
|         | S3* | N3 | QLALDTP IPTPDGWTTMGEIKAGDKVIDEKGRPCNVVAISEIDDT E QAYKINFRDGT SIVAGERHLWKVQVTNNGREKLLTTGEM YQKQFKTKSKENRALFR IPIADAF IGSAGSAAGSGSHFHYIKSIEKTGKTKMRCIQVD                             |
|         |     | C3 | SPSRLYL AGKSM IPTHN                                                                                                                                                                |
| LLP-Pol | S1* | N1 | CFSGDTEILTPY                                                                                                                                                                       |
|         |     | C1 | GWVKFEDYDESMMAQYDEVTKGISFTYPNETIHLKDQDIWVYEDTNTSIHATGNHDILIQKPNGDI AKEKFSNLQLLQKGDKHRFINAGYVDSAEVDTLMQRLVGSAGSAAGSGSFPGKAFPTGPSYKGDVYCVNVPTHNIVIRHNDKVISIQGN                       |
|         | S2  | N2 | CFSGDTEILTPYGWVKFEDYDESMMAQYDEVTKGISFTYPNETIHLKDQDIWVYEDTNTSIHATGNHDILIQKPNGDI AKEKFSNLQLLQKGDKHRFINAGYVDSAEVDTLMQRLV                                                              |
|         |     | C2 | SFPGKAFPTGPSYKGDVYCVNVPTHNIVIRHNDKVISIQGN                                                                                                                                          |
|         | S3* | N3 | CFSGDTEILTPYGWVKFEDYDESMMAQYDEVTKGISFTYPNETIHLKDQDIWVYEDTNTSIHATGNHDILIQKPNGDI AKEKFSNLQLLQKGDKHRFINAGYVDSAEVDTLMQRLVGSAGSAAGSGSFPGKAFPTGPSYKGDVYCVNVPTHNIVIRHNDKVISIQGN           |
|         |     | C3 | THNIVIRHNDKVISIQGN                                                                                                                                                                 |

|           |     |    |                                                                                                                                                                                |
|-----------|-----|----|--------------------------------------------------------------------------------------------------------------------------------------------------------------------------------|
| LP-Hel    | S1* | N1 | CHAYGHDIMMSD                                                                                                                                                                   |
|           |     | C1 | GTKKQVQDIAVGDKVMGPDGNPRKVIRLVKGQDEMFRVPTPKGESFVNVGGHILSLYQTPRRAGQTPGYTEISVNEYIRSSSTFKHRSKLRQRF <b>GSAGSAAGSG</b> RVDVTGFKVEPIGVGDYIGFTVDGDHLYLDGDFVRHHN                        |
|           | S2  | N2 | CHAYGHDIMMSDGTKKQVQDIAVGDKVMGPDGNPRKVIRLVKGQDEMFRVPTPKGESFVNVGGHILSLYQTPRRAGQTPGYTEISVNEYIRSSSTFKHRSKLRQRF <b>GSAGSAAGSG</b> RVDVTGFKVEPIGVGDYIGFTVDGDHLYLDGDFVRHHN            |
|           |     | C2 | RVDVTGFKVEPIGVGDYIGFTVDGDHLYLDGDFVRHHN                                                                                                                                         |
|           | S3* | N3 | CHAYGHDIMMSDGTKKQVQDIAVGDKVMGPDGNPRKVIRLVKGQDEMFRVPTPKGESFVNVGGHILSLYQTPRRAGQTPGYTEISVNEYIRSSSTFKHRSKLRQRF <b>GSAGSAAGSG</b> RVDVTGFKVEPIGVGDYIGFTVDG                          |
|           |     | C3 | DHLYLDGDFVRHHN                                                                                                                                                                 |
| MP-B-DnaB | S1* | N1 | PLALNTEVPTPS                                                                                                                                                                   |
|           |     | C1 | GWTTVGDLSVGDYVLGSDGQPHRVQRETPVLEGLATYVVRFDGTEITASASHGWTQRLTGHGDSYETVTVTTEELAQTVTNSKGRKRHRIPVVGME <b>GSAGSAAGSG</b> SQHRWVESVTPVESVPVKCIGIDTEDHLFQVRSRILTHN                     |
|           | S2  | N2 | PLALNTEVPTPSGWTTVGDLSVGDYVLGSDGQPHRVQRETPVLEGLATYVVRFDGTEITASASHGWTQRLTGHGDSYETVTVTTEELAQTVTNSKGRKRHRIPVVGME                                                                   |
|           |     | C2 | SQHRWVESVTPVESVPVKCIGIDTEDHLFQVRSRILTHN                                                                                                                                        |
|           | S3* | N3 | PLALNTEVPTPSGWTTVGDLSVGDYVLGSDGQPHRVQRETPVLEGLATYVVRFDGTEITASASHGWTQRLTGHGDSYETVTVTTEELAQTVTNSKGRKRHRIPVVGME <b>GSAGSAAGSG</b> SQHRWVESVTPVESVPVKCIGIDTE                       |
|           |     | C3 | DHLFQVRSRILTHN                                                                                                                                                                 |
| MP-M-DnaB | S1* | N1 | ALDVETPILTGN                                                                                                                                                                   |
|           |     | C1 | GWKMGDIQVGDYVHAADGTLARVSYVSEHRWRDCFSVQFADGAELVASDHHLWAVNDRKGERVIDTAELYRTQTYGARGDRRYTIVPEALD <b>GSAGSAAGSG</b> ARTNTITSVTPVPTVETVCIQIDHPSHVFLAGKSLTPHN                          |
|           | S2  | N2 | ALDVETPILTGNWKKMGDIQVGDYVHAADGTLARVSYVSEHRWRDCFSVQFADGAELVASDHHLWAVNDRKGERVIDTAELYRTQTYGARGDRRYTIVPEALD                                                                        |
|           |     | C2 | ARTNTITSVTPVPTVETVCIQIDHPSHVFLAGKSLTPHN                                                                                                                                        |
|           | S3* | N3 | ALDVETPILTGNWKKMGDIQVGDYVHAADGTLARVSYVSEHRWRDCFSVQFADGAELVASDHHLWAVNDRKGERVIDTAELYRTQTYGARGDRRYTIVPEALD <b>GSAGSAAGSG</b> ARTNTITSVTPVPTVETVCIQIDHP                            |
|           |     | C3 | SHVFLAGKSLTPHN                                                                                                                                                                 |
| SaP-dpol  | S1* | N1 | CLHRHTQVLTGD                                                                                                                                                                   |
|           |     | C1 | GFKDIMAVTSTDKVWSGEKWNKGAHLMGWKFPVINVDGVLMTEDHKILTHSWKQAKQLVSNKYMMDRALIGMDAWLSCASYQNDKAKDNYSSNIVERCLG <b>GSAGSAAGSG</b> NLNGKLTycePVYDLIDVEDGNRFLIASDSGFLVAHN                   |
|           | S2  | N2 | CLHRHTQVLTGDGGFKDIMAVTSTDKVWSGEKWNKGAHLMGWKFPVINVDGVLMTEDHKILTHSWKQAKQLVSNKYMMDRALIGMDAWLSCASYQNDKAKDNYSSNIVERCLG                                                              |
|           |     | C2 | NLNGKLTycePVYDLIDVEDGNRFLIASDSGFLVAHN                                                                                                                                          |
|           | S3* | N3 | CLHRHTQVLTGDGGFKDIMAVTSTDKVWSGEKWNKGAHLMGWKFPVINVDGVLMTEDHKILTHSWKQAKQLVSNKYMMDRALIGMDAWLSCASYQNDKAKDNYSSNIVERCLG <b>GSAGSAAGSG</b> NLNGKLTycePVYDLIDVED                       |
|           |     | C3 | GNRFLIASDSGFLVAHN                                                                                                                                                              |
| NrdA-2    | S1* | N1 | CLTGDAKIDVLI                                                                                                                                                                   |
|           |     | C1 | DNIPIQSISLEEVVNLFNEGKEIYVLSYNIDTKEVEYKEISDAGLISESAEVLIEIDEETGQKIVCTPDHKVYTLNRGYVSAKDLKEDDELVFS <b>GSAGSAAGSG</b> GLKIIKRESKEPVFDITVKDNSNFFANNILVHN                             |
|           | S2  | N2 | CLTGDAKIDVLI DNIPIQSISLEEVVNLFNEGKEIYVLSYNIDTKEVEYKEISDAGLISESAEVLIEIDEETGQKIVCTPDHKVYTLNRGYVSAKDLKEDDELVFS                                                                    |
|           |     | C2 | GLKIIKRESKEPVFDITVKDNSNFFANNILVHN                                                                                                                                              |
|           | S3* | N3 | CLTGDAKIDVLI DNIPIQSISLEEVVNLFNEGKEIYVLSYNIDTKEVEYKEISDAGLISESAEVLIEIDEETGQKIVCTPDHKVYTLNRGYVSAKDLKEDDELVFS <b>GSAGSAAGSG</b> GLKIIKRESKEPVFDITVKD                             |
|           |     | C3 | NSNFFANNILVHN                                                                                                                                                                  |
| Mja-KIbA  | S1* | N1 | ALAYDEPIYLS                                                                                                                                                                    |
|           |     | C1 | GNIINIGEFVDFKFFKFKYKNSIKKEDNGFGWIDIGNENIYKSFNKLSLIEDKRILRVWRKKYSGKLIKITTKNRREITLTHDHPVYISKTGEVLEINAEMVKGDIYIYIPKNN <b>GSAGSAAGSG</b> INLDEVIKVETVDYNGHIYDLTVEDNHTYIAGKNEGFAVSN |
|           | S2  | N2 | ALAYDEPIYLS DNIINIGEFVDFKFFKFKYKNSIKKEDNGFGWIDIGNENIYKSFNKLSLIEDKRILRVWRKKYSGKLIKITTKNRREITLTHDHPVYISKTGEVLEINAEMVKGDIYIYIPKNN                                                 |
|           |     | C2 | INLDEVIKVETVDYNGHIYDLTVEDNHTYIAGKNEGFAVSN                                                                                                                                      |
|           | S3* | N3 | ALAYDEPIYLS DNIINIGEFVDFKFFKFKYKNSIKKEDNGFGWIDIGNENIYKSFNKLSLIEDKRILRVWRKKYSGKLIKITTKNRREITLTHDHPVYISKTGEVLEINAEMVKGDIYIYIPKNN <b>GSAGSAAGSG</b> INLDEVIKVETVDYNGHIYDLTVED     |
|           |     | C3 | NHTYIAGKNEGFAVSN                                                                                                                                                               |

<sup>a</sup> The flexible linker sequence is in bold.

**Supplementary Table 5 | List of primers used in this study**

| Primer name             | Sequence                                                               |
|-------------------------|------------------------------------------------------------------------|
| (P001)_pSB3T5_fwd       | TAATAATACTAGTAGCGGCCGCTGCAG                                            |
| (P002)_pSB3T5_rev       | CTCTAGAAGCGGCCGGAATTC                                                  |
| (P003)_P(BAD)-RBS32_fwd | ATTTCGGCGCCGCTTCTAGAGTTATGACAACTTGACGGCTAC                             |
| (P008)_js-Gp41-1-N_rev  | TGCAGCGGCCGCTACTAGTATTATATTCTTTAACATACAGGCACATAC                       |
| (P009)_pSEVA221_fwd     | TACTAGTAGCGGCCGCTGCAGCTTGGACTCCTGTTGATAGATCCAGTAATGAC                  |
| (P010)_pSEVA221_rev     | GGCTAGGCGGCCCTCCTGTG                                                   |
| (P012)_Gp41-1-C-js_fwd  | TACTAGAGTACACAGGAAAGTACTAGATGATGCTGAAAAAATCCTG                         |
| (P089)_mC159(SGY).R     | GTATCCTGAGTCTCCTGGGGTACATCC                                            |
| (P090)_gp41-1N.F        | ACCCCGAGGACTCAGGATACTGTCTGGATCTGAAAAACCCAGG                            |
| (P091)_((SSS)mC160.F    | TCTAGCAGTGGCGCCCTGAAGGGCGAG                                            |
| (P092)_gp41-1C.R        | CTCGCCCTTCAGGGCGCCACTGCTAGAATTATGGGTGAGAATATCATTGG                     |
| (P133)_mC.159.SP1.F     | GTGGATGCTAGCGATCTGGCGCCCTGAAGGGCGAGATCAAGCAG                           |
| (P134)_mC.159.SP1.R     | CAGATCGCTAGCATCCACGTCCTCGGGTACATCCGCTCGGAGG                            |
| (P135)_mC.159.SP2.F     | GGCGAAAAATGCTGGAATGGCGCCCTGAAGGGCGAGATCAAGCAG                          |
| (P136)_mC.159.SP2.R     | ATTCCAGCATTTTCCGCGCTCCTCGGGTACATCCGCTCGGAGG                            |
| (P137)_mC.159.SP4.F     | TTGAACAGGAGTGCAGTGGCGCCCTGAAGGGCGAGATCAAGCAG                           |
| (P138)_mC.159.SP4.R     | AACCGCACTCCTGTTCAAGTCTCCTCGGGTACATCCGCTCGGAGG                          |
| (P139)_mC.159.SP5.F     | AATCCGTGTTTCAGAGATCGCGCCCTGAAGGGCGAGATCAAGCAG                          |
| (P140)_mC.159.SP5.R     | GATCTTGAACACGGATTGTCTCCTCGGGTACATCCGCTCGGAGG                           |
| (P141)_mC.159.SP6.F     | GGTGGAGTTTCGATATCGCGCCCTGAAGGGCGAGATCAAGCAG                            |
| (P142)_mC.159.SP6.R     | GCATATCGAACCTCCACCGTCTCCTCGGGTACATCCGCTCGGAGG                          |
| (P143)_mC.159.SP7.F     | ATTGACGAATGTACACTGGCGCCCTGAAGGGCGAGATCAAGCAG                           |
| (P144)_mC.159.SP7.R     | AGTGTGACATTCGTCATGTCCTCGGGTACATCCGCTCGGAGG                             |
| (P145)_mC.159.SP8.F     | GCAGGTGGTAGTGCAAAGGGCGCCCTGAAGGGCGAGATCAAGCAG                          |
| (P146)_mC.159.SP8.R     | TTTTGCACTACCCTCGCTCCTCGGGTACATCCGCTCGGAGG                              |
| (P147)_mC.159.SP9.F     | ATTGGTTGTTTCGTTTCGACGGCGCCCTGAAGGGCGAGATCAAGCAG                        |
| (P148)_mC.159.SP9.R     | GTGGAACGAACAACCAATGTCTCCTCGGGTACATCCGCTCGGAGG                          |
| (P149)_mC.159.SP10.F    | GGGAGCAAACTGTCATTGGCGCCCTGAAGGGCGAGATCAAGCAG                           |
| (P150)_mC.159.SP10.R    | AATGACAGTTTTGCTCCCGTCTCCTCGGGTACATCCGCTCGGAGG                          |
| (P151)_mC.159.SP11.F    | AGTGGTAAAACGCAATTAGGGCGCCCTGAAGGGCGAGATCAAGCAG                         |
| (P152)_mC.159.SP11.R    | TAATTGCGTTTTTACCCTGTCTCCTCGGGTACATCCGCTCGGAGG                          |
| (P179II)_P(BAD).R       | CTCTAGTAATGGAGAAACAGTAGAGAGTTG                                         |
| (P181)_ECF16.R          | CCGCTACTAGTATTATTAACGATCTTCATCATGACCTTTACC                             |
| (P210)_ECF16.N114.R     | CCGCTACTAGTATTATTAATCATCATCCAGCAGATCATGACGTGC                          |
| (P211)_ECF17.N97.R      | CCGCTACTAGTATTATTAACCGCTCTGATCGGTGCTACCAACAACATTACG                    |
| (P212)_ECF20.N107.R     | CCGCTACTAGTATTATTAATCCAGTGTTCACAGGCATGTTTCG                            |
| (P220)_P(rhaB)-30.R     | CTAGTATTTCTCCTCTTTAATCTCTCTAGTATACGACCAGTCTAAAAAGCCCTCAATTCCG          |
| (P226)_ECF16.C115.F     | AAAGAGGAGAAATACTAGATGACCGGAACAGAGCACCCGGATGAAGTTAATGC                  |
| (P227)_ECF17.C98.F      | AAAGAGGAGAAATACTAGATGACCGGAACAGAGCACCCGGATGAAGTTAATGC                  |
| (P229)_CF20.C108.F      | AAAGAGGAGAAATACTAGATGACCCGTCGGCACCAGGATGAACAGCTGGAAGC                  |
| (P241)_M86.N.F          | CGGATGTACCCCGAGGACGTGGATGCTTGCATCTCGGGAGATAGTTTGTATCAGCTTGG            |
| (P241)_M86.N.F          | CGGATGTACCCCGAGGACGTGGATGCTTGCATCTCGGGAGATAGTTTGTATCAGCTTGG            |
| (P242)_M86.N2.R         | CCGCTACTAGTATTATTTCTAGTTTACGGGGTAGAGCAATATGC                           |
| (P242)_M86.N2.R         | CCGCTACTAGTATTATTTCTAGTTTACGGGGTAGAGCAATATGC                           |
| (P243)_NpuSsp.N.F       | CGGATGTACCCCGAGGACGGCGGAAAATGCCTGAGCTATGAAAACCGAAATCTGACC              |
| (P244)_NpuSsp.N2.R      | CCGCTACTAGTATTATTTAGTTCGGCAGGTTATCCACCGCATCAGATCC                      |
| (P245)_gp41-8.N.F       | CGGATGTACCCCGAGGACTTGAACAGGTGCTGAGCCTGGATACCATTGTTTGTATACC             |
| (P246)_gp41-8.N2.R      | CCGCTACTAGTATTATTTATTTTGCACGGCTACGCAGAAAATCG                           |
| (P247)_NrdJ-1.N.F       | CGGATGTACCCCGAGGACAAATCCGTGTTGCTGTTGGTAGCAGCGAAATCATTACC               |
| (P248)_NrdJ-1.N2.R      | CCGCTACTAGTATTATTAATTTGAACACCAGTTCATCATCATCG                           |
| (P249)_IMPDPH-1.N.F     | CGGATGTACCCCGAGGACGGTGGAGTTGTTTTGTTCCGGGTACTGTTGAATACC                 |
| (P250)_IMPDPH-1.N2.R    | CCGCTACTAGTATTATTTATCCAGCTCGATCAGCAGATGTTTTTTCATATCC                   |
| (P251)_SspDnaX.N.F      | CGGATGTACCCCGAGGACATTGACGAATGCTTAACGGGGACTCACAAAGTTTTGACC              |
| (P252)_SspDnaX.N2.R     | CCGCTACTAGTATTATTTACGACGGGATAGTATCTTTCATTCC                            |
| (P253)_SspGyrB.N.F      | CGGATGTACCCCGAGGACGCAGGTGGTTGTTTTTCTGGAGATACATTAGTCG                   |
| (P254)_SspGyrB.N2.R     | CCGCTACTAGTATTATTTACGCATGACCAGAATCTTCCGTAGTCG                          |
| (P255)_TerThyX.N.F      | CGGATGTACCCCGAGGACATTGTTGTTGTTTTCGGGCAATACAAAAGTTAGATTTAGG             |
| (P256)_TerThyX.N2.R     | CCGCTACTAGTATTATTTACGCTAATTGCATTCACATAATTGAGTGC                        |
| (P257)_TvoVMA.N.F       | CGGATGTACCCCGAGGACGGAGCAAAATGCATATCAGGTGAAAACCCAGTTTACC                |
| (P259)_PhoRadA.N.F      | CGGATGTACCCCGAGGACAGTGGTAAATGCTTTGCTAGGGATACCGAAGTTATATGAAAACG         |
| (P260)_PhoRadA.N2.R     | CCGCTACTAGTATTATTTATCTTCTCAGTACCTCTTCCCTAACACCAACAACAATCTCC            |
| (P262)_M86.C2.F         | AGTCACACAGGAAAGTACTAGATGAGTCTCCTTTTACAATTGGCACCAGAAATAG                |
| (P262)_M86.C2.F         | AGTCACACAGGAAAGTACTAGATGAGTCTCCTTTTACAATTGGCACCAGAAATAG                |
| (P263)_M86.C.R          | CTCGCCCTTCAGGGCGCCAGATCGTGTATGTACAAATGATGTCATTGGCGACAAAAGTTACG         |
| (P263)_M86.C.R          | CTCGCCCTTCAGGGCGCCAGATCGTGTATGTACAAATGATGTCATTGGCGACAAAAGTTACG         |
| (P265)_NpuSsp.C.R       | CTCGCCCTTCAGGGCGCCATTCAGCAGTTTCGCGCAATCGCGCCCTTCGCCAGC                 |
| (P267)_gp41-8.C.R       | CTCGCCCTTCAGGGCGCCAAACCGCACTATTATGGGTGAGAATACCATTGGCAAAAAACAGACG       |
| (P268)_NrdJ-1.C2.F      | AGTCACACAGGAAAGTACTAGATGGAAGCCAAAACCTATATCGGCAAACTG                    |
| (P269)_NrdJ-1.C.R       | CTCGCCCTTCAGGGCGCCGATCTCTGAATTATGCACCAGAAATCATTGGCGAAAAAGTTATG         |
| (P271)_IMPDPH-1.C.R     | CTCGCCCTTCAGGGCGCCATTCGAAATATGAAACACGGTGGCCAGCAAGTTATAGC               |
| (P273)_SspDnaX.C.R      | CTCGCCCTTCAGGGCGCCAGTGTGACAGTTATGGACTAGTAAGCCATTGGCAAC                 |
| (P274)_SspGyrB.C2.F     | AGTCACACAGGAAAGTACTAGATGGAAGCAGTATTAATTAACAATCAGAAATTG                 |
| (P275)_SspGyrB.C.R      | CTCGCCCTTCAGGGCGCCCTTTGCACTGTTATGGACAAACACTCCGCTTGCCAAAAGC             |
| (P277)_TerThyX.C.R      | CTCGCCCTTCAGGGCGCCCTGCAACGAATATGAAACAACTAAACCTGGCTATAAAAATTATGTTTC     |
| (P279)_TvoVMA.C.R       | CTCGCCCTTCAGGGCGCCAAATGACAGTGTGTTGAGTACGAGAAGTCTTCTCC                  |
| (P281)_PhoRadA.C.R      | CTCGCCCTTCAGGGCGCCATTTGCGTATTATGGAGAACAGTCCATTGGGAGCTATGAAG            |
| (P293)_33-ECF20.F       | GTTTCTCCATTACTAGAGTACACAGGACTACTAGATGAATGAAAACCGATCTCTG                |
| (P298)_30.mCstar.F      | GTTTCTCCATTACTAGAGATTAAGAGGAGAAATACTAGATGGTGGAGCAAGGGCGAAGAAGACAACATGG |

|        |                     |                                                                             |
|--------|---------------------|-----------------------------------------------------------------------------|
| (P306) | _30-NpuSsp.C2.F     | GTTTCTCCATTACTAGAGATTAAGAGGAGAAATACTAGATGGTGAAAGTGATTGG                     |
| (P307) | _30-gp41-1.C2.F     | GTTTCTCCATTACTAGAGATTAAGAGGAGAAATACTAGATGCTGAAAAAATCCTGAAAAATCG             |
| (P308) | _30-gp41-8.C2.F     | GTTTCTCCATTACTAGAGATTAAGAGGAGAAATACTAGATGTGTGAAATCTTTGAAAAACG               |
| (P309) | _30-NrdJ-1.C2.F     | GTTTCTCCATTACTAGAGATTAAGAGGAGAAATACTAGATGGAAGCCAAAAACCTATATCGGCAAAAC        |
| (P315) | _30-PhoRadA.C2.F    | GTTTCTCCATTACTAGAGATTAAGAGGAGAAATACTAGATGAGAATAATATCCAAAGGAGAACTTG          |
| (P329) | _30-ST-IMPDH-1.C2.F | GAGGAGAAATACTAGATGACAGATGTAACGATTAATAAATCAAACCTGAAAGAGATCACCAGC             |
| (P330) | _30-ST-SspDnaX.C2.F | GAGGAGAAATACTAGATGACAGATGTAACGATTAACCCGCAATGGCATACAAAATTTCCGAGG             |
| (P332) | _30-ST-TerThyX.C2.F | GAGGAGAAATACTAGATGACAGATGTAACGATTAAGAGGTGTTTTGTGAGATAGAATCTATTG             |
| (P337) | _M86.N1.R           | CCGCTACTAGTATTATTATGTGCTCGCCAAGCTGATCAAACATCTCTCC                           |
| (P338) | _NpuSsp.N1.R        | CCGCTACTAGTATTATTAAATATCCACGGTTCAGAAATTCGGTTTCATAGC                         |
| (P339) | _gp41-1.N1.R        | CCGCTACTAGTATTATTACTGCGGTGTCTGAACCTGGGTTTTCAGATC                            |
| (P340) | _gp41-8.N1.R        | CCGCTACTAGTATTATTAAATGGTAAACAACCATGGTATCCAGGCTCAGAC                         |
| (P341) | _NrdJ-1.N1.R        | CCGCTACTAGTATTATTAAATAATACGGGTAAATGATTTCCGCTGCTACC                          |
| (P342) | _IMPDH-1.N1.R       | CCGCTACTAGTATTATTAAATTTCCGGTATTCACAGTGTACCCGGAAAC                           |
| (P343) | _SspDnaX.N1.R       | CCGCTACTAGTATTATTAAATGCGGGTCAAACCTGTGTAGTCCCCCGTTAAG                        |
| (P344) | _SspGyrB.N1.R       | CCGCTACTAGTATTATTAAATCAGTAAAGCGCATTAATGTATCTCCAG                            |
| (P345) | _TerThyX.N1.R       | CCGCTACTAGTATTATTACGAATACCTAAATCTAACTTTTGTATTGC                             |
| (P346) | _TvoVMA.N1.R        | CCGCTACTAGTATTATTAAATCCGCAAGGTAACCTGGTGTTCACCTG                             |
| (P347) | _PhoRadA.N1.R       | CCGCTACTAGTATTATTAAATCGTTTCATAATAAACTTCGGTATCCCTAG                          |
| (P348) | _M86.N3.R           | CCGCTACTAGTATTATTACTGCGCAGTCAAATCAAACCTTCCTG                                |
| (P349) | _NpuSsp.N3.R        | CCGCTACTAGTATTATTACTGCGCAGGCCAATCAAATAATGCGCTGC                             |
| (P350) | _gp41-1.N3.R        | CCGCTACTAGTATTATTAAACCGTAACTTCAATATCAATCAGTTCCG                             |
| (P351) | _gp41-8.N3.R        | CCGCTACTAGTATTATTAAATGGTACGTTAATATCGATGGTTTCTTCC                            |
| (P352) | _NrdJ-1.N3.R        | CCGCTACTAGTATTATTAGCTGGTTCGAAATCATAGGTATCCTCGTTCG                           |
| (P353) | _IMPDH-1.N3.R       | CCGCTACTAGTATTATTACTGATTACCGGTACAGATCATGAACCTTTCG                           |
| (P354) | _SspDnaX.N3.R       | CCGCTACTAGTATTATTAAATCTCCACCTCCAGGTCATAAACTTTTTC                            |
| (P355) | _SspGyrB.N3.R       | CCGCTACTAGTATTATTAGTGGGGAACCTCAATATCATAAATCGATTTGTTTC                       |
| (P356) | _TerThyX.N3.R       | CCGCTACTAGTATTATTAGTGTTCGACTTCAAGATCATAAGTAATTTCTTTCG                       |
| (P357) | _TvoVMA.N3.R        | CCGCTACTAGTATTATTATCTGGTACGGAAGATCGTATACATCAAATCAC                          |
| (P358) | _PhoRadA.N3.R       | CCGCTACTAGTATTATTATTCGGGAATTACAAGGTCGTAGACC                                 |
| (P370) | _M86.C1.F           | GAGGAGAAATACTAGATGGGGAAGAGTTCCTATTAAGGATTTGTTAGGCGAAAAAGATTTTGAAATATGG      |
| (P371) | _NpuSsp.C1.F        | GAGGAGAAATACTAGATGGGCAAGCTGCGGATTTGGCAAAATTTGTTGAAAAACGCTTG                 |
| (P372) | _gp41-1.C1.F        | GAGGAGAAATACTAGATGGGTATGAAAGAAATTTCAAATATTCAGGTGGGTGATCTGGTCTGAGC           |
| (P373) | _gp41-8.C1.F        | GAGGAGAAATACTAGATGGGTAAAGCCATTTGAAATTCGTGATGTGAAAGTTGGTGATTTGGCTGG          |
| (P374) | _NrdJ-1.C1.F        | GAGGAGAAATACTAGATGGGTAAACCACCATCAAAGAAGTGGTCGAGATCTTCGATAACGAC              |
| (P375) | _IMPDH-1.C1.F       | GAGGAGAAATACTAGATGGGTCTGAAAAAATCGAAGAAATCAAAGTGGGCGCAAAAGTGTTCG             |
| (P376) | _SspDnaX.C1.F       | GAGGAGAAATACTAGATGGGCTTAATGTCCATTGCAATCCCAAAATAAAAGGGCGAGAAG                |
| (P377) | _SspGyrB.C1.F       | GAGGAGAAATACTAGATGGGTCTGAGCTTAGCTTTGAGCAATTTGGTGAAGAAGAAAAACAAGG            |
| (P378) | _TerThyX.C1.F       | GAGGAGAAATACTAGATGTCTTCATCCCAAGAAGCGAAATTTATGAGGAAACAATGAAAAATAGCTAACTTATGG |
| (P379) | _TvoVMA.C1.F        | GAGGAGAAATACTAGATGGGCAAGACAATAAAAAATAAGGATCTATACAGTCTGAGAGAAAAAAGAAAG       |
| (P380) | _PhoRadA.C1.F       | GAGGAGAAATACTAGATGACGGTACCACACATGGAATCAATGAGGAGATGTATAGTAAATACG             |
| (P381) | _M86.C3.F           | GAGGAGAAATACTAGATGCTACGTAACCTTTGTGCGCAATGACATCATGTACATAAC                   |
| (P382) | _NpuSsp.C3.F        | GAGGAGAAATACTAGATGGATCATAACTTTCTGCTGGCGAAGCGGCGGATTCG                       |
| (P383) | _gp41-1.C3.F        | GAGGAGAAATACTAGATGAACCACTGTTCTATGCCAATGATATCTCGACC                          |
| (P384) | _gp41-8.C3.F        | GAGGAGAAATACTAGATGGATCGTCTGTTTTTTGCCAATGGTATTCTGACC                         |
| (P385) | _NrdJ-1.C3.F        | GAGGAGAAATACTAGATGACCCATAACTTTTTCGCAATGATATCTGGTGC                          |
| (P386) | _IMPDH-1.C3.F       | GAGGAGAAATACTAGATGGATCATAGCTATAACGTTCTGGCACCCTTG                            |
| (P387) | _SspDnaX.C3.F       | GAGGAGAAATACTAGATGAATCAAAATTTTGTGCAATGGCTTACTAGTCC                          |
| (P388) | _SspGyrB.C3.F       | GAGGAGAAATACTAGATGACCCACAATTTTGTCTTTGGCAAGCGGAGTG                           |
| (P389) | _TerThyX.C3.F       | GAGGAGAAATACTAGATGCCAGACATAAATTTTATAGCCAATGGTTTGTG                          |
| (P390) | _TvoVMA.C3.F        | GAGGAGAAATACTAGATGTACGGCAGGAACCTTATAGGCGGAGAAGG                             |
| (P391) | _PhoRadA.C3.F       | GAGGAGAAATACTAGATGACCCACAACCTTCATAGCTCCCAATGGACTTTGTTCC                     |
| (P403) | _mC.F               | GGCGCCTGAAGGGCGAGATCAAGCAGAGGCTGAAGC                                        |
| (P404) | _mC.R               | GTCTCTCGGGTACATCCGCTCGGAGGAGGCTCCAGC                                        |
| (P405) | _Int.F              | GCCTCTCCGAGCGGATGTACCCGAGG                                                  |
| (P406) | _Int.R              | CCTCTGCTTGATCTCGCCCTCAGG                                                    |
| (P407) | _mC.159.SP12.F      | GTGAATCAGTCCGGGAGGGGGCCCTGAAGGGCGAGATCAAGCAG                                |
| (P408) | _mC.159.SP12.R      | CCTCCCGGACTGATTCACGTCCTCGGGTACATCCGCTCGGAGG                                 |
| (P409) | _mC.159.SP13.F      | GATAAATCTCAACCAAGGGCGCCCTGAAGGGCGAGATCAAGCAG                                |
| (P410) | _mC.159.SP13.R      | TTTGGTTGAGAATTTATCGTCCTCGGGTACATCCGCTCGGAGG                                 |
| (P411) | _mC.159.SP14.F      | GGCAGTAAGTGTCAAACGGCGCCCTGAAGGGCGAGATCAAGCAG                                |
| (P412) | _mC.159.SP14.R      | GTTTGAGCACTTACTGCCGTCCTCGGGTACATCCGCTCGGAGG                                 |
| (P413) | _mC.159.SP15.F      | TCGAATCTCTGCTCAGAGGGCGCCCTGAAGGGCGAGATCAAGCAG                               |
| (P414) | _mC.159.SP15.R      | CTCTGAGCAGAGATTCGAGTCCCTCGGGTACATCCGCTCGGAGG                                |
| (P415) | _mC.159.SP16.F      | AAGCATCACTCAGTCTTGGCGCCCTGAAGGGCGAGATCAAGCAG                                |
| (P416) | _mC.159.SP16.R      | AAGGACTGAGTGATGCTTGTCTCGGGTACATCCGCTCGGAGG                                  |
| (P417) | _mC.159.SP17.F      | CATGGTAAATCCGAGCTGGGCGCCCTGAAGGGCGAGATCAAGCAG                               |
| (P418) | _mC.159.SP17.R      | CAGCTCGGATTTACCATGTTCTCGGGTACATCCGCTCGGAGG                                  |
| (P419) | _mC.159.SP18.F      | GCTAGCTGTTGCTGCTCGGGCGCCCTGAAGGGCGAGATCAAGCAG                               |
| (P420) | _mC.159.SP18.R      | GAGACGACAACAGCTAGCGTCCCTCGGGTACATCCGCTCGGAGG                                |
| (P421) | _mC.159.SP19.F      | AATGGGAAAATCACTCCGCGCCCTGAAGGGCGAGATCAAGCAG                                 |
| (P422) | _mC.159.SP19.R      | GAGGGTAGTTTTCCCATTTGTCCTCGGGTACATCCGCTCGGAGG                                |
| (P423) | _mC.159.SP20.F      | AATGGGAAGTCGGAGTTAGGCGCCCTGAAGGGCGAGATCAAGCAG                               |
| (P424) | _mC.159.SP20.R      | TAACCTCCGACTTCCCATTTGTCCTCGGGTACATCCGCTCGGAGG                               |
| (P425) | _mC.159.SP21.F      | CACGGTAAAACCGAGGTCGGCGCCCTGAAGGGCGAGATCAAGCAG                               |
| (P426) | _mC.159.SP21.R      | GACCTCGGTTTTACCGTGGTCTCGGGTACATCCGCTCGGAGG                                  |
| (P427) | _mC.159.SP22.F      | GCCAAGGCATGCAATTTCCGCGCCCTGAAGGGCGAGATCAAGCAG                               |
| (P428) | _mC.159.SP22.R      | GAAATTCATGCCTTGGCGTCCCTCGGGTACATCCGCTCGGAGG                                 |
| (P429) | _mC.159.SP23.F      | GCCACTGGGTGCGGGAAGGGCGCCCTGAAGGGCGAGATCAAGCAG                               |
| (P430) | _mC.159.SP23.R      | CTTCCCGCACCCAGTGGCGTCCCTCGGGTACATCCGCTCGGAGG                                |
| (P431) | _mC.159.SP24.F      | CAGGATCAGACAAAAATGGCGCCCTGAAGGGCGAGATCAAGCAG                                |

|                       |                                                                        |
|-----------------------|------------------------------------------------------------------------|
| (P432)_mC.159.SP24.R  | ATTTTTGGTCTGATCCTGGTCCTCGGGGTACATCCGCTCGGAGG                           |
| (P433)_mC.159.SP25.F  | AACCATGATTCACGGGGCGGGCCCTGAAGGGCGAGATCAAGCAG                           |
| (P434)_mC.159.SP25.R  | CGCCCGTGAATCATGGTTGTCCCTCGGGGTACATCCGCTCGGAGG                          |
| (P435)_mC.159.SP26.F  | GAGCTGAAGACACAAAATGGCGCCCTGAAGGGCGAGATCAAGCAG                          |
| (P436)_mC.159.SP26.R  | ATTTTGTGTCTTCAGCTCGTCCTCGGGGTACATCCGCTCGGAGG                           |
| (P437)_mC.159.SP27.F  | AACGGGAAAACAGAAATGGGGCCCTGAAGGGCGAGATCAAGCAG                           |
| (P438)_mC.159.SP27.R  | CAATTCTGTTTTCCCGTTGTCCCTCGGGGTACATCCGCTCGGAGG                          |
| (P439)_mC.159.SP28.F  | GCAGGCAAGTCCCTTACTGGCGCCCTGAAGGGCGAGATCAAGCAG                          |
| (P440)_mC.159.SP28.R  | AGTAAGGGACTTGCCTGCGTCCTCGGGGTACATCCGCTCGGAGG                           |
| (P441)_mC.159.SP29.F  | GGAAAGGCTTGCAGACTGGGGCCCTGAAGGGCGAGATCAAGCAG                           |
| (P442)_mC.159.SP29.R  | CAGTTCGCAGGCCTTCCGTCCTCGGGGTACATCCGCTCGGAGG                            |
| (P443)_mC.159.SP30.F  | AGCGCAAGACGAGTTCTGGCGCCCTGAAGGGCGAGATCAAGCAG                           |
| (P444)_mC.159.SP30.R  | AGAACTCGTCTTGCCGCTGTCCCTCGGGGTACATCCGCTCGGAGG                          |
| (P445)_mC.159.SP31.F  | TCAAACCTTTGCAATGAGGGCGCCCTGAAGGGCGAGATCAAGCAG                          |
| (P446)_mC.159.SP31.R  | CTCATTTGCAAAGGTTTGTAGTCTCGGGGTACATCCGCTCGGAGG                          |
| (P447)_mC.159.SP32.F  | GGGGGCGGCACAGGCTTAGGGCCCTGAAGGGCGAGATCAAGCAG                           |
| (P448)_mC.159.SP32.R  | TAAGCCTGTGCCGCCCTCGTCCTCGGGGTACATCCGCTCGGAGG                           |
| (P449)_mC.159.SP33.F  | CACGATGGATGCTCGGGTGGCGCCCTGAAGGGCGAGATCAAGCAG                          |
| (P450)_mC.159.SP33.R  | ACCCGAGCATCCATCGTGGTCTCGGGGTACATCCGCTCGGAGG                            |
| (P451)_ECF20.SP1.F    | GTGGATGCTAGCATCTGGCACCGGATGAACAGCTGGAAGCAAGC                           |
| (P452)_ECF20.SP1.R    | CAGATCGCTAGCATCCACTTCACAGGCATGTTTCGCTATCAACCGGCAC                      |
| (P455)_ECF20.SP3.F    | TCAGGATACTCTAGCAGTGCACCGGATGAACAGCTGGAAGCAAGC                          |
| (P456)_ECF20.SP3.R    | ACTGTAGAGTATCCTGATTCACAGGCATGTTTCGCTATCAACCGGCAC                       |
| (P457)_ECF20.SP4.F    | TTGAAACAGGAGTGCCTGTGACCCGGATGAACAGCTGGAAGCAAGC                         |
| (P458)_ECF20.SP4.R    | AACCGCACTCCTGTTCAATTCACAGGCATGTTTCGCTATCAACCGGCAC                      |
| (P459)_ECF20.SP5.F    | AATCCGTGTTTCAGAGATCGCACCGGATGAACAGCTGGAAGCAAGC                         |
| (P460)_ECF20.SP5.R    | GATCTCTGAACACGGATTTTTCACAGGCATGTTTCGCTATCAACCGGCAC                     |
| (P465)_ECF20.SP8.F    | GCAGGTGGTAGTGCAAAAGCACCCGGATGAACAGCTGGAAGCAAGC                         |
| (P466)_ECF20.SP8.R    | TTTTGCACTACCACCTGCTTCACAGGCATGTTTCGCTATCAACCGGCAC                      |
| (P815)_ECF20.SP20.F   | AATGGGAAGTCGGAGTTAGCACCGGATGAACAGCTGGAAGCAAGC                          |
| (P816)_ECF20.SP20.R   | TAACCTCCGACTTCCCATTTCACAGGCATGTTTCGCTATCAACCGGCAC                      |
| (P756)_ECF20.SP33.F   | CACGATGGATGCTCGGGTGCACCGGATGAACAGCTGGAAGC                              |
| (P757)_ECF20.SP33.R   | ACCCGAGCATCCATCGTGGTTCACAGGCATGTTTCGCTATCAACC                          |
| (P483)_33-ECF20.N.R   | TTACAGGCATGTTTCGCTATCAACCGGCAC                                         |
| (P484)_E20N.M86.F     | AGCGAACATGCCTGTGAAGTGGATGCTTGCATCTCGGGAGATAGTTTGTATCAGC                |
| (P493)_E20C.F         | ACCCGTCGGCACCGGATGAACAGCTGGAAGC                                        |
| (P494)_P(rhaB)-32.R   | CTAGTACTTTCCCTGTGTGACTCTAGTATACACCAGCTCAAAAAAGCGCTCAATTCCGCGACC        |
| (P495)_E20C.M86.R     | ATCCGGTGCCTGACGGGTACAGATCGCTGTTATGTACAAATGATGTCATTTGGCGACAAAAGTTACG    |
| (P937)_ECF17.SP1.F    | GTGGATGCTAGCGATTTACAGAGCACACCGGATGAAGTTAATGCAGCACTGG                   |
| (P938)_ECF17.SP1.R    | TAAATCGCTAGCATCCACATCCGGTGTACCAACAACATTACGAAAAACGTGC                   |
| (P941)_ECF17.SP3.F    | TCAGGATACTCTAGCAGTACAGCACACCGGATGAAGTTAATGCAGCACTGG                    |
| (P942)_ECF17.SP3.R    | ACTGCTAGAGTATCCTGAAATCGGTGTACCAACAACATTACGAAAAACGTGC                   |
| (P943)_ECF17.SP4.F    | TTGAAACAGGAGTGCCTGTGACAGCACACCGGATGAAGTTAATGCAGCACTGG                  |
| (P944)_ECF17.SP4.R    | AACCGCACTCCTGTTCAACAGCAGATCATGACGTGCTTCACGACGTGCATGG                   |
| (P514)_ECF17.SP5.F    | AATCCGTGTTTCAGAGATCCAGAGCACACCGGATGAAGTTAATGCAGCACTGG                  |
| (P515)_ECF17.SP5.R    | GATCTCTGAACACGGATTTATCGGTGTACCAACAACATTACGAAAAACGTGC                   |
| (P532)_ECF17.SP8.F    | GCAGGTGGTAGTGCAAAACAGAGCACACCGGATGAAGTTAATGCAGCACTGG                   |
| (P533)_ECF17.SP8.R    | TTTTGCACTACCACCTGCATCGGTGTACCAACAACATTACGAAAAACGTGC                    |
| (P955)_ECF17.SP20.F   | AATGGGAAGTCGGAGTTACAGAGCACACCGGATGAAGTTAATGCAGCACTGG                   |
| (P956)_ECF17.SP20.R   | TAACCTCCGACTTCCCATTATCGGTGTACCAACAACATTACGAAAAACGTGC                   |
| (P794)_ECF17.SP33.F   | CACGATGGATGCTCGGGTACAGAGCACACCGGATGAAGTTAATGC                          |
| (P795)_ECF17.SP33.R   | ACCCGAGCATCCATCGTGTGATCGGTGTACCAACAACATTACGAAAAACGTGC                  |
| (P52)_mC.R            | CCGCTACTAGTATTATTAGTGGTGTGGTGTGATGCTTGTACAGCTCGTCCATGCCCGCGGTGG        |
| (P903)_ECF16.SP1.F    | GTGGATGCTAGCGATCTGTTTGCAGCAAGTGTGATGAACAGCCTGCACAGG                    |
| (P904)_ECF16.SP1.R    | CAGATCGCTAGCATCCACCAGCAGATCATGACGTGCTTCACGACGTGCATGG                   |
| (P907)_ECF16.SP3.F    | TCAGGATACTCTAGCAGTTTTGTCAGCAAGTGTGATGAACAGCCTGCACAGG                   |
| (P908)_ECF16.SP3.R    | ACTGCTAGAGTATCCTGACAGCAGATCATGACGTGCTTCACGACGTGCATGG                   |
| (P909)_ECF16.SP4.F    | TTGAAACAGGAGTGCCTGTTTTGTCAGCAAGTGTGATGAACAGCCTGCACAGG                  |
| (P910)_ECF16.SP4.R    | AACCGCACTCCTGTTCAACAGCAGATCATGACGTGCTTCACGACGTGCATGG                   |
| (P512)_ECF16.SP5.F    | AATCCGTGTTTCAGAGATCTTTGTCAGCAAGTGTGATGAACAGCCTGCACAGG                  |
| (P513)_ECF16.SP5.R    | GATCTCTGAACACGGATTCAGCAGATCATGACGTGCTTCACGACGTGCATGG                   |
| (P530)_ECF16.SP8.F    | GCAGGTGGTAGTGCAAAATTTGTCAGCAAGTGTGATGAACAGCCTGCACAGG                   |
| (P531)_ECF16.SP8.R    | TTTTGCACTACCACCTGCCAGCAGATCATGACGTGCTTCACGACGTGCATGG                   |
| (P921)_ECF16.SP20.F   | AATGGGAAGTCGGAGTTATTGTCAGCAAGTGTGATGAACAGCCTGCACAGG                    |
| (P922)_ECF16.SP20.R   | TAACCTCCGACTTCCCATTTCAGCAGATCATGACGTGCTTCACGACGTGCATGG                 |
| (P754)_ECF16.SP33.F   | CACGATGGATGCTCGGGTTTTGTCAGCAAGTGTGATGAACAGC                            |
| (P755)_ECF16.SP33.R   | ACCCGAGCATCCATCGTGCAGCAGATCATGACGTGCTTCACG                             |
| (P544)_NpuSsp.Ln.F    | CGGTTACAGCGCGGTTTCGGGAGTGAAGTGTGTTGGCCGCCGAGCCTGGGCGTGC                |
| (P545)_NpuSsp.Ln.R    | GAACCGCCGCTGAACCGGCTGATCCGTTTCGGCAGGTTATCCACGCGCATCAGATCC              |
| (P546)_TerThyX.Ln.F   | GGTTACAGCGCGGTTTCGGGAGTGTTTTTGTAGAGATAGAATCTATTGAAAAATTTGGCAAAGAAATTAC |
| (P547)_TerThyX.Ln.R   | CGAACCGCCGCTGAACCGGCTGATCCCGCTAATGCACTTCACATAATTGAGTGTCTTTAAAAATC      |
| (P554)_Ama-Ter.N2.R   | CCGCTACTAGTATTATTATTTCATACCCACTACAGGGATGCGATGACG                       |
| (P555)_Cth-Ter.N2.R   | CCGCTACTAGTATTATTAAATGAACCGCTCCGCGATCGGTATACGAAACAGG                   |
| (P556)_LLP-Pol.N2.R   | CCGCTACTAGTATTATTAAACAGACGCTGCATGAGAGTGTCTACCTCTTCG                    |
| (P557)_LP-Hel.N2.R    | CCGCTACTAGTATTATTAAATCGAAGCCAAAGCGCTGTAATTTTGACGGTGC                   |
| (P558)_MP-B-DnaB.N2.R | CCGCTACTAGTATTATTATTCATACCCACTACAGGGATGCGATGACG                        |
| (P560)_MP-M-DnaB.N2.R | CCGCTACTAGTATTATTAAATCCAAAGCTTCGGCACCGTAACAGTGTAAACG                   |
| (P561)_SaP-dpol.N2.R  | CCGCTACTAGTATTATTAGCCAGGACCGCTTCACCAATAACGTTACTACTG                    |
| (P563)_NrdA-2.N2.R    | CCGCTACTAGTATTATTAGCTAAACACAGCTCATCGTCTTCTTTGAGATCC                    |
| (P564)_Mja-KibA.N2.R  | CCGCTACTAGTATTATTACTGTTATTTTTTCGGGATGTAATGTAATCACCAGCTTTAAAC           |
| (P567)_Ama-Ter.C2.F   | GAGGAGAAATACTAGATGGAGCGCCGCTTTCCATAGAGAAAGTAGAATATCTTCC                |

|                          |                                                                                                    |
|--------------------------|----------------------------------------------------------------------------------------------------|
| (P568)_Cth-Ter.C2.F      | GAGGAGAAAATACTAGATGTCTCACTTCCACTACATAAAAGTCTATTGAAAAAACCCGGGAAAAACC                                |
| (P569)_LLP-Pol.C2.F      | GAGGAGAAAATACTAGATGTCTTTCCCTGGGAAGGCATTCCTACAGGCCCGAGTTATAAAAG                                     |
| (P57)_mC.159.SP3.R       | GCGCCACTGTAGAGTATCCTGAGTCCCTCGGGGTACATCCGCTCGGAGG                                                  |
| (P570)_LP-Hel.C2.F       | GAGGAGAAAATACTAGATGCGCGTTGACGTACCGGGGTTAAAGTTGAGCCCATTTGG                                          |
| (P571)_MP-B-DnaB.C2.F    | GAGGAGAAAATACTAGATGTCCAGCATCGGTGGGTTGAATCAGTAACACC                                                 |
| (P572)_MP-C-gp206.C2.F   | GAGGAGAAAATACTAGATGCTGCGTTTAAACGCCATTGTTGACGTAGAACCCGGTGG                                          |
| (P574)_SaP-dpol.C2.F     | GAGGAGAAAATACTAGATGAATCTGAACGGCAAACCTGACGTACTGTGAACCCAG                                            |
| (P576)_NrdA-2.C2.F       | GAGGAGAAAATACTAGATGGGTTTAAAAATATAAAACGTGAATCAAAGAACCCAGTGTGGAC                                     |
| (P577)_Mja-KIbA.C2.F     | GAGGAGAAAATACTAGATGATTAACCTGGATGAAGTAATCAAAGTTGAAACAGTGGAC                                         |
| (P58)_mC.159.SP3.F       | AGGACTCAGGATACTCTAGCAGTGGCGCCCTGAAGGGCGAGATCAAGCAG                                                 |
| (P581)_TvoVMA.N2.v2.R    | CCGCTACTAGTATTATTACACGCATTCTCCGCTCATTCCGCGAGTCTCTTGC                                               |
| (P583)_30-TvoVMA.C2.v2.F | GAGGAGAAAATACTAGATGGAAGCAGAAGTTTATACGTCACTTGAAGC                                                   |
| (P586)_Ama-Ter.N1.R      | CCGCTACTAGTATTATTAAACGGTTCGCAGTCAGCACAGGGGTGCTATGTGCAATATTTTTACC                                   |
| (P587)_Cth-Ter.N1.R      | CCGCTACTAGTATTATTAACTCGGAGTAGGGATAGGTGATCAAGCCGCAAGCTGCTTCC                                        |
| (P588)_LLP-Pol.N1.R      | CCGCTACTAGTATTATTAGTATGGCGTCAAGATTTCCGGTATCTCCTGAAAAGCATGC                                         |
| (P589)_LP-Hel.N1.R       | CCGCTACTAGTATTATTAACTCGGACATCATATATCATGTCCGTAAGCATGGCACC                                           |
| (P590)_MP-B-DnaB.N1.R    | CCGCTACTAGTATTATTAACTCGGTGTGGGAACCTCAGTATTTAGTGCCAAATGG                                            |
| (P591)_MP-M-DnaB.N1.R    | CCGCTACTAGTATTATTAGTGTGCCAGTGGGATTTGGTGTTCACATCCAACGCTTTCC                                         |
| (P592)_SaP-dpol.N1.R     | CCGCTACTAGTATTATTAGCCATCAGTAAGAACCTGAGTGTGTCGATGCAGGCAGG                                           |
| (P594)_NrdA-2.N1.R       | CCGCTACTAGTATTATTAGATAAGTACGTGATTTTAGCATCGCCCGTGGACAAAGG                                           |
| (P595)_Mja-KIbA.N1.R     | CCGCTACTAGTATTATTAACTCGGACAGATAGATGGGTTGTCATAGGCCAGCGCTCC                                          |
| (P597)_Ama-Ter.N3.R      | CCGCTACTAGTATTATTAACTCCACCTGAATGCAATGGCCCTTCTCCCGTTAGGAAG                                          |
| (P598)_Cth-Ter.N3.R      | CCGCTACTAGTATTATTAACTCCACCTGTATACACCCGCATCTGGTTTTCCCGGTTTTTTC                                      |
| (P599)_LLP-Pol.N3.R      | CCGCTACTAGTATTATTAGGGGACGTTGACGCAATACAGTCCCTTTTATAACTCG                                            |
| (P600)_LP-Hel.N3.R       | CCGCTACTAGTATTATTAAACCGTCGACGGTAAAGCCATAGTAATCCCCACGCCAATGG                                        |
| (P601)_MP-B-DnaB.N3.R    | CCGCTACTAGTATTATTATTCGGTATCAATACCAATGCATTTAACCCGGAACGCTCTCAACG                                     |
| (P602)_MP-M-DnaB.N3.R    | CCGCTACTAGTATTATTACGGATGATCAATCTGTATACATACCGTCTCTACGGTAGG                                          |
| (P603)_SaP-dpol.N3.R     | CCGCTACTAGTATTATTAGTCTCCACATCTATTAGATCATAAACTGGTTCACAGTACG                                         |
| (P605)_NrdA-2.N3.R       | CCGCTACTAGTATTATTAACTTTGACAGTAATGTCAAACACTGGTTCCTTTGATTACAG                                        |
| (P606)_Mja-KIbA.N3.R     | CCGCTACTAGTATTATTAACTCGCGGTTAAATCATAAATGTGGCCATTATAGTCC                                            |
| (P608)_Ama-Ter.C1.F      | GAGGAGAAAATACTAGATGGGGTGGGTGACACATGGGGATCTAGTTCCTGGAGATCAGG                                        |
| (P609)_Cth-Ter.C1.F      | GAGGAGAAAATACTAGATGGGTTGGGTTGGACAAACATGGGAGAGATCAAAGCCGGGACAAGG                                    |
| (P610)_LLP-Pol.C1.F      | GAGGAGAAAATACTAGATGGGTTGGGTTGAAGTTTGAAGATTACGACGAAAGCATGATGTGTGC                                   |
| (P611)_LP-Hel.C1.F       | GAGGAGAAAATACTAGATGGGTACTAAGAAACAGGTTGAGGATATTGACGTAGGCGAC                                         |
| (P612)_MP-B-DnaB.C1.F    | GAGGAGAAAATACTAGATGGGATGGACAACCGTGGTGTGATCTGAGCGTCCGGGATTATG                                       |
| (P613)_MP-M-DnaB.C1.F    | GAGGAGAAAATACTAGATGGGTTGGAAAAAGATGGCGGACATACAAGTCGGGACTACGTG                                       |
| (P614)_SaP-dpol.C1.F     | GAGGAGAAAATACTAGATGGGATTTAAAGATATCATGGCCGTTACCAGTACTGATAAAGTCTGG                                   |
| (P616)_NrdA-2.C1.F       | GAGGAGAAAATACTAGATGGATAAATATTCCTATCTCCAGATATCCCTGGAGG                                              |
| (P617)_Mja-KIbA.C1.F     | GAGGAGAAAATACTAGATGGGCAACATTATAAAATATTGGTGAATTTGTTGATAAAATTTTTTC                                   |
| (P619)_Ama-Ter.C3.F      | GAGGAGAAAATACTAGATGAGCCAGACCGTCTGTATTATTAGTAGGGAAGAACTTGTTCG                                       |
| (P620)_Cth-Ter.C3.F      | GAGGAGAAAATACTAGATGAGTCTTCCCGTCTGTATCTCGCCGGCAAACTCTATGATACC                                       |
| (P621)_LLP-Pol.C3.F      | GAGGAGAAAATACTAGATGACTCATAAATATTGTAATTCGTACAACGATAAGGTGAGC                                         |
| (P623)_MP-B-DnaB.C3.F    | GAGGAGAAAATACTAGATGGATCATCTTTCCAGGTGAGTCGCAGCCGAATCTTAACACAC                                       |
| (P624)_MP-M-DnaB.C3.F    | GAGGAGAAAATACTAGATGTCGATGTGTTTCTGGCTGGTAAAAAGTCTGACCCCACTC                                         |
| (P625)_SaP-dpol.C3.F     | GAGGAGAAAATACTAGATGGGTAACCGATTCTAATTTGCGTCAGATTTCCGGTTTTTTAGTGG                                    |
| (P626)_SaP-Hel.C3.F      | GAGGAGAAAATACTAGATGGATTCCTCGGTTCTATTGGGTGATTTTACAGTTACCCATAACACG                                   |
| (P627)_NrdA-2.C3.F       | GAGGAGAAAATACTAGATGAATAGCAATTTTTTGGCAATAATATCTTGGTGCATAACTGC                                       |
| (P628)_Mja-KIbA.C3.F     | GAGGAGAAAATACTAGATGAATCACACCTACATCGCAGGTAAGAACGAGGGCTTCGC                                          |
| (P633)_RBS30.F           | TACTAGAGATTAAGAGGAGAAAATACTAGATG                                                                   |
| (P634)_RBS32.F           | TACTAGAGTACACAGGAAAGTACTAGATG                                                                      |
| (P653)_PBAD30.R          | CATCTAGTATTTCTCCTCTTAATCTCTAGTAATGGAGAAACAGTAGAGAGTTGGC                                            |
| (P712)_32-SspGyrB.C2.F   | TACTAGAGTACACAGGAAAGTACTAGATGGAAGCAG                                                               |
| (P764)_P(rhaB)-32.R      | ACTTTCTGTGTGACTCTAGTATACGACCAGTCTAAAAAGCGCCTCAATTCCG                                               |
| (P765)_SspGyrB.N.Fil     | GGCAGGTGGTGTGTTTTCTGGAGATACATTAGTCG                                                                |
| (P766)_ECF16.SspGyrB.R   | TCCAGAAAAACAACCCTGCCAGCAGATCATGACG                                                                 |
| (P767)_SspGyrB.C.Ril     | TTTTGCACTGTATGGACAAACACTCCGCTTCG                                                                   |
| (P768)_SspGyrB.ECF16.F   | TTTGTCCATAACAGTGCAAAATTTGCAGCAAGTGTGAACAGC                                                         |
| (P769)_NrdJ-1.N.Fil      | AATCCGTGTTGTCTGGTGGTAGCAGC                                                                         |
| (P770)_ECF17.NrdJ.R      | ACCAACCAGACAACACGGATTATCGGTGCTACCAACAACATTACG                                                      |
| (P771)_NrdJ-1.C.Ril      | GATCTCTGAATATGCAACAGAAATATCATTTGG                                                                  |
| (P772)_NrdJ-1.ECF17.F    | CTGGTGCATAATTCAGAGATCCAGAGCACACCCGGATG                                                             |
| (P773)_ECF17.R           | CCGCTACTAGTATTATTAAACGGGTAACACCCAGTCTTTCG                                                          |
| (P774)_M86.N2-T.R        | CCCTTTCGGGAGGCCCTTTTTCTGGAATTTGGTACCAGCTCTAGTATTATTATTCTAGTTTACGGGTAGAGCAATATGCTCTTTTAAAGATAGC     |
| (P775)_T-P(BAD).F        | AAAGAGGCCCTCCCGAAAGGGGGGCTTTTTCTGTTTTGGTCTACTAGAGGCTATGCCATAGCATTTTTTATCCATAAGATTAGCGGATCTTACC     |
| (P776)_P(BAD)-32.R       | ACTTTCTGTGTGACTCTAGTAATGGAGAAACAGTAGAGAGTTGCGATAAAAAAGCGTACGGTAGGATCCGCTAATCTTATGG                 |
| (P777)_NrdJ-1.N2-T.R     | ACTGTGACGGTGGGGCTTTTTCTGTGTTTCTCTCTAGTATTATAAATGCAACACCAGTTCATCATCATCG                             |
| (P778)_T-P(rha).F        | AAAAGCCCGCACCTGACAGTCCGGGCTTTTTTTTTCGACCAAAGGTACTAGAGGACCTTTACGCCGTGGAGCAGG                        |
| (P779)_ECF20.R           | CCGCTACTAGTATTATTACGGTTTGCAGCAGCCGCTCAGATCTGC                                                      |
| (P780)_SspGyrB.N2-T.R    | CCCTTTCGGGAGGCCCTTTTTCTGGAATTTGGTACCAGCTCTAGTATTATTACGCATGACCAGAATCTCCGTAGTCCG                     |
| (P781)_T-P(lux2).F       | AAAGAGGCCCTCCCGAAAGGGGGGCTTTTTCTGTTTTGGTCTACTAGAGACCTGTAGGATCGTACAGGTTTACGCAAGAAAATGGTTTGTACTTTTCG |
| (P782)_P(lux2)-33.R      | TAGTCTGTGTGACTCTAGTATTATTATCGAAGTAACAACCAATTTTTCTTTCG                                              |
| (P783)_33-ECF16.F        | TACTAGAGTACACAGGACTACTAGATGCAGCGTACC                                                               |
| (P783)_33-ECF16.F        | TACTAGAGTACACAGGACTACTAGATGCAGCGTACC                                                               |
| (P784)_3T5-P16.R         | TTGCATCGGCCCGCCAGGGTTACACCGTCCGGTGGGTTTCTTTTCCATCCAAGCTCTAGAAGCGGCCGCGAATTCG                       |
| (P785)_P16-30-mC.F       | AACCCGTGGCGCGATGCAACGAATAACTTACTAGAGATTAAGAGGAGAAAATACTAGATGGTGGCAAGG                              |
| (P786)_1A3-P17.R         | AGTCGAGTAAGAGTTGGTTCCACAAACGCATCTAAAAAATTTGTACTGCTCTAGAAGCGGCCGCAATTC                              |
| (P787)_P17-30-BFP.F      | AACCAAACTCTACTCGACTCGTGTGAGTATACAGATTAAGAGGAGAAAATACTAGATGAGCGAACTGATC                             |
| (P800)_32-Cth-Ter.C.F    | TACTAGAGTACACAGGAAAGTACTAGATGTCTCACTTCCACTACATAAAGTCTATTGAAAAAAC                                   |
| (P802)_33-NrdJ-1.F       | TACTAGAGTACACAGGACTACTAGATGGAAGCCAAACCTATATCGGCAAACTGAAAAGC                                        |



|                            |                                                                                                             |
|----------------------------|-------------------------------------------------------------------------------------------------------------|
| (P802)_33-NrdJ-1.F         | TACTAGAGTCACACAGGACTACTAGATGGAAGCCAAAACCTATATCGGCAAACCTGAAAAGC                                              |
| (P804)_T-P(lux2)-33.R      | TAGTCTGTGTGACTCTAGTATTTTATTCGAAAGTAAACAAACCTTTTCTTGCCTAAACCTGTACGATCCTACAGGTCTCTAGTAGG<br>ACCAAAACGAAAAAAGG |
| (P807)_imC.F               | GTTTCTTCGAATTCGCGGGCGCTTCTAGAGTTATTAGTGGTGATGGTGATGATGC                                                     |
| (P808)_imC.R               | GTTTCTTCTGCAGCGGCGCTACTAGTACTTGGATGAAAAGAAACCCACCGACG                                                       |
| (P809)_3R-rep.F            | GCTTCTAGAGCCAGGCATCAAATAAAACGAAAGGCTCAGTCG                                                                  |
| (P810)_3R-rep.R            | TCTAGAAGCGGCGGAATCCAGAAATCATCC                                                                              |
| (P1360)_e16-SGyrB.N(C-A).F | GCAGGTGGTGCATTTTCTGGAGATACATTAGTCGCTTAACTGATGG                                                              |
| (P1361)_e16-SGyrB.N(C-A).R | AGAAAATGCACCACCTGCCAGCAGATCATGACG                                                                           |
| (P1362)_SGyrB.C(N-A)-e16.F | TTTGTCCATGCAAGTGCAAAATTTGCAGCAAGTATGAAACAGC                                                                 |
| (P1363)_SGyrB.C(N-A)-e16.R | TTTTGCATTCGATGGACAAACACTCCGCTTGC                                                                            |
| (P1364)_e17-NrdJ.N(C-A).F  | CCGTGTGCACTGGTTGGTAGCAGCGAAATCATTTACC                                                                       |
| (P1365)_e17-NrdJ.N(C-A).R  | ACCAACCAGTGCACACGGATTATCGGTGCTACCAACAACATTACG                                                               |
| (P1366)_NrdJ.C(N-A)-e17.F  | GTGCATGCATCAGAGATCCAGAGCACACC                                                                               |
| (P1367)_NrdJ.C(N-A)-e17.R  | GATCTCTGATGCATGCACCAGAATATCATTTGG                                                                           |
| (P1368)_e20-M86.C(C-A).F   | GTGGATGCTGCAATCTCGGGAGATAGTTTGTATCAGCTTGG                                                                   |
| (P1369)_e20-M86.C(C-A).R   | CGAGATTGCAGCATCCACTTACAGGCATGTTCCG                                                                          |
| (P1370)_M86.C(N-A)-e20.F   | GTACATGCAAGCGATCTGACCCCGTCC                                                                                 |
| (P1371)_M86.C(N-A)-e20.R   | CAGATCGCTTGCATGTACAATGATGTCTATTGGCGAC                                                                       |
| ECF17_1691_fwd             | CGTCTAGAGATTAAGAGGAGAAATACTAGATGGCACGTGTTAGCGGTG                                                            |
| P16_3622_fwd               | AATTCGCGGCGCTTCTAGAGCTTGGATGAAAAGAAACCCACCGACGGTGAACCTGGCGGCCGATGCAACGAACTAACTTA                            |
| P16_3622_rev               | CTAGTAAGTTAGTTTCGTTGATCGGCCCGCAGGGTTACACCGTCCGTTGGGTTTCTTTTCATCCAAGCTCTAGAAGCGGCCGCG                        |
| P17_up1691_fwd             | AATTCGCGGCGCTTCTAGAGCAGTACAAAATTTTATGATGCGTTTGGTGAACCAAACTTTACTCGACTCGTGTGAGTATA                            |
| P17_up1691_rev             | CTAGTACTGACACGAGTGCAGTAAGAGTTTGGTTCACCAAAACGCATCTAAAAAATTTTGTACTGCTTAGAAGCGGCCGCG                           |
| P20_992_fwd                | AATTCGCGGCGCTTCTAGAGCGCGGATAAAAATTTTATTTGCCCGCAGCGATTCCCGCCCATCTATCGTTGAACCCATA                             |
| P20_992_rev                | CTAGTATGGGTTCAACGATAGATGGCGGGGAATCCGTCGCGGCAATGAAATTTTATCCGCGCTCTAGAAGCGGCCGCG                              |
| (EP49)_Blunt_SasG3_F       | ACCATTACAGAGCTGGAGAAGAAGTTGAG                                                                               |
| (EP50)_Blunt_SasG3_R       | CGGACCATACTCGGTGAGCTCGTTAATCCG                                                                              |
| (EP51)_Gp41-1_C_F          | TAATATTAAGAGGAGAAATACTAGATGCTGAAAAAATCTGAAAAATCGAGGAA                                                       |
| (EP52)_Gp41-1_C_R          | CCTTCTTCTCCAGCTCTGTAATGGTACTGCTAGAAATATGGGTGAGAATATCATT                                                     |
| (EP53)_Gp41-1_N_F          | TAACGAGCTCACCGAGTATGGTCCGTCAGGACTGCTGATCTGAAAAACCCAG                                                        |
| (EP54)_Gp41-1_N_R          | AGCAGCCGGATCCGGTACCTCCTTATTTTAAACATACAGGCACATACCTTCTTT                                                      |
| (EP55)_IMPDH_C_F           | TAATATTAAGAGGAGAAATACTAGATGACAGATGTAACGATTAAAAAATTCAAA                                                      |
| (EP56)_IMPDH_C_R           | CCTTCTTCTCCAGCTCTGTAATGGTGCATATCGAAATATGAACAACGGTGCCACG                                                     |
| (EP57)_IMPDH_N_F           | TAACGAGCTCACCGAGTATGGTCCGGTGGAGTTGTTTTGTTCCGGGTACACTG                                                       |
| (EP58)_IMPDH_N_R           | AGCAGCCGGATCCGGTACCTCCTTAAATTCAGCTCGATCAGCAGATGTTTTTTCAT                                                    |
| (P729)_RBS30_gp41-8.C.F    | ATTAAGAGGAGAAATACTAGATGTGTGAAATCTTTGAAAACGAGATCG                                                            |
| (P730)_gp41-8.C.SasG       | CCTTCTTCTCCAGCTCTGTAATGGTAAACCCACTATTATGGGTGAGAATACCATTGG                                                   |
| (P727)_SasG_gp41_8.N.F     | TTAACGAGCTCACCGAGTATGGTCCGTTGAACAGGTGCTGAGCCTGGATACCATTGG                                                   |
| (P728)_gp41-1.N_pET11.R    | TTAGCAGCCGGATCCGGTACCTCCTTATTTTGCACGGCTAGCAGAAAAATCGCCAC                                                    |
| (EP63)_Nrdj-1_C_F          | TAATATTAAGAGGAGAAATACTAGATGGAAGCCAAAACCTATATCGGCAAACCTG                                                     |
| (EP64)_Nrdj-1_C_R          | CCTTCTTCTCCAGCTCTGTAATGGTATCTCTGAATATGACACCAGAATATCATT                                                      |
| (EP65)_Nrdj-1_N_F          | TAACGAGCTCACCGAGTATGGTCCGAATCCGTTGTTCTGTTGGTAGCAGCGAA                                                       |
| (EP66)_Nrdj-1_N_R          | AGCAGCCGGATCCGGTACCTCCTTAAATTCGAACACCAGTTTCATCATCATCCGGT                                                    |
| (EP67)_pET11_F             | TAAGGAGTACCGGATCCGGTCTGTAACAAAGC                                                                            |
| (EP68)_PET11_RBS30_R       | CTAGTATTTCTCCTCTTAAATATTTTCTAGAGGGGAATTGTTATCCGCT                                                           |
| (EP69)_SasG3_His_R         | AGCAGCCGGATCCGGTACCTCCTTAGTGGTATGGTATGATGCGGACCATACTCGGTGAGCTCGTTAATCCGG                                    |
| (EP70)_SasG3_Strep_F       | TAATATTAAGAGGAGAAATACTAGATGTGGTCTCATCCTCAATTTGAAAAAACCATACAGAGCTGGAGAAGAAGTTGAG                             |
| (EP71)_SspGyrB_C_F         | TAATATTAAGAGGAGAAATACTAGATGGAAGCAGTATTAATTAACAATCACAGA                                                      |
| (EP72)_SspGyrB_C_R         | CCTTCTTCTCCAGCTCTGTAATGGTTTTTGCACCTGTTATGGACAAACACTCCGCT                                                    |
| (EP73)_SspGyrB_N_F         | TAACGAGCTCACCGAGTATGGTCCGGCAGGTGGTGTGTTTTCTGGAGATACATTA                                                     |
| (EP74)_SspGyrB_N_R         | AGCAGCCGGATCCGGTACCTCCTTACGCATGACCAGAATCTTCCGTAGTCGAAAT                                                     |
| S3_1_GSG_inlinker          | CTCCAGCTCTGTAATGGTGCAGCTGCCGCTTTTTTCAAATGAGGATGAGACCAC                                                      |
| (EP93)_S3_1_F              | ATATTAAGAGGAGAAATACTAGATGCATCATACCATCACCAACCATTACAGAGCTGGAGAAGAAGG                                          |
| (EP94)_S3_1_R              | ATCTCTGAACACGGATCCGGACCATACTCGGTGAG                                                                         |
| (EP95)_S3_2_F              | ATCCGTTTCAGAGATCACCATACAGAGCTGGAGAAGAAGG                                                                    |
| (EP96)_S3_2_R              | TACTGCTAGAGTATCCTGACGGACCATACTCGGTGAGCT                                                                     |
| (EP97)_S3_3_F              | GTCAGGATACTCTAGCAGTACCATTACAGAGCTGGAGAAGAAGG                                                                |
| (EP98)_S3_3_R              | CATATCGAACTCCACCCGGACCATACTCGGTGAGCT                                                                        |
| (EP99)_S3_4_F              | GTGGAGGTTGATATGCACCATACAGAGCTGGAGAAGAAGG                                                                    |
| (EP104)_S3_6_R             | TCCGGTACCTCCTTACGGACCATACTCGGTGAGCT                                                                         |
| (EP108)_S3_J1_SeqF         | AATCCGTGTTTCAGAGATC                                                                                         |
| (EP109)_S3_J2_SeqF         | TCAGGATACTCTAGCAGT                                                                                          |
| (EP110)_S3_J3_SeqF         | GGTGGAGGTTTCGATATGC                                                                                         |
| (EP111)_S3_J4_SeqF         | GCAGGTGGTAGTCAAAA                                                                                           |
| (EP112)_S3_J5_SeqF         | TCAAACCTTTGCAATGAG                                                                                          |

**Supplementary Table 6 | Regulatory parts and reporters used in this study**

| Part name                                   | Part type                        | Sequence <sup>a</sup>                                                                                                                                                                                                                                                                                                                                                                                                                                                                                                                                                                                                                                                                                                                                                                                                                                                                                                                                                                                                                                                                                                                                                                                                                                                                                                | Source |
|---------------------------------------------|----------------------------------|----------------------------------------------------------------------------------------------------------------------------------------------------------------------------------------------------------------------------------------------------------------------------------------------------------------------------------------------------------------------------------------------------------------------------------------------------------------------------------------------------------------------------------------------------------------------------------------------------------------------------------------------------------------------------------------------------------------------------------------------------------------------------------------------------------------------------------------------------------------------------------------------------------------------------------------------------------------------------------------------------------------------------------------------------------------------------------------------------------------------------------------------------------------------------------------------------------------------------------------------------------------------------------------------------------------------|--------|
| [ <i>araC</i> /P <sub><i>araBAD</i></sub> ] | Regulator/<br>Inducible promoter | TTATGACAACCTTGACGGCTACATCATTCACTTTTCTTCCACAACCGGCACGGAACCTCGCTCGGGCTGGCCCCGG<br>TGCATTTTTTAAATACCCGCGAGAAATAGAGTTGATCGTCAAACCAACATTCGCGACCGACGGTGGCGATAGGC<br>ATCCGGTGGTGCCTAAAAGCAGCTTCGCCCTGGCTGATACGTTGGTCTCGCGCCAGCTTAAAGCAGCTAAATCC<br>TAAGTCTGGCGGAAAGATGTGACAGACCGGACGGGCAAGCAACATGCTGTGGACGCTGCCGATATCAA<br>AATTGCTGTGCGCAGGTGATCGCTGATGACTGACAAGCCTCGCGTACCCGATTATCCATCGGTGGATGGAGC<br>GACTCGTTAATCGCTTCCATGCGCGCAGTAAACAATTGCTCAAGCAGATTATCGCCAGCAGCTCCGAATAGCG<br>CCCTTCCCTTGGCCGGGTTAATGATTTGCCCAAACAGGTGCTGAAATGCGGCTGGTGGCTTCATCCGGGC<br>GAAAGAACCCTGATTGGCAAATATTGACGGCCAGTTAAGCCATTTCATGCCAGTAGGCGCGGAGCAAAGTAA<br>ACCCACTGGTGTATACCATTCGCGAGCCTCCGGATGACGACCGTAGTGATGAATCTCTCCTGGCGGGAACAGCAA<br>AATATACCCGGTGGGCAAAACAATTCTCGTCCCTGATTTTACCACCCCTGACCGGAAATGGTGAAGATTGA<br>GAATATAACCTTTTCATCCAGCGGTCGGTCGATAAAAAATCGAGATAACCGTTGGCCCTCAATCGCGTTAAA<br>CCCGCCACAGATGGGCATTAAACAGTATCCCGGCAGCAGGGGATCATTTTGGCTTCAGCCATACCTTTTCAT<br>ACTCCCGCATTCAGAGAAGAAACCAATTGTCATATTGCATCAGACATTGCGCTCACTGGCTCTTTTACTGGC<br>TCTTCTCGCTAACCAAACCGGTAACCCCGCTTATAAAAAGCATTTCTGTAACAAGCGGGA <b>C</b> CAAAGCCAT <b>GACA</b><br><b>AAAACCGCTAACAAAAGTGTCTAATACAGCGCAGAAAAGTCCACATTTGATTTATTTGACCGGCTCACACTTTG</b><br><b>CTATGCCATAGCATTTTATCCATAAGATTAGCGGATCCTACTGACGCTTTTATCGCAACTCTCTACTGTTT</b><br><b>CTCCAT</b> | 18     |
| [ <i>rhaS</i> /P <sub><i>rhaBAD</i></sub> ] | Regulator/<br>Inducible promoter | GGACCAAAACGAAAAAGACGCTTTTTCAGCGTCTTATTGTTGCTTTGGTACCAGCTAGTATTATTGCAGAA<br>AGCCATCCCGTCCCTGGCGAATATCACGCGGTGACCAAGTTAAACTCTCGCGCAAAAAGCGTCAAAAAGTGGTTA<br>CTGTGCTGAATCCACAGCGATAGCGATGTCAGTAACGCTGGCTCGCTGGCGTAGCAGATGTCGGGCTTT<br>CATCAGTTCGAGGCGGTTCAAGTATCGCTGAGGCGTCACTCCGCTTGGTCTTAAAGTGGCGATGATAGCGTAC<br>CGAGTAAAGAGAAAAATTGATCCGCCACGGCATCCCAATTCACCTCATCGGCAAAAATGGTCTCCAGCCAGCCG<br>AGAAGCAAGTTGAGAGCTGATGGCTGTTTCCAGGTTCTCCTGCAAACTGCTTTTACGCAAGAGCACTAA<br>TTGCATAAACCAAGATCTCGCGACTGGCGGTGAGGGTAAATCATTTTCCCTTCTCCTGCTTCCATCTGTGCAA<br>CCAGCTGTGCACTGCTGCAATACCGTGTGGTTAAACGCGCCAGTGAAGCGGATACGCGCATCCAGCTCTTGT<br>GGCAGCAACTGATTCAGCCCGGCGAGAACTGAAATCGATCCGGCGAGCGATACAGCACATTGGTGCAGACAG<br>ATTATCGGTATGTTTACACAGATGCCGATCATGATCGCGTACGAAACAGACCGTCCACCGGTGATGGTATAGG<br>GCTGCCCATTAACACATGAATACCGTGGCATGTTGCAAAATCACAAATTCATGAAAATCATGATGATGTTCA<br>GGAAAATCCGCTGGCGGAGCCGGGTTCTATCGCCACGGACGCGTTACCGGACGAAAAAATCCACACTATG<br>TAATACGGTCACTTTGGGCTCCCTAGTAGCTAGCATAATACCTAGGACTGAGCTAGCTGTA <b>AA</b> CTCTAGTATC<br>ACACTGGCTCACCTTCGGGTGGGCTTTCTGCGTTTATATACTAGAGAGACCTTTACCGCCCTGGAGCGAAAT<br>GCGGTGAGCATCACAT <b>CACCACAATTGACGAAATTTGAAACATCATCAGTTTCATCTTTCCCTGGTGGCCAAATG</b><br><b>GCCCATTTTCTGTGAGTAAAGGTCGCAATTTGAGGCGCTTTTATAGACTGGTCTGA</b>                                              | 19     |
| [ <i>luxR</i> /P <sub><i>luxZ</i></sub> ]   | Regulator/<br>Inducible promoter | TTTATAGCTAGCTCAGCCCTTGGTACAATGCTAGCTACTAGAGATTAAAGAGGAGAAATACTAGATGAAAAACA<br>TAAATGCCGACGACACATACAGAAATAATTAATAAAATTAAGCTTTGAGAGCAATAATGATATTAATCAATGC<br>TTATCTGATATGACTAAAATGGTACATTTGTGAATATATTTACTCGCGATCATTTATCCTCATTTCTATGGTTAA<br>ATCTGATATTTCAATCCTAGATAATTACCCTAAAAAATGGAGGCAATATTATGATGACGCTAAATTTAATAAAAT<br>ATGATCCTATAGTAGATTAATTCACCTCAATCATCCCAATTAATGGAAATATAATTTGAAAAAATGCTGTA<br>AATAAAAAATCTCCAATGTAATTAAGAAGCGAAAAACATCAGTCTTATCACCTGGGTTTAGTTTCCCTATTCTA<br>TAGGGCTAACCAATGGCTTCGGAATGCTTAGTTTGGCACATTCAGAAAAAGACAATATATAGATAGTTTATTTT<br>TACATGCGGTGATGAACATACCAATTAATGTTCCCTTCTAGTTGATAAATATCGAAAAAATAATATAGCAAT<br>AATAAATCAAACAACGATTTAACCAAAAGAGAAAAAAGATGTTAGCGTGGCGATCGCAAGGAAAAAGCTCTTG<br>GGATATTTCAAATAATTAGTTGTCAGTGAAGCTACTGTCACCTTTCCATTTAAACCAATGGCAAAATGAAACTCA<br>ATACAACAAACCGCTGCCAAAGTATTTCTAAAGCAATTTAACAGGAGCAATGATTTGCCAATCTTTAAAAAT<br>TAATAACACTGATAGTGTAGTGTAGATCACTAGAGCCAGGCATCAAATAAACAGGCTCAGTCTGCAAA<br>GACTGGGCTTTGCTTTTATCTGTTGTTGTCGGTGAACGCTCTCTACTAGAGTACACTGGCTCACCTTCGGG<br>TGGGCTTTTCTGCGTTTATA <b>TACTAGAGACCTGTAGGATCGTACAGGTTTACGCAAGAAAATGGTTTGTACTT</b><br><b>TCGAATAAA</b>                                                                                                                                                                         | 20     |
| P <sub>16_3622</sub>                        | Inducible promoter               | <b>CTTGGATGAAAAGAAACCCACCAGCGTGAACCCCTGGCGCGGATGCAACGAACTAACT</b>                                                                                                                                                                                                                                                                                                                                                                                                                                                                                                                                                                                                                                                                                                                                                                                                                                                                                                                                                                                                                                                                                                                                                                                                                                                    | 21     |
| P <sub>17_Up1691</sub>                      | Inducible promoter               | <b>CAGTACAAAATTTTTTAGATGCGTTTGGTGAACCAACTCTTACTCGACTCGTGTAGTA</b>                                                                                                                                                                                                                                                                                                                                                                                                                                                                                                                                                                                                                                                                                                                                                                                                                                                                                                                                                                                                                                                                                                                                                                                                                                                    | 21     |
| P <sub>20_992</sub>                         | Inducible promoter               | <b>GCGCGGATAAAAATTTTCATTTGCCCGCAGCGGATTCGCCGCCATCTATCGTTGAACCCA</b>                                                                                                                                                                                                                                                                                                                                                                                                                                                                                                                                                                                                                                                                                                                                                                                                                                                                                                                                                                                                                                                                                                                                                                                                                                                  | 21     |
| <i>ecf16_3622</i>                           | Regulator                        | ATGCAGCGTACCAATAGCCAGGATGTTCTGAGCACCCGTAAGGCCAGCTGCAGGCATTACTGCTGCAGGGTCT<br>GGCAGCGATACCTTTGCATATCGTCACTTCTGACCGCACTGGCAGCACATATTCGTGGTTTTCTGCTGCTGCT<br>GTCTGCCGACGATCCGGCAGAAGTTGAAGATCTGCTGCAAGAAGTTCTGCTGGCAGTTCATAATGCACGTCAT<br>ACGATACAGGCAGCTCAGCCGCTGACCGCATGGGTTGAGCAATTCACGCTTATAAATGGCAGATCATCTGCG<br>TAGCCATGCAGTTCGTTGAAGCAGTCACTGCTGCTGGATGATGATAGCGAACTGTTTGCAGCAAGTATGAAC<br>AGCCTGCACAGGCAAGCCGTGATCTGGGTAACCTGCTGGGTCAGCTGCCGATCGTCAGCGTCTGCCGATTGTT<br>CATGTTAAACTGGAAGGCTGAGCGTTGAAGAAACCCACAGATTACCGGCTGAGCAGCAGCCAGTTAAAGT<br>TGGTATTCATCGTGGTCTGAAAGCACTGGGCAAACTGATTCGTGGTAAAGGTCATGATGAAGATCGTTAA                                                                                                                                                                                                                                                                                                                                                                                                                                                                                                                                                                                                                                                                                         | 21     |
| <i>ecf17_1691</i>                           | Regulator                        | ATGGCACGTGTTAGCGGTGACGAGCAGCCGAAGCAGCACTGATGCGTGCAGTGTATGATGAACATGCAGCAGT<br>TCTGTGGCGTTATGCACTGCGTCTGACCGGTGATGACGACAGGCAAGATGTTGTTCAAGAAACCTGCTGCTG<br>GTGATGGCAGCATCCGGAAGTTATTGGTATACCGCAGCTCCGGCAGCGCATGGCTGTTTACCGTTGCACGT<br>AATATGATTTGATGAACGTCGTAGCGCACGTTTTCGTAATGTTGTTGGTAGCACCGATCAGAGCGGTACACC<br>GGAACAGAGCACACCGGATGAAGTTAATGCAGCACTGGATCGTCTGCTGATTTGCAGATGCACCTGGCAGCTGA<br>GCGCAGAACATCGTGCAGTTATTCAGCGTAGCTATTATCGTGGTTGGAGCACCGCACAGATTGCAACCGATCTG<br>GGTATTGCAAGGACCGTTAAAGCCGCTGTCATTTATGACGTTCTGCTGCCCTGCGCTGACCTGCAAGAACT<br>GGTGTACCCTGTTAA                                                                                                                                                                                                                                                                                                                                                                                                                                                                                                                                                                                                                                                                                                                                               | 21     |
| <i>ecf20_992</i>                            | Regulator                        | ATGAATGAAACCGATCTGATCTGGAACCTGCTGAAACGTAATGGTAATAATGATGCACAGGCGGTTAAAGAAAT<br>GGTTACCCGTAACCTGCTGCTGCTGGCACTGGCAAGTCCCTGCTGGTGTGATGCAGATGAAGCAGCTGATA<br>TTGCACAAGAAAGTTTTCTGCGCATTTGGAACAGGCAAGCAAGCTGGCGTAGCGAAACAGGACAGCTTTGATACC<br>TGCGTGCATCGTGTGCACTGAATCTGTGTTATGATCGTCTGCTGCTGCTGCTGCTGCTGCTGCTGCTGCTGCTG<br>CGAACATGCTGTGAAGCAGTGGATACCCGTCGCCACCGGATGAACAGCTGGAAGCAAGCGCACAGAGCCGCTC<br>GTATGGCACAGGCACTGGATCAGTGGCGGATCGTCAAGCAAGTGGTCTGCGATTTATCAAGAAGT<br>AGCAAATACGAAAGCAGCAGCACTGATGCAAAATAGCGTTGAAGCCCTGGAAGCCCTGCTGAGCGCTGACAGCTG<br>TAATCTGCTAGCCATCTGGCCGAGCAGCCGGTGCAGATCTGAGCGGCTGCTGCAAAACCGTAA                                                                                                                                                                                                                                                                                                                                                                                                                                                                                                                                                                                                                                                                                               | 21     |

|                |            |                                                                                                                                                                                                                                                                                                                                                                                                                                                                                                                                                                                                                                                                                                                                                                        |    |
|----------------|------------|------------------------------------------------------------------------------------------------------------------------------------------------------------------------------------------------------------------------------------------------------------------------------------------------------------------------------------------------------------------------------------------------------------------------------------------------------------------------------------------------------------------------------------------------------------------------------------------------------------------------------------------------------------------------------------------------------------------------------------------------------------------------|----|
| B0030          | RBS        | ATTAAGAGGAGAAA                                                                                                                                                                                                                                                                                                                                                                                                                                                                                                                                                                                                                                                                                                                                                         | 18 |
| B0032          | RBS        | TCACACAGGAAA                                                                                                                                                                                                                                                                                                                                                                                                                                                                                                                                                                                                                                                                                                                                                           | 18 |
| B0033          | RBS        | TCACACAGGAC                                                                                                                                                                                                                                                                                                                                                                                                                                                                                                                                                                                                                                                                                                                                                            | 18 |
| B0015          | Terminator | CCAGGCATCAAATAAAACGAAAGGCTCAGTCGAAAGACTGGGCCTTTCGTTTTATCTGTTGTTTGTGCGGTGAAC<br>GCTCTCTACTAGAGTCACACTGGCTCACCTTCGGTGGGCCTTTCGCGTTTATA                                                                                                                                                                                                                                                                                                                                                                                                                                                                                                                                                                                                                                   | 18 |
| L3S2P21        | Terminator | CTCGGTACCAAATTCAGAAAAGAGGCTCCCGAAAGGGGGCCTTTTTTCGTTTTGGTCC                                                                                                                                                                                                                                                                                                                                                                                                                                                                                                                                                                                                                                                                                                             | 22 |
| ECK120033737   | Terminator | GGAAACACAGAAAAGCCCGCACCTGACAGTGC GGCTTTTTTTTTTCGACCAAAGG                                                                                                                                                                                                                                                                                                                                                                                                                                                                                                                                                                                                                                                                                                               | 22 |
| <i>mCherry</i> | Reporter   | ATGGTGAGCAAGGGCGAAGAAGACAACATGGCCATCATCAAGGAGTTCATGCGCTTCAAGTGCACATGGAGGG<br>CTCCGTGAACGGCCACGAGTTCGAGATCGAGGGCGAGGGCGAGGGCCGCCCTACGAGGGCACCCAGACCGCCA<br>AGCTGAAGGTGACCAAGGGTGGCCCTTCGCCCTTCGCGCTGGGACATCCTGTCCCTCAGTTCATGTACGGCTCC<br>AAGGCCCTACGTGAAGCACCCTCCGACATCCCCGACTACTTGAAGCTGTCCTTCCCGAGGGCTTCAAGTGGGA<br>GCGCGTGATGAACTTCGAGGACGGCGCGTGGTGACCGTGACCCAGGACTCCTCCTTGCAGGACGGCGAGTTC<br>TCTACAGGTGAAGCTGCGCGCACCAACTTCCCTCCGACGGCCCGTAAATGCAGAAAGAGCCATGGGCTGG<br>GAGGCTCCTCCGAGCGGATGTACCCGAGGACGGCGCCCTGAAGGGCGAGATCAAGCAGAGGCTGAAGCTGAA<br>GGACGGCGGCCACTACGACGCTGAGGTCAAGACCCTACAAGCCAAAGAGCCCGTGCAGCTGCCCGGCCCT<br>ACAACGTCAACATCAAGTTGGACATCACCTCCACAACGAGGACTACACCATCGTGAACAGTACGAACGGCGCC<br>GAGGGCCGCCACTCCACGGCGCATGGACGAGCTGTACAAGTAA              | 18 |
| <i>bfp</i>     | Reporter   | ATGAGCGAAGTGCATCAAGAGAACATGCACATGAAGCTGTACATGGAAGGCACCGTTGACAACCACACTTTAA<br>GTGCACGCTGAGGGTGAGGTAAGCCGTACGAAGGCACCAACCATGCGTATCAAAGTTGTGGAGGGCGGTC<br>CACTGCCGTTTCGCTTTTGACATTTCTGGCGACAGCTTCCTGTACGGTCCAAAACGTTCAATTAACCATACTCAG<br>GGCATTCGGATTTCTTCAAACAGAGCTTTCGGGAAGTTTCACTGGGAGCGTGTACCACGATGAAGATGG<br>TGGTGTGTTGACCGCCACCAAGATACCTCCCTGCAAGATGGCTGTCTGATCTATAACGTGAAAATTCGTGGCG<br>TCAACTTTACGAGCAATGGTCCGGTGTGCAGAAAGAAACCTGGGTGGGAGGCGTTTACGGAACCCCTGTAT<br>CCGCCGATGGTGGCTGGAGGGCCGTAACGACATGGCACTGAAGCTGGTTGGTGGCAGCCATTTGATCGCAAA<br>TATCAAGACGACGTACCAGCAAGAAACCGGGCAAAAATCTGAAGATGCCGGGTGTTACTATGTCGACTACC<br>GTCTGGAACGCATTAAGAAGCGAATAATGAGACTTACGTGGAGCAGCAGGTTGCAGTCCGCGCTATTGC<br>GACTTGCTTAGCAAGCTGGGTCAATAACTGAATTA                             | 18 |
| <i>gfp</i>     | Reporter   | ATGCGTAAAGGAGAAGAACTTTTCACTGGAGTTGTCCCAATTCCTGTGAATTAGATGGTGTATGTTAATGGGCA<br>CAAATTTCTGTCAGTGGAGGGTGAAGGTGATGCAACATACGAAAACCTTACCCTTAAATTTATTTGCACTA<br>CTGGAAAACCTACCTGTTCCATGGCCAACTTGTCACTACTTTTCGGTTATGGTGTCAATGCTTTGCGAGATAC<br>CCAGATCATATGAAAACAGCATGACTTTTCAAGAGTGCCATGCCCGAAGTTATGTACAGGAAAAGAACTATATT<br>TTTCAAAGATGACGGGAACACAAAGACACGTGCTGAAGTCAAGTTTGAAGTGTATACCCTTGTTAATAGAATCG<br>AGTTAAAGGTATTGATTTTAAAGAAGATGAAAACATTCCTGGACACAAATGGAATACAACATAACTCACAC<br>AATGTATACATCATGGCAGACAAAACAAAAGAAATGGAATCAAAGTTAACTTCAAATTAGACACAACTTGAAGA<br>TGAAGCGTTCAACTAGCAGACCATTTCAACAAAATACTCCAATTGGCGATGGCCCTGTCTTTTACCAGACA<br>ACCATTACCTGTCCACACAATCTGCCCTTTCGAAAGATCCCAACGAAAAGAGAGACCACATGGTCTCTTTGAG<br>TTTGTAAACAGCTGCTGGGATTACACATGGCATGGATGAACATATAAAATA | 20 |

<sup>a</sup> DNA sequence colors correspond to promoters (orange), RBSs (green), protein coding sequences (blue), and terminators (purple), and spacers (black).

**Supplementary Table 7 | List of the plasmids used in this study**

| <b>Name</b>                          | <b>Description</b>                                                                         | <b>Backbone</b> | <b>Origin</b> | <b>Resistance<sup>a</sup></b> | <b>Source</b>   |
|--------------------------------------|--------------------------------------------------------------------------------------------|-----------------|---------------|-------------------------------|-----------------|
| pSB3T5                               | BioBrick vector                                                                            | pSB3T5          | p15A          | Tet                           | <sup>18</sup>   |
| pSB1A3                               | BioBrick vector                                                                            | pSB1A3          | pMB1          | Amp                           | <sup>18</sup>   |
| pSB4A3                               | BioBrick vector                                                                            | pSB4A3          | pSC101        | Amp                           | <sup>18</sup>   |
| pSB3K3                               | BioBrick vector                                                                            | pSB3K3          | p15A          | Kan                           | <sup>18</sup>   |
| pSEVA221                             | SEVA vector                                                                                | pSEVA221        | RK2           | Kan                           | <sup>23</sup>   |
| pET-HT                               | Expression vector (pET11-derived)                                                          | pET-HT          | pBR322        | Amp                           | <sup>b</sup>    |
| pSB1C3-BBa_I0500                     | Plasmid containing the arabinose-inducible promoter and regulator                          | pSB1C3          | pMB1          | Chl                           | <sup>18</sup>   |
| pUpR-sfGFP                           | Plasmid containing the rhamnose-inducible promoter and regulator                           | pSB1K3          | pMB1          | Kan                           | <sup>c</sup>    |
| pBW313J115-luxR                      | Plasmid containing the AHL-inducible promoter and regulator and the GFPmut3b encoding gene | pSB3K3          | p15A          | Kan                           | <sup>20</sup>   |
| pSB1C3-BBa_J06504                    | Plasmid containing mCherry encoding gene                                                   | pSB1C3          | pMB1          | Chl                           | <sup>18</sup>   |
| pSB1C3-BBa_K592026                   | Plasmid containing mTagBFP encoding gene                                                   | pSB1C3          | pMB1          | Chl                           | <sup>18</sup>   |
| pVRa-ECF16_3622                      | Plasmid containing the ECF16_3622 encoding gene                                            | pVRa            | pBR322        | Amp                           | <sup>21</sup>   |
| pVRa-ECF17_1691                      | Plasmid containing the ECF17_1691 encoding gene                                            | pVRa            | pBR322        | Amp                           | <sup>21</sup>   |
| pVRa-ECF20_992                       | Plasmid containing the ECF20_992 encoding gene                                             | pVRa            | pBR322        | Amp                           | <sup>21</sup>   |
| pSasG5 <sup>1</sup> -G5 <sup>3</sup> | Plasmid containing the SasG5 <sup>3</sup> E <sup>2</sup> encoding gene                     | pET-YSBLIC      | pBR322        | Kan                           | <sup>24,d</sup> |

<sup>a</sup> Tet - Tetracycline; Amp - Ampicillin; Kan - Kanamycin; Chl - Chloramphenicol

<sup>b</sup> Kindly provided by Prof. Lynne Regan

<sup>c</sup> Kindly provided by Yang Liu

<sup>d</sup> Kindly provided by Prof. Jennifer R. Potts

**Supplementary Table 8 | List and structure of the plasmids constructed in this study**

| Name     | Structure <sup>a</sup>                                                                                                                                  | Backbone | Origin | Resistance <sup>b</sup> |
|----------|---------------------------------------------------------------------------------------------------------------------------------------------------------|----------|--------|-------------------------|
| pFP.R193 | [ <i>araC</i> / <i>P<sub>araBAD</sub></i> ]-B0030- <i>mCherry</i> . <i>H<sub>6</sub></i>                                                                | pSB3T5   | p15A   | Tet                     |
| pFP.R574 | [ <i>araC</i> / <i>P<sub>araBAD</sub></i> ]-B0030- <i>mCherry</i> <sup>N</sup>                                                                          | pSB3T5   | p15A   | Tet                     |
| pFP.R576 | [ <i>araC</i> / <i>P<sub>araBAD</sub></i> ]-B0030- <i>mCherry</i> <sup>C</sup> . <i>H<sub>6</sub></i>                                                   | pSB1A3   | pMB1   | Amp                     |
| pFP.R575 | [ <i>araC</i> / <i>P<sub>araBAD</sub></i> ]-B0030- <i>mCherry</i> <sup>N</sup> (SGY)                                                                    | pSB3T5   | p15A   | Tet                     |
| pFP.R577 | [ <i>araC</i> / <i>P<sub>araBAD</sub></i> ]-B0030-(SSS) <i>mCherry</i> <sup>C</sup> . <i>H<sub>6</sub></i>                                              | pSB1A3   | pMB1   | Amp                     |
| pFP.R222 | [ <i>araC</i> / <i>P<sub>araBAD</sub></i> ]-B0030- <i>mCherry</i> <sup>N</sup> (VDASDL) <i>mCherry</i> <sup>C</sup> . <i>H<sub>6</sub></i>              | pSB3T5   | p15A   | Tet                     |
| pFP.R223 | [ <i>araC</i> / <i>P<sub>araBAD</sub></i> ]-B0030- <i>mCherry</i> <sup>N</sup> (GGKAWN) <i>mCherry</i> <sup>C</sup> . <i>H<sub>6</sub></i>              | pSB3T5   | p15A   | Tet                     |
| pFP.R194 | [ <i>araC</i> / <i>P<sub>araBAD</sub></i> ]-B0030- <i>mCherry</i> <sup>N</sup> (SGYSSS) <i>mCherry</i> <sup>C</sup> . <i>H<sub>6</sub></i>              | pSB3T5   | p15A   | Tet                     |
| pFP.R224 | [ <i>araC</i> / <i>P<sub>araBAD</sub></i> ]-B0030- <i>mCherry</i> <sup>N</sup> (LNRSVA) <i>mCherry</i> <sup>C</sup> . <i>H<sub>6</sub></i>              | pSB3T5   | p15A   | Tet                     |
| pFP.R225 | [ <i>araC</i> / <i>P<sub>araBAD</sub></i> ]-B0030- <i>mCherry</i> <sup>N</sup> (NPCSEI) <i>mCherry</i> <sup>C</sup> . <i>H<sub>6</sub></i>              | pSB3T5   | p15A   | Tet                     |
| pFP.R226 | [ <i>araC</i> / <i>P<sub>araBAD</sub></i> ]-B0030- <i>mCherry</i> <sup>N</sup> (GGGSIC) <i>mCherry</i> <sup>C</sup> . <i>H<sub>6</sub></i>              | pSB3T5   | p15A   | Tet                     |
| pFP.R227 | [ <i>araC</i> / <i>P<sub>araBAD</sub></i> ]-B0030- <i>mCherry</i> <sup>N</sup> (IDECHT) <i>mCherry</i> <sup>C</sup> . <i>H<sub>6</sub></i>              | pSB3T5   | p15A   | Tet                     |
| pFP.R228 | [ <i>araC</i> / <i>P<sub>araBAD</sub></i> ]-B0030- <i>mCherry</i> <sup>N</sup> (AGGSAK) <i>mCherry</i> <sup>C</sup> . <i>H<sub>6</sub></i>              | pSB3T5   | p15A   | Tet                     |
| pFP.R229 | [ <i>araC</i> / <i>P<sub>araBAD</sub></i> ]-B0030- <i>mCherry</i> <sup>N</sup> (IGCSFD) <i>mCherry</i> <sup>C</sup> . <i>H<sub>6</sub></i>              | pSB3T5   | p15A   | Tet                     |
| pFP.R230 | [ <i>araC</i> / <i>P<sub>araBAD</sub></i> ]-B0030- <i>mCherry</i> <sup>N</sup> (GSKTVI) <i>mCherry</i> <sup>C</sup> . <i>H<sub>6</sub></i>              | pSB3T5   | p15A   | Tet                     |
| pFP.R231 | [ <i>araC</i> / <i>P<sub>araBAD</sub></i> ]-B0030- <i>mCherry</i> <sup>N</sup> (SGKTQL) <i>mCherry</i> <sup>C</sup> . <i>H<sub>6</sub></i>              | pSB3T5   | p15A   | Tet                     |
| pFP.R378 | [ <i>araC</i> / <i>P<sub>araBAD</sub></i> ]-B0030- <i>mCherry</i> <sup>N</sup> (VNQSGR) <i>mCherry</i> <sup>C</sup> . <i>H<sub>6</sub></i>              | pSB3T5   | p15A   | Tet                     |
| pFP.R379 | [ <i>araC</i> / <i>P<sub>araBAD</sub></i> ]-B0030- <i>mCherry</i> <sup>N</sup> (DKFSTK) <i>mCherry</i> <sup>C</sup> . <i>H<sub>6</sub></i>              | pSB3T5   | p15A   | Tet                     |
| pFP.R380 | [ <i>araC</i> / <i>P<sub>araBAD</sub></i> ]-B0030- <i>mCherry</i> <sup>N</sup> (GSKCSN) <i>mCherry</i> <sup>C</sup> . <i>H<sub>6</sub></i>              | pSB3T5   | p15A   | Tet                     |
| pFP.R381 | [ <i>araC</i> / <i>P<sub>araBAD</sub></i> ]-B0030- <i>mCherry</i> <sup>N</sup> (SNLCSE) <i>mCherry</i> <sup>C</sup> . <i>H<sub>6</sub></i>              | pSB3T5   | p15A   | Tet                     |
| pFP.R382 | [ <i>araC</i> / <i>P<sub>araBAD</sub></i> ]-B0030- <i>mCherry</i> <sup>N</sup> (KHHSVL) <i>mCherry</i> <sup>C</sup> . <i>H<sub>6</sub></i>              | pSB3T5   | p15A   | Tet                     |
| pFP.R383 | [ <i>araC</i> / <i>P<sub>araBAD</sub></i> ]-B0030- <i>mCherry</i> <sup>N</sup> (HGKSEL) <i>mCherry</i> <sup>C</sup> . <i>H<sub>6</sub></i>              | pSB3T5   | p15A   | Tet                     |
| pFP.R384 | [ <i>araC</i> / <i>P<sub>araBAD</sub></i> ]-B0030- <i>mCherry</i> <sup>N</sup> (ASCCRL) <i>mCherry</i> <sup>C</sup> . <i>H<sub>6</sub></i>              | pSB3T5   | p15A   | Tet                     |
| pFP.R385 | [ <i>araC</i> / <i>P<sub>araBAD</sub></i> ]-B0030- <i>mCherry</i> <sup>N</sup> (NGKTTL) <i>mCherry</i> <sup>C</sup> . <i>H<sub>6</sub></i>              | pSB3T5   | p15A   | Tet                     |
| pFP.R386 | [ <i>araC</i> / <i>P<sub>araBAD</sub></i> ]-B0030- <i>mCherry</i> <sup>N</sup> (NGKSEL) <i>mCherry</i> <sup>C</sup> . <i>H<sub>6</sub></i>              | pSB3T5   | p15A   | Tet                     |
| pFP.R387 | [ <i>araC</i> / <i>P<sub>araBAD</sub></i> ]-B0030- <i>mCherry</i> <sup>N</sup> (HGKTEV) <i>mCherry</i> <sup>C</sup> . <i>H<sub>6</sub></i>              | pSB3T5   | p15A   | Tet                     |
| pFP.R388 | [ <i>araC</i> / <i>P<sub>araBAD</sub></i> ]-B0030- <i>mCherry</i> <sup>N</sup> (AKACNF) <i>mCherry</i> <sup>C</sup> . <i>H<sub>6</sub></i>              | pSB3T5   | p15A   | Tet                     |
| pFP.R389 | [ <i>araC</i> / <i>P<sub>araBAD</sub></i> ]-B0030- <i>mCherry</i> <sup>N</sup> (ATGCGK) <i>mCherry</i> <sup>C</sup> . <i>H<sub>6</sub></i>              | pSB3T5   | p15A   | Tet                     |
| pFP.R390 | [ <i>araC</i> / <i>P<sub>araBAD</sub></i> ]-B0030- <i>mCherry</i> <sup>N</sup> (QDQTKN) <i>mCherry</i> <sup>C</sup> . <i>H<sub>6</sub></i>              | pSB3T5   | p15A   | Tet                     |
| pFP.R391 | [ <i>araC</i> / <i>P<sub>araBAD</sub></i> ]-B0030- <i>mCherry</i> <sup>N</sup> (NHDSRA) <i>mCherry</i> <sup>C</sup> . <i>H<sub>6</sub></i>              | pSB3T5   | p15A   | Tet                     |
| pFP.R392 | [ <i>araC</i> / <i>P<sub>araBAD</sub></i> ]-B0030- <i>mCherry</i> <sup>N</sup> (ELKTQN) <i>mCherry</i> <sup>C</sup> . <i>H<sub>6</sub></i>              | pSB3T5   | p15A   | Tet                     |
| pFP.R393 | [ <i>araC</i> / <i>P<sub>araBAD</sub></i> ]-B0030- <i>mCherry</i> <sup>N</sup> (NGKTEL) <i>mCherry</i> <sup>C</sup> . <i>H<sub>6</sub></i>              | pSB3T5   | p15A   | Tet                     |
| pFP.R394 | [ <i>araC</i> / <i>P<sub>araBAD</sub></i> ]-B0030- <i>mCherry</i> <sup>N</sup> (AGKSLT) <i>mCherry</i> <sup>C</sup> . <i>H<sub>6</sub></i>              | pSB3T5   | p15A   | Tet                     |
| pFP.R395 | [ <i>araC</i> / <i>P<sub>araBAD</sub></i> ]-B0030- <i>mCherry</i> <sup>N</sup> (GKACEL) <i>mCherry</i> <sup>C</sup> . <i>H<sub>6</sub></i>              | pSB3T5   | p15A   | Tet                     |
| pFP.R396 | [ <i>araC</i> / <i>P<sub>araBAD</sub></i> ]-B0030- <i>mCherry</i> <sup>N</sup> (SGKTSS) <i>mCherry</i> <sup>C</sup> . <i>H<sub>6</sub></i>              | pSB3T5   | p15A   | Tet                     |
| pFP.R397 | [ <i>araC</i> / <i>P<sub>araBAD</sub></i> ]-B0030- <i>mCherry</i> <sup>N</sup> (SNLCNE) <i>mCherry</i> <sup>C</sup> . <i>H<sub>6</sub></i>              | pSB3T5   | p15A   | Tet                     |
| pFP.R398 | [ <i>araC</i> / <i>P<sub>araBAD</sub></i> ]-B0030- <i>mCherry</i> <sup>N</sup> (GGGTGL) <i>mCherry</i> <sup>C</sup> . <i>H<sub>6</sub></i>              | pSB3T5   | p15A   | Tet                     |
| pFP.R399 | [ <i>araC</i> / <i>P<sub>araBAD</sub></i> ]-B0030- <i>mCherry</i> <sup>N</sup> (HDGCSG) <i>mCherry</i> <sup>C</sup> . <i>H<sub>6</sub></i>              | pSB3T5   | p15A   | Tet                     |
| pFP.R265 | [ <i>araC</i> / <i>P<sub>araBAD</sub></i> ]-B0030- <i>mCherry</i> <sup>N</sup> (VDA).M86.(SDL) <i>mCherry</i> <sup>C</sup> . <i>H<sub>6</sub></i>       | pSB3T5   | p15A   | Tet                     |
| pFP.R266 | [ <i>araC</i> / <i>P<sub>araBAD</sub></i> ]-B0030- <i>mCherry</i> <sup>N</sup> (G GK).NpuSsp.(CWN) <i>mCherry</i> <sup>C</sup> . <i>H<sub>6</sub></i>   | pSB3T5   | p15A   | Tet                     |
| pFP.R267 | [ <i>araC</i> / <i>P<sub>araBAD</sub></i> ]-B0030- <i>mCherry</i> <sup>N</sup> (SGY).gp41-1.(SSS) <i>mCherry</i> <sup>C</sup> . <i>H<sub>6</sub></i>    | pSB3T5   | p15A   | Tet                     |
| pFP.R268 | [ <i>araC</i> / <i>P<sub>araBAD</sub></i> ]-B0030- <i>mCherry</i> <sup>N</sup> (LNR).gp41-8.(SAV) <i>mCherry</i> <sup>C</sup> . <i>H<sub>6</sub></i>    | pSB3T5   | p15A   | Tet                     |
| pFP.R269 | [ <i>araC</i> / <i>P<sub>araBAD</sub></i> ]-B0030- <i>mCherry</i> <sup>N</sup> (NPC).NrdJ-1.(SEI) <i>mCherry</i> <sup>C</sup> . <i>H<sub>6</sub></i>    | pSB3T5   | p15A   | Tet                     |
| pFP.R270 | [ <i>araC</i> / <i>P<sub>araBAD</sub></i> ]-B0030- <i>mCherry</i> <sup>N</sup> (GGG).IMPDH-1.(SIC) <i>mCherry</i> <sup>C</sup> . <i>H<sub>6</sub></i>   | pSB3T5   | p15A   | Tet                     |
| pFP.R271 | [ <i>araC</i> / <i>P<sub>araBAD</sub></i> ]-B0030- <i>mCherry</i> <sup>N</sup> (IDE).SspDnaX.(CHT) <i>mCherry</i> <sup>C</sup> . <i>H<sub>6</sub></i>   | pSB3T5   | p15A   | Tet                     |
| pFP.R272 | [ <i>araC</i> / <i>P<sub>araBAD</sub></i> ]-B0030- <i>mCherry</i> <sup>N</sup> (AGG).SspGyrB.(SAK) <i>mCherry</i> <sup>C</sup> . <i>H<sub>6</sub></i>   | pSB3T5   | p15A   | Tet                     |
| pFP.R273 | [ <i>araC</i> / <i>P<sub>araBAD</sub></i> ]-B0030- <i>mCherry</i> <sup>N</sup> (IGC).TerThyX.(SFD) <i>mCherry</i> <sup>C</sup> . <i>H<sub>6</sub></i>   | pSB3T5   | p15A   | Tet                     |
| pFP.R274 | [ <i>araC</i> / <i>P<sub>araBAD</sub></i> ]-B0030- <i>mCherry</i> <sup>N</sup> (GSK).TvoVMA.(TVI) <i>mCherry</i> <sup>C</sup> . <i>H<sub>6</sub></i>    | pSB3T5   | p15A   | Tet                     |
| pFP.R275 | [ <i>araC</i> / <i>P<sub>araBAD</sub></i> ]-B0030- <i>mCherry</i> <sup>N</sup> (SGK).PhoRadA.(TQL) <i>mCherry</i> <sup>C</sup> . <i>H<sub>6</sub></i>   | pSB3T5   | p15A   | Tet                     |
| pFP.R355 | [ <i>araC</i> / <i>P<sub>araBAD</sub></i> ]-B0030- <i>mCherry</i> <sup>N</sup> (VNQ).Cro-RIR1*.(SGR) <i>mCherry</i> <sup>C</sup> . <i>H<sub>6</sub></i> | pSB3T5   | p15A   | Tet                     |
| pFP.R356 | [ <i>araC</i> / <i>P<sub>araBAD</sub></i> ]-B0030- <i>mCherry</i> <sup>N</sup> (DKF).Cro-RPB2*.(STK) <i>mCherry</i> <sup>C</sup> . <i>H<sub>6</sub></i> | pSB3T5   | p15A   | Tet                     |
| pFP.R357 | [ <i>araC</i> / <i>P<sub>araBAD</sub></i> ]-B0030- <i>mCherry</i> <sup>N</sup> (GSK).Cro-Top2*.(CSN) <i>mCherry</i> <sup>C</sup> . <i>H<sub>6</sub></i> | pSB3T5   | p15A   | Tet                     |
| pFP.R358 | [ <i>araC</i> / <i>P<sub>araBAD</sub></i> ]-B0030- <i>mCherry</i> <sup>N</sup> (SNL).CIV-RIR1*.(CSE) <i>mCherry</i> <sup>C</sup> . <i>H<sub>6</sub></i> | pSB3T5   | p15A   | Tet                     |
| pFP.R359 | [ <i>araC</i> / <i>P<sub>araBAD</sub></i> ]-B0030- <i>mCherry</i> <sup>N</sup> (KHH).CP-Thy1*.(SVL) <i>mCherry</i> <sup>C</sup> . <i>H<sub>6</sub></i>  | pSB3T5   | p15A   | Tet                     |
| pFP.R360 | [ <i>araC</i> / <i>P<sub>araBAD</sub></i> ]-B0030- <i>mCherry</i> <sup>N</sup> (HGK).Ama-Ter*.(SEL) <i>mCherry</i> <sup>C</sup> . <i>H<sub>6</sub></i>  | pSB3T5   | p15A   | Tet                     |

|          |                                                                                                                               |        |      |     |
|----------|-------------------------------------------------------------------------------------------------------------------------------|--------|------|-----|
| pFP.R361 | [ <i>araC/P<sub>araBAD</sub></i> ]-B0030- <i>mCherry<sup>N</sup>(SNL).BsuP-RIR1*. (CSE)mCherry<sup>C</sup>.H<sub>6</sub></i>  | pSB3T5 | p15A | Tet |
| pFP.R362 | [ <i>araC/P<sub>araBAD</sub></i> ]-B0030- <i>mCherry<sup>N</sup>(ASC).CbP-RNR*. (CRL)mCherry<sup>C</sup>.H<sub>6</sub></i>    | pSB3T5 | p15A | Tet |
| pFP.R363 | [ <i>araC/P<sub>araBAD</sub></i> ]-B0030- <i>mCherry<sup>N</sup>(NGK).Ckl-Ter*. (TTL)mCherry<sup>C</sup>.H<sub>6</sub></i>    | pSB3T5 | p15A | Tet |
| pFP.R364 | [ <i>araC/P<sub>araBAD</sub></i> ]-B0030- <i>mCherry<sup>N</sup>(NGK).Cth-Ter*. (SEL)mCherry<sup>C</sup>.H<sub>6</sub></i>    | pSB3T5 | p15A | Tet |
| pFP.R365 | [ <i>araC/P<sub>araBAD</sub></i> ]-B0030- <i>mCherry<sup>N</sup>(HGK).EP-Pri*. (TEV)mCherry<sup>C</sup>.H<sub>6</sub></i>     | pSB3T5 | p15A | Tet |
| pFP.R366 | [ <i>araC/P<sub>araBAD</sub></i> ]-B0030- <i>mCherry<sup>N</sup>(AKA).LLP-Pol*. (CNF)mCherry<sup>C</sup>.H<sub>6</sub></i>    | pSB3T5 | p15A | Tet |
| pFP.R367 | [ <i>araC/P<sub>araBAD</sub></i> ]-B0030- <i>mCherry<sup>N</sup>(ATG).LP-Hel*. (CGK)mCherry<sup>C</sup>.H<sub>6</sub></i>     | pSB3T5 | p15A | Tet |
| pFP.R368 | [ <i>araC/P<sub>araBAD</sub></i> ]-B0030- <i>mCherry<sup>N</sup>(QDQ).MP-B-DnaB*. (TKN)mCherry<sup>C</sup>.H<sub>6</sub></i>  | pSB3T5 | p15A | Tet |
| pFP.R369 | [ <i>araC/P<sub>araBAD</sub></i> ]-B0030- <i>mCherry<sup>N</sup>(NHD).MP-K-gp53*. (SRA)mCherry<sup>C</sup>.H<sub>6</sub></i>  | pSB3T5 | p15A | Tet |
| pFP.R370 | [ <i>araC/P<sub>araBAD</sub></i> ]-B0030- <i>mCherry<sup>N</sup>(ELK).MP-C-gp206*. (TQN)mCherry<sup>C</sup>.H<sub>6</sub></i> | pSB3T5 | p15A | Tet |
| pFP.R371 | [ <i>araC/P<sub>araBAD</sub></i> ]-B0030- <i>mCherry<sup>N</sup>(NGK).MP-M-DnaB*. (TEL)mCherry<sup>C</sup>.H<sub>6</sub></i>  | pSB3T5 | p15A | Tet |
| pFP.R372 | [ <i>araC/P<sub>araBAD</sub></i> ]-B0030- <i>mCherry<sup>N</sup>(AGK).PP-Phi*. (SLT)mCherry<sup>C</sup>.H<sub>6</sub></i>     | pSB3T5 | p15A | Tet |
| pFP.R373 | [ <i>araC/P<sub>araBAD</sub></i> ]-B0030- <i>mCherry<sup>N</sup>(GKA).SaP-dpol*. (CEL)mCherry<sup>C</sup>.H<sub>6</sub></i>   | pSB3T5 | p15A | Tet |
| pFP.R374 | [ <i>araC/P<sub>araBAD</sub></i> ]-B0030- <i>mCherry<sup>N</sup>(SGK).SaP-Hel*. (TSS)mCherry<sup>C</sup>.H<sub>6</sub></i>    | pSB3T5 | p15A | Tet |
| pFP.R375 | [ <i>araC/P<sub>araBAD</sub></i> ]-B0030- <i>mCherry<sup>N</sup>(SNL).NrdA-2*. (CNE)mCherry<sup>C</sup>.H<sub>6</sub></i>     | pSB3T5 | p15A | Tet |
| pFP.R376 | [ <i>araC/P<sub>araBAD</sub></i> ]-B0030- <i>mCherry<sup>N</sup>(GGG).Pfu-RIR1-1*. (TGL)mCherry<sup>C</sup>.H<sub>6</sub></i> | pSB3T5 | p15A | Tet |
| pFP.R377 | [ <i>araC/P<sub>araBAD</sub></i> ]-B0030- <i>mCherry<sup>N</sup>(HDG).Mja-KIbA*. (CSG)mCherry<sup>C</sup>.H<sub>6</sub></i>   | pSB3T5 | p15A | Tet |
| pFP.R400 | [ <i>araC/P<sub>araBAD</sub></i> ]-B0030- <i>mCherry<sup>N</sup>(GGK).NpuSsp*. (CWN)mCherry<sup>C</sup>.H<sub>6</sub></i>     | pSB3T5 | p15A | Tet |
| pFP.R401 | [ <i>araC/P<sub>araBAD</sub></i> ]-B0030- <i>mCherry<sup>N</sup>(IGC).TerThyX*. (SFD)mCherry<sup>C</sup>.H<sub>6</sub></i>    | pSB3T5 | p15A | Tet |
| pFP.R276 | [ <i>araC/P<sub>araBAD</sub></i> ]-B0030- <i>mCherry<sup>N</sup>(VDA).M86<sup>N1</sup></i>                                    | pSB3T5 | p15A | Tet |
| pFP.R277 | [ <i>araC/P<sub>araBAD</sub></i> ]-B0030- <i>mCherry<sup>N</sup>(GGK).NpuSsp<sup>N1</sup></i>                                 | pSB3T5 | p15A | Tet |
| pFP.R278 | [ <i>araC/P<sub>araBAD</sub></i> ]-B0030- <i>mCherry<sup>N</sup>(SGY).gp41-1<sup>N1</sup></i>                                 | pSB3T5 | p15A | Tet |
| pFP.R279 | [ <i>araC/P<sub>araBAD</sub></i> ]-B0030- <i>mCherry<sup>N</sup>(LNR).gp41-8<sup>N1</sup></i>                                 | pSB3T5 | p15A | Tet |
| pFP.R280 | [ <i>araC/P<sub>araBAD</sub></i> ]-B0030- <i>mCherry<sup>N</sup>(NPC).NrdJ-1<sup>N1</sup></i>                                 | pSB3T5 | p15A | Tet |
| pFP.R281 | [ <i>araC/P<sub>araBAD</sub></i> ]-B0030- <i>mCherry<sup>N</sup>(GGG).IMPDH-1<sup>N1</sup></i>                                | pSB3T5 | p15A | Tet |
| pFP.R282 | [ <i>araC/P<sub>araBAD</sub></i> ]-B0030- <i>mCherry<sup>N</sup>(IDE).SspDnaX<sup>N1</sup></i>                                | pSB3T5 | p15A | Tet |
| pFP.R283 | [ <i>araC/P<sub>araBAD</sub></i> ]-B0030- <i>mCherry<sup>N</sup>(AGG).SspGyrB<sup>N1</sup></i>                                | pSB3T5 | p15A | Tet |
| pFP.R284 | [ <i>araC/P<sub>araBAD</sub></i> ]-B0030- <i>mCherry<sup>N</sup>(IGC).TerThyX<sup>N1</sup></i>                                | pSB3T5 | p15A | Tet |
| pFP.R285 | [ <i>araC/P<sub>araBAD</sub></i> ]-B0030- <i>mCherry<sup>N</sup>(GSK).TvoVMA<sup>N1</sup></i>                                 | pSB3T5 | p15A | Tet |
| pFP.R286 | [ <i>araC/P<sub>araBAD</sub></i> ]-B0030- <i>mCherry<sup>N</sup>(SGK).PhoRadA<sup>N1</sup></i>                                | pSB3T5 | p15A | Tet |
| pFP.R448 | [ <i>araC/P<sub>araBAD</sub></i> ]-B0030- <i>mCherry<sup>N</sup>(HGK).Ama-Ter<sup>N1</sup></i>                                | pSB3T5 | p15A | Tet |
| pFP.R449 | [ <i>araC/P<sub>araBAD</sub></i> ]-B0030- <i>mCherry<sup>N</sup>(NGK).Cth-Ter<sup>N1</sup></i>                                | pSB3T5 | p15A | Tet |
| pFP.R450 | [ <i>araC/P<sub>araBAD</sub></i> ]-B0030- <i>mCherry<sup>N</sup>(AKA).LLP-Pol<sup>N1</sup></i>                                | pSB3T5 | p15A | Tet |
| pFP.R451 | [ <i>araC/P<sub>araBAD</sub></i> ]-B0030- <i>mCherry<sup>N</sup>(ATG).LP.Hel<sup>N1</sup></i>                                 | pSB3T5 | p15A | Tet |
| pFP.R452 | [ <i>araC/P<sub>araBAD</sub></i> ]-B0030- <i>mCherry<sup>N</sup>(QDQ).MP-B-DnaB<sup>N1</sup></i>                              | pSB3T5 | p15A | Tet |
| pFP.R453 | [ <i>araC/P<sub>araBAD</sub></i> ]-B0030- <i>mCherry<sup>N</sup>(NGK).MP-M-DnaB<sup>N1</sup></i>                              | pSB3T5 | p15A | Tet |
| pFP.R454 | [ <i>araC/P<sub>araBAD</sub></i> ]-B0030- <i>mCherry<sup>N</sup>(GKA).SaP-dpol<sup>N1</sup></i>                               | pSB3T5 | p15A | Tet |
| pFP.R456 | [ <i>araC/P<sub>araBAD</sub></i> ]-B0030- <i>mCherry<sup>N</sup>(SNL).NrdA-2<sup>N1</sup></i>                                 | pSB3T5 | p15A | Tet |
| pFP.R457 | [ <i>araC/P<sub>araBAD</sub></i> ]-B0030- <i>mCherry<sup>N</sup>(HDG).Mja-KIbA<sup>N1</sup></i>                               | pSB3T5 | p15A | Tet |
| pFP.R232 | [ <i>araC/P<sub>araBAD</sub></i> ]-B0030- <i>mCherry<sup>N</sup>(VDA).M86<sup>N2</sup></i>                                    | pSB3T5 | p15A | Tet |
| pFP.R233 | [ <i>araC/P<sub>araBAD</sub></i> ]-B0030- <i>mCherry<sup>N</sup>(GGK).NpuSsp<sup>N2</sup></i>                                 | pSB3T5 | p15A | Tet |
| pFP.R195 | [ <i>araC/P<sub>araBAD</sub></i> ]-B0030- <i>mCherry<sup>N</sup>(SGY).gp41-1<sup>N2</sup></i>                                 | pSB3T5 | p15A | Tet |
| pFP.R264 | [ <i>araC/P<sub>araBAD</sub></i> ]-B0030- <i>mCherry<sup>N</sup>(LNR).gp41-8<sup>N2</sup></i>                                 | pSB3T5 | p15A | Tet |
| pFP.R235 | [ <i>araC/P<sub>araBAD</sub></i> ]-B0030- <i>mCherry<sup>N</sup>(NPC).NrdJ-1<sup>N2</sup></i>                                 | pSB3T5 | p15A | Tet |
| pFP.R236 | [ <i>araC/P<sub>araBAD</sub></i> ]-B0030- <i>mCherry<sup>N</sup>(GGG).IMPDH-1<sup>N2</sup></i>                                | pSB3T5 | p15A | Tet |
| pFP.R237 | [ <i>araC/P<sub>araBAD</sub></i> ]-B0030- <i>mCherry<sup>N</sup>(IDE).SspDnaX<sup>N2</sup></i>                                | pSB3T5 | p15A | Tet |
| pFP.R238 | [ <i>araC/P<sub>araBAD</sub></i> ]-B0030- <i>mCherry<sup>N</sup>(AGG).SspGyrB<sup>N2</sup></i>                                | pSB3T5 | p15A | Tet |
| pFP.R239 | [ <i>araC/P<sub>araBAD</sub></i> ]-B0030- <i>mCherry<sup>N</sup>(IGC).TerThyX<sup>N2</sup></i>                                | pSB3T5 | p15A | Tet |
| pFP.R443 | [ <i>araC/P<sub>araBAD</sub></i> ]-B0030- <i>mCherry<sup>N</sup>(GSK).TvoVMA<sup>N2</sup></i>                                 | pSB3T5 | p15A | Tet |
| pFP.R241 | [ <i>araC/P<sub>araBAD</sub></i> ]-B0030- <i>mCherry<sup>N</sup>(SGK).PhoRadA<sup>N2</sup></i>                                | pSB3T5 | p15A | Tet |
| pFP.R406 | [ <i>araC/P<sub>araBAD</sub></i> ]-B0030- <i>mCherry<sup>N</sup>(HGK).Ama-Ter<sup>N2</sup></i>                                | pSB3T5 | p15A | Tet |
| pFP.R407 | [ <i>araC/P<sub>araBAD</sub></i> ]-B0030- <i>mCherry<sup>N</sup>(NGK).Cth-Ter<sup>N2</sup></i>                                | pSB3T5 | p15A | Tet |
| pFP.R408 | [ <i>araC/P<sub>araBAD</sub></i> ]-B0030- <i>mCherry<sup>N</sup>(AKA).LLP-Pol<sup>N2</sup></i>                                | pSB3T5 | p15A | Tet |
| pFP.R409 | [ <i>araC/P<sub>araBAD</sub></i> ]-B0030- <i>mCherry<sup>N</sup>(ATG).LP.Hel<sup>N2</sup></i>                                 | pSB3T5 | p15A | Tet |
| pFP.R410 | [ <i>araC/P<sub>araBAD</sub></i> ]-B0030- <i>mCherry<sup>N</sup>(QDQ).MP-B-DnaB<sup>N2</sup></i>                              | pSB3T5 | p15A | Tet |
| pFP.R412 | [ <i>araC/P<sub>araBAD</sub></i> ]-B0030- <i>mCherry<sup>N</sup>(NGK).MP-M-DnaB<sup>N2</sup></i>                              | pSB3T5 | p15A | Tet |
| pFP.R413 | [ <i>araC/P<sub>araBAD</sub></i> ]-B0030- <i>mCherry<sup>N</sup>(GKA).SaP-dpol<sup>N2</sup></i>                               | pSB3T5 | p15A | Tet |
| pFP.R415 | [ <i>araC/P<sub>araBAD</sub></i> ]-B0030- <i>mCherry<sup>N</sup>(SNL).NrdA-2<sup>N2</sup></i>                                 | pSB3T5 | p15A | Tet |

|          |                                                                                                                                   |        |      |     |
|----------|-----------------------------------------------------------------------------------------------------------------------------------|--------|------|-----|
| pFP.R416 | [ <i>araC/P<sub>araBAD</sub></i> ]-B0030- <i>mCherry<sup>N</sup></i> (HDG). <i>Mja-KlbA<sup>N2</sup></i>                          | pSB3T5 | p15A | Tet |
| pFP.R287 | [ <i>araC/P<sub>araBAD</sub></i> ]-B0030- <i>mCherry<sup>N</sup></i> (VDA). <i>M86<sup>N3</sup></i>                               | pSB3T5 | p15A | Tet |
| pFP.R288 | [ <i>araC/P<sub>araBAD</sub></i> ]-B0030- <i>mCherry<sup>N</sup></i> (GGK). <i>NpuSsp<sup>N3</sup></i>                            | pSB3T5 | p15A | Tet |
| pFP.R289 | [ <i>araC/P<sub>araBAD</sub></i> ]-B0030- <i>mCherry<sup>N</sup></i> (SGY). <i>gp41-1<sup>N3</sup></i>                            | pSB3T5 | p15A | Tet |
| pFP.R290 | [ <i>araC/P<sub>araBAD</sub></i> ]-B0030- <i>mCherry<sup>N</sup></i> (LNR). <i>gp41-8<sup>N3</sup></i>                            | pSB3T5 | p15A | Tet |
| pFP.R291 | [ <i>araC/P<sub>araBAD</sub></i> ]-B0030- <i>mCherry<sup>N</sup></i> (NPC). <i>NrdJ-1<sup>N3</sup></i>                            | pSB3T5 | p15A | Tet |
| pFP.R292 | [ <i>araC/P<sub>araBAD</sub></i> ]-B0030- <i>mCherry<sup>N</sup></i> (GGG). <i>IMPDH-1<sup>N3</sup></i>                           | pSB3T5 | p15A | Tet |
| pFP.R293 | [ <i>araC/P<sub>araBAD</sub></i> ]-B0030- <i>mCherry<sup>N</sup></i> (IDE). <i>SspDnaX<sup>N3</sup></i>                           | pSB3T5 | p15A | Tet |
| pFP.R294 | [ <i>araC/P<sub>araBAD</sub></i> ]-B0030- <i>mCherry<sup>N</sup></i> (AGG). <i>SspGyrB<sup>N3</sup></i>                           | pSB3T5 | p15A | Tet |
| pFP.R295 | [ <i>araC/P<sub>araBAD</sub></i> ]-B0030- <i>mCherry<sup>N</sup></i> (IGC). <i>TerThyX<sup>N3</sup></i>                           | pSB3T5 | p15A | Tet |
| pFP.R296 | [ <i>araC/P<sub>araBAD</sub></i> ]-B0030- <i>mCherry<sup>N</sup></i> (GSK). <i>TvoVMA<sup>N3</sup></i>                            | pSB3T5 | p15A | Tet |
| pFP.R297 | [ <i>araC/P<sub>araBAD</sub></i> ]-B0030- <i>mCherry<sup>N</sup></i> (SGK). <i>PhoRadA<sup>N3</sup></i>                           | pSB3T5 | p15A | Tet |
| pFP.R459 | [ <i>araC/P<sub>araBAD</sub></i> ]-B0030- <i>mCherry<sup>N</sup></i> (HGK). <i>Ama-Ter<sup>N3*</sup></i>                          | pSB3T5 | p15A | Tet |
| pFP.R460 | [ <i>araC/P<sub>araBAD</sub></i> ]-B0030- <i>mCherry<sup>N</sup></i> (NGK). <i>Cth-Ter<sup>N3*</sup></i>                          | pSB3T5 | p15A | Tet |
| pFP.R461 | [ <i>araC/P<sub>araBAD</sub></i> ]-B0030- <i>mCherry<sup>N</sup></i> (AKA). <i>LLP-Pol<sup>N3*</sup></i>                          | pSB3T5 | p15A | Tet |
| pFP.R462 | [ <i>araC/P<sub>araBAD</sub></i> ]-B0030- <i>mCherry<sup>N</sup></i> (ATG). <i>LP.HeI<sup>N3*</sup></i>                           | pSB3T5 | p15A | Tet |
| pFP.R463 | [ <i>araC/P<sub>araBAD</sub></i> ]-B0030- <i>mCherry<sup>N</sup></i> (QDQ). <i>MP-B-DnaB<sup>N3*</sup></i>                        | pSB3T5 | p15A | Tet |
| pFP.R464 | [ <i>araC/P<sub>araBAD</sub></i> ]-B0030- <i>mCherry<sup>N</sup></i> (NGK). <i>MP-M-DnaB<sup>N3*</sup></i>                        | pSB3T5 | p15A | Tet |
| pFP.R465 | [ <i>araC/P<sub>araBAD</sub></i> ]-B0030- <i>mCherry<sup>N</sup></i> (GKA). <i>SaP-dpol<sup>N3*</sup></i>                         | pSB3T5 | p15A | Tet |
| pFP.R467 | [ <i>araC/P<sub>araBAD</sub></i> ]-B0030- <i>mCherry<sup>N</sup></i> (SNL). <i>NrdA-2<sup>N3*</sup></i>                           | pSB3T5 | p15A | Tet |
| pFP.R468 | [ <i>araC/P<sub>araBAD</sub></i> ]-B0030- <i>mCherry<sup>N</sup></i> (HDG). <i>Mja-KlbA<sup>N3*</sup></i>                         | pSB3T5 | p15A | Tet |
| pFP.R321 | [ <i>araC/P<sub>araBAD</sub></i> ]-B0030- <i>M86<sup>C1</sup></i> .( <i>SDL</i> ) <i>mCherry<sup>C</sup>.H<sub>6</sub></i>        | pSB1A3 | pMB1 | Amp |
| pFP.R322 | [ <i>araC/P<sub>araBAD</sub></i> ]-B0030- <i>NpuSsp<sup>C1</sup></i> .( <i>CWN</i> ) <i>mCherry<sup>C</sup>.H<sub>6</sub></i>     | pSB1A3 | pMB1 | Amp |
| pFP.R323 | [ <i>araC/P<sub>araBAD</sub></i> ]-B0030- <i>gp41-1<sup>C1</sup></i> .( <i>SSS</i> ) <i>mCherry<sup>C</sup>.H<sub>6</sub></i>     | pSB1A3 | pMB1 | Amp |
| pFP.R324 | [ <i>araC/P<sub>araBAD</sub></i> ]-B0030- <i>gp41-8<sup>C1</sup></i> .( <i>SAV</i> ) <i>mCherry<sup>C</sup>.H<sub>6</sub></i>     | pSB1A3 | pMB1 | Amp |
| pFP.R325 | [ <i>araC/P<sub>araBAD</sub></i> ]-B0030- <i>NrdJ-1<sup>C1</sup></i> .( <i>SEI</i> ) <i>mCherry<sup>C</sup>.H<sub>6</sub></i>     | pSB1A3 | pMB1 | Amp |
| pFP.R326 | [ <i>araC/P<sub>araBAD</sub></i> ]-B0030- <i>IMPDH-1<sup>C1</sup></i> .( <i>SIC</i> ) <i>mCherry<sup>C</sup>.H<sub>6</sub></i>    | pSB1A3 | pMB1 | Amp |
| pFP.R327 | [ <i>araC/P<sub>araBAD</sub></i> ]-B0030- <i>SspDnaX<sup>C1</sup></i> .( <i>CHT</i> ) <i>mCherry<sup>C</sup>.H<sub>6</sub></i>    | pSB1A3 | pMB1 | Amp |
| pFP.R328 | [ <i>araC/P<sub>araBAD</sub></i> ]-B0030- <i>SspGyrB<sup>C1</sup></i> .( <i>SAK</i> ) <i>mCherry<sup>C</sup>.H<sub>6</sub></i>    | pSB1A3 | pMB1 | Amp |
| pFP.R329 | [ <i>araC/P<sub>araBAD</sub></i> ]-B0030- <i>TerThyX<sup>C1</sup></i> .( <i>SFD</i> ) <i>mCherry<sup>C</sup>.H<sub>6</sub></i>    | pSB1A3 | pMB1 | Amp |
| pFP.R330 | [ <i>araC/P<sub>araBAD</sub></i> ]-B0030- <i>TvoVMA<sup>C1</sup></i> .( <i>TVI</i> ) <i>mCherry<sup>C</sup>.H<sub>6</sub></i>     | pSB1A3 | pMB1 | Amp |
| pFP.R331 | [ <i>araC/P<sub>araBAD</sub></i> ]-B0030- <i>PhoRadA<sup>C1</sup></i> .( <i>TQL</i> ) <i>mCherry<sup>C</sup>.H<sub>6</sub></i>    | pSB1A3 | pMB1 | Amp |
| pFP.R481 | [ <i>araC/P<sub>araBAD</sub></i> ]-B0030- <i>Ama-Ter<sup>C1*</sup></i> .( <i>SEL</i> ) <i>mCherry<sup>C</sup>.H<sub>6</sub></i>   | pSB1A3 | pMB1 | Amp |
| pFP.R482 | [ <i>araC/P<sub>araBAD</sub></i> ]-B0030- <i>Cth-Ter<sup>C1*</sup></i> .( <i>SEL</i> ) <i>mCherry<sup>C</sup>.H<sub>6</sub></i>   | pSB1A3 | pMB1 | Amp |
| pFP.R483 | [ <i>araC/P<sub>araBAD</sub></i> ]-B0030- <i>LLP-Pol<sup>C1*</sup></i> .( <i>CNF</i> ) <i>mCherry<sup>C</sup>.H<sub>6</sub></i>   | pSB1A3 | pMB1 | Amp |
| pFP.R484 | [ <i>araC/P<sub>araBAD</sub></i> ]-B0030- <i>LP.HeI<sup>C1*</sup></i> .( <i>CGK</i> ) <i>mCherry<sup>C</sup>.H<sub>6</sub></i>    | pSB1A3 | pMB1 | Amp |
| pFP.R485 | [ <i>araC/P<sub>araBAD</sub></i> ]-B0030- <i>MP-B-DnaB<sup>C1*</sup></i> .( <i>TKN</i> ) <i>mCherry<sup>C</sup>.H<sub>6</sub></i> | pSB1A3 | pMB1 | Amp |
| pFP.R486 | [ <i>araC/P<sub>araBAD</sub></i> ]-B0030- <i>MP-M-DnaB<sup>C1*</sup></i> .( <i>TEL</i> ) <i>mCherry<sup>C</sup>.H<sub>6</sub></i> | pSB1A3 | pMB1 | Amp |
| pFP.R487 | [ <i>araC/P<sub>araBAD</sub></i> ]-B0030- <i>SaP-dpol<sup>C1*</sup></i> .( <i>CEL</i> ) <i>mCherry<sup>C</sup>.H<sub>6</sub></i>  | pSB1A3 | pMB1 | Amp |
| pFP.R489 | [ <i>araC/P<sub>araBAD</sub></i> ]-B0030- <i>NrdA-2<sup>C1*</sup></i> .( <i>CNE</i> ) <i>mCherry<sup>C</sup>.H<sub>6</sub></i>    | pSB1A3 | pMB1 | Amp |
| pFP.R490 | [ <i>araC/P<sub>araBAD</sub></i> ]-B0030- <i>Mja-KlbA<sup>C1*</sup></i> .( <i>CSG</i> ) <i>mCherry<sup>C</sup>.H<sub>6</sub></i>  | pSB1A3 | pMB1 | Amp |
| pFP.R182 | [ <i>araC/P<sub>araBAD</sub></i> ]-B0032- <i>M86<sup>C2</sup></i> .( <i>SDL</i> ) <i>mCherry<sup>C</sup>.H<sub>6</sub></i>        | pSB1A3 | pMB1 | Amp |
| pFP.R243 | [ <i>araC/P<sub>araBAD</sub></i> ]-B0030- <i>NpuSsp<sup>C2</sup></i> .( <i>CWN</i> ) <i>mCherry<sup>C</sup>.H<sub>6</sub></i>     | pSB1A3 | pMB1 | Amp |
| pFP.R244 | [ <i>araC/P<sub>araBAD</sub></i> ]-B0030- <i>gp41-1<sup>C2</sup></i> .( <i>SSS</i> ) <i>mCherry<sup>C</sup>.H<sub>6</sub></i>     | pSB1A3 | pMB1 | Amp |
| pFP.R245 | [ <i>araC/P<sub>araBAD</sub></i> ]-B0030- <i>gp41-8<sup>C2</sup></i> .( <i>SAV</i> ) <i>mCherry<sup>C</sup>.H<sub>6</sub></i>     | pSB1A3 | pMB1 | Amp |
| pFP.R246 | [ <i>araC/P<sub>araBAD</sub></i> ]-B0030- <i>NrdJ-1<sup>C2</sup></i> .( <i>SEI</i> ) <i>mCherry<sup>C</sup>.H<sub>6</sub></i>     | pSB1A3 | pMB1 | Amp |
| pFP.R258 | [ <i>araC/P<sub>araBAD</sub></i> ]-B0030- <i>ST.IMPDH-1<sup>C2</sup></i> .( <i>SIC</i> ) <i>mCherry<sup>C</sup>.H<sub>6</sub></i> | pSB1A3 | pMB1 | Amp |
| pFP.R259 | [ <i>araC/P<sub>araBAD</sub></i> ]-B0030- <i>ST.SspDnaX<sup>C2</sup></i> .( <i>CHT</i> ) <i>mCherry<sup>C</sup>.H<sub>6</sub></i> | pSB1A3 | pMB1 | Amp |
| pFP.R188 | [ <i>araC/P<sub>araBAD</sub></i> ]-B0032- <i>SspGyrB<sup>C2</sup></i> .( <i>SAK</i> ) <i>mCherry<sup>C</sup>.H<sub>6</sub></i>    | pSB1A3 | pMB1 | Amp |
| pFP.R261 | [ <i>araC/P<sub>araBAD</sub></i> ]-B0030- <i>ST.TerThyX<sup>C2</sup></i> .( <i>SFD</i> ) <i>mCherry<sup>C</sup>.H<sub>6</sub></i> | pSB1A3 | pMB1 | Amp |
| pFP.R445 | [ <i>araC/P<sub>araBAD</sub></i> ]-B0030- <i>TvoVMA<sup>C2</sup></i> .( <i>TVI</i> ) <i>mCherry<sup>C</sup>.H<sub>6</sub></i>     | pSB1A3 | pMB1 | Amp |
| pFP.R263 | [ <i>araC/P<sub>araBAD</sub></i> ]-B0030- <i>ST.PhoRadA<sup>C2</sup></i> .( <i>TQL</i> ) <i>mCherry<sup>C</sup>.H<sub>6</sub></i> | pSB1A3 | pMB1 | Amp |
| pFP.R432 | [ <i>araC/P<sub>araBAD</sub></i> ]-B0030- <i>Ama-Ter<sup>C2</sup></i> .( <i>SEL</i> ) <i>mCherry<sup>C</sup>.H<sub>6</sub></i>    | pSB1A3 | pMB1 | Amp |
| pFP.R433 | [ <i>araC/P<sub>araBAD</sub></i> ]-B0030- <i>Cth-Ter<sup>C2</sup></i> .( <i>SEL</i> ) <i>mCherry<sup>C</sup>.H<sub>6</sub></i>    | pSB1A3 | pMB1 | Amp |
| pFP.R434 | [ <i>araC/P<sub>araBAD</sub></i> ]-B0030- <i>LLP-Pol<sup>C2</sup></i> .( <i>CNF</i> ) <i>mCherry<sup>C</sup>.H<sub>6</sub></i>    | pSB1A3 | pMB1 | Amp |
| pFP.R435 | [ <i>araC/P<sub>araBAD</sub></i> ]-B0030- <i>LP.HeI<sup>C2</sup></i> .( <i>CGK</i> ) <i>mCherry<sup>C</sup>.H<sub>6</sub></i>     | pSB1A3 | pMB1 | Amp |
| pFP.R436 | [ <i>araC/P<sub>araBAD</sub></i> ]-B0030- <i>MP-B-DnaB<sup>C2</sup></i> .( <i>TKN</i> ) <i>mCherry<sup>C</sup>.H<sub>6</sub></i>  | pSB1A3 | pMB1 | Amp |
| pFP.R438 | [ <i>araC/P<sub>araBAD</sub></i> ]-B0030- <i>MP-M-DnaB<sup>C2</sup></i> .( <i>TEL</i> ) <i>mCherry<sup>C</sup>.H<sub>6</sub></i>  | pSB1A3 | pMB1 | Amp |

|           |                                                                                                                       |          |        |     |
|-----------|-----------------------------------------------------------------------------------------------------------------------|----------|--------|-----|
| pFP.R439  | [ <i>araC/P<sub>araBAD</sub></i> ]-B0030-SaP-dpoI <sup>C2</sup> .( <i>CEL</i> )mCherry <sup>C</sup> .H <sub>6</sub>   | pSB1A3   | pMB1   | Amp |
| pFP.R441  | [ <i>araC/P<sub>araBAD</sub></i> ]-B0030-NrdA-2 <sup>C2</sup> .( <i>CNE</i> )mCherry <sup>C</sup> .H <sub>6</sub>     | pSB1A3   | pMB1   | Amp |
| pFP.R442  | [ <i>araC/P<sub>araBAD</sub></i> ]-B0030-Mja-Klba <sup>C2</sup> .( <i>CSG</i> )mCherry <sup>C</sup> .H <sub>6</sub>   | pSB1A3   | pMB1   | Amp |
| pFP.R332  | [ <i>araC/P<sub>araBAD</sub></i> ]-B0030-M86 <sup>C3</sup> .( <i>SDL</i> )mCherry <sup>C</sup> .H <sub>6</sub>        | pSB1A3   | pMB1   | Amp |
| pFP.R333  | [ <i>araC/P<sub>araBAD</sub></i> ]-B0030-NpuSsp <sup>C3</sup> .( <i>CWN</i> )mCherry <sup>C</sup> .H <sub>6</sub>     | pSB1A3   | pMB1   | Amp |
| pFP.R334  | [ <i>araC/P<sub>araBAD</sub></i> ]-B0030-gp41-1 <sup>C3</sup> .( <i>SSS</i> )mCherry <sup>C</sup> .H <sub>6</sub>     | pSB1A3   | pMB1   | Amp |
| pFP.R335  | [ <i>araC/P<sub>araBAD</sub></i> ]-B0030-gp41-8 <sup>C3</sup> .( <i>SAV</i> )mCherry <sup>C</sup> .H <sub>6</sub>     | pSB1A3   | pMB1   | Amp |
| pFP.R336  | [ <i>araC/P<sub>araBAD</sub></i> ]-B0030-NrdJ-1 <sup>C3</sup> .( <i>SEI</i> )mCherry <sup>C</sup> .H <sub>6</sub>     | pSB1A3   | pMB1   | Amp |
| pFP.R337  | [ <i>araC/P<sub>araBAD</sub></i> ]-B0030-IMPDH-1 <sup>C3</sup> .( <i>SIC</i> )mCherry <sup>C</sup> .H <sub>6</sub>    | pSB1A3   | pMB1   | Amp |
| pFP.R338  | [ <i>araC/P<sub>araBAD</sub></i> ]-B0030-SspDnaX <sup>C3</sup> .( <i>CHT</i> )mCherry <sup>C</sup> .H <sub>6</sub>    | pSB1A3   | pMB1   | Amp |
| pFP.R339  | [ <i>araC/P<sub>araBAD</sub></i> ]-B0030-SspGyrB <sup>C3</sup> .( <i>SAK</i> )mCherry <sup>C</sup> .H <sub>6</sub>    | pSB1A3   | pMB1   | Amp |
| pFP.R340  | [ <i>araC/P<sub>araBAD</sub></i> ]-B0030-TerThyX <sup>C3</sup> .( <i>SFD</i> )mCherry <sup>C</sup> .H <sub>6</sub>    | pSB1A3   | pMB1   | Amp |
| pFP.R341  | [ <i>araC/P<sub>araBAD</sub></i> ]-B0030-TvoVMA <sup>C3</sup> .( <i>TVI</i> )mCherry <sup>C</sup> .H <sub>6</sub>     | pSB1A3   | pMB1   | Amp |
| pFP.R342  | [ <i>araC/P<sub>araBAD</sub></i> ]-B0030-PhoRadA <sup>C3</sup> .( <i>TQL</i> )mCherry <sup>C</sup> .H <sub>6</sub>    | pSB1A3   | pMB1   | Amp |
| pFP.R492  | [ <i>araC/P<sub>araBAD</sub></i> ]-B0030-Ama-Ter <sup>C3</sup> .( <i>SEL</i> )mCherry <sup>C</sup> .H <sub>6</sub>    | pSB1A3   | pMB1   | Amp |
| pFP.R493  | [ <i>araC/P<sub>araBAD</sub></i> ]-B0030-Cth-Ter <sup>C3</sup> .( <i>SEL</i> )mCherry <sup>C</sup> .H <sub>6</sub>    | pSB1A3   | pMB1   | Amp |
| pFP.R494  | [ <i>araC/P<sub>araBAD</sub></i> ]-B0030-LLP-PoI <sup>C3</sup> .( <i>CNF</i> )mCherry <sup>C</sup> .H <sub>6</sub>    | pSB1A3   | pMB1   | Amp |
| pFP.R495  | [ <i>araC/P<sub>araBAD</sub></i> ]-B0030-LP.Hel <sup>C3</sup> .( <i>CGK</i> )mCherry <sup>C</sup> .H <sub>6</sub>     | pSB1A3   | pMB1   | Amp |
| pFP.R496  | [ <i>araC/P<sub>araBAD</sub></i> ]-B0030-MP-B-DnaB <sup>C3</sup> .( <i>TKN</i> )mCherry <sup>C</sup> .H <sub>6</sub>  | pSB1A3   | pMB1   | Amp |
| pFP.R497  | [ <i>araC/P<sub>araBAD</sub></i> ]-B0030-MP-M-DnaB <sup>C3</sup> .( <i>TEL</i> )mCherry <sup>C</sup> .H <sub>6</sub>  | pSB1A3   | pMB1   | Amp |
| pFP.R498  | [ <i>araC/P<sub>araBAD</sub></i> ]-B0030-SaP-dpoI <sup>C3</sup> .( <i>CEL</i> )mCherry <sup>C</sup> .H <sub>6</sub>   | pSB1A3   | pMB1   | Amp |
| pFP.R500  | [ <i>araC/P<sub>araBAD</sub></i> ]-B0030-NrdA-2 <sup>C3</sup> .( <i>CNE</i> )mCherry <sup>C</sup> .H <sub>6</sub>     | pSB1A3   | pMB1   | Amp |
| pFP.R501  | [ <i>araC/P<sub>araBAD</sub></i> ]-B0030-Mja-Klba <sup>C3</sup> .( <i>CSG</i> )mCherry <sup>C</sup> .H <sub>6</sub>   | pSB1A3   | pMB1   | Amp |
| pFP.R504  | [ <i>araC/P<sub>araBAD</sub></i> ]-B0030-mCherry <sup>N</sup> (GGK).NpuSsp <sup>N3*</sup>                             | pSB3T5   | p15A   | Tet |
| pFP.R506  | [ <i>araC/P<sub>araBAD</sub></i> ]-B0030-NpuSsp <sup>C1*</sup> .( <i>CWN</i> )mCherry <sup>C</sup> .H <sub>6</sub>    | pSB1A3   | pMB1   | Amp |
| pFP.R505  | [ <i>araC/P<sub>araBAD</sub></i> ]-B0030-mCherry <sup>N</sup> (IGC).TerThyX <sup>N3*</sup>                            | pSB3T5   | p15A   | Tet |
| pFP.R507  | [ <i>araC/P<sub>araBAD</sub></i> ]-B0030-TerThyX <sup>C1*</sup> .( <i>SFD</i> )mCherry <sup>C</sup> .H <sub>6</sub>   | pSB1A3   | pMB1   | Amp |
| pFP.R541  | [ <i>lacI/P<sub>T7,lacO</sub></i> ]-B0030-ST.M86 <sup>C2</sup> .( <i>SDL</i> )mCherry <sup>C</sup> .H <sub>6</sub>    | pET11    | pBR322 | Amp |
| pFP.R542  | [ <i>lacI/P<sub>T7,lacO</sub></i> ]-B0030-ST.NpuSsp <sup>C2</sup> .( <i>CWN</i> )mCherry <sup>C</sup> .H <sub>6</sub> | pET11    | pBR322 | Amp |
| pFP.R517  | [ <i>rhaS/P<sub>rhaBAD</sub></i> ]-B0032-M86 <sup>C2</sup> .( <i>SDL</i> )mCherry <sup>C</sup> .H <sub>6</sub>        | pSB1A3   | pMB1   | Amp |
| pFP.R518  | [ <i>rhaS/P<sub>rhaBAD</sub></i> ]-B0030-gp41-1 <sup>C2</sup> .( <i>SSS</i> )mCherry <sup>C</sup> .H <sub>6</sub>     | pSB1A3   | pMB1   | Amp |
| pFP.R519  | [ <i>rhaS/P<sub>rhaBAD</sub></i> ]-B0030-gp41-8 <sup>C2</sup> .( <i>SAV</i> )mCherry <sup>C</sup> .H <sub>6</sub>     | pSB1A3   | pMB1   | Amp |
| pFP.R684  | [ <i>rhaS/P<sub>rhaBAD</sub></i> ]-B0030-NrdJ-1 <sup>C2</sup> .( <i>SEI</i> )mCherry <sup>C</sup> .H <sub>6</sub>     | pSB1A3   | pMB1   | Amp |
| pFP.R520  | [ <i>rhaS/P<sub>rhaBAD</sub></i> ]-B0032-SspGyrB <sup>C2</sup> .( <i>SAK</i> )mCherry <sup>C</sup> .H <sub>6</sub>    | pSB1A3   | pMB1   | Amp |
| pFP.R521  | [ <i>rhaS/P<sub>rhaBAD</sub></i> ]-B0030-Cth-Ter <sup>C2</sup> .( <i>SEL</i> )mCherry <sup>C</sup> .H <sub>6</sub>    | pSB1A3   | pMB1   | Amp |
| pFP.R523  | [ <i>rhaS/P<sub>rhaBAD</sub></i> ]-B0030-Mja-Klba <sup>C2</sup> .( <i>CSG</i> )mCherry <sup>C</sup> .H <sub>6</sub>   | pSB1A3   | pMB1   | Amp |
| pFP.R685  | [ <i>rhaS/P<sub>rhaBAD</sub></i> ]-B0032-gp41-1 <sup>C2</sup> .( <i>SSS</i> )mCherry <sup>C</sup> .H <sub>6</sub>     | pSB1A3   | pMB1   | Amp |
| pFP.R688  | [ <i>rhaS/P<sub>rhaBAD</sub></i> ]-B0032-NrdJ-1 <sup>C2</sup> .( <i>SEI</i> )mCherry <sup>C</sup> .H <sub>6</sub>     | pSB1A3   | pMB1   | Amp |
| pFP.R686  | [ <i>rhaS/P<sub>rhaBAD</sub></i> ]-B0032-Cth-Ter <sup>C2</sup> .( <i>SEL</i> )mCherry <sup>C</sup> .H <sub>6</sub>    | pSB1A3   | pMB1   | Amp |
| pFP.E98   | [ <i>araC/P<sub>araBAD</sub></i> ]-B0033-ecf16 <sup>N</sup>                                                           | pSB3T5   | p15A   | Tet |
| pFP.E36   | [ <i>araC/P<sub>araBAD</sub></i> ]-B0030-ecf17 <sup>N</sup>                                                           | pSB3T5   | p15A   | Tet |
| pFP.E99   | [ <i>araC/P<sub>araBAD</sub></i> ]-B0033-ecf20 <sup>N</sup>                                                           | pSB3T5   | p15A   | Tet |
| pFP.E61   | [ <i>rhaS/P<sub>rhaBAD</sub></i> ]-B0030-ecf16 <sup>C</sup>                                                           | pSEVA221 | RK2    | Kan |
| pFP.E62   | [ <i>rhaS/P<sub>rhaBAD</sub></i> ]-B0030-ecf17 <sup>C</sup>                                                           | pSEVA221 | RK2    | Kan |
| pFP.E63   | [ <i>rhaS/P<sub>rhaBAD</sub></i> ]-B0030-ecf20 <sup>C</sup>                                                           | pSEVA221 | RK2    | Kan |
| pFP.P16   | P <sub>16</sub> -B0030-gfp-B0015                                                                                      | pSB4A3   | pSC101 | Amp |
| pFP.P17   | P <sub>17</sub> -B0030-gfp-B0015                                                                                      | pSB4A3   | pSC101 | Amp |
| pFP.P20   | P <sub>20</sub> -B0030-gfp-B0015                                                                                      | pSB4A3   | pSC101 | Amp |
| pFP.E78   | [ <i>araC/P<sub>araBAD</sub></i> ]-B0033-ecf16                                                                        | pSB3T5   | p15A   | Tet |
| pFP.E274  | [ <i>araC/P<sub>araBAD</sub></i> ]-B0033-ecf16 <sup>N</sup> (VDASDL)ecf16 <sup>C</sup>                                | pSB3T5   | p15A   | Tet |
| pFP.E276  | [ <i>araC/P<sub>araBAD</sub></i> ]-B0033-ecf16 <sup>N</sup> (SGYSS)ecf16 <sup>C</sup>                                 | pSB3T5   | p15A   | Tet |
| pFP.E277  | [ <i>araC/P<sub>araBAD</sub></i> ]-B0033-ecf16 <sup>N</sup> (LNRSAV)ecf16 <sup>C</sup>                                | pSB3T5   | p15A   | Tet |
| pFP.E155  | [ <i>araC/P<sub>araBAD</sub></i> ]-B0033-ecf16 <sup>N</sup> (NPCSE)ecf16 <sup>C</sup>                                 | pSB3T5   | p15A   | Tet |
| pFP.E164  | [ <i>araC/P<sub>araBAD</sub></i> ]-B0033-ecf16 <sup>N</sup> (AGGSAK)ecf16 <sup>C</sup>                                | pSB3T5   | p15A   | Tet |
| pFP.E283  | [ <i>araC/P<sub>araBAD</sub></i> ]-B0033-ecf16 <sup>N</sup> (NGKSEL)ecf16 <sup>C</sup>                                | pSB3T5   | p15A   | Tet |
| pFP.E181  | [ <i>araC/P<sub>araBAD</sub></i> ]-B0033-ecf16 <sup>N</sup> (HDGCSG)ecf16 <sup>C</sup>                                | pSB3T5   | p15A   | Tet |
| pFP.ECF17 | [ <i>araC/P<sub>araBAD</sub></i> ]-B0030-ecf17                                                                        | pSB3T5   | p15A   | Tet |
| pFP.E291  | [ <i>araC/P<sub>araBAD</sub></i> ]-B0030-ecf17 <sup>N</sup> (VDASDL)ecf17 <sup>C</sup>                                | pSB3T5   | p15A   | Tet |



|              |                                                                                                                                                                                                                                                                                                                                                                                                                                                                                                                                                                                                                                        |          |        |     |
|--------------|----------------------------------------------------------------------------------------------------------------------------------------------------------------------------------------------------------------------------------------------------------------------------------------------------------------------------------------------------------------------------------------------------------------------------------------------------------------------------------------------------------------------------------------------------------------------------------------------------------------------------------------|----------|--------|-----|
| pFP.E293     | [ <i>araC/P<sub>araBAD</sub></i> ]-B0030- <i>ecf17<sup>N</sup></i> (SGYSSS) <i>ecf17<sup>C</sup></i>                                                                                                                                                                                                                                                                                                                                                                                                                                                                                                                                   | pSB3T5   | p15A   | Tet |
| pFP.E294     | [ <i>araC/P<sub>araBAD</sub></i> ]-B0030- <i>ecf17<sup>N</sup></i> (LNRSAV) <i>ecf17<sup>C</sup></i>                                                                                                                                                                                                                                                                                                                                                                                                                                                                                                                                   | pSB3T5   | p15A   | Tet |
| pFP.E156     | [ <i>araC/P<sub>araBAD</sub></i> ]-B0030- <i>ecf17<sup>N</sup></i> (NPCSEI) <i>ecf17<sup>C</sup></i>                                                                                                                                                                                                                                                                                                                                                                                                                                                                                                                                   | pSB3T5   | p15A   | Tet |
| pFP.E165     | [ <i>araC/P<sub>araBAD</sub></i> ]-B0030- <i>ecf17<sup>N</sup></i> (AGGSAK) <i>ecf17<sup>C</sup></i>                                                                                                                                                                                                                                                                                                                                                                                                                                                                                                                                   | pSB3T5   | p15A   | Tet |
| pFP.E300     | [ <i>araC/P<sub>araBAD</sub></i> ]-B0030- <i>ecf17<sup>N</sup></i> (NGKSEL) <i>ecf17<sup>C</sup></i>                                                                                                                                                                                                                                                                                                                                                                                                                                                                                                                                   | pSB3T5   | p15A   | Tet |
| pFP.E214     | [ <i>araC/P<sub>araBAD</sub></i> ]-B0030- <i>ecf17<sup>N</sup></i> (HDGCSG) <i>ecf17<sup>C</sup></i>                                                                                                                                                                                                                                                                                                                                                                                                                                                                                                                                   | pSB3T5   | p15A   | Tet |
| pFP.E80      | [ <i>araC/P<sub>araBAD</sub></i> ]-B0033- <i>ecf20</i>                                                                                                                                                                                                                                                                                                                                                                                                                                                                                                                                                                                 | pSB3T5   | p15A   | Tet |
| pFP.E87      | <i>araC/P<sub>araBAD</sub></i> -B0033- <i>ecf20<sup>N</sup></i> (VDASDL) <i>ecf20<sup>C</sup></i>                                                                                                                                                                                                                                                                                                                                                                                                                                                                                                                                      | pSB3T5   | p15A   | Tet |
| pFP.E89      | <i>araC/P<sub>araBAD</sub></i> -B0033- <i>ecf20<sup>N</sup></i> (SGYSSS) <i>ecf20<sup>C</sup></i>                                                                                                                                                                                                                                                                                                                                                                                                                                                                                                                                      | pSB3T5   | p15A   | Tet |
| pFP.E90      | <i>araC/P<sub>araBAD</sub></i> -B0033- <i>ecf20<sup>N</sup></i> (LNRSAV) <i>ecf20<sup>C</sup></i>                                                                                                                                                                                                                                                                                                                                                                                                                                                                                                                                      | pSB3T5   | p15A   | Tet |
| pFP.E91      | <i>araC/P<sub>araBAD</sub></i> -B0033- <i>ecf20<sup>N</sup></i> (NPCSEI) <i>ecf20<sup>C</sup></i>                                                                                                                                                                                                                                                                                                                                                                                                                                                                                                                                      | pSB3T5   | p15A   | Tet |
| pFP.E94      | <i>araC/P<sub>araBAD</sub></i> -B0033- <i>ecf20<sup>N</sup></i> (AGGSAK) <i>ecf20<sup>C</sup></i>                                                                                                                                                                                                                                                                                                                                                                                                                                                                                                                                      | pSB3T5   | p15A   | Tet |
| pFP.E230     | <i>araC/P<sub>araBAD</sub></i> -B0033- <i>ecf20<sup>N</sup></i> (NGKSEL) <i>ecf20<sup>C</sup></i>                                                                                                                                                                                                                                                                                                                                                                                                                                                                                                                                      | pSB3T5   | p15A   | Tet |
| pFP.E182     | <i>araC/P<sub>araBAD</sub></i> -B0033- <i>ecf20<sup>N</sup></i> (HDGCSG) <i>ecf20<sup>C</sup></i>                                                                                                                                                                                                                                                                                                                                                                                                                                                                                                                                      | pSB3T5   | p15A   | Tet |
| pFP.E199     | P <sub>16</sub> -B0030- <i>mCherry</i> -B0015                                                                                                                                                                                                                                                                                                                                                                                                                                                                                                                                                                                          | pSB3T5   | p15A   | Tet |
| pFP.E200     | P <sub>17</sub> -B0030- <i>bfp</i> -B0015                                                                                                                                                                                                                                                                                                                                                                                                                                                                                                                                                                                              | pSB1A3   | pMB1   | Amp |
| pFP.E216     | P <sub>16</sub> -B0030- <i>mCherry</i> -B0015-P <sub>17</sub> -B0030- <i>bfp</i> -B0015-P <sub>20</sub> -B0030- <i>gfp</i> -B0015                                                                                                                                                                                                                                                                                                                                                                                                                                                                                                      | pSB4A3   | pSC101 | Amp |
| pFP.E227     | i[P <sub>16</sub> -B0030- <i>mCherry</i> ]-B0015-P <sub>17</sub> -B0030- <i>bfp</i> -B0015-P <sub>20</sub> -B0030- <i>gfp</i> -B0015                                                                                                                                                                                                                                                                                                                                                                                                                                                                                                   | pSB4A3   | pSC101 | Amp |
| pFP.E195     | [ <i>araC/P<sub>araBAD</sub></i> ]-B0033- <i>ecf16<sup>N</sup></i> (AGG). <i>SspGyrB<sup>N2</sup></i>                                                                                                                                                                                                                                                                                                                                                                                                                                                                                                                                  | pSB3T5   | p15A   | Tet |
| pFP.E196     | [ <i>rhaS/P<sub>rhaBAD</sub></i> ]-B0032- <i>SspGyrB<sup>C2</sup></i> .( <i>SAK</i> ) <i>ecf16<sup>C</sup></i>                                                                                                                                                                                                                                                                                                                                                                                                                                                                                                                         | pSEVA221 | RK2    | Kan |
| pFP.E197     | [ <i>araC/P<sub>araBAD</sub></i> ]-B0030- <i>ecf17<sup>N</sup></i> (NPC). <i>NrdJ-1<sup>N2</sup></i>                                                                                                                                                                                                                                                                                                                                                                                                                                                                                                                                   | pSB3T5   | p15A   | Tet |
| pFP.E223     | [ <i>rhaS/P<sub>rhaBAD</sub></i> ]-B0032- <i>NrdJ-1<sup>C2</sup></i> .( <i>SEI</i> ) <i>ecf17<sup>C</sup></i>                                                                                                                                                                                                                                                                                                                                                                                                                                                                                                                          | pSEVA221 | RK2    | Kan |
| pFP.E124     | [ <i>araC/P<sub>araBAD</sub></i> ]-B0033- <i>ecf20<sup>N</sup></i> (VDA). <i>M86<sup>N2</sup></i>                                                                                                                                                                                                                                                                                                                                                                                                                                                                                                                                      | pSB3T5   | p15A   | Tet |
| pFP.E144     | [ <i>rhaS/P<sub>rhaBAD</sub></i> ]-B0032- <i>M86<sup>C2</sup></i> .( <i>SDL</i> ) <i>ecf20<sup>C</sup></i>                                                                                                                                                                                                                                                                                                                                                                                                                                                                                                                             | pSEVA221 | RK2    | Kan |
| pFP.E609     | [ <i>araC/P<sub>araBAD</sub></i> ]-B0033- <i>ecf16<sup>N</sup></i> (AGG). <i>SspGyrB<sup>N2</sup></i> (C>A)                                                                                                                                                                                                                                                                                                                                                                                                                                                                                                                            | pSB3T5   | p15A   | Tet |
| pFP.E610     | [ <i>rhaS/P<sub>rhaBAD</sub></i> ]-B0032- <i>SspGyrB<sup>C2</sup></i> (N>A).( <i>SAK</i> ) <i>ecf16<sup>C</sup></i>                                                                                                                                                                                                                                                                                                                                                                                                                                                                                                                    | pSEVA221 | RK2    | Kan |
| pFP.E611     | [ <i>araC/P<sub>araBAD</sub></i> ]-B0030- <i>ecf17<sup>N</sup></i> (NPC). <i>NrdJ-1<sup>N2</sup></i> (C>A)                                                                                                                                                                                                                                                                                                                                                                                                                                                                                                                             | pSB3T5   | p15A   | Tet |
| pFP.E612     | [ <i>rhaS/P<sub>rhaBAD</sub></i> ]-B0032- <i>NrdJ-1<sup>C2</sup></i> (N>A).( <i>SEI</i> ) <i>ecf17<sup>C</sup></i>                                                                                                                                                                                                                                                                                                                                                                                                                                                                                                                     | pSEVA221 | RK2    | Kan |
| pFP.E613     | [ <i>araC/P<sub>araBAD</sub></i> ]-B0033- <i>ecf20<sup>N</sup></i> (VDA). <i>M86<sup>N2</sup></i> (C>A)                                                                                                                                                                                                                                                                                                                                                                                                                                                                                                                                | pSB3T5   | p15A   | Tet |
| pFP.E614     | [ <i>rhaS/P<sub>rhaBAD</sub></i> ]-B0032- <i>M86<sup>C2</sup></i> (N>A).( <i>SDL</i> ) <i>ecf20<sup>C</sup></i>                                                                                                                                                                                                                                                                                                                                                                                                                                                                                                                        | pSEVA221 | RK2    | Kan |
| pFP.E211     | [ <i>araC/P<sub>araBAD</sub></i> ]-B0033- <i>ecf20<sup>N</sup></i> (VDA). <i>M86<sup>N2</sup></i> -L3S2P21-P <sub>araBAD</sub> -B0032- <i>SspGyrB<sup>C2</sup></i> .( <i>SAK</i> ) <i>ecf16<sup>C</sup></i>                                                                                                                                                                                                                                                                                                                                                                                                                            | pSB3T5   | p15A   | Tet |
| pFP.B15-E212 | B0015-[ <i>rhaS/P<sub>rhaBAD</sub></i> ]-B0030- <i>ecf17<sup>N</sup></i> (NPC). <i>NrdJ-1<sup>N2</sup></i> -ECK120033737-P <sub>rhaBAD</sub> -B0032- <i>M86<sup>C2</sup></i> .( <i>SDL</i> ) <i>ecf20<sup>C</sup></i>                                                                                                                                                                                                                                                                                                                                                                                                                  | pSB1A3   | pMB1   | Amp |
| pFP.E220     | B0015-[ <i>luxR/P<sub>lux2</sub></i> ]-B0033- <i>ecf16<sup>N</sup></i> (AGG). <i>SspGyrB<sup>N2</sup></i> -L3S2P21-P <sub>lux2</sub> -B0033- <i>NrdJ-1<sup>C2</sup></i> .( <i>SEI</i> ) <i>ecf17<sup>C</sup></i>                                                                                                                                                                                                                                                                                                                                                                                                                       | pSB3K3   | p15A   | Kan |
| pFP.E222     | [ <i>araC/P<sub>araBAD</sub></i> ]-B0033- <i>ecf20<sup>N</sup></i> (VDA). <i>M86<sup>N2</sup></i> -L3S2P21-P <sub>araBAD</sub> -B0032- <i>SspGyrB<sup>C2</sup></i> .( <i>SAK</i> ) <i>ecf16<sup>C</sup></i> -B0015-[ <i>rhaS/P<sub>rhaBAD</sub></i> ]-B0030- <i>ecf17<sup>N</sup></i> (NPC). <i>NrdJ-1<sup>N2</sup></i> -ECK120033737-P <sub>rhaBAD</sub> -B0032- <i>M86<sup>C2</sup></i> . <i>ecf20<sup>C</sup></i> -B0015-[ <i>luxR/P<sub>lux2</sub></i> ]-B0033- <i>ecf16<sup>N</sup></i> (AGG). <i>SspGyrB<sup>N2</sup></i> -L3S2P21-P <sub>lux2</sub> -B0033- <i>NrdJ-1<sup>C2</sup></i> .( <i>SEI</i> ) <i>ecf17<sup>C</sup></i> | pSB3K3   | p15A   | Kan |
| pET.SasG3    | [ <i>lacI/P<sub>T7.lacO</sub></i> ]-B0030-H <sub>6</sub> . <i>sasG5<sup>3</sup>E<sup>2</sup></i>                                                                                                                                                                                                                                                                                                                                                                                                                                                                                                                                       | pET11    | pBR322 | Amp |
| pET.SasG6_J  | [ <i>lacI/P<sub>T7.lacO</sub></i> ]-B0030-H <sub>6</sub> . <i>sasG5<sup>6</sup>E<sup>4</sup></i>                                                                                                                                                                                                                                                                                                                                                                                                                                                                                                                                       | pET11    | pBR322 | Amp |
| pET.SasG9_J  | [ <i>lacI/P<sub>T7.lacO</sub></i> ]-B0030-H <sub>6</sub> . <i>sasG5<sup>9</sup>E<sup>6</sup></i>                                                                                                                                                                                                                                                                                                                                                                                                                                                                                                                                       | pET11    | pBR322 | Amp |
| pET.SasG12_J | [ <i>lacI/P<sub>T7.lacO</sub></i> ]-B0030-H <sub>6</sub> . <i>sasG5<sup>12</sup>E<sup>8</sup></i>                                                                                                                                                                                                                                                                                                                                                                                                                                                                                                                                      | pET11    | pBR322 | Amp |
| pET.SasG3_1  | [ <i>lacI/P<sub>T7.lacO</sub></i> ]-B0030- <i>Strep.sasG5<sup>3</sup>E<sup>2</sup></i> . <i>NrdJ-1<sup>N2</sup></i>                                                                                                                                                                                                                                                                                                                                                                                                                                                                                                                    | pET11    | pBR322 | Amp |
| pET.SasG3_2  | [ <i>lacI/P<sub>T7.lacO</sub></i> ]-B0030- <i>NrdJ-1<sup>C2</sup></i> . <i>sasG5<sup>3</sup>E<sup>2</sup></i> . <i>gp41-1<sup>N2</sup></i>                                                                                                                                                                                                                                                                                                                                                                                                                                                                                             | pET11    | pBR322 | Amp |
| pET.SasG3_3  | [ <i>lacI/P<sub>T7.lacO</sub></i> ]-B0030- <i>gp41-1<sup>C2</sup></i> . <i>sasG5<sup>3</sup>E<sup>2</sup></i> . <i>IMPDH-1<sup>N2</sup></i>                                                                                                                                                                                                                                                                                                                                                                                                                                                                                            | pET11    | pBR322 | Amp |
| pET.SasG3_4  | [ <i>lacI/P<sub>T7.lacO</sub></i> ]-B0030-ST. <i>IMPDH-1<sup>C2</sup></i> . <i>sasG5<sup>3</sup>E<sup>2</sup></i> . <i>SspGyrB<sup>N2</sup></i>                                                                                                                                                                                                                                                                                                                                                                                                                                                                                        | pET11    | pBR322 | Amp |
| pET.SasG3_5  | [ <i>lacI/P<sub>T7.lacO</sub></i> ]-B0030- <i>SspGyrB<sup>C2</sup></i> . <i>sasG5<sup>3</sup>E<sup>2</sup></i> . <i>gp41-8<sup>N2</sup></i>                                                                                                                                                                                                                                                                                                                                                                                                                                                                                            | pET11    | pBR322 | Amp |
| pET.SasG3_6  | [ <i>lacI/P<sub>T7.lacO</sub></i> ]-B0030- <i>gp41-8<sup>C2</sup></i> . <i>sasG5<sup>3</sup>E<sup>2</sup></i> .H <sub>6</sub>                                                                                                                                                                                                                                                                                                                                                                                                                                                                                                          | pET11    | pBR322 | Amp |
| pET.SasG3_7  | [ <i>lacI/P<sub>T7.lacO</sub></i> ]-B0030- <i>gp41-1<sup>C2</sup></i> . <i>sasG5<sup>3</sup>E<sup>2</sup></i> . <i>NrdJ-1<sup>N2</sup></i>                                                                                                                                                                                                                                                                                                                                                                                                                                                                                             | pET11    | pBR322 | Amp |
| pET.SasG3_8  | [ <i>lacI/P<sub>T7.lacO</sub></i> ]-B0030- <i>NrdJ-1<sup>C2</sup></i> . <i>sasG5<sup>3</sup>E<sup>2</sup></i> .H <sub>6</sub>                                                                                                                                                                                                                                                                                                                                                                                                                                                                                                          | pET11    | pBR322 | Amp |

<sup>a</sup>\* - intein segment with flexible linker at the canonical split site; ST - solubility/expressivity tag; H<sub>6</sub>- hexahistidine tag; Strep- strep tag; i - reverse orientation.

<sup>b</sup> Tet - Tetracycline; Amp - Ampicillin; Kan - Kanamycin.

**Supplementary Table 9 | Theoretical molecular weights of proteins analyzed by SDS-PAGE and Western blots**

| <b>Inteins related proteins</b>                                   |                        |                                                                                   |                        |
|-------------------------------------------------------------------|------------------------|-----------------------------------------------------------------------------------|------------------------|
| <b>mCherry controls</b>                                           |                        | <b>mCherry with intein insertions <i>in cis</i></b>                               |                        |
| Protein name <sup>a</sup>                                         | Molecular weight (kDa) | Protein name <sup>a</sup>                                                         | Molecular weight (kDa) |
| mCherry-H <sub>6</sub>                                            | 27.5                   |                                                                                   |                        |
| mCherry <sup>N</sup> (VDASDL)mCherry <sup>C</sup> -H <sub>6</sub> | 28.1                   | mCherry <sup>N</sup> (VDA).M86.(SDL)mCherry <sup>C</sup> -H <sub>6</sub>          | 45.5                   |
| mCherry <sup>N</sup> (GGKCVN)mCherry <sup>C</sup> -H <sub>6</sub> | 28.2                   | mCherry <sup>N</sup> (GGK).NpuSsp.(CWN)mCherry <sup>C</sup> -H <sub>6</sub>       | 43.9                   |
|                                                                   |                        | mCherry <sup>N</sup> (GGK).NpuSsp*. (CWN)mCherry <sup>C</sup> -H <sub>6</sub>     | 44.5                   |
| mCherry <sup>N</sup> (SGYSSS)mCherry <sup>C</sup> -H <sub>6</sub> | 28.1                   | mCherry <sup>N</sup> (SGY).gp41-1.(SSS)mCherry <sup>C</sup> -H <sub>6</sub>       | 42.3                   |
| mCherry <sup>N</sup> (LNRSAV)mCherry <sup>C</sup> -H <sub>6</sub> | 28.2                   | mCherry <sup>N</sup> (LNR).gp41-8.(SAV)mCherry <sup>C</sup> -H <sub>6</sub>       | 43.2                   |
| mCherry <sup>N</sup> (NPCSEI)mCherry <sup>C</sup> -H <sub>6</sub> | 28.2                   | mCherry <sup>N</sup> (NPC).NrdJ-1.(SEI)mCherry <sup>C</sup> -H <sub>6</sub>       | 44.6                   |
| mCherry <sup>N</sup> (GGGSIC)mCherry <sup>C</sup> -H <sub>6</sub> | 28.0                   | mCherry <sup>N</sup> (GGG).IMPDPH-1.(SIC)mCherry <sup>C</sup> -H <sub>6</sub>     | 44.4                   |
| mCherry <sup>N</sup> (IDECHE)mCherry <sup>C</sup> -H <sub>6</sub> | 28.2                   | mCherry <sup>N</sup> (IDE).SspDnaX.(CHE)mCherry <sup>C</sup> -H <sub>6</sub>      | 43.6                   |
| mCherry <sup>N</sup> (AGGSAS)mCherry <sup>C</sup> -H <sub>6</sub> | 28.0                   | mCherry <sup>N</sup> (AGG).SspGyrB.(SAS)mCherry <sup>C</sup> -H <sub>6</sub>      | 45.5                   |
| mCherry <sup>N</sup> (IGCSFD)mCherry <sup>C</sup> -H <sub>6</sub> | 28.2                   | mCherry <sup>N</sup> (IGC).TerThyX.(SFD)mCherry <sup>C</sup> -H <sub>6</sub>      | 47.3                   |
|                                                                   |                        | mCherry <sup>N</sup> (IGC).TerThyX*. (SFD)mCherry <sup>C</sup> -H <sub>6</sub>    | 48.0                   |
| mCherry <sup>N</sup> (GSKTVI)mCherry <sup>C</sup> -H <sub>6</sub> | 28.1                   | mCherry <sup>N</sup> (GSK).TvoVMA.(TVI)mCherry <sup>C</sup> -H <sub>6</sub>       | 48.7                   |
| mCherry <sup>N</sup> (SGKTQL)mCherry <sup>C</sup> -H <sub>6</sub> | 28.2                   | mCherry <sup>N</sup> (SGK).PhoRadA.(TQL)mCherry <sup>C</sup> -H <sub>6</sub>      | 47.9                   |
| mCherry <sup>N</sup> (VNQSGR)mCherry <sup>C</sup> -H <sub>6</sub> | 28.2                   | mCherry <sup>N</sup> (VNQ).Cro-RIR1*. (SGR)mCherry <sup>C</sup> -H <sub>6</sub>   | 46.6                   |
| mCherry <sup>N</sup> (DKFSTK)mCherry <sup>C</sup> -H <sub>6</sub> | 28.2                   | mCherry <sup>N</sup> (DKF).Cro-RPB2*. (STK)mCherry <sup>C</sup> -H <sub>6</sub>   | 46.0                   |
| mCherry <sup>N</sup> (GSKCSN)mCherry <sup>C</sup> -H <sub>6</sub> | 28.1                   | mCherry <sup>N</sup> (GSK).Cro-Top2*. (CSN)mCherry <sup>C</sup> -H <sub>6</sub>   | 47.2                   |
| mCherry <sup>N</sup> (SNLCSE)mCherry <sup>C</sup> -H <sub>6</sub> | 28.2                   | mCherry <sup>N</sup> (SNL).CIV-RIR1*. (CSE)mCherry <sup>C</sup> -H <sub>6</sub>   | 45.7                   |
|                                                                   |                        | mCherry <sup>N</sup> (SNL).BsuP-RIR1*. (CSE)mCherry <sup>C</sup> -H <sub>6</sub>  | 45.6                   |
| mCherry <sup>N</sup> (KHHSVL)mCherry <sup>C</sup> -H <sub>6</sub> | 28.2                   | mCherry <sup>N</sup> (KHH).CP-Thy1*. (SVL)mCherry <sup>C</sup> -H <sub>6</sub>    | 45.5                   |
| mCherry <sup>N</sup> (HGKSEL)mCherry <sup>C</sup> -H <sub>6</sub> | 28.2                   | mCherry <sup>N</sup> (HGK).Ama-Ter*. (SEL)mCherry <sup>C</sup> -H <sub>6</sub>    | 46.1                   |
| mCherry <sup>N</sup> (ASCCRL)mCherry <sup>C</sup> -H <sub>6</sub> | 28.2                   | mCherry <sup>N</sup> (ASC).CbP-RNR*. (CRL)mCherry <sup>C</sup> -H <sub>6</sub>    | 46.6                   |
| mCherry <sup>N</sup> (NGKTTL)mCherry <sup>C</sup> -H <sub>6</sub> | 28.2                   | mCherry <sup>N</sup> (NGK).Ckl-Ter*. (TTL)mCherry <sup>C</sup> -H <sub>6</sub>    | 48.6                   |
| mCherry <sup>N</sup> (NGKSEL)mCherry <sup>C</sup> -H <sub>6</sub> | 28.2                   | mCherry <sup>N</sup> (NGK).Cth-Ter*. (SEL)mCherry <sup>C</sup> -H <sub>6</sub>    | 46.0                   |
| mCherry <sup>N</sup> (HGKTEV)mCherry <sup>C</sup> -H <sub>6</sub> | 28.2                   | mCherry <sup>N</sup> (HGK).EP-Pri*. (TEV)mCherry <sup>C</sup> -H <sub>6</sub>     | 45.4                   |
| mCherry <sup>N</sup> (AKACNF)mCherry <sup>C</sup> -H <sub>6</sub> | 28.2                   | mCherry <sup>N</sup> (AKA).LLP-Pol*. (CNF)mCherry <sup>C</sup> -H <sub>6</sub>    | 46.8                   |
| mCherry <sup>N</sup> (ATGCGK)mCherry <sup>C</sup> -H <sub>6</sub> | 28.1                   | mCherry <sup>N</sup> (ATG).LP-Hel*. (CGK)mCherry <sup>C</sup> -H <sub>6</sub>     | 45.1                   |
| mCherry <sup>N</sup> (QDQTKR)mCherry <sup>C</sup> -H <sub>6</sub> | 28.2                   | mCherry <sup>N</sup> (QDQ).MP-B-DnaB*. (TKN)mCherry <sup>C</sup> -H <sub>6</sub>  | 45.4                   |
| mCherry <sup>N</sup> (NHDSRA)mCherry <sup>C</sup> -H <sub>6</sub> | 28.2                   | mCherry <sup>N</sup> (NHD).MP-K-gp53*. (SRA)mCherry <sup>C</sup> -H <sub>6</sub>  | 44.7                   |
| mCherry <sup>N</sup> (ELKTQN)mCherry <sup>C</sup> -H <sub>6</sub> | 28.2                   | mCherry <sup>N</sup> (ELK).MP-C-gp206*. (TQN)mCherry <sup>C</sup> -H <sub>6</sub> | 45.1                   |
| mCherry <sup>N</sup> (NGKTEL)mCherry <sup>C</sup> -H <sub>6</sub> | 28.2                   | mCherry <sup>N</sup> (NGK).MP-M-DnaB*. (TEL)mCherry <sup>C</sup> -H <sub>6</sub>  | 45.0                   |
| mCherry <sup>N</sup> (AGKSLT)mCherry <sup>C</sup> -H <sub>6</sub> | 28.1                   | mCherry <sup>N</sup> (AGK).PP-Phi*. (SLT)mCherry <sup>C</sup> -H <sub>6</sub>     | 47.0                   |
| mCherry <sup>N</sup> (GKACEL)mCherry <sup>C</sup> -H <sub>6</sub> | 28.1                   | mCherry <sup>N</sup> (GKA).SaP-dpol*. (CEL)mCherry <sup>C</sup> -H <sub>6</sub>   | 46.0                   |
| mCherry <sup>N</sup> (SGKTSS)mCherry <sup>C</sup> -H <sub>6</sub> | 28.1                   | mCherry <sup>N</sup> (SGK).SaP-Hel*. (TSS)mCherry <sup>C</sup> -H <sub>6</sub>    | 46.1                   |
| mCherry <sup>N</sup> (SNLCNE)mCherry <sup>C</sup> -H <sub>6</sub> | 28.2                   | mCherry <sup>N</sup> (SNL).NrdA-2*. (CNE)mCherry <sup>C</sup> -H <sub>6</sub>     | 44.6                   |
| mCherry <sup>N</sup> (GGGTGL)mCherry <sup>C</sup> -H <sub>6</sub> | 28.0                   | mCherry <sup>N</sup> (GGG).Pfu-RIR1-1*. (TGL)mCherry <sup>C</sup> -H <sub>6</sub> | 48.7                   |
| mCherry <sup>N</sup> (HDGCSG)mCherry <sup>C</sup> -H <sub>6</sub> | 28.1                   | mCherry <sup>N</sup> (HDG).Mja-KIbA*. (CSG)mCherry <sup>C</sup> -H <sub>6</sub>   | 48.2                   |
| <b>Split Inteins related proteins</b>                             |                        |                                                                                   |                        |
| <b>N-terminal</b>                                                 |                        | <b>C-terminal</b>                                                                 |                        |
| Protein name <sup>a</sup>                                         | Molecular weight (kDa) | Protein name <sup>a</sup>                                                         | Molecular weight (kDa) |
| mCherry <sup>N</sup>                                              | 18.0                   | mCherry <sup>C</sup> -H <sub>6</sub>                                              | 9.7                    |
| mCherry <sup>N</sup> (SGY)                                        | 18.3                   | (SSS)mCherry <sup>C</sup> -H <sub>6</sub>                                         | 9.9                    |
|                                                                   |                        |                                                                                   |                        |
| mCherry <sup>N</sup> (VDA).M86 <sup>N1</sup>                      | 19.6                   | M86 <sup>C1</sup> .(SDL)mCherry <sup>C</sup> -H <sub>6</sub>                      | 26.0                   |
| mCherry <sup>N</sup> (GGK).NpuSsp <sup>N1</sup>                   | 19.8                   | NpuSsp <sup>C1</sup> .(CWN)mCherry <sup>C</sup> -H <sub>6</sub>                   | 24.3                   |
|                                                                   |                        | NpuSsp <sup>C1</sup> *. (CWN)mCherry <sup>C</sup> -H <sub>6</sub>                 | 24.8                   |
| mCherry <sup>N</sup> (SGY).gp41-1 <sup>N1</sup>                   | 19.7                   | gp41-1 <sup>C1</sup> .(SSS)mCherry <sup>C</sup> -H <sub>6</sub>                   | 22.7                   |
| mCherry <sup>N</sup> (LNR).gp41-8 <sup>N1</sup>                   | 19.6                   | gp41-8 <sup>C1</sup> .(SAV)mCherry <sup>C</sup> -H <sub>6</sub>                   | 23.7                   |
| mCherry <sup>N</sup> (NPC).NrdJ-1 <sup>N1</sup>                   | 19.8                   | NrdJ-1 <sup>C1</sup> .(SEI)mCherry <sup>C</sup> -H <sub>6</sub>                   | 25.0                   |
| mCherry <sup>N</sup> (GGG).IMPDPH-1 <sup>N1</sup>                 | 19.5                   | IMPDPH-1 <sup>C1</sup> .(SIC)mCherry <sup>C</sup> -H <sub>6</sub>                 | 25.0                   |
| mCherry <sup>N</sup> (IDE).SspDnaX <sup>N1</sup>                  | 19.7                   | SspDnaX <sup>C1</sup> .(CHE)mCherry <sup>C</sup> -H <sub>6</sub>                  | 24.1                   |
| mCherry <sup>N</sup> (AGG).SspGyrB <sup>N1</sup>                  | 19.4                   | SspGyrB <sup>C1</sup> .(SAS)mCherry <sup>C</sup> -H <sub>6</sub>                  | 26.2                   |
| mCherry <sup>N</sup> (IGC).TerThyX <sup>N1</sup>                  | 19.8                   | TerThyX <sup>C1</sup> .(SFD)mCherry <sup>C</sup> -H <sub>6</sub>                  | 27.6                   |
|                                                                   |                        | TerThyX <sup>C1</sup> *. (SFD)mCherry <sup>C</sup> -H <sub>6</sub>                | 28.3                   |
| mCherry <sup>N</sup> (GSK).TvoVMA <sup>N1</sup>                   | 19.5                   | TvoVMA <sup>C1</sup> .(TVI)mCherry <sup>C</sup> -H <sub>6</sub>                   | 29.3                   |
| mCherry <sup>N</sup> (SGK).PhoRadA <sup>N1</sup>                  | 19.9                   | PhoRadA <sup>C1</sup> .(TQL)mCherry <sup>C</sup> -H <sub>6</sub>                  | 28.1                   |

|                                                     |      |                                                                      |      |
|-----------------------------------------------------|------|----------------------------------------------------------------------|------|
| mCherry <sup>N</sup> (HGK).Ama-Ter <sup>N1</sup>    | 19.7 | Ama-Ter <sup>C1*</sup> .(SEL)mCherry <sup>C</sup> -H <sub>6</sub>    | 26.6 |
| mCherry <sup>N</sup> (NGK).Cth-Ter <sup>N1</sup>    | 19.6 | Cth-Ter <sup>C1*</sup> .(SEL)mCherry <sup>C</sup> -H <sub>6</sub>    | 26.5 |
| mCherry <sup>N</sup> (AKA).LLP-Pol <sup>N1</sup>    | 19.6 | LLP-Pol <sup>C1*</sup> .(CNF)mCherry <sup>C</sup> -H <sub>6</sub>    | 27.3 |
| mCherry <sup>N</sup> (ATG).LP-Hel <sup>N1</sup>     | 19.6 | LP-Hel <sup>C1*</sup> .(CGK)mCherry <sup>C</sup> -H <sub>6</sub>     | 25.7 |
| mCherry <sup>N</sup> (QDQ).MP-B-DnaB <sup>N1</sup>  | 19.6 | MP-B-DnaB <sup>C1*</sup> .(TKN)mCherry <sup>C</sup> -H <sub>6</sub>  | 25.9 |
| mCherry <sup>N</sup> (NGK).MP-M-DnaB <sup>N1</sup>  | 19.6 | MP-M-DnaB <sup>C1*</sup> .(TEL)mCherry <sup>C</sup> -H <sub>6</sub>  | 25.6 |
| mCherry <sup>N</sup> (GKA).SaP-dpol <sup>N1</sup>   | 19.6 | SaP-dpol <sup>C1*</sup> .(CEL)mCherry <sup>C</sup> -H <sub>6</sub>   | 26.4 |
| mCherry <sup>N</sup> (SNL).NrdA-2 <sup>N1</sup>     | 19.6 | NrdA-2 <sup>C1*</sup> .(CNE)mCherry <sup>C</sup> -H <sub>6</sub>     | 25.1 |
| mCherry <sup>N</sup> (HDG).Mja-KIbA <sup>N1</sup>   | 19.7 | Mja-KIbA <sup>C1*</sup> .(CSG)mCherry <sup>C</sup> -H <sub>6</sub>   | 28.7 |
| mCherry <sup>N</sup> (VDA).M86 <sup>N2</sup>        | 29.6 | M86 <sup>C2</sup> .(SDL)mCherry <sup>C</sup> -H <sub>6</sub>         | 16.0 |
| mCherry <sup>N</sup> (GGK).NpuSsp <sup>N2</sup>     | 30.1 | NpuSsp <sup>C2</sup> .(CWN)mCherry <sup>C</sup> -H <sub>6</sub>      | 13.9 |
| mCherry <sup>N</sup> (SGY).gp41-1 <sup>N2</sup>     | 28.1 | gp41-1 <sup>C2</sup> .(SSS)mCherry <sup>C</sup> -H <sub>6</sub>      | 14.0 |
| mCherry <sup>N</sup> (LNR).gp41-8 <sup>N2</sup>     | 28.4 | gp41-8 <sup>C2</sup> .(SAV)mCherry <sup>C</sup> -H <sub>6</sub>      | 15.0 |
| mCherry <sup>N</sup> (NPC).NrdJ-1 <sup>N2</sup>     | 30.2 | NrdJ-1 <sup>C2</sup> .(SEI)mCherry <sup>C</sup> -H <sub>6</sub>      | 14.5 |
| mCherry <sup>N</sup> (GGG).IMPDPH-1 <sup>N2</sup>   | 29.9 | ST.IMPDPH-1 <sup>C2</sup> .(SIC)mCherry <sup>C</sup> -H <sub>6</sub> | 15.2 |
| mCherry <sup>N</sup> (IDE).SspDnaX <sup>N2</sup>    | 29.0 | ST.SspDnaX <sup>C2</sup> .(CHT)mCherry <sup>C</sup> -H <sub>6</sub>  | 15.4 |
| mCherry <sup>N</sup> (AGG).SspGyrB <sup>N2</sup>    | 30.8 | SspGyrB <sup>C2</sup> .(SAK)mCherry <sup>C</sup> -H <sub>6</sub>     | 14.8 |
| mCherry <sup>N</sup> (IGC).TerThyX <sup>N2</sup>    | 33.1 | ST.TerThyX <sup>C2</sup> .(SFD)mCherry <sup>C</sup> -H <sub>6</sub>  | 15.0 |
| mCherry <sup>N</sup> (GSK).TvoVMA <sup>N2</sup>     | 33.1 | TvoVMA <sup>C2</sup> .(TVI)mCherry <sup>C</sup> -H <sub>6</sub>      | 15.6 |
| mCherry <sup>N</sup> (SGK).PhoRadA <sup>N2</sup>    | 32.7 | ST.PhoRadA <sup>C2</sup> .(TQL)mCherry <sup>C</sup> -H <sub>6</sub>  | 16.0 |
| mCherry <sup>N</sup> (HGK).Ama-Ter <sup>N2</sup>    | 31.0 | Ama-Ter <sup>C2</sup> .(SEL)mCherry <sup>C</sup> -H <sub>6</sub>     | 14.6 |
| mCherry <sup>N</sup> (NGK).Cth-Ter <sup>N2</sup>    | 30.8 | Cth-Ter <sup>C2</sup> .(SEL)mCherry <sup>C</sup> -H <sub>6</sub>     | 14.6 |
| mCherry <sup>N</sup> (AKA).LLP-Pol <sup>N2</sup>    | 31.9 | LLP-Pol <sup>C2</sup> .(CNF)mCherry <sup>C</sup> -H <sub>6</sub>     | 14.4 |
| mCherry <sup>N</sup> (ATG).LP-Hel <sup>N2</sup>     | 30.3 | LP-Hel <sup>C2</sup> .(CGK)mCherry <sup>C</sup> -H <sub>6</sub>      | 14.2 |
| mCherry <sup>N</sup> (QDQ).MP-B-DnaB <sup>N2</sup>  | 30.3 | MP-B-DnaB <sup>C2</sup> .(TKN)mCherry <sup>C</sup> -H <sub>6</sub>   | 14.6 |
| mCherry <sup>N</sup> (NGK).MP-M-DnaB <sup>N2</sup>  | 30.2 | MP-M-DnaB <sup>C2</sup> .(TEL)mCherry <sup>C</sup> -H <sub>6</sub>   | 14.3 |
| mCherry <sup>N</sup> (GKA).SaP-dpol <sup>N2</sup>   | 31.3 | SaP-dpol <sup>C2</sup> .(CEL)mCherry <sup>C</sup> -H <sub>6</sub>    | 14.1 |
| mCherry <sup>N</sup> (SNL).NrdA-2 <sup>N2</sup>     | 30.2 | NrdA-2 <sup>C2</sup> .(CNE)mCherry <sup>C</sup> -H <sub>6</sub>      | 13.8 |
| mCherry <sup>N</sup> (HDG).Mja-KIbA <sup>N2</sup>   | 33.2 | Mja-KIbA <sup>C2</sup> .(CSG)mCherry <sup>C</sup> -H <sub>6</sub>    | 14.5 |
| mCherry <sup>N</sup> (VDA).M86 <sup>N3</sup>        | 34.1 | M86 <sup>C3</sup> .(SDL)mCherry <sup>C</sup> -H <sub>6</sub>         | 11.5 |
| mCherry <sup>N</sup> (GGK).NpuSsp <sup>N3</sup>     | 32.6 | NpuSsp <sup>C3</sup> .(CWN)mCherry <sup>C</sup> -H <sub>6</sub>      | 11.5 |
| mCherry <sup>N</sup> (GGK).NpuSsp <sup>N3*</sup>    | 33.2 |                                                                      |      |
| mCherry <sup>N</sup> (SGY).gp41-1 <sup>N3</sup>     | 31.0 | gp41-1 <sup>C3</sup> .(SSS)mCherry <sup>C</sup> -H <sub>6</sub>      | 11.5 |
| mCherry <sup>N</sup> (LNR).gp41-8 <sup>N3</sup>     | 31.9 | gp41-8 <sup>C3</sup> .(SAV)mCherry <sup>C</sup> -H <sub>6</sub>      | 11.4 |
| mCherry <sup>N</sup> (NPC).NrdJ-1 <sup>N3</sup>     | 33.3 | NrdJ-1 <sup>C3</sup> .(SEI)mCherry <sup>C</sup> -H <sub>6</sub>      | 11.5 |
| mCherry <sup>N</sup> (GGG).IMPDPH-1 <sup>N3</sup>   | 33.1 | IMPDPH-1 <sup>C3</sup> .(SIC)mCherry <sup>C</sup> -H <sub>6</sub>    | 11.4 |
| mCherry <sup>N</sup> (IDE).SspDnaX <sup>N3</sup>    | 32.3 | SspDnaX <sup>C3</sup> .(CHT)mCherry <sup>C</sup> -H <sub>6</sub>     | 11.4 |
| mCherry <sup>N</sup> (AGG).SspGyrB <sup>N3</sup>    | 34.2 | SspGyrB <sup>C3</sup> .(SAK)mCherry <sup>C</sup> -H <sub>6</sub>     | 11.4 |
| mCherry <sup>N</sup> (IGC).TerThyX <sup>N3</sup>    | 35.9 | TerThyX <sup>C3</sup> .(SFD)mCherry <sup>C</sup> -H <sub>6</sub>     | 11.6 |
| mCherry <sup>N</sup> (IGC).TerThyX <sup>N3*</sup>   | 36.6 |                                                                      |      |
| mCherry <sup>N</sup> (GSK).TvoVMA <sup>N3</sup>     | 37.1 | TvoVMA <sup>C3</sup> .(TVI)mCherry <sup>C</sup> -H <sub>6</sub>      | 11.8 |
| mCherry <sup>N</sup> (SGK).PhoRadA <sup>N3</sup>    | 36.5 | PhoRadA <sup>C3</sup> .(TQL)mCherry <sup>C</sup> -H <sub>6</sub>     | 11.5 |
| mCherry <sup>N</sup> (HGK).Ama-Ter <sup>N3*</sup>   | 34.5 | Ama-Ter <sup>C3</sup> .(SEL)mCherry <sup>C</sup> -H <sub>6</sub>     | 11.8 |
| mCherry <sup>N</sup> (NGK).Cth-Ter <sup>N3*</sup>   | 34.3 | Cth-Ter <sup>C3</sup> .(SEL)mCherry <sup>C</sup> -H <sub>6</sub>     | 11.8 |
| mCherry <sup>N</sup> (AKA).LLP-Pol <sup>N3*</sup>   | 35.0 | LLP-Pol <sup>C3</sup> .(CNF)mCherry <sup>C</sup> -H <sub>6</sub>     | 12.0 |
| mCherry <sup>N</sup> (ATG).LP-Hel <sup>N3*</sup>    | 33.6 | LP-Hel <sup>C3</sup> .(CGK)mCherry <sup>C</sup> -H <sub>6</sub>      | 11.7 |
| mCherry <sup>N</sup> (QDQ).MP-B-DnaB <sup>N3*</sup> | 33.8 | MP-B-DnaB <sup>C3</sup> .(TKN)mCherry <sup>C</sup> -H <sub>6</sub>   | 11.8 |
| mCherry <sup>N</sup> (NGK).MP-M-DnaB <sup>N3*</sup> | 33.6 | MP-M-DnaB <sup>C3</sup> .(TEL)mCherry <sup>C</sup> -H <sub>6</sub>   | 11.6 |
| mCherry <sup>N</sup> (GKA).SaP-dpol <sup>N3*</sup>  | 34.3 | SaP-dpol <sup>C3</sup> .(CEL)mCherry <sup>C</sup> -H <sub>6</sub>    | 11.8 |
| mCherry <sup>N</sup> (SNL).NrdA-2 <sup>N3*</sup>    | 33.2 | NrdA-2 <sup>C3</sup> .(CNE)mCherry <sup>C</sup> -H <sub>6</sub>      | 11.5 |
| mCherry <sup>N</sup> (HDG).Mja-KIbA <sup>N3*</sup>  | 36.8 | Mja-KIbA <sup>C3</sup> .(CSG)mCherry <sup>C</sup> -H <sub>6</sub>    | 11.6 |

### SasG related proteins

| Full-length controls                               |                        | Assembly units                                                                      |                        |
|----------------------------------------------------|------------------------|-------------------------------------------------------------------------------------|------------------------|
| Protein name <sup>a</sup>                          | Molecular weight (kDa) | Protein name <sup>a</sup>                                                           | Molecular weight (kDa) |
| H <sub>6</sub> .sasG5 <sup>3</sup> E <sup>2</sup>  | 37.8                   | Strep.sasG5 <sup>3</sup> E <sup>2</sup> .NrdJ-1 <sup>N2</sup>                       | 50.4                   |
| H <sub>6</sub> .sasG5 <sup>6</sup> E <sup>4</sup>  | 75.2                   | NrdJ-1 <sup>C2</sup> .sasG5 <sup>3</sup> E <sup>2</sup> .gp41-1 <sup>N2</sup>       | 51.9                   |
| H <sub>6</sub> .sasG5 <sup>9</sup> E <sup>6</sup>  | 112.6                  | gp41-1 <sup>C2</sup> .sasG5 <sup>3</sup> E <sup>2</sup> .IMPDPH-1 <sup>N2</sup>     | 53.2                   |
| H <sub>6</sub> .sasG5 <sup>12</sup> E <sup>8</sup> | 149.9                  | ST.IMPDPH-1 <sup>C2</sup> .sasG5 <sup>3</sup> E <sup>2</sup> .SspGyrB <sup>N2</sup> | 55.2                   |
|                                                    |                        | SspGyrB <sup>C2</sup> .sasG5 <sup>3</sup> E <sup>2</sup> .gp41-8 <sup>N2</sup>      | 52.2                   |
|                                                    |                        | gp41-8 <sup>C2</sup> .sasG5 <sup>3</sup> E <sup>2</sup> .H <sub>6</sub>             | 43.1                   |
|                                                    |                        | gp41-1 <sup>C2</sup> .sasG5 <sup>3</sup> E <sup>2</sup> .NrdJ-1 <sup>N2</sup>       | 53.5                   |
|                                                    |                        | NrdJ-1 <sup>C2</sup> .sasG5 <sup>3</sup> E <sup>2</sup> .H <sub>6</sub>             | 48.6                   |

<sup>a</sup> \* - Intein segment with flexible linker at the canonical split site

## Supplementary Note 1 | Methods for constructing the plasmids used in this work

PCR amplifications were performed using 1  $\mu$ L DNA template (10-50 ng), 4  $\mu$ L of 5X Phusion GC Buffer, 0.4  $\mu$ L of 10 mM dNTPs (PB10.71, PCR Biosystems), 0.2  $\mu$ L of Phusion DNA Polymerase (2 U  $\mu$ L<sup>-1</sup>), 0.25  $\mu$ L of forward primer (10  $\mu$ M) and 0.25  $\mu$ L of reverse primer (10  $\mu$ M), filled up to a total volume of 20  $\mu$ L with autoclaved ddH<sub>2</sub>O. Annealing temperatures ( $T_a$ ) were calculated using Thermo Fisher Scientific's Tm Calculator online resource (<https://www.thermofisher.com/>). For amplification, a 30-40 cycles (step 2-4) PCR program with 3 min at 98 °C, 10 s at 90 °C, 15 s at  $T_a$ , 30 s per kb at 72 °C and 10 min at 72 °C was generally used. Successful DNA amplification and specificity was assessed by gel electrophoresis, analyzing 1  $\mu$ L of the reactions on 0.8-1% agarose gels. All PCR products were treated with FastDigest *DpnI* (FD1704, Thermo Fisher Scientific), by adding 1  $\mu$ L of the enzyme to the PCR reaction and incubating for 1-2 h at 37 °C, followed by 5 min at 80 °C to inactivate the enzyme. When required, the entire reaction was separated by gel electrophoresis and DNA was extracted from gels using the Wizard<sup>®</sup> SV Gel and PCR Clean-Up System (A9282, Promega), following the manufacturer's instructions, and quantified using a DS-11 Spectrophotometer (DS-11, DeNovix). Most DNA constructs were assembled following an enzyme-free cloning approach directly using *DpnI*-treated unpurified PCR fragments<sup>25</sup> or by using T5 exonuclease as it was shown to improve assembly<sup>26</sup>. For this purpose, 1-2  $\mu$ L of each corresponding PCR reaction were directly mixed with 10-100  $\mu$ L of CaCl<sub>2</sub> competent *E. coli* TOP10 cells, in 1.5 mL tubes, and incubated on ice for 30 min. When using T5 exonuclease (M0363, NEB), 1 U of the enzyme was added to the DNA mixture and incubated for 5 min at room temperature and 3 min on ice, before adding the competent cells. Heat-shock was performed for 45 s at 42 °C and cells were subsequently incubated on ice for 2 min. LB medium was added up to 1 mL and the tubes were incubated at 37 °C for 1h with shaking (160 r.p.m.). The tubes were centrifuged for 3 min at 8.000 x g, 850  $\mu$ L of the supernatant was discarded and the cell pellets were resuspended in the remaining medium and plated on LB-agar plates containing the appropriate antibiotic. When the DNA assemblies failed by this method, the NEBuilder<sup>®</sup> HiFi DNA Assembly Master Mix (E2621, NEB) was used following the manufacturer's instructions. Plasmid DNA was purified using the QIAprep Spin Miniprep Kit (27106, Qiagen) and the correct sequence was verified by Sanger sequencing (Source BioScience), prior to their use.

Unless stated differently, all the genes were cloned under the control of the arabinose-inducible promoter  $P_{araBAD}$  (BBa\_I0500) and RBS30 (BBa\_B0030). Initially, an RBS-like sequence upstream of a second ATG codon at the N-terminal sequence of mCherry was changed with synonymous mutations to prevent translation of a truncated protein and a hexahistidine-tag (H<sub>6</sub>) was added to the reporter C-terminus to allow Western blot detection (see below); these modifications were introduced by PCR. The modified mCherry reporter was cloned under the control of  $P_{araBAD}$  and RBS30, in the pSB3T5 backbone, to be used as a positive control. Subsequently,

a split control of mCherry.H<sub>6</sub> was built to assess the reporter halves self-assembly: (i) the N-terminal sequence from amino acids 1 to 159, in pSB3T5, and (ii) the C-terminal from amino acids 160 to 242, in pSB1A3. A second control was built containing extra residues corresponding to the junction sequence of the intein gp41-1: (i) the three extra residues SGY were added to the C-terminal of mCherry<sup>N</sup> and (ii) the three extra residues SSS were added to the N-terminal of mCherry<sup>C</sup>.H<sub>6</sub>. To assess the effect of the insertion of the intein junction sequences on the reporter fluorescence, the six amino acid residues were introduced between mCherry.H<sub>6</sub> amino acid residues 159 and 160, by reverse PCR. The *cis*-splicing plasmids were produced by inserting the intein sequences between the respective junction sequences. For this purpose, the DNA sequences of the inteins M86, NpuSsp, gp41-1, gp41-8, NrdJ-1, IMPDH-1, SspDnaX, SspGyrB, TerThyX, TvoVMA and PhoRadA were amplified by PCR using primers containing sequences overlapping the sequences of the primers used to amplify the recipient plasmids. The remaining inteins were synthesized with the overlap regions and were directly assembled with the PCR amplified recipient plasmids. Flexible linkers were added to NpuSsp and TerThyX by reverse PCR. The N-termini plasmids for the *trans*-splicing constructs were produced by reverse PCR using the *cis*-splicing plasmids as a template. The C-termini plasmids for the *trans*-splicing constructs were produced by PCR amplification of the corresponding regions of the inteins and cloning them into the PCR amplified plasmid containing the mCherry<sup>C</sup>.H<sub>6</sub> (pFP.R576). When indicated, the RBS was changed to RBS32 (BBa\_B0032) or a solubility/expressivity tag<sup>27</sup> was added at the N-terminus of the split inteins' C-terminal. Flexible linkers were added to NpuSsp<sup>N3</sup>, NpuSsp<sup>C1</sup>, TerThyX<sup>N3</sup> and TerThyX<sup>C1</sup> by reverse PCR. To improve protein expression of the split intein fragments M86<sup>C2</sup> and NpuSsp<sup>C2</sup> fused to Cherry<sup>C</sup>.H<sub>6</sub> for *in vitro* characterization, RBS30 and the solubility/expressivity tag were introduced by PCR and the fragment was subsequently cloned into the PCR amplified pET11 plasmid. To construct the plasmids for the split mCherry-based AND gates, the arabinose-inducible promoter of the plasmids encoding the selected C-terminal fusion proteins was replaced by the rhamnose-inducible promoter. For this purpose, the *rhaS/P<sub>rhaBAD</sub>* regulatory element was amplified by PCR and assembled with the corresponding promoterless recipient plasmids, also amplified by PCR. AND gates behavior was improved replacing RBS30 by RBS32, using reverse PCR.

Three orthogonal extracytoplasmic function (ECF) sigma factors were selected to build split intein-based gates: ECF16\_3622 (ECF16), ECF17\_1691 (ECF17) and ECF20\_992 (ECF20). Split ECF plasmids were produced by amplifying the N- and C-termini from the source plasmids and subsequently cloning them under the control of *araC/P<sub>araBAD</sub>* in pSB3T5 and *rhaS/P<sub>rhaBAD</sub>* in pSEVA221, respectively. The ECF cognate promoters P<sub>16\_3622</sub> (P<sub>16</sub>), P<sub>17\_1691</sub> (P<sub>17</sub>) and P<sub>20\_992</sub> (P<sub>20</sub>) were constructed by annealing oligonucleotides containing restriction sites and subsequently cloned upstream of the composite module containing RBS30-*gfp*-B0015 in pSB4A3, following the BioBrick RFC[10] standard. Full ECFs were PCR amplified and cloned under the control of *araC/P<sub>araBAD</sub>* in

pSB3T5. Linker mutations to the inteins' junction sequences were performed by reverse PCR. P<sub>16</sub> and P<sub>17</sub> were inserted upstream of composite modules containing RBS30-*mCherry*-B0015 in pSB3T5 and RBS30-*bfp*-B0015 in pSB1A3, respectively, by reverse PCR. Subsequently P<sub>16</sub>-RBS30-*mCherry*-B0015 and P<sub>17</sub>-RBS30-*bfp*-B0015 were transferred to pSB4A3 or assembled into the 3-reporter plasmid (P<sub>16</sub>-RBS30-*mCherry*-B0015-P<sub>17</sub>-RBS30-*bfp*-B0015-P<sub>20</sub>-RBS30-*gfp*-B0015 in pSB4A3), following the BioBrick RFC[10] standard. Since we observed terminator read-through when testing ECF16<sup>mut</sup> (**Supplementary Fig. 21**), the orientation of P<sub>16</sub>-*mCherry* in the 3-reporters plasmid was inverted to test the final circuit. For this purpose, the composite module containing *mCherry* under the control of P<sub>16</sub> was reversed by PCR amplification using primers with restriction sites and subsequently cloned upstream of B0015 in pSB4A3. Afterwards, this module was cloned upstream of P<sub>17</sub>-RBS30-*bfp*-B0015-P<sub>20</sub>-RBS30-*gfp*-B0015 in pSB4A3. Split ECF x split intein AND gates were produced by amplification of the selected inteins fragments and subsequent cloning into the plasmids carrying the respective split ECF halves. Mutation to inactivate the inteins were performed by reverse PCR using the respective split ECF x split intein AND gates plasmids as template.

To build the three-input circuit, each arabinose-, rhamnose- or AHL-induced modules were produced separately by PCR amplifying each individual part and assembling them using T5 exonuclease, as described above. The terminator B0015 was cloned upstream of the rhamnose- and the AHL-induced modules and the three modules were assembled together following the BioBrick RFC[10].

The plasmids for the expression of full-length SasG proteins and SasG assembly units were built using the NEBuilder® HiFi DNA Assembly Master Mix, as described above. For plasmids containing the SasG5<sup>9E6</sup> and SasG5<sup>12E8</sup> encoding genes, the DNA insert for the final Gibson assembly was produced by Overlap Extension PCR, following the same parameters of PCR outlined above. However, for Overlap Extension PCR reactions, where the template for the reaction was two PCR products rather than plasmid DNA, for the first 10 cycles the annealing temperature was 50 °C, followed by 35 cycles with an annealing temperature of 72 °C. Full-length SasG proteins contain inteins junction sequences between each assembled SasG5<sup>3E2</sup> to resemble the final assembly product and to facilitate cloning.

**Supplementary Data** (Provided as individual supplementary files)

**Supplementary Data 1** | *In vivo* orthogonality data.

**Supplementary Data 2** | *In vitro* orthogonality data.

**Supplementary Data 3** | *In vitro* splicing conditions screening data.

**Supplementary Data 4** | Sequences of the plasmids constructed in this work

**Source Data** | Source data underlying all reported averages in graphs and charts, and uncropped versions of any gels or blots presented in the figures.

## References

1. Appleby-Tagoe JH, Thiel IV, Wang Y, Wang Y, Mootz HD & Liu X-Q. Highly efficient and more general *cis*- and *trans*-splicing inteins through sequential directed evolution. *J. Biol. Chem.* **286**, 34440-47 (2011).
2. Lockless SW & Muir TW. Traceless protein splicing utilizing evolved split inteins. *Proc. Natl. Acad. Sci. USA* **106**, 10999-1004 (2009).
3. Iwai H, Züger S, Jin J & Tam P-H. Highly efficient protein trans-splicing by a naturally split DnaE intein from *Nostoc punctiforme*. *FEBS Lett.* **580**, 1853-58 (2006).
4. Rusch DB, Halpern AL, Sutton G, Heidelberg KB, Williamson S, Yooseph S, Wu D, Eisen JA, Hoffman JM, Remington K *et al.* The Sorcerer II Global Ocean Sampling expedition: northwest Atlantic through eastern tropical Pacific. *PLoS Biol.* **5**, e77 (2007).
5. Dassa B, London N, Stoddard BL, Schueler-Furman O & Pietrokovski S. Fractured genes: a novel genomic arrangement involving new split inteins and a new homing endonuclease family. *Nucleic Acids Res.* **37**, 2560-73 (2009).
6. Carvajal-Vallejos P, Pallissé R, Mootz HD & Schmidt SR. Unprecedented rates and efficiencies revealed for new natural split inteins from metagenomic sources. *J. Biol. Chem.* **287**, 28686-96 (2012).
7. Lin Y, Li M, Song H, Xu L, Meng Q & Liu X-Q. Protein *trans*-splicing of multiple atypical split inteins engineered from natural inteins. *PLoS ONE* **8**, e59516 (2013).
8. Aranko AS, Oemig JS, Zhou D, Kajander T, Wlodawer A & Iwai H. Structure-based engineering and comparison of novel split inteins for protein ligation. *Mol. Biosyst.* **10**, 1023-34 (2014).
9. Perler FB. InBase: the Intein Database. *Nucleic Acids Res.* **30**, 383-84 (2002).
10. Amitai G, Dassa B & Pietrokovski S. Protein splicing of inteins with atypical glutamine and aspartate C-terminal residues. *J. Biol. Chem.* **279**, 3121-31 (2004).
11. Powers TL, Drago MJ, Dorval DM, Connor KR & Mills KV. Protein splicing of a non-canonical *Clostridium thermocellum* intein with N-terminal Gln. *FASEB J.* **20**, A964-A64 (2006).
12. Tori K, Dassa B, Johnson MA, Southworth MW, Brace LE, Ishino Y, Pietrokovski S & Perler FB. Splicing of the mycobacteriophage Bethlehem DnaB intein: identification of a new mechanistic class of inteins that contain an obligate block F nucleophile. *J. Biol. Chem.* **285**, 2515-26 (2010).
13. Tori K & Perler FB. Expanding the definition of Class 3 inteins and their proposed phage origin. *J. Bacteriol.* **193**, 2035-41 (2011).
14. Iwai H, Lingel A & Plückthun A. Cyclic green fluorescent protein produced *in vivo* using an artificially split PI-*Pful* intein from *Pyrococcus furiosus*. *J. Biol. Chem.* **276**, 16548-54 (2001).
15. Komori K, Fujita N, Ichiyonagi K, Shinagawa H, Morikawa K & Ishino Y. PI-*Pful* and PI-*Pfull*, intein-coded homing endonucleases from *Pyrococcus furiosus*. I. Purification and identification of the homing-type endonuclease activities. *Nucleic Acids Res.* **27**, 4167-74 (1999).
16. Southworth MW, Benner J & Perler FB. An alternative protein splicing mechanism for inteins lacking an N-terminal nucleophile. *EMBO J.* **19**, 5019-26 (2000).
17. Ellilä S, Jurvansuu JM & Iwai H. Evaluation and comparison of protein splicing by exogenous inteins with foreign exteins in *Escherichia coli*. *FEBS Lett.* **585**, 3471-77 (2011).
18. Shetty RP, Endy D & Knight TF. Engineering BioBrick vectors from BioBrick parts. *J. Biol. Eng.* **2**, 5 (2008).
19. Liu Y, Wan X & Wang B. Engineered CRISPRa enables programmable eukaryote-like gene activation in bacteria. *Nat. Commun.* **10**, 3693 (2019).
20. Wang B, Barahona M & Buck M. Amplification of small molecule-inducible gene expression via tuning of intracellular receptor densities. *Nucleic Acids Res.* **43**, 1955-64 (2015).
21. Rhodius VA, Segall-Shapiro TH, Sharon BD, Ghodasara A, Orlova E, Tabakh H, Burkhardt DH, Clancy K, Peterson TC, Gross CA *et al.* Design of orthogonal genetic switches based on a crosstalk map of  $\sigma$ s, anti- $\sigma$ s, and promoters. *Mol. Syst. Biol.* **9**, 702 (2013).
22. Chen Y-J, Liu P, Nielsen AAK, Brophy JAN, Clancy K, Peterson T & Voigt CA. Characterization of 582 natural and synthetic terminators and quantification of their design constraints. *Nat. Methods* **10**, 659 (2013).
23. Silva-Rocha R, Martínez-García E, Calles B, Chavarría M, Arce-Rodríguez A, de Las Heras A, Páez-Espino AD, Durante-Rodríguez G, Kim J, Nickel PI *et al.* The Standard European Vector Architecture (SEVA): a coherent platform for the analysis and deployment of complex prokaryotic phenotypes. *Nucleic Acids Res.* **41**, D666-D75 (2013).
24. Gruszka DT, Whelan F, Farrance OE, Fung HKH, Paci E, Jeffries CM, Svergun DI, Baldock C, Baumann CG, Brockwell DJ *et al.* Cooperative folding of intrinsically disordered domains drives assembly of a strong elongated protein. *Nat. Commun.* **6**, 7271 (2015).
25. Li C, Wen A, Shen B, Lu J, Huang Y & Chang Y. FastCloning: a highly simplified, purification-free, sequence- and ligation-independent PCR cloning method. *BMC Biotechnol.* **11**, 92-92 (2011).
26. Xia Y, Li K, Li J, Wang T, Gu L & Xun L. T5 exonuclease-dependent assembly offers a low-cost method for efficient cloning and site-directed mutagenesis. *Nucleic Acids Res.* **47**, e15-e15 (2018).
27. Hansted JG, Pietikäinen L, Hög F, Sperling-Petersen HU & Mortensen KK. Expressivity tag: A novel tool for increased expression in *Escherichia coli*. *J. Biotechnol.* **155**, 275-83 (2011).
